# Supplementary material for: Derivation of intermediate to silicic magma from the basalt analyzed at the Vega 2 landing site, Venus
Source: PLoS One. 2018 Mar 27;13(3):e0194155. doi: 10.1371/journal.pone.0194155 (PMC5870967; doi:10.1371/journal.pone.0194155)
Supplement: S4 Table — The results presented in this file are the raw output data generated by Rhyolite-MELTS for wet partial melting of Vega 2 basalt (SO3-free) listed in Table 1. The relative oxidation state is fixed to the FMQ buffer, pressures of 0.01, 0.1 and 0.5 GPa and initial water content of 0.5 wt% were used. The liquid compositions are the basis of the model curves presented in Fig 4 of the text. (XLS) [file pone.0194155.s004.xls]

## Sheet: GPa 0.01
**********----------**********
T	=	1500	(C)	P	=	0.1	(kbars)	log(10)	f	O2	=	-5.49	delta	HM	=	-5.52	NNO	=	-0.79	QFM	=	0	COH	=	2.47	IW	=	3.17
Constraint	Flags:	fO2	path	=	QFM
Liquid	mass	=	100.1	(gm)	density	=	2.57	(gm/cc)	viscosity	=	1.03	(log	10	poise)	(analysis	in	wt	%)
	G	=	-1.74352e+06	(J)	H	=	-1.20852e+06	(J)	S	=	301.73	(J/K)	V	=	39.01	(cc)	Cp	=	155.49	(J/K)
	SiO2	TiO2	Al2O3	Fe2O3	Cr2O3	FeO	MnO	MgO	NiO	CoO	CaO	Na2O	K2O	P2O5	H2O	CO2	SO3	Cl2O-1	F2O-1
	49.95	0.22	17.52	1.19	0	7.36	0.15	12.6	0	0	8.21	2.19	0.11	0	0.5	0	0	0	0
Total	solids	mass	=	0	(gm)	density	=	0	(gm/cc)
	G	=	0	(J)	H	=	0	(J)	S	=	0	(J/K)	V	=	0	(cc)	Cp	=	0	(J/K)
Viscosity	of	the	System:	1.03	(log	10	poise)
System	mass	=	100.1	(gm)	density	=	2.57	(gm/cc)
	G	=	-1.74352e+06	(J)	H	=	-1.20852e+06	(J)	S	=	301.73	(J/K)	V	=	39.01	(cc)	Cp	=	155.49	(J/K)
Oxygen	delta	moles	=	-1.5439e-16	delta	grams	=	-4.94031e-15
	G	=	0	(J)	H	=	0	(J)	S	=	0	(J/K)	V	=	0	(cc)	Cp	=	0	(J/K)
**********----------**********
Title:	Dummy	Title
T	=	1490	(C)	P	=	0.1	(kbars)	log(10)	f	O2	=	-5.57	delta	HM	=	-5.52	NNO	=	-0.79	QFM	=	0	COH	=	2.46	IW	=	3.18
Constraint	Flags:	fO2	path	=	QFM
Liquid	mass	=	100.1	(gm)	density	=	2.57	(gm/cc)	viscosity	=	1.06	(log	10	poise)	(analysis	in	wt	%)
	G	=	-1.74051e+06	(J)	H	=	-1.21007e+06	(J)	S	=	300.85	(J/K)	V	=	38.98	(cc)	Cp	=	155.49	(J/K)
	SiO2	TiO2	Al2O3	Fe2O3	Cr2O3	FeO	MnO	MgO	NiO	CoO	CaO	Na2O	K2O	P2O5	H2O	CO2	SO3	Cl2O-1	F2O-1
	49.95	0.22	17.52	1.19	0	7.36	0.15	12.6	0	0	8.21	2.19	0.11	0	0.5	0	0	0	0
Total	solids	mass	=	0	(gm)	density	=	0	(gm/cc)
	G	=	0	(J)	H	=	0	(J)	S	=	0	(J/K)	V	=	0	(cc)	Cp	=	0	(J/K)
Viscosity	of	the	System:	1.06	(log	10	poise)
System	mass	=	100.1	(gm)	density	=	2.57	(gm/cc)
	G	=	-1.74051e+06	(J)	H	=	-1.21007e+06	(J)	S	=	300.85	(J/K)	V	=	38.98	(cc)	Cp	=	155.49	(J/K)
Oxygen	delta	moles	=	1.48262e-06	delta	grams	=	4.7442e-05
	G	=	-0.62	(J)	H	=	0.07	(J)	S	=	0	(J/K)	V	=	0.22	(cc)	Cp	=	0	(J/K)
**********----------**********
Title:	Dummy	Title
T	=	1480	(C)	P	=	0.1	(kbars)	log(10)	f	O2	=	-5.65	delta	HM	=	-5.52	NNO	=	-0.79	QFM	=	0	COH	=	2.46	IW	=	3.19
Constraint	Flags:	fO2	path	=	QFM
Liquid	mass	=	100.1	(gm)	density	=	2.57	(gm/cc)	viscosity	=	1.09	(log	10	poise)	(analysis	in	wt	%)
	G	=	-1.73751e+06	(J)	H	=	-1.21163e+06	(J)	S	=	299.96	(J/K)	V	=	38.95	(cc)	Cp	=	155.49	(J/K)
	SiO2	TiO2	Al2O3	Fe2O3	Cr2O3	FeO	MnO	MgO	NiO	CoO	CaO	Na2O	K2O	P2O5	H2O	CO2	SO3	Cl2O-1	F2O-1
	49.95	0.22	17.52	1.19	0	7.36	0.15	12.6	0	0	8.21	2.19	0.11	0	0.5	0	0	0	0
Total	solids	mass	=	0	(gm)	density	=	0	(gm/cc)
	G	=	0	(J)	H	=	0	(J)	S	=	0	(J/K)	V	=	0	(cc)	Cp	=	0	(J/K)
Viscosity	of	the	System:	1.09	(log	10	poise)
System	mass	=	100.1	(gm)	density	=	2.57	(gm/cc)
	G	=	-1.73751e+06	(J)	H	=	-1.21163e+06	(J)	S	=	299.96	(J/K)	V	=	38.95	(cc)	Cp	=	155.49	(J/K)
Oxygen	delta	moles	=	3.33774e-06	delta	grams	=	0.000106804
	G	=	-1.38	(J)	H	=	0.17	(J)	S	=	0	(J/K)	V	=	0.49	(cc)	Cp	=	0	(J/K)
**********----------**********
Title:	Dummy	Title
T	=	1470	(C)	P	=	0.1	(kbars)	log(10)	f	O2	=	-5.73	delta	HM	=	-5.52	NNO	=	-0.78	QFM	=	0	COH	=	2.45	IW	=	3.2
Constraint	Flags:	fO2	path	=	QFM
Liquid	mass	=	100.1	(gm)	density	=	2.57	(gm/cc)	viscosity	=	1.12	(log	10	poise)	(analysis	in	wt	%)
	G	=	-1.73451e+06	(J)	H	=	-1.21318e+06	(J)	S	=	299.07	(J/K)	V	=	38.92	(cc)	Cp	=	155.48	(J/K)
	SiO2	TiO2	Al2O3	Fe2O3	Cr2O3	FeO	MnO	MgO	NiO	CoO	CaO	Na2O	K2O	P2O5	H2O	CO2	SO3	Cl2O-1	F2O-1
	49.95	0.22	17.52	1.19	0	7.36	0.15	12.6	0	0	8.21	2.19	0.11	0	0.5	0	0	0	0
Total	solids	mass	=	0	(gm)	density	=	0	(gm/cc)
	G	=	0	(J)	H	=	0	(J)	S	=	0	(J/K)	V	=	0	(cc)	Cp	=	0	(J/K)
Viscosity	of	the	System:	1.12	(log	10	poise)
System	mass	=	100.1	(gm)	density	=	2.57	(gm/cc)
	G	=	-1.73451e+06	(J)	H	=	-1.21318e+06	(J)	S	=	299.07	(J/K)	V	=	38.92	(cc)	Cp	=	155.48	(J/K)
Oxygen	delta	moles	=	5.57428e-06	delta	grams	=	0.00017837
	G	=	-2.28	(J)	H	=	0.28	(J)	S	=	0	(J/K)	V	=	0.81	(cc)	Cp	=	0	(J/K)
**********----------**********
Title:	Dummy	Title
T	=	1460	(C)	P	=	0.1	(kbars)	log(10)	f	O2	=	-5.81	delta	HM	=	-5.53	NNO	=	-0.78	QFM	=	0	COH	=	2.44	IW	=	3.21
Constraint	Flags:	fO2	path	=	QFM
Liquid	mass	=	100.1	(gm)	density	=	2.57	(gm/cc)	viscosity	=	1.15	(log	10	poise)	(analysis	in	wt	%)
	G	=	-1.73153e+06	(J)	H	=	-1.21474e+06	(J)	S	=	298.18	(J/K)	V	=	38.89	(cc)	Cp	=	155.48	(J/K)
	SiO2	TiO2	Al2O3	Fe2O3	Cr2O3	FeO	MnO	MgO	NiO	CoO	CaO	Na2O	K2O	P2O5	H2O	CO2	SO3	Cl2O-1	F2O-1
	49.95	0.22	17.52	1.19	0	7.36	0.15	12.6	0	0	8.21	2.19	0.11	0	0.5	0	0	0	0
Total	solids	mass	=	0	(gm)	density	=	0	(gm/cc)
	G	=	0	(J)	H	=	0	(J)	S	=	0	(J/K)	V	=	0	(cc)	Cp	=	0	(J/K)
Viscosity	of	the	System:	1.15	(log	10	poise)
System	mass	=	100.1	(gm)	density	=	2.57	(gm/cc)
	G	=	-1.73153e+06	(J)	H	=	-1.21474e+06	(J)	S	=	298.18	(J/K)	V	=	38.89	(cc)	Cp	=	155.48	(J/K)
Oxygen	delta	moles	=	8.20149e-06	delta	grams	=	0.000262438
	G	=	-3.34	(J)	H	=	0.4	(J)	S	=	0	(J/K)	V	=	1.18	(cc)	Cp	=	0	(J/K)
**********----------**********
Title:	Dummy	Title
T	=	1450	(C)	P	=	0.1	(kbars)	log(10)	f	O2	=	-5.89	delta	HM	=	-5.53	NNO	=	-0.78	QFM	=	0	COH	=	2.44	IW	=	3.21
Constraint	Flags:	fO2	path	=	QFM
Liquid	mass	=	100.1	(gm)	density	=	2.58	(gm/cc)	viscosity	=	1.18	(log	10	poise)	(analysis	in	wt	%)
	G	=	-1.72855e+06	(J)	H	=	-1.21629e+06	(J)	S	=	297.28	(J/K)	V	=	38.86	(cc)	Cp	=	155.48	(J/K)
	SiO2	TiO2	Al2O3	Fe2O3	Cr2O3	FeO	MnO	MgO	NiO	CoO	CaO	Na2O	K2O	P2O5	H2O	CO2	SO3	Cl2O-1	F2O-1
	49.95	0.22	17.52	1.2	0	7.36	0.15	12.6	0	0	8.21	2.19	0.11	0	0.5	0	0	0	0
Total	solids	mass	=	0	(gm)	density	=	0	(gm/cc)
	G	=	0	(J)	H	=	0	(J)	S	=	0	(J/K)	V	=	0	(cc)	Cp	=	0	(J/K)
Viscosity	of	the	System:	1.18	(log	10	poise)
System	mass	=	100.1	(gm)	density	=	2.58	(gm/cc)
	G	=	-1.72855e+06	(J)	H	=	-1.21629e+06	(J)	S	=	297.28	(J/K)	V	=	38.86	(cc)	Cp	=	155.48	(J/K)
Oxygen	delta	moles	=	1.1229e-05	delta	grams	=	0.000359314
	G	=	-4.54	(J)	H	=	0.55	(J)	S	=	0	(J/K)	V	=	1.61	(cc)	Cp	=	0	(J/K)
**********----------**********
Title:	Dummy	Title
T	=	1440	(C)	P	=	0.1	(kbars)	log(10)	f	O2	=	-5.97	delta	HM	=	-5.53	NNO	=	-0.78	QFM	=	0	COH	=	2.43	IW	=	3.22
Constraint	Flags:	fO2	path	=	QFM
Liquid	mass	=	100.1	(gm)	density	=	2.58	(gm/cc)	viscosity	=	1.22	(log	10	poise)	(analysis	in	wt	%)
	G	=	-1.72559e+06	(J)	H	=	-1.21785e+06	(J)	S	=	296.38	(J/K)	V	=	38.83	(cc)	Cp	=	155.48	(J/K)
	SiO2	TiO2	Al2O3	Fe2O3	Cr2O3	FeO	MnO	MgO	NiO	CoO	CaO	Na2O	K2O	P2O5	H2O	CO2	SO3	Cl2O-1	F2O-1
	49.95	0.22	17.52	1.2	0	7.35	0.15	12.6	0	0	8.21	2.19	0.11	0	0.5	0	0	0	0
Total	solids	mass	=	0	(gm)	density	=	0	(gm/cc)
	G	=	0	(J)	H	=	0	(J)	S	=	0	(J/K)	V	=	0	(cc)	Cp	=	0	(J/K)
Viscosity	of	the	System:	1.22	(log	10	poise)
System	mass	=	100.1	(gm)	density	=	2.58	(gm/cc)
	G	=	-1.72559e+06	(J)	H	=	-1.21785e+06	(J)	S	=	296.38	(J/K)	V	=	38.83	(cc)	Cp	=	155.48	(J/K)
Oxygen	delta	moles	=	1.46667e-05	delta	grams	=	0.000469317
	G	=	-5.9	(J)	H	=	0.71	(J)	S	=	0	(J/K)	V	=	2.09	(cc)	Cp	=	0	(J/K)
**********----------**********
Title:	Dummy	Title
T	=	1430	(C)	P	=	0.1	(kbars)	log(10)	f	O2	=	-6.05	delta	HM	=	-5.53	NNO	=	-0.78	QFM	=	0	COH	=	2.42	IW	=	3.23
Constraint	Flags:	fO2	path	=	QFM
Liquid	mass	=	100.1	(gm)	density	=	2.58	(gm/cc)	viscosity	=	1.25	(log	10	poise)	(analysis	in	wt	%)
	G	=	-1.72263e+06	(J)	H	=	-1.21941e+06	(J)	S	=	295.47	(J/K)	V	=	38.8	(cc)	Cp	=	155.48	(J/K)
	SiO2	TiO2	Al2O3	Fe2O3	Cr2O3	FeO	MnO	MgO	NiO	CoO	CaO	Na2O	K2O	P2O5	H2O	CO2	SO3	Cl2O-1	F2O-1
	49.95	0.22	17.52	1.2	0	7.35	0.15	12.6	0	0	8.21	2.19	0.11	0	0.5	0	0	0	0
Total	solids	mass	=	0	(gm)	density	=	0	(gm/cc)
	G	=	0	(J)	H	=	0	(J)	S	=	0	(J/K)	V	=	0	(cc)	Cp	=	0	(J/K)
Viscosity	of	the	System:	1.25	(log	10	poise)
System	mass	=	100.1	(gm)	density	=	2.58	(gm/cc)
	G	=	-1.72263e+06	(J)	H	=	-1.21941e+06	(J)	S	=	295.47	(J/K)	V	=	38.8	(cc)	Cp	=	155.48	(J/K)
Oxygen	delta	moles	=	1.8525e-05	delta	grams	=	0.000592778
	G	=	-7.4	(J)	H	=	0.89	(J)	S	=	0	(J/K)	V	=	2.62	(cc)	Cp	=	0	(J/K)
**********----------**********
Title:	Dummy	Title
T	=	1420	(C)	P	=	0.1	(kbars)	log(10)	f	O2	=	-6.14	delta	HM	=	-5.53	NNO	=	-0.78	QFM	=	0	COH	=	2.41	IW	=	3.24
Constraint	Flags:	fO2	path	=	QFM
Liquid	mass	=	100.1	(gm)	density	=	2.58	(gm/cc)	viscosity	=	1.28	(log	10	poise)	(analysis	in	wt	%)
	G	=	-1.71968e+06	(J)	H	=	-1.22096e+06	(J)	S	=	294.55	(J/K)	V	=	38.77	(cc)	Cp	=	155.48	(J/K)
	SiO2	TiO2	Al2O3	Fe2O3	Cr2O3	FeO	MnO	MgO	NiO	CoO	CaO	Na2O	K2O	P2O5	H2O	CO2	SO3	Cl2O-1	F2O-1
	49.95	0.22	17.52	1.2	0	7.35	0.15	12.6	0	0	8.21	2.19	0.11	0	0.5	0	0	0	0
Total	solids	mass	=	0	(gm)	density	=	0	(gm/cc)
	G	=	0	(J)	H	=	0	(J)	S	=	0	(J/K)	V	=	0	(cc)	Cp	=	0	(J/K)
Viscosity	of	the	System:	1.28	(log	10	poise)
System	mass	=	100.1	(gm)	density	=	2.58	(gm/cc)
	G	=	-1.71968e+06	(J)	H	=	-1.22096e+06	(J)	S	=	294.55	(J/K)	V	=	38.77	(cc)	Cp	=	155.48	(J/K)
Oxygen	delta	moles	=	2.28146e-05	delta	grams	=	0.000730041
	G	=	-9.05	(J)	H	=	1.09	(J)	S	=	0.01	(J/K)	V	=	3.21	(cc)	Cp	=	0	(J/K)
**********----------**********
Title:	Dummy	Title
T	=	1410	(C)	P	=	0.1	(kbars)	log(10)	f	O2	=	-6.23	delta	HM	=	-5.54	NNO	=	-0.77	QFM	=	0	COH	=	2.41	IW	=	3.25
Constraint	Flags:	fO2	path	=	QFM
Liquid	mass	=	100.1	(gm)	density	=	2.58	(gm/cc)	viscosity	=	1.31	(log	10	poise)	(analysis	in	wt	%)
	G	=	-1.71674e+06	(J)	H	=	-1.22252e+06	(J)	S	=	293.63	(J/K)	V	=	38.74	(cc)	Cp	=	155.48	(J/K)
	SiO2	TiO2	Al2O3	Fe2O3	Cr2O3	FeO	MnO	MgO	NiO	CoO	CaO	Na2O	K2O	P2O5	H2O	CO2	SO3	Cl2O-1	F2O-1
	49.95	0.22	17.52	1.2	0	7.35	0.15	12.6	0	0	8.21	2.19	0.11	0	0.5	0	0	0	0
Total	solids	mass	=	0	(gm)	density	=	0	(gm/cc)
	G	=	0	(J)	H	=	0	(J)	S	=	0	(J/K)	V	=	0	(cc)	Cp	=	0	(J/K)
Viscosity	of	the	System:	1.31	(log	10	poise)
System	mass	=	100.1	(gm)	density	=	2.58	(gm/cc)
	G	=	-1.71674e+06	(J)	H	=	-1.22252e+06	(J)	S	=	293.63	(J/K)	V	=	38.74	(cc)	Cp	=	155.48	(J/K)
Oxygen	delta	moles	=	2.75468e-05	delta	grams	=	0.000881463
	G	=	-10.86	(J)	H	=	1.3	(J)	S	=	0.01	(J/K)	V	=	3.85	(cc)	Cp	=	0	(J/K)
**********----------**********
Title:	Dummy	Title
T	=	1400	(C)	P	=	0.1	(kbars)	log(10)	f	O2	=	-6.31	delta	HM	=	-5.54	NNO	=	-0.77	QFM	=	0	COH	=	2.4	IW	=	3.26
Constraint	Flags:	fO2	path	=	QFM
Liquid	mass	=	100.1	(gm)	density	=	2.59	(gm/cc)	viscosity	=	1.34	(log	10	poise)	(analysis	in	wt	%)
	G	=	-1.71381e+06	(J)	H	=	-1.22408e+06	(J)	S	=	292.7	(J/K)	V	=	38.71	(cc)	Cp	=	155.48	(J/K)
	SiO2	TiO2	Al2O3	Fe2O3	Cr2O3	FeO	MnO	MgO	NiO	CoO	CaO	Na2O	K2O	P2O5	H2O	CO2	SO3	Cl2O-1	F2O-1
	49.95	0.22	17.52	1.2	0	7.35	0.15	12.6	0	0	8.21	2.19	0.11	0	0.5	0	0	0	0
Total	solids	mass	=	0	(gm)	density	=	0	(gm/cc)
	G	=	0	(J)	H	=	0	(J)	S	=	0	(J/K)	V	=	0	(cc)	Cp	=	0	(J/K)
Viscosity	of	the	System:	1.34	(log	10	poise)
System	mass	=	100.1	(gm)	density	=	2.59	(gm/cc)
	G	=	-1.71381e+06	(J)	H	=	-1.22408e+06	(J)	S	=	292.7	(J/K)	V	=	38.71	(cc)	Cp	=	155.48	(J/K)
Oxygen	delta	moles	=	3.2733e-05	delta	grams	=	0.00104742
	G	=	-12.82	(J)	H	=	1.54	(J)	S	=	0.01	(J/K)	V	=	4.55	(cc)	Cp	=	0	(J/K)
**********----------**********
Title:	Dummy	Title
T	=	1390	(C)	P	=	0.1	(kbars)	log(10)	f	O2	=	-6.4	delta	HM	=	-5.54	NNO	=	-0.77	QFM	=	0	COH	=	2.39	IW	=	3.26
Constraint	Flags:	fO2	path	=	QFM
Liquid	mass	=	100.1	(gm)	density	=	2.59	(gm/cc)	viscosity	=	1.38	(log	10	poise)	(analysis	in	wt	%)
	G	=	-1.7109e+06	(J)	H	=	-1.22563e+06	(J)	S	=	291.77	(J/K)	V	=	38.67	(cc)	Cp	=	155.48	(J/K)
	SiO2	TiO2	Al2O3	Fe2O3	Cr2O3	FeO	MnO	MgO	NiO	CoO	CaO	Na2O	K2O	P2O5	H2O	CO2	SO3	Cl2O-1	F2O-1
	49.95	0.22	17.52	1.2	0	7.35	0.15	12.6	0	0	8.21	2.19	0.11	0	0.5	0	0	0	0
Total	solids	mass	=	0	(gm)	density	=	0	(gm/cc)
	G	=	0	(J)	H	=	0	(J)	S	=	0	(J/K)	V	=	0	(cc)	Cp	=	0	(J/K)
Viscosity	of	the	System:	1.38	(log	10	poise)
System	mass	=	100.1	(gm)	density	=	2.59	(gm/cc)
	G	=	-1.7109e+06	(J)	H	=	-1.22563e+06	(J)	S	=	291.77	(J/K)	V	=	38.67	(cc)	Cp	=	155.48	(J/K)
Oxygen	delta	moles	=	3.83853e-05	delta	grams	=	0.00122828
	G	=	-14.93	(J)	H	=	1.79	(J)	S	=	0.01	(J/K)	V	=	5.31	(cc)	Cp	=	0	(J/K)
**********----------**********
Title:	Dummy	Title
T	=	1380	(C)	P	=	0.1	(kbars)	log(10)	f	O2	=	-6.49	delta	HM	=	-5.54	NNO	=	-0.77	QFM	=	0	COH	=	2.38	IW	=	3.27
Constraint	Flags:	fO2	path	=	QFM
Liquid	mass	=	100.1	(gm)	density	=	2.59	(gm/cc)	viscosity	=	1.41	(log	10	poise)	(analysis	in	wt	%)
	G	=	-1.70799e+06	(J)	H	=	-1.22719e+06	(J)	S	=	290.83	(J/K)	V	=	38.64	(cc)	Cp	=	155.48	(J/K)
	SiO2	TiO2	Al2O3	Fe2O3	Cr2O3	FeO	MnO	MgO	NiO	CoO	CaO	Na2O	K2O	P2O5	H2O	CO2	SO3	Cl2O-1	F2O-1
	49.95	0.22	17.52	1.21	0	7.35	0.15	12.6	0	0	8.21	2.19	0.11	0	0.5	0	0	0	0
Total	solids	mass	=	0	(gm)	density	=	0	(gm/cc)
	G	=	0	(J)	H	=	0	(J)	S	=	0	(J/K)	V	=	0	(cc)	Cp	=	0	(J/K)
Viscosity	of	the	System:	1.41	(log	10	poise)
System	mass	=	100.1	(gm)	density	=	2.59	(gm/cc)
	G	=	-1.70799e+06	(J)	H	=	-1.22719e+06	(J)	S	=	290.83	(J/K)	V	=	38.64	(cc)	Cp	=	155.48	(J/K)
Oxygen	delta	moles	=	4.45164e-05	delta	grams	=	0.00142447
	G	=	-17.2	(J)	H	=	2.06	(J)	S	=	0.01	(J/K)	V	=	6.12	(cc)	Cp	=	0	(J/K)
**********----------**********
Title:	Dummy	Title
T	=	1370	(C)	P	=	0.1	(kbars)	log(10)	f	O2	=	-6.58	delta	HM	=	-5.55	NNO	=	-0.77	QFM	=	0	COH	=	2.38	IW	=	3.28
Constraint	Flags:	fO2	path	=	QFM
Liquid	mass	=	100.1	(gm)	density	=	2.59	(gm/cc)	viscosity	=	1.44	(log	10	poise)	(analysis	in	wt	%)
	G	=	-1.70509e+06	(J)	H	=	-1.22875e+06	(J)	S	=	289.89	(J/K)	V	=	38.61	(cc)	Cp	=	155.48	(J/K)
	SiO2	TiO2	Al2O3	Fe2O3	Cr2O3	FeO	MnO	MgO	NiO	CoO	CaO	Na2O	K2O	P2O5	H2O	CO2	SO3	Cl2O-1	F2O-1
	49.95	0.22	17.52	1.21	0	7.34	0.15	12.6	0	0	8.21	2.19	0.11	0	0.5	0	0	0	0
Total	solids	mass	=	0	(gm)	density	=	0	(gm/cc)
	G	=	0	(J)	H	=	0	(J)	S	=	0	(J/K)	V	=	0	(cc)	Cp	=	0	(J/K)
Viscosity	of	the	System:	1.44	(log	10	poise)
System	mass	=	100.1	(gm)	density	=	2.59	(gm/cc)
	G	=	-1.70509e+06	(J)	H	=	-1.22875e+06	(J)	S	=	289.89	(J/K)	V	=	38.61	(cc)	Cp	=	155.48	(J/K)
Oxygen	delta	moles	=	5.11392e-05	delta	grams	=	0.00163639
	G	=	-19.62	(J)	H	=	2.34	(J)	S	=	0.01	(J/K)	V	=	6.99	(cc)	Cp	=	0	(J/K)
**********----------**********
Title:	Dummy	Title
T	=	1360	(C)	P	=	0.1	(kbars)	log(10)	f	O2	=	-6.67	delta	HM	=	-5.55	NNO	=	-0.76	QFM	=	0	COH	=	2.37	IW	=	3.29
Constraint	Flags:	fO2	path	=	QFM
Liquid	mass	=	100.1	(gm)	density	=	2.59	(gm/cc)	viscosity	=	1.48	(log	10	poise)	(analysis	in	wt	%)
	G	=	-1.7022e+06	(J)	H	=	-1.23031e+06	(J)	S	=	288.94	(J/K)	V	=	38.58	(cc)	Cp	=	155.48	(J/K)
	SiO2	TiO2	Al2O3	Fe2O3	Cr2O3	FeO	MnO	MgO	NiO	CoO	CaO	Na2O	K2O	P2O5	H2O	CO2	SO3	Cl2O-1	F2O-1
	49.95	0.22	17.52	1.21	0	7.34	0.15	12.6	0	0	8.21	2.19	0.11	0	0.5	0	0	0	0
Total	solids	mass	=	0	(gm)	density	=	0	(gm/cc)
	G	=	0	(J)	H	=	0	(J)	S	=	0	(J/K)	V	=	0	(cc)	Cp	=	0	(J/K)
Viscosity	of	the	System:	1.48	(log	10	poise)
System	mass	=	100.1	(gm)	density	=	2.59	(gm/cc)
	G	=	-1.7022e+06	(J)	H	=	-1.23031e+06	(J)	S	=	288.94	(J/K)	V	=	38.58	(cc)	Cp	=	155.48	(J/K)
Oxygen	delta	moles	=	5.82672e-05	delta	grams	=	0.00186448
	G	=	-22.2	(J)	H	=	2.65	(J)	S	=	0.02	(J/K)	V	=	7.91	(cc)	Cp	=	0	(J/K)
**********----------**********
Title:	Dummy	Title
T	=	1350	(C)	P	=	0.1	(kbars)	log(10)	f	O2	=	-6.76	delta	HM	=	-5.55	NNO	=	-0.76	QFM	=	0	COH	=	2.36	IW	=	3.3
Constraint	Flags:	fO2	path	=	QFM
Liquid	mass	=	100.1	(gm)	density	=	2.6	(gm/cc)	viscosity	=	1.51	(log	10	poise)	(analysis	in	wt	%)
	G	=	-1.69932e+06	(J)	H	=	-1.23187e+06	(J)	S	=	287.99	(J/K)	V	=	38.55	(cc)	Cp	=	155.48	(J/K)
	SiO2	TiO2	Al2O3	Fe2O3	Cr2O3	FeO	MnO	MgO	NiO	CoO	CaO	Na2O	K2O	P2O5	H2O	CO2	SO3	Cl2O-1	F2O-1
	49.95	0.22	17.52	1.21	0	7.34	0.15	12.6	0	0	8.21	2.19	0.11	0	0.5	0	0	0	0
Total	solids	mass	=	0	(gm)	density	=	0	(gm/cc)
	G	=	0	(J)	H	=	0	(J)	S	=	0	(J/K)	V	=	0	(cc)	Cp	=	0	(J/K)
Viscosity	of	the	System:	1.51	(log	10	poise)
System	mass	=	100.1	(gm)	density	=	2.6	(gm/cc)
	G	=	-1.69932e+06	(J)	H	=	-1.23187e+06	(J)	S	=	287.99	(J/K)	V	=	38.55	(cc)	Cp	=	155.48	(J/K)
Oxygen	delta	moles	=	6.59147e-05	delta	grams	=	0.00210919
	G	=	-24.94	(J)	H	=	2.97	(J)	S	=	0.02	(J/K)	V	=	8.9	(cc)	Cp	=	0	(J/K)
**********----------**********
Title:	Dummy	Title
T	=	1340	(C)	P	=	0.1	(kbars)	log(10)	f	O2	=	-6.85	delta	HM	=	-5.55	NNO	=	-0.76	QFM	=	0	COH	=	2.35	IW	=	3.31
Constraint	Flags:	fO2	path	=	QFM
Liquid	mass	=	100.1	(gm)	density	=	2.6	(gm/cc)	viscosity	=	1.55	(log	10	poise)	(analysis	in	wt	%)
	G	=	-1.69645e+06	(J)	H	=	-1.23342e+06	(J)	S	=	287.03	(J/K)	V	=	38.52	(cc)	Cp	=	155.48	(J/K)
	SiO2	TiO2	Al2O3	Fe2O3	Cr2O3	FeO	MnO	MgO	NiO	CoO	CaO	Na2O	K2O	P2O5	H2O	CO2	SO3	Cl2O-1	F2O-1
	49.95	0.22	17.52	1.22	0	7.34	0.15	12.6	0	0	8.21	2.19	0.11	0	0.5	0	0	0	0
Total	solids	mass	=	0	(gm)	density	=	0	(gm/cc)
	G	=	0	(J)	H	=	0	(J)	S	=	0	(J/K)	V	=	0	(cc)	Cp	=	0	(J/K)
Viscosity	of	the	System:	1.55	(log	10	poise)
System	mass	=	100.1	(gm)	density	=	2.6	(gm/cc)
	G	=	-1.69645e+06	(J)	H	=	-1.23342e+06	(J)	S	=	287.03	(J/K)	V	=	38.52	(cc)	Cp	=	155.48	(J/K)
Oxygen	delta	moles	=	7.40963e-05	delta	grams	=	0.00237099
	G	=	-27.85	(J)	H	=	3.32	(J)	S	=	0.02	(J/K)	V	=	9.94	(cc)	Cp	=	0	(J/K)
**********----------**********
Title:	Dummy	Title
T	=	1330	(C)	P	=	0.1	(kbars)	log(10)	f	O2	=	-6.95	delta	HM	=	-5.55	NNO	=	-0.76	QFM	=	0	COH	=	2.34	IW	=	3.32
Constraint	Flags:	fO2	path	=	QFM
Liquid	mass	=	100.1	(gm)	density	=	2.6	(gm/cc)	viscosity	=	1.58	(log	10	poise)	(analysis	in	wt	%)
	G	=	-1.69359e+06	(J)	H	=	-1.23498e+06	(J)	S	=	286.06	(J/K)	V	=	38.49	(cc)	Cp	=	155.48	(J/K)
	SiO2	TiO2	Al2O3	Fe2O3	Cr2O3	FeO	MnO	MgO	NiO	CoO	CaO	Na2O	K2O	P2O5	H2O	CO2	SO3	Cl2O-1	F2O-1
	49.95	0.22	17.52	1.22	0	7.34	0.15	12.6	0	0	8.21	2.19	0.11	0	0.5	0	0	0	0
Total	solids	mass	=	0	(gm)	density	=	0	(gm/cc)
	G	=	0	(J)	H	=	0	(J)	S	=	0	(J/K)	V	=	0	(cc)	Cp	=	0	(J/K)
Viscosity	of	the	System:	1.58	(log	10	poise)
System	mass	=	100.1	(gm)	density	=	2.6	(gm/cc)
	G	=	-1.69359e+06	(J)	H	=	-1.23498e+06	(J)	S	=	286.06	(J/K)	V	=	38.49	(cc)	Cp	=	155.48	(J/K)
Oxygen	delta	moles	=	8.28273e-05	delta	grams	=	0.00265037
	G	=	-30.91	(J)	H	=	3.68	(J)	S	=	0.02	(J/K)	V	=	11.04	(cc)	Cp	=	0	(J/K)
**********----------**********
Title:	Dummy	Title
T	=	1320	(C)	P	=	0.1	(kbars)	log(10)	f	O2	=	-7.05	delta	HM	=	-5.56	NNO	=	-0.76	QFM	=	0	COH	=	2.34	IW	=	3.33
Constraint	Flags:	fO2	path	=	QFM
Liquid	mass	=	100	(gm)	density	=	2.6	(gm/cc)	viscosity	=	1.62	(log	10	poise)	(analysis	in	wt	%)
	G	=	-1.68906e+06	(J)	H	=	-1.23532e+06	(J)	S	=	284.81	(J/K)	V	=	38.43	(cc)	Cp	=	155.29	(J/K)
	SiO2	TiO2	Al2O3	Fe2O3	Cr2O3	FeO	MnO	MgO	NiO	CoO	CaO	Na2O	K2O	P2O5	H2O	CO2	SO3	Cl2O-1	F2O-1
	49.96	0.22	17.54	1.22	0	7.33	0.15	12.56	0	0	8.22	2.19	0.11	0	0.5	0	0	0	0
olivine	mass	=	0.1	(gm)	density	=	3.18	(gm/cc)	(analysis	in	mole	%)
	(Ca0.00Mg0.90Fe''0.10Mn0.00Co0.00Ni0.00)2SiO4
	G	=	-1674.81	(J)	H	=	-1271.01	(J)	S	=	0.25	(J/K)	V	=	0.03	(cc)	Cp	=	0.13	(J/K)
	tephroite	fayalite	co-olivine	ni-olivine	monticellite	forsterite
	0.17	10.15	0	0	0.72	88.95
Total	solids	mass	=	0.1	(gm)	density	=	3.18	(gm/cc)
	G	=	-1674.81	(J)	H	=	-1271.01	(J)	S	=	0.25	(J/K)	V	=	0.03	(cc)	Cp	=	0.13	(J/K)
Viscosity	of	the	System:	1.62	(log	10	poise)
System	mass	=	100.1	(gm)	density	=	2.6	(gm/cc)
	G	=	-1.69073e+06	(J)	H	=	-1.23659e+06	(J)	S	=	285.06	(J/K)	V	=	38.46	(cc)	Cp	=	155.42	(J/K)
Oxygen	delta	moles	=	8.83332e-05	delta	grams	=	0.00282656
	G	=	-32.74	(J)	H	=	3.89	(J)	S	=	0.02	(J/K)	V	=	11.7	(cc)	Cp	=	0	(J/K)
**********----------**********
Title:	Dummy	Title
T	=	1310	(C)	P	=	0.1	(kbars)	log(10)	f	O2	=	-7.14	delta	HM	=	-5.56	NNO	=	-0.75	QFM	=	0	COH	=	2.33	IW	=	3.34
Constraint	Flags:	fO2	path	=	QFM
Liquid	mass	=	98.78	(gm)	density	=	2.6	(gm/cc)	viscosity	=	1.7	(log	10	poise)	(analysis	in	wt	%)
	G	=	-1.66566e+06	(J)	H	=	-1.22186e+06	(J)	S	=	280.33	(J/K)	V	=	37.98	(cc)	Cp	=	153.06	(J/K)
	SiO2	TiO2	Al2O3	Fe2O3	Cr2O3	FeO	MnO	MgO	NiO	CoO	CaO	Na2O	K2O	P2O5	H2O	CO2	SO3	Cl2O-1	F2O-1
	50.07	0.22	17.76	1.22	0	7.31	0.15	12.11	0	0	8.32	2.22	0.11	0	0.51	0	0	0	0
olivine	mass	=	1.32	(gm)	density	=	3.18	(gm/cc)	(analysis	in	mole	%)
	(Ca0.00Mg0.89Fe''0.10Mn0.00Co0.00Ni0.00)2SiO4
	G	=	-22208.1	(J)	H	=	-16887.1	(J)	S	=	3.36	(J/K)	V	=	0.42	(cc)	Cp	=	1.7	(J/K)
	tephroite	fayalite	co-olivine	ni-olivine	monticellite	forsterite
	0.18	10.47	0	0	0.74	88.61
Total	solids	mass	=	1.32	(gm)	density	=	3.18	(gm/cc)
	G	=	-22208.1	(J)	H	=	-16887.1	(J)	S	=	3.36	(J/K)	V	=	0.42	(cc)	Cp	=	1.7	(J/K)
Viscosity	of	the	System:	1.72	(log	10	poise)
System	mass	=	100.1	(gm)	density	=	2.61	(gm/cc)
	G	=	-1.68787e+06	(J)	H	=	-1.23875e+06	(J)	S	=	283.69	(J/K)	V	=	38.4	(cc)	Cp	=	154.77	(J/K)
Oxygen	delta	moles	=	4.98424e-05	delta	grams	=	0.0015949
	G	=	-18.34	(J)	H	=	2.17	(J)	S	=	0.01	(J/K)	V	=	6.56	(cc)	Cp	=	0	(J/K)
**********----------**********
Title:	Dummy	Title
T	=	1300	(C)	P	=	0.1	(kbars)	log(10)	f	O2	=	-7.24	delta	HM	=	-5.56	NNO	=	-0.75	QFM	=	0	COH	=	2.32	IW	=	3.35
Constraint	Flags:	fO2	path	=	QFM
Liquid	mass	=	97.59	(gm)	density	=	2.6	(gm/cc)	viscosity	=	1.77	(log	10	poise)	(analysis	in	wt	%)
	G	=	-1.64312e+06	(J)	H	=	-1.20895e+06	(J)	S	=	275.99	(J/K)	V	=	37.55	(cc)	Cp	=	150.92	(J/K)
	SiO2	TiO2	Al2O3	Fe2O3	Cr2O3	FeO	MnO	MgO	NiO	CoO	CaO	Na2O	K2O	P2O5	H2O	CO2	SO3	Cl2O-1	F2O-1
	50.19	0.23	17.97	1.23	0	7.28	0.15	11.68	0	0	8.42	2.24	0.11	0	0.51	0	0	0	0
olivine	mass	=	2.51	(gm)	density	=	3.19	(gm/cc)	(analysis	in	mole	%)
	(Ca0.00Mg0.89Fe''0.11Mn0.00Co0.00Ni0.00)2SiO4
	G	=	-41888.7	(J)	H	=	-31915	(J)	S	=	6.34	(J/K)	V	=	0.79	(cc)	Cp	=	3.22	(J/K)
	tephroite	fayalite	co-olivine	ni-olivine	monticellite	forsterite
	0.18	10.8	0	0	0.75	88.27
Total	solids	mass	=	2.51	(gm)	density	=	3.19	(gm/cc)
	G	=	-41888.7	(J)	H	=	-31915	(J)	S	=	6.34	(J/K)	V	=	0.79	(cc)	Cp	=	3.22	(J/K)
Viscosity	of	the	System:	1.81	(log	10	poise)
System	mass	=	100.1	(gm)	density	=	2.61	(gm/cc)
	G	=	-1.68501e+06	(J)	H	=	-1.24087e+06	(J)	S	=	282.33	(J/K)	V	=	38.34	(cc)	Cp	=	154.13	(J/K)
Oxygen	delta	moles	=	1.03831e-05	delta	grams	=	0.000332246
	G	=	-3.79	(J)	H	=	0.45	(J)	S	=	0	(J/K)	V	=	1.36	(cc)	Cp	=	0	(J/K)
**********----------**********
Title:	Dummy	Title
T	=	1290	(C)	P	=	0.1	(kbars)	log(10)	f	O2	=	-7.34	delta	HM	=	-5.56	NNO	=	-0.75	QFM	=	0	COH	=	2.31	IW	=	3.36
Constraint	Flags:	fO2	path	=	QFM
Liquid	mass	=	96.45	(gm)	density	=	2.6	(gm/cc)	viscosity	=	1.85	(log	10	poise)	(analysis	in	wt	%)
	G	=	-1.62141e+06	(J)	H	=	-1.19657e+06	(J)	S	=	271.79	(J/K)	V	=	37.14	(cc)	Cp	=	148.85	(J/K)
	SiO2	TiO2	Al2O3	Fe2O3	Cr2O3	FeO	MnO	MgO	NiO	CoO	CaO	Na2O	K2O	P2O5	H2O	CO2	SO3	Cl2O-1	F2O-1
	50.3	0.23	18.19	1.23	0	7.24	0.15	11.25	0	0	8.51	2.27	0.11	0	0.52	0	0	0	0
olivine	mass	=	3.65	(gm)	density	=	3.2	(gm/cc)	(analysis	in	mole	%)
	(Ca0.00Mg0.89Fe''0.11Mn0.00Co0.00Ni0.00)2SiO4
	G	=	-60759.7	(J)	H	=	-46383.8	(J)	S	=	9.2	(J/K)	V	=	1.14	(cc)	Cp	=	4.67	(J/K)
	tephroite	fayalite	co-olivine	ni-olivine	monticellite	forsterite
	0.19	11.13	0	0	0.77	87.92
Total	solids	mass	=	3.65	(gm)	density	=	3.2	(gm/cc)
	G	=	-60759.7	(J)	H	=	-46383.8	(J)	S	=	9.2	(J/K)	V	=	1.14	(cc)	Cp	=	4.67	(J/K)
Viscosity	of	the	System:	1.9	(log	10	poise)
System	mass	=	100.1	(gm)	density	=	2.61	(gm/cc)
	G	=	-1.68217e+06	(J)	H	=	-1.24295e+06	(J)	S	=	280.99	(J/K)	V	=	38.28	(cc)	Cp	=	153.52	(J/K)
Oxygen	delta	moles	=	-3.01089e-05	delta	grams	=	-0.00096345
	G	=	10.92	(J)	H	=	-1.29	(J)	S	=	-0.01	(J/K)	V	=	-3.91	(cc)	Cp	=	0	(J/K)
**********----------**********
Title:	Dummy	Title
T	=	1280	(C)	P	=	0.1	(kbars)	log(10)	f	O2	=	-7.44	delta	HM	=	-5.57	NNO	=	-0.75	QFM	=	0	COH	=	2.3	IW	=	3.37
Constraint	Flags:	fO2	path	=	QFM
Liquid	mass	=	95.34	(gm)	density	=	2.6	(gm/cc)	viscosity	=	1.92	(log	10	poise)	(analysis	in	wt	%)
	G	=	-1.60048e+06	(J)	H	=	-1.18468e+06	(J)	S	=	267.71	(J/K)	V	=	36.74	(cc)	Cp	=	146.86	(J/K)
	SiO2	TiO2	Al2O3	Fe2O3	Cr2O3	FeO	MnO	MgO	NiO	CoO	CaO	Na2O	K2O	P2O5	H2O	CO2	SO3	Cl2O-1	F2O-1
	50.42	0.23	18.4	1.23	0	7.19	0.15	10.84	0	0	8.61	2.3	0.12	0	0.52	0	0	0	0
olivine	mass	=	4.76	(gm)	density	=	3.2	(gm/cc)	(analysis	in	mole	%)
	(Ca0.00Mg0.88Fe''0.11Mn0.00Co0.00Ni0.00)2SiO4
	G	=	-78861.5	(J)	H	=	-60320.5	(J)	S	=	11.94	(J/K)	V	=	1.49	(cc)	Cp	=	6.07	(J/K)
	tephroite	fayalite	co-olivine	ni-olivine	monticellite	forsterite
	0.19	11.47	0	0	0.78	87.56
Total	solids	mass	=	4.76	(gm)	density	=	3.2	(gm/cc)
	G	=	-78861.5	(J)	H	=	-60320.5	(J)	S	=	11.94	(J/K)	V	=	1.49	(cc)	Cp	=	6.07	(J/K)
Viscosity	of	the	System:	1.99	(log	10	poise)
System	mass	=	100.1	(gm)	density	=	2.62	(gm/cc)
	G	=	-1.67935e+06	(J)	H	=	-1.245e+06	(J)	S	=	279.65	(J/K)	V	=	38.22	(cc)	Cp	=	152.93	(J/K)
Oxygen	delta	moles	=	-7.16996e-05	delta	grams	=	-0.0022943
	G	=	25.83	(J)	H	=	-3.05	(J)	S	=	-0.02	(J/K)	V	=	-9.26	(cc)	Cp	=	0	(J/K)
**********----------**********
Title:	Dummy	Title
T	=	1270	(C)	P	=	0.1	(kbars)	log(10)	f	O2	=	-7.54	delta	HM	=	-5.57	NNO	=	-0.75	QFM	=	0	COH	=	2.29	IW	=	3.38
Constraint	Flags:	fO2	path	=	QFM
Liquid	mass	=	94.27	(gm)	density	=	2.59	(gm/cc)	viscosity	=	2	(log	10	poise)	(analysis	in	wt	%)
	G	=	-1.5803e+06	(J)	H	=	-1.17328e+06	(J)	S	=	263.76	(J/K)	V	=	36.35	(cc)	Cp	=	144.94	(J/K)
	SiO2	TiO2	Al2O3	Fe2O3	Cr2O3	FeO	MnO	MgO	NiO	CoO	CaO	Na2O	K2O	P2O5	H2O	CO2	SO3	Cl2O-1	F2O-1
	50.54	0.23	18.61	1.23	0	7.14	0.15	10.44	0	0	8.7	2.32	0.12	0	0.53	0	0	0	0
olivine	mass	=	5.82	(gm)	density	=	3.21	(gm/cc)	(analysis	in	mole	%)
	(Ca0.00Mg0.88Fe''0.12Mn0.00Co0.00Ni0.00)2SiO4
	G	=	-96231.9	(J)	H	=	-73750.4	(J)	S	=	14.57	(J/K)	V	=	1.82	(cc)	Cp	=	7.42	(J/K)
	tephroite	fayalite	co-olivine	ni-olivine	monticellite	forsterite
	0.2	11.82	0	0	0.8	87.19
Total	solids	mass	=	5.82	(gm)	density	=	3.21	(gm/cc)
	G	=	-96231.9	(J)	H	=	-73750.4	(J)	S	=	14.57	(J/K)	V	=	1.82	(cc)	Cp	=	7.42	(J/K)
Viscosity	of	the	System:	2.09	(log	10	poise)
System	mass	=	100.1	(gm)	density	=	2.62	(gm/cc)
	G	=	-1.67653e+06	(J)	H	=	-1.24703e+06	(J)	S	=	278.33	(J/K)	V	=	38.17	(cc)	Cp	=	152.37	(J/K)
Oxygen	delta	moles	=	-0.000114457	delta	grams	=	-0.00366248
	G	=	40.93	(J)	H	=	-4.83	(J)	S	=	-0.03	(J/K)	V	=	-14.69	(cc)	Cp	=	0	(J/K)
**********----------**********
Title:	Dummy	Title
T	=	1260	(C)	P	=	0.1	(kbars)	log(10)	f	O2	=	-7.65	delta	HM	=	-5.57	NNO	=	-0.74	QFM	=	0	COH	=	2.28	IW	=	3.39
Constraint	Flags:	fO2	path	=	QFM
Liquid	mass	=	93.23	(gm)	density	=	2.59	(gm/cc)	viscosity	=	2.08	(log	10	poise)	(analysis	in	wt	%)
	G	=	-1.56082e+06	(J)	H	=	-1.16232e+06	(J)	S	=	259.92	(J/K)	V	=	35.98	(cc)	Cp	=	143.09	(J/K)
	SiO2	TiO2	Al2O3	Fe2O3	Cr2O3	FeO	MnO	MgO	NiO	CoO	CaO	Na2O	K2O	P2O5	H2O	CO2	SO3	Cl2O-1	F2O-1
	50.65	0.24	18.81	1.23	0	7.08	0.15	10.04	0	0	8.79	2.35	0.12	0	0.54	0	0	0	0
olivine	mass	=	6.86	(gm)	density	=	3.21	(gm/cc)	(analysis	in	mole	%)
	(Ca0.00Mg0.88Fe''0.12Mn0.00Co0.00Ni0.00)2SiO4
	G	=	-112906	(J)	H	=	-86697.6	(J)	S	=	17.09	(J/K)	V	=	2.14	(cc)	Cp	=	8.72	(J/K)
	tephroite	fayalite	co-olivine	ni-olivine	monticellite	forsterite
	0.2	12.17	0	0	0.81	86.81
Total	solids	mass	=	6.86	(gm)	density	=	3.21	(gm/cc)
	G	=	-112906	(J)	H	=	-86697.6	(J)	S	=	17.09	(J/K)	V	=	2.14	(cc)	Cp	=	8.72	(J/K)
Viscosity	of	the	System:	2.18	(log	10	poise)
System	mass	=	100.09	(gm)	density	=	2.63	(gm/cc)
	G	=	-1.67373e+06	(J)	H	=	-1.24902e+06	(J)	S	=	277.02	(J/K)	V	=	38.11	(cc)	Cp	=	151.82	(J/K)
Oxygen	delta	moles	=	-0.000158449	delta	grams	=	-0.00507018
	G	=	56.26	(J)	H	=	-6.62	(J)	S	=	-0.04	(J/K)	V	=	-20.2	(cc)	Cp	=	-0.01	(J/K)
**********----------**********
Title:	Dummy	Title
T	=	1250	(C)	P	=	0.1	(kbars)	log(10)	f	O2	=	-7.75	delta	HM	=	-5.57	NNO	=	-0.74	QFM	=	0	COH	=	2.27	IW	=	3.4
Constraint	Flags:	fO2	path	=	QFM
Liquid	mass	=	92.23	(gm)	density	=	2.59	(gm/cc)	viscosity	=	2.16	(log	10	poise)	(analysis	in	wt	%)
	G	=	-1.54202e+06	(J)	H	=	-1.1518e+06	(J)	S	=	256.19	(J/K)	V	=	35.62	(cc)	Cp	=	141.31	(J/K)
	SiO2	TiO2	Al2O3	Fe2O3	Cr2O3	FeO	MnO	MgO	NiO	CoO	CaO	Na2O	K2O	P2O5	H2O	CO2	SO3	Cl2O-1	F2O-1
	50.77	0.24	19.02	1.22	0	7.02	0.15	9.66	0	0	8.89	2.37	0.12	0	0.54	0	0	0	0
olivine	mass	=	7.86	(gm)	density	=	3.22	(gm/cc)	(analysis	in	mole	%)
	(Ca0.00Mg0.87Fe''0.13Mn0.00Co0.00Ni0.00)2SiO4
	G	=	-128918	(J)	H	=	-99184.2	(J)	S	=	19.52	(J/K)	V	=	2.44	(cc)	Cp	=	9.98	(J/K)
	tephroite	fayalite	co-olivine	ni-olivine	monticellite	forsterite
	0.21	12.53	0	0	0.83	86.43
Total	solids	mass	=	7.86	(gm)	density	=	3.22	(gm/cc)
	G	=	-128918	(J)	H	=	-99184.2	(J)	S	=	19.52	(J/K)	V	=	2.44	(cc)	Cp	=	9.98	(J/K)
Viscosity	of	the	System:	2.28	(log	10	poise)
System	mass	=	100.09	(gm)	density	=	2.63	(gm/cc)
	G	=	-1.67094e+06	(J)	H	=	-1.25098e+06	(J)	S	=	275.71	(J/K)	V	=	38.06	(cc)	Cp	=	151.29	(J/K)
Oxygen	delta	moles	=	-0.000203747	delta	grams	=	-0.00651965
	G	=	71.81	(J)	H	=	-8.44	(J)	S	=	-0.05	(J/K)	V	=	-25.8	(cc)	Cp	=	-0.01	(J/K)
**********----------**********
Title:	Dummy	Title
T	=	1240	(C)	P	=	0.1	(kbars)	log(10)	f	O2	=	-7.86	delta	HM	=	-5.58	NNO	=	-0.74	QFM	=	0	COH	=	2.27	IW	=	3.41
Constraint	Flags:	fO2	path	=	QFM
Liquid	mass	=	91.25	(gm)	density	=	2.59	(gm/cc)	viscosity	=	2.24	(log	10	poise)	(analysis	in	wt	%)
	G	=	-1.52386e+06	(J)	H	=	-1.14169e+06	(J)	S	=	252.57	(J/K)	V	=	35.27	(cc)	Cp	=	139.59	(J/K)
	SiO2	TiO2	Al2O3	Fe2O3	Cr2O3	FeO	MnO	MgO	NiO	CoO	CaO	Na2O	K2O	P2O5	H2O	CO2	SO3	Cl2O-1	F2O-1
	50.89	0.24	19.22	1.22	0	6.95	0.14	9.29	0	0	8.98	2.4	0.12	0	0.55	0	0	0	0
olivine	mass	=	8.84	(gm)	density	=	3.22	(gm/cc)	(analysis	in	mole	%)
	(Ca0.00Mg0.87Fe''0.13Mn0.00Co0.00Ni0.00)2SiO4
	G	=	-144298	(J)	H	=	-111231	(J)	S	=	21.85	(J/K)	V	=	2.74	(cc)	Cp	=	11.19	(J/K)
	tephroite	fayalite	co-olivine	ni-olivine	monticellite	forsterite
	0.21	12.9	0	0	0.85	86.04
Total	solids	mass	=	8.84	(gm)	density	=	3.22	(gm/cc)
	G	=	-144298	(J)	H	=	-111231	(J)	S	=	21.85	(J/K)	V	=	2.74	(cc)	Cp	=	11.19	(J/K)
Viscosity	of	the	System:	2.38	(log	10	poise)
System	mass	=	100.09	(gm)	density	=	2.63	(gm/cc)
	G	=	-1.66816e+06	(J)	H	=	-1.25292e+06	(J)	S	=	274.42	(J/K)	V	=	38.01	(cc)	Cp	=	150.77	(J/K)
Oxygen	delta	moles	=	-0.00025042	delta	grams	=	-0.00801312
	G	=	87.62	(J)	H	=	-10.28	(J)	S	=	-0.06	(J/K)	V	=	-31.5	(cc)	Cp	=	-0.01	(J/K)
**********----------**********
Title:	Dummy	Title
T	=	1230	(C)	P	=	0.1	(kbars)	log(10)	f	O2	=	-7.96	delta	HM	=	-5.58	NNO	=	-0.74	QFM	=	0	COH	=	2.26	IW	=	3.42
Constraint	Flags:	fO2	path	=	QFM
Liquid	mass	=	90.31	(gm)	density	=	2.59	(gm/cc)	viscosity	=	2.32	(log	10	poise)	(analysis	in	wt	%)
	G	=	-1.50632e+06	(J)	H	=	-1.13198e+06	(J)	S	=	249.04	(J/K)	V	=	34.93	(cc)	Cp	=	137.92	(J/K)
	SiO2	TiO2	Al2O3	Fe2O3	Cr2O3	FeO	MnO	MgO	NiO	CoO	CaO	Na2O	K2O	P2O5	H2O	CO2	SO3	Cl2O-1	F2O-1
	51.01	0.24	19.42	1.22	0	6.87	0.14	8.93	0	0	9.07	2.43	0.12	0	0.55	0	0	0	0
olivine	mass	=	9.78	(gm)	density	=	3.23	(gm/cc)	(analysis	in	mole	%)
	(Ca0.00Mg0.87Fe''0.13Mn0.00Co0.00Ni0.00)2SiO4
	G	=	-159076	(J)	H	=	-122858	(J)	S	=	24.09	(J/K)	V	=	3.03	(cc)	Cp	=	12.35	(J/K)
	tephroite	fayalite	co-olivine	ni-olivine	monticellite	forsterite
	0.22	13.28	0	0	0.86	85.65
Total	solids	mass	=	9.78	(gm)	density	=	3.23	(gm/cc)
	G	=	-159076	(J)	H	=	-122858	(J)	S	=	24.09	(J/K)	V	=	3.03	(cc)	Cp	=	12.35	(J/K)
Viscosity	of	the	System:	2.47	(log	10	poise)
System	mass	=	100.09	(gm)	density	=	2.64	(gm/cc)
	G	=	-1.66539e+06	(J)	H	=	-1.25484e+06	(J)	S	=	273.13	(J/K)	V	=	37.96	(cc)	Cp	=	150.28	(J/K)
Oxygen	delta	moles	=	-0.000298537	delta	grams	=	-0.00955281
	G	=	103.68	(J)	H	=	-12.15	(J)	S	=	-0.08	(J/K)	V	=	-37.31	(cc)	Cp	=	-0.01	(J/K)
**********----------**********
Title:	Dummy	Title
T	=	1220	(C)	P	=	0.1	(kbars)	log(10)	f	O2	=	-8.07	delta	HM	=	-5.58	NNO	=	-0.74	QFM	=	0	COH	=	2.25	IW	=	3.43
Constraint	Flags:	fO2	path	=	QFM
Liquid	mass	=	89.39	(gm)	density	=	2.58	(gm/cc)	viscosity	=	2.4	(log	10	poise)	(analysis	in	wt	%)
	G	=	-1.48936e+06	(J)	H	=	-1.12265e+06	(J)	S	=	245.6	(J/K)	V	=	34.6	(cc)	Cp	=	136.32	(J/K)
	SiO2	TiO2	Al2O3	Fe2O3	Cr2O3	FeO	MnO	MgO	NiO	CoO	CaO	Na2O	K2O	P2O5	H2O	CO2	SO3	Cl2O-1	F2O-1
	51.13	0.25	19.62	1.21	0	6.78	0.14	8.58	0	0	9.16	2.45	0.12	0	0.56	0	0	0	0
olivine	mass	=	10.7	(gm)	density	=	3.24	(gm/cc)	(analysis	in	mole	%)
	(Ca0.00Mg0.86Fe''0.14Mn0.00Co0.00Ni0.00)2SiO4
	G	=	-173279	(J)	H	=	-134084	(J)	S	=	26.25	(J/K)	V	=	3.31	(cc)	Cp	=	13.48	(J/K)
	tephroite	fayalite	co-olivine	ni-olivine	monticellite	forsterite
	0.22	13.66	0	0	0.88	85.24
Total	solids	mass	=	10.7	(gm)	density	=	3.24	(gm/cc)
	G	=	-173279	(J)	H	=	-134084	(J)	S	=	26.25	(J/K)	V	=	3.31	(cc)	Cp	=	13.48	(J/K)
Viscosity	of	the	System:	2.57	(log	10	poise)
System	mass	=	100.09	(gm)	density	=	2.64	(gm/cc)
	G	=	-1.66264e+06	(J)	H	=	-1.25673e+06	(J)	S	=	271.85	(J/K)	V	=	37.91	(cc)	Cp	=	149.79	(J/K)
Oxygen	delta	moles	=	-0.000348165	delta	grams	=	-0.0111409
	G	=	120.02	(J)	H	=	-14.04	(J)	S	=	-0.09	(J/K)	V	=	-43.22	(cc)	Cp	=	-0.01	(J/K)
**********----------**********
Title:	Dummy	Title
T	=	1210	(C)	P	=	0.1	(kbars)	log(10)	f	O2	=	-8.18	delta	HM	=	-5.58	NNO	=	-0.73	QFM	=	0	COH	=	2.24	IW	=	3.44
Constraint	Flags:	fO2	path	=	QFM
Liquid	mass	=	88.5	(gm)	density	=	2.58	(gm/cc)	viscosity	=	2.49	(log	10	poise)	(analysis	in	wt	%)
	G	=	-1.47297e+06	(J)	H	=	-1.11367e+06	(J)	S	=	242.25	(J/K)	V	=	34.28	(cc)	Cp	=	134.76	(J/K)
	SiO2	TiO2	Al2O3	Fe2O3	Cr2O3	FeO	MnO	MgO	NiO	CoO	CaO	Na2O	K2O	P2O5	H2O	CO2	SO3	Cl2O-1	F2O-1
	51.25	0.25	19.82	1.2	0	6.69	0.14	8.24	0	0	9.24	2.47	0.12	0	0.56	0	0	0	0
olivine	mass	=	11.59	(gm)	density	=	3.24	(gm/cc)	(analysis	in	mole	%)
	(Ca0.00Mg0.86Fe''0.14Mn0.00Co0.00Ni0.00)2SiO4
	G	=	-186932	(J)	H	=	-144925	(J)	S	=	28.32	(J/K)	V	=	3.57	(cc)	Cp	=	14.57	(J/K)
	tephroite	fayalite	co-olivine	ni-olivine	monticellite	forsterite
	0.23	14.04	0	0	0.9	84.83
Total	solids	mass	=	11.59	(gm)	density	=	3.24	(gm/cc)
	G	=	-186932	(J)	H	=	-144925	(J)	S	=	28.32	(J/K)	V	=	3.57	(cc)	Cp	=	14.57	(J/K)
Viscosity	of	the	System:	2.67	(log	10	poise)
System	mass	=	100.09	(gm)	density	=	2.64	(gm/cc)
	G	=	-1.6599e+06	(J)	H	=	-1.2586e+06	(J)	S	=	270.57	(J/K)	V	=	37.86	(cc)	Cp	=	149.33	(J/K)
Oxygen	delta	moles	=	-0.000399371	delta	grams	=	-0.0127794
	G	=	136.64	(J)	H	=	-15.96	(J)	S	=	-0.1	(J/K)	V	=	-49.25	(cc)	Cp	=	-0.01	(J/K)
**********----------**********
Title:	Dummy	Title
T	=	1200	(C)	P	=	0.1	(kbars)	log(10)	f	O2	=	-8.29	delta	HM	=	-5.59	NNO	=	-0.73	QFM	=	0	COH	=	2.23	IW	=	3.45
Constraint	Flags:	fO2	path	=	QFM
Liquid	mass	=	87.63	(gm)	density	=	2.58	(gm/cc)	viscosity	=	2.57	(log	10	poise)	(analysis	in	wt	%)
	G	=	-1.45711e+06	(J)	H	=	-1.10502e+06	(J)	S	=	239	(J/K)	V	=	33.98	(cc)	Cp	=	129.76	(J/K)
	SiO2	TiO2	Al2O3	Fe2O3	Cr2O3	FeO	MnO	MgO	NiO	CoO	CaO	Na2O	K2O	P2O5	H2O	CO2	SO3	Cl2O-1	F2O-1
	51.37	0.25	20.02	1.2	0	6.59	0.14	7.91	0	0	9.33	2.5	0.13	0	0.57	0	0	0	0
olivine	mass	=	12.45	(gm)	density	=	3.25	(gm/cc)	(analysis	in	mole	%)
	(Ca0.00Mg0.85Fe''0.14Mn0.00Co0.00Ni0.00)2SiO4
	G	=	-200059	(J)	H	=	-155398	(J)	S	=	30.32	(J/K)	V	=	3.83	(cc)	Cp	=	15.62	(J/K)
	tephroite	fayalite	co-olivine	ni-olivine	monticellite	forsterite
	0.23	14.44	0	0	0.91	84.42
Total	solids	mass	=	12.45	(gm)	density	=	3.25	(gm/cc)
	G	=	-200059	(J)	H	=	-155398	(J)	S	=	30.32	(J/K)	V	=	3.83	(cc)	Cp	=	15.62	(J/K)
Viscosity	of	the	System:	2.77	(log	10	poise)
System	mass	=	100.09	(gm)	density	=	2.65	(gm/cc)
	G	=	-1.65717e+06	(J)	H	=	-1.26042e+06	(J)	S	=	269.32	(J/K)	V	=	37.81	(cc)	Cp	=	145.37	(J/K)
Oxygen	delta	moles	=	-0.000452213	delta	grams	=	-0.0144703
	G	=	153.55	(J)	H	=	-17.91	(J)	S	=	-0.12	(J/K)	V	=	-55.39	(cc)	Cp	=	-0.02	(J/K)
**********----------**********
Title:	Dummy	Title
T	=	1190	(C)	P	=	0.1	(kbars)	log(10)	f	O2	=	-8.41	delta	HM	=	-5.59	NNO	=	-0.73	QFM	=	0	COH	=	2.22	IW	=	3.46
Constraint	Flags:	fO2	path	=	QFM
Liquid	mass	=	80.8	(gm)	density	=	2.57	(gm/cc)	viscosity	=	2.68	(log	10	poise)	(analysis	in	wt	%)
	G	=	-1.3401e+06	(J)	H	=	-1.0184e+06	(J)	S	=	219.87	(J/K)	V	=	31.43	(cc)	Cp	=	119.13	(J/K)
	SiO2	TiO2	Al2O3	Fe2O3	Cr2O3	FeO	MnO	MgO	NiO	CoO	CaO	Na2O	K2O	P2O5	H2O	CO2	SO3	Cl2O-1	F2O-1
	51.91	0.27	19.75	1.23	0	6.71	0.14	7.49	0	0	9.15	2.59	0.14	0	0.62	0	0	0	0
olivine	mass	=	14.59	(gm)	density	=	3.26	(gm/cc)	(analysis	in	mole	%)
	(Ca0.00Mg0.84Fe''0.15Mn0.00Co0.00Ni0.00)2SiO4
	G	=	-232724	(J)	H	=	-181001	(J)	S	=	35.35	(J/K)	V	=	4.47	(cc)	Cp	=	18.22	(J/K)
	tephroite	fayalite	co-olivine	ni-olivine	monticellite	forsterite
	0.25	15.25	0	0	0.91	83.59
feldspar	mass	=	4.69	(gm)	density	=	2.67	(gm/cc)	(analysis	in	mole	%)
	K0.00Na0.18Ca0.82Al1.82Si2.18O8
	G	=	-81558.1	(J)	H	=	-64867.3	(J)	S	=	11.41	(J/K)	V	=	1.75	(cc)	Cp	=	5.78	(J/K)
	albite	anorthite	sanidine
	18.22	81.73	0.05
Total	solids	mass	=	19.28	(gm)	density	=	3.1	(gm/cc)
	G	=	-314282	(J)	H	=	-245868	(J)	S	=	46.76	(J/K)	V	=	6.23	(cc)	Cp	=	24	(J/K)
Viscosity	of	the	System:	3.03	(log	10	poise)
System	mass	=	100.08	(gm)	density	=	2.66	(gm/cc)
	G	=	-1.65438e+06	(J)	H	=	-1.26426e+06	(J)	S	=	266.63	(J/K)	V	=	37.65	(cc)	Cp	=	143.13	(J/K)
Oxygen	delta	moles	=	-0.00063296	delta	grams	=	-0.020254
	G	=	213.3	(J)	H	=	-24.84	(J)	S	=	-0.16	(J/K)	V	=	-77	(cc)	Cp	=	-0.02	(J/K)
**********----------**********
Title:	Dummy	Title
T	=	1180	(C)	P	=	0.1	(kbars)	log(10)	f	O2	=	-8.52	delta	HM	=	-5.59	NNO	=	-0.73	QFM	=	0	COH	=	2.21	IW	=	3.47
Constraint	Flags:	fO2	path	=	QFM
Liquid	mass	=	72.54	(gm)	density	=	2.56	(gm/cc)	viscosity	=	2.8	(log	10	poise)	(analysis	in	wt	%)
	G	=	-1.19955e+06	(J)	H	=	-913198	(J)	S	=	197.06	(J/K)	V	=	28.33	(cc)	Cp	=	106.4	(J/K)
	SiO2	TiO2	Al2O3	Fe2O3	Cr2O3	FeO	MnO	MgO	NiO	CoO	CaO	Na2O	K2O	P2O5	H2O	CO2	SO3	Cl2O-1	F2O-1
	52.65	0.3	19.3	1.26	0	6.89	0.15	7.04	0	0	8.86	2.7	0.15	0	0.69	0	0	0	0
olivine	mass	=	16.95	(gm)	density	=	3.27	(gm/cc)	(analysis	in	mole	%)
	(Ca0.00Mg0.83Fe''0.16Mn0.00Co0.00Ni0.00)2SiO4
	G	=	-268327	(J)	H	=	-208902	(J)	S	=	40.89	(J/K)	V	=	5.18	(cc)	Cp	=	21.09	(J/K)
	tephroite	fayalite	co-olivine	ni-olivine	monticellite	forsterite
	0.27	16.24	0	0	0.9	82.59
feldspar	mass	=	10.58	(gm)	density	=	2.67	(gm/cc)	(analysis	in	mole	%)
	K0.00Na0.19Ca0.80Al1.80Si2.20O8
	G	=	-183724	(J)	H	=	-146424	(J)	S	=	25.67	(J/K)	V	=	3.96	(cc)	Cp	=	13.02	(J/K)
	albite	anorthite	sanidine
	19.46	80.48	0.06
Total	solids	mass	=	27.54	(gm)	density	=	3.01	(gm/cc)
	G	=	-452051	(J)	H	=	-355325	(J)	S	=	66.56	(J/K)	V	=	9.14	(cc)	Cp	=	34.11	(J/K)
Viscosity	of	the	System:	3.38	(log	10	poise)
System	mass	=	100.07	(gm)	density	=	2.67	(gm/cc)
	G	=	-1.6516e+06	(J)	H	=	-1.26852e+06	(J)	S	=	263.62	(J/K)	V	=	37.47	(cc)	Cp	=	140.51	(J/K)
Oxygen	delta	moles	=	-0.000862669	delta	grams	=	-0.0276044
	G	=	288.49	(J)	H	=	-33.54	(J)	S	=	-0.22	(J/K)	V	=	-104.23	(cc)	Cp	=	-0.03	(J/K)
**********----------**********
Title:	Dummy	Title
T	=	1170	(C)	P	=	0.1	(kbars)	log(10)	f	O2	=	-8.64	delta	HM	=	-5.59	NNO	=	-0.72	QFM	=	0	COH	=	2.2	IW	=	3.48
Constraint	Flags:	fO2	path	=	QFM
Liquid	mass	=	65.54	(gm)	density	=	2.55	(gm/cc)	viscosity	=	2.91	(log	10	poise)	(analysis	in	wt	%)
	G	=	-1.08133e+06	(J)	H	=	-824783	(J)	S	=	177.77	(J/K)	V	=	25.72	(cc)	Cp	=	95.69	(J/K)
	SiO2	TiO2	Al2O3	Fe2O3	Cr2O3	FeO	MnO	MgO	NiO	CoO	CaO	Na2O	K2O	P2O5	H2O	CO2	SO3	Cl2O-1	F2O-1
	53.39	0.34	18.88	1.29	0	7	0.15	6.63	0	0	8.61	2.79	0.17	0	0.76	0	0	0	0
olivine	mass	=	18.98	(gm)	density	=	3.29	(gm/cc)	(analysis	in	mole	%)
	(Ca0.00Mg0.83Fe''0.17Mn0.00Co0.00Ni0.00)2SiO4
	G	=	-298019	(J)	H	=	-232267	(J)	S	=	45.56	(J/K)	V	=	5.78	(cc)	Cp	=	23.5	(J/K)
	tephroite	fayalite	co-olivine	ni-olivine	monticellite	forsterite
	0.29	17.21	0	0	0.89	81.62
feldspar	mass	=	15.54	(gm)	density	=	2.67	(gm/cc)	(analysis	in	mole	%)
	K0.00Na0.21Ca0.79Al1.79Si2.21O8
	G	=	-269500	(J)	H	=	-215227	(J)	S	=	37.61	(J/K)	V	=	5.82	(cc)	Cp	=	19.11	(J/K)
	albite	anorthite	sanidine
	20.62	79.32	0.06
Total	solids	mass	=	34.52	(gm)	density	=	2.98	(gm/cc)
	G	=	-567519	(J)	H	=	-447494	(J)	S	=	83.17	(J/K)	V	=	11.59	(cc)	Cp	=	42.61	(J/K)
Viscosity	of	the	System:	3.75	(log	10	poise)
System	mass	=	100.06	(gm)	density	=	2.68	(gm/cc)
	G	=	-1.64885e+06	(J)	H	=	-1.27228e+06	(J)	S	=	260.94	(J/K)	V	=	37.31	(cc)	Cp	=	138.3	(J/K)
Oxygen	delta	moles	=	-0.0010818	delta	grams	=	-0.0346163
	G	=	358.99	(J)	H	=	-41.66	(J)	S	=	-0.28	(J/K)	V	=	-129.8	(cc)	Cp	=	-0.04	(J/K)
**********----------**********
Title:	Dummy	Title
T	=	1160	(C)	P	=	0.1	(kbars)	log(10)	f	O2	=	-8.76	delta	HM	=	-5.6	NNO	=	-0.72	QFM	=	0	COH	=	2.19	IW	=	3.5
Constraint	Flags:	fO2	path	=	QFM
Liquid	mass	=	59.55	(gm)	density	=	2.54	(gm/cc)	viscosity	=	3.03	(log	10	poise)	(analysis	in	wt	%)
	G	=	-980656	(J)	H	=	-749537	(J)	S	=	161.27	(J/K)	V	=	23.48	(cc)	Cp	=	86.57	(J/K)
	SiO2	TiO2	Al2O3	Fe2O3	Cr2O3	FeO	MnO	MgO	NiO	CoO	CaO	Na2O	K2O	P2O5	H2O	CO2	SO3	Cl2O-1	F2O-1
	54.14	0.37	18.47	1.31	0	7.04	0.15	6.24	0	0	8.39	2.87	0.18	0	0.84	0	0	0	0
olivine	mass	=	20.74	(gm)	density	=	3.3	(gm/cc)	(analysis	in	mole	%)
	(Ca0.00Mg0.82Fe''0.18Mn0.00Co0.00Ni0.00)2SiO4
	G	=	-323093	(J)	H	=	-252096	(J)	S	=	49.54	(J/K)	V	=	6.29	(cc)	Cp	=	25.57	(J/K)
	tephroite	fayalite	co-olivine	ni-olivine	monticellite	forsterite
	0.31	18.14	0	0	0.87	80.68
feldspar	mass	=	19.77	(gm)	density	=	2.67	(gm/cc)	(analysis	in	mole	%)
	K0.00Na0.22Ca0.78Al1.78Si2.22O8
	G	=	-342387	(J)	H	=	-274004	(J)	S	=	47.72	(J/K)	V	=	7.41	(cc)	Cp	=	24.29	(J/K)
	albite	anorthite	sanidine
	21.68	78.25	0.07
Total	solids	mass	=	40.51	(gm)	density	=	2.96	(gm/cc)
	G	=	-665481	(J)	H	=	-526101	(J)	S	=	97.25	(J/K)	V	=	13.69	(cc)	Cp	=	49.86	(J/K)
Viscosity	of	the	System:	4.19	(log	10	poise)
System	mass	=	100.06	(gm)	density	=	2.69	(gm/cc)
	G	=	-1.64614e+06	(J)	H	=	-1.27564e+06	(J)	S	=	258.52	(J/K)	V	=	37.17	(cc)	Cp	=	136.43	(J/K)
Oxygen	delta	moles	=	-0.00129118	delta	grams	=	-0.0413162
	G	=	425.16	(J)	H	=	-49.25	(J)	S	=	-0.33	(J/K)	V	=	-153.85	(cc)	Cp	=	-0.05	(J/K)
**********----------**********
Title:	Dummy	Title
T	=	1150	(C)	P	=	0.1	(kbars)	log(10)	f	O2	=	-8.88	delta	HM	=	-5.6	NNO	=	-0.72	QFM	=	0	COH	=	2.18	IW	=	3.51
Constraint	Flags:	fO2	path	=	QFM
Liquid	mass	=	52.29	(gm)	density	=	2.53	(gm/cc)	viscosity	=	3.19	(log	10	poise)	(analysis	in	wt	%)
	G	=	-859323	(J)	H	=	-658485	(J)	S	=	141.12	(J/K)	V	=	20.7	(cc)	Cp	=	75.57	(J/K)
	SiO2	TiO2	Al2O3	Fe2O3	Cr2O3	FeO	MnO	MgO	NiO	CoO	CaO	Na2O	K2O	P2O5	H2O	CO2	SO3	Cl2O-1	F2O-1
	55.2	0.42	17.89	1.33	0	7.07	0.15	5.83	0	0	8.12	2.92	0.2	0	0.86	0	0	0	0
olivine	mass	=	22.73	(gm)	density	=	3.31	(gm/cc)	(analysis	in	mole	%)
	(Ca0.00Mg0.80Fe''0.19Mn0.00Co0.00Ni0.00)2SiO4
	G	=	-350907	(J)	H	=	-274015	(J)	S	=	54.03	(J/K)	V	=	6.86	(cc)	Cp	=	27.89	(J/K)
	tephroite	fayalite	co-olivine	ni-olivine	monticellite	forsterite
	0.33	19.31	0	0	0.86	79.49
feldspar	mass	=	24.97	(gm)	density	=	2.67	(gm/cc)	(analysis	in	mole	%)
	K0.00Na0.23Ca0.76Al1.76Si2.24O8
	G	=	-431848	(J)	H	=	-346271	(J)	S	=	60.13	(J/K)	V	=	9.36	(cc)	Cp	=	30.66	(J/K)
	albite	anorthite	sanidine
	23.43	76.49	0.08
water	mass	=	0.05	(gm)	density	=	0.02	(gm/cc)
	H2O
	G	=	-1332.93	(J)	H	=	-531.23	(J)	S	=	0.56	(J/K)	V	=	3.18	(cc)	Cp	=	0.13	(J/K)
Total	solids	mass	=	47.76	(gm)	density	=	2.46	(gm/cc)
	G	=	-784088	(J)	H	=	-620817	(J)	S	=	114.72	(J/K)	V	=	19.4	(cc)	Cp	=	58.67	(J/K)
Viscosity	of	the	System:	6.17	(log	10	poise)
System	mass	=	100.05	(gm)	density	=	2.5	(gm/cc)
	G	=	-1.64341e+06	(J)	H	=	-1.2793e+06	(J)	S	=	255.85	(J/K)	V	=	40.1	(cc)	Cp	=	134.25	(J/K)
Oxygen	delta	moles	=	-0.00156159	delta	grams	=	-0.0499689
	G	=	510.2	(J)	H	=	-59	(J)	S	=	-0.4	(J/K)	V	=	-184.77	(cc)	Cp	=	-0.06	(J/K)
**********----------**********
Title:	Dummy	Title
T	=	1140	(C)	P	=	0.1	(kbars)	log(10)	f	O2	=	-9	delta	HM	=	-5.6	NNO	=	-0.72	QFM	=	0	COH	=	2.17	IW	=	3.52
Constraint	Flags:	fO2	path	=	QFM
Liquid	mass	=	39.22	(gm)	density	=	2.53	(gm/cc)	viscosity	=	3.28	(log	10	poise)	(analysis	in	wt	%)
	G	=	-640446	(J)	H	=	-491378	(J)	S	=	105.49	(J/K)	V	=	15.52	(cc)	Cp	=	56.33	(J/K)
	SiO2	TiO2	Al2O3	Fe2O3	Cr2O3	FeO	MnO	MgO	NiO	CoO	CaO	Na2O	K2O	P2O5	H2O	CO2	SO3	Cl2O-1	F2O-1
	55.68	0.55	17.17	1.43	0	7.51	0.18	5.4	0	0	7.83	3.13	0.26	0	0.87	0	0	0	0
olivine	mass	=	20.95	(gm)	density	=	3.34	(gm/cc)	(analysis	in	mole	%)
	(Ca0.00Mg0.79Fe''0.21Mn0.00Co0.00Ni0.00)2SiO4
	G	=	-319027	(J)	H	=	-249097	(J)	S	=	49.48	(J/K)	V	=	6.28	(cc)	Cp	=	25.51	(J/K)
	tephroite	fayalite	co-olivine	ni-olivine	monticellite	forsterite
	0.42	21.05	0	0	0.88	77.66
orthopyroxene	mass	=	6.85	(gm)	density	=	3.25	(gm/cc)	(analysis	in	mole	%)
	opx	Na0.00Ca0.06Fe''0.37Mg1.51Fe'''0.02Ti0.00Al0.10Si1.94O6
	G	=	-109360	(J)	H	=	-86324.8	(J)	S	=	16.3	(J/K)	V	=	2.11	(cc)	Cp	=	8.58	(J/K)
	diopside	clinoenstatit	hedenbergite	alumino-buffo	buffonite	essenite	jadeite
	-36.96	93.95	36.65	4.26	-3.98	5.97	0.11
feldspar	mass	=	32.86	(gm)	density	=	2.66	(gm/cc)	(analysis	in	mole	%)
	K0.00Na0.26Ca0.74Al1.74Si2.26O8
	G	=	-567515	(J)	H	=	-455879	(J)	S	=	79	(J/K)	V	=	12.34	(cc)	Cp	=	40.32	(J/K)
	albite	anorthite	sanidine
	25.88	74	0.12
water	mass	=	0.16	(gm)	density	=	0.02	(gm/cc)
	H2O
	G	=	-4372.96	(J)	H	=	-1754.37	(J)	S	=	1.85	(J/K)	V	=	10.39	(cc)	Cp	=	0.42	(J/K)
Total	solids	mass	=	60.82	(gm)	density	=	1.95	(gm/cc)
	G	=	-1.00027e+06	(J)	H	=	-793056	(J)	S	=	146.64	(J/K)	V	=	31.11	(cc)	Cp	=	74.83	(J/K)
Viscosity	of	the	System	cannot	be	computed.
System	mass	=	100.04	(gm)	density	=	2.15	(gm/cc)
	G	=	-1.64072e+06	(J)	H	=	-1.28443e+06	(J)	S	=	252.12	(J/K)	V	=	46.63	(cc)	Cp	=	131.15	(J/K)
Oxygen	delta	moles	=	-0.0018234	delta	grams	=	-0.0583466
	G	=	591.08	(J)	H	=	-68.23	(J)	S	=	-0.47	(J/K)	V	=	-214.24	(cc)	Cp	=	-0.07	(J/K)
**********----------**********
Title:	Dummy	Title
T	=	1130	(C)	P	=	0.1	(kbars)	log(10)	f	O2	=	-9.12	delta	HM	=	-5.61	NNO	=	-0.71	QFM	=	0	COH	=	2.15	IW	=	3.53
Constraint	Flags:	fO2	path	=	QFM
Liquid	mass	=	26.53	(gm)	density	=	2.53	(gm/cc)	viscosity	=	3.3	(log	10	poise)	(analysis	in	wt	%)
	G	=	-429648	(J)	H	=	-329814	(J)	S	=	71.15	(J/K)	V	=	10.47	(cc)	Cp	=	37.9	(J/K)
	SiO2	TiO2	Al2O3	Fe2O3	Cr2O3	FeO	MnO	MgO	NiO	CoO	CaO	Na2O	K2O	P2O5	H2O	CO2	SO3	Cl2O-1	F2O-1
	55.66	0.79	16.42	1.57	0	8.1	0.22	5	0	0	7.63	3.38	0.37	0	0.87	0	0	0	0
olivine	mass	=	18.22	(gm)	density	=	3.36	(gm/cc)	(analysis	in	mole	%)
	(Ca0.00Mg0.77Fe''0.23Mn0.01Co0.00Ni0.00)2SiO4
	G	=	-273466	(J)	H	=	-213440	(J)	S	=	42.78	(J/K)	V	=	5.42	(cc)	Cp	=	22.01	(J/K)
	tephroite	fayalite	co-olivine	ni-olivine	monticellite	forsterite
	0.55	22.94	0	0	0.92	75.58
orthopyroxene	mass	=	14.81	(gm)	density	=	3.27	(gm/cc)	(analysis	in	mole	%)
	opx	Na0.00Ca0.06Fe''0.39Mg1.48Fe'''0.02Ti0.00Al0.10Si1.94O6
	G	=	-234396	(J)	H	=	-185225	(J)	S	=	35.04	(J/K)	V	=	4.54	(cc)	Cp	=	18.46	(J/K)
	diopside	clinoenstatit	hedenbergite	alumino-buffo	buffonite	essenite	jadeite
	-39.1	93.42	39.5	4.02	-3.66	5.7	0.13
feldspar	mass	=	40.2	(gm)	density	=	2.66	(gm/cc)	(analysis	in	mole	%)
	K0.00Na0.28Ca0.71Al1.71Si2.29O8
	G	=	-693207	(J)	H	=	-557852	(J)	S	=	96.46	(J/K)	V	=	15.12	(cc)	Cp	=	49.29	(J/K)
	albite	anorthite	sanidine
	28.38	71.45	0.18
water	mass	=	0.27	(gm)	density	=	0.02	(gm/cc)
	H2O
	G	=	-7355.08	(J)	H	=	-2970.33	(J)	S	=	3.13	(J/K)	V	=	17.42	(cc)	Cp	=	0.7	(J/K)
Total	solids	mass	=	73.5	(gm)	density	=	1.73	(gm/cc)
	G	=	-1.20842e+06	(J)	H	=	-959487	(J)	S	=	177.41	(J/K)	V	=	42.49	(cc)	Cp	=	90.46	(J/K)
Viscosity	of	the	System	cannot	be	computed.
System	mass	=	100.03	(gm)	density	=	1.89	(gm/cc)
	G	=	-1.63807e+06	(J)	H	=	-1.2893e+06	(J)	S	=	248.56	(J/K)	V	=	52.97	(cc)	Cp	=	128.36	(J/K)
Oxygen	delta	moles	=	-0.00208143	delta	grams	=	-0.0666033
	G	=	669.4	(J)	H	=	-77.13	(J)	S	=	-0.53	(J/K)	V	=	-242.82	(cc)	Cp	=	-0.08	(J/K)
**********----------**********
Title:	Dummy	Title
T	=	1120	(C)	P	=	0.1	(kbars)	log(10)	f	O2	=	-9.25	delta	HM	=	-5.61	NNO	=	-0.71	QFM	=	0	COH	=	2.14	IW	=	3.54
Constraint	Flags:	fO2	path	=	QFM
Liquid	mass	=	17.94	(gm)	density	=	2.54	(gm/cc)	viscosity	=	3.33	(log	10	poise)	(analysis	in	wt	%)
	G	=	-288453	(J)	H	=	-221673	(J)	S	=	47.93	(J/K)	V	=	7.06	(cc)	Cp	=	25.51	(J/K)
	SiO2	TiO2	Al2O3	Fe2O3	Cr2O3	FeO	MnO	MgO	NiO	CoO	CaO	Na2O	K2O	P2O5	H2O	CO2	SO3	Cl2O-1	F2O-1
	55.62	1.13	15.71	1.67	0	8.46	0.25	4.69	0	0	7.59	3.51	0.5	0	0.87	0	0	0	0
olivine	mass	=	16.8	(gm)	density	=	3.38	(gm/cc)	(analysis	in	mole	%)
	(Ca0.00Mg0.75Fe''0.25Mn0.01Co0.00Ni0.00)2SiO4
	G	=	-249008	(J)	H	=	-194373	(J)	S	=	39.22	(J/K)	V	=	4.97	(cc)	Cp	=	20.16	(J/K)
	tephroite	fayalite	co-olivine	ni-olivine	monticellite	forsterite
	0.69	24.52	0	0	0.97	73.82
orthopyroxene	mass	=	19.71	(gm)	density	=	3.28	(gm/cc)	(analysis	in	mole	%)
	opx	Na0.00Ca0.07Fe''0.42Mg1.45Fe'''0.02Ti0.00Al0.09Si1.94O6
	G	=	-309746	(J)	H	=	-245109	(J)	S	=	46.4	(J/K)	V	=	6.02	(cc)	Cp	=	24.47	(J/K)
	diopside	clinoenstatit	hedenbergite	alumino-buffo	buffonite	essenite	jadeite
	-40.55	92.79	41.77	3.8	-3.33	5.38	0.13
feldspar	mass	=	45.23	(gm)	density	=	2.65	(gm/cc)	(analysis	in	mole	%)
	K0.00Na0.30Ca0.69Al1.69Si2.31O8
	G	=	-778883	(J)	H	=	-627991	(J)	S	=	108.31	(J/K)	V	=	17.04	(cc)	Cp	=	55.42	(J/K)
	albite	anorthite	sanidine
	30.36	69.39	0.26
water	mass	=	0.34	(gm)	density	=	0.02	(gm/cc)
	H2O
	G	=	-9370.65	(J)	H	=	-3809.41	(J)	S	=	3.99	(J/K)	V	=	22.12	(cc)	Cp	=	0.9	(J/K)
Total	solids	mass	=	82.09	(gm)	density	=	1.64	(gm/cc)
	G	=	-1.34701e+06	(J)	H	=	-1.07128e+06	(J)	S	=	197.91	(J/K)	V	=	50.14	(cc)	Cp	=	100.94	(J/K)
Viscosity	of	the	System	cannot	be	computed.
System	mass	=	100.03	(gm)	density	=	1.75	(gm/cc)
	G	=	-1.63546e+06	(J)	H	=	-1.29296e+06	(J)	S	=	245.85	(J/K)	V	=	57.2	(cc)	Cp	=	126.45	(J/K)
Oxygen	delta	moles	=	-0.00232849	delta	grams	=	-0.074509
	G	=	742.9	(J)	H	=	-85.44	(J)	S	=	-0.59	(J/K)	V	=	-269.71	(cc)	Cp	=	-0.08	(J/K)
**********----------**********
Title:	Dummy	Title
T	=	1110	(C)	P	=	0.1	(kbars)	log(10)	f	O2	=	-9.37	delta	HM	=	-5.61	NNO	=	-0.71	QFM	=	0	COH	=	2.13	IW	=	3.56
Constraint	Flags:	fO2	path	=	QFM
Liquid	mass	=	12.11	(gm)	density	=	2.55	(gm/cc)	viscosity	=	3.36	(log	10	poise)	(analysis	in	wt	%)
	G	=	-193566	(J)	H	=	-149002	(J)	S	=	32.22	(J/K)	V	=	4.75	(cc)	Cp	=	17.16	(J/K)
	SiO2	TiO2	Al2O3	Fe2O3	Cr2O3	FeO	MnO	MgO	NiO	CoO	CaO	Na2O	K2O	P2O5	H2O	CO2	SO3	Cl2O-1	F2O-1
	55.5	1.61	15.09	1.74	0	8.6	0.28	4.45	0	0	7.68	3.53	0.66	0	0.86	0	0	0	0
olivine	mass	=	16.05	(gm)	density	=	3.4	(gm/cc)	(analysis	in	mole	%)
	(Ca0.01Mg0.73Fe''0.26Mn0.01Co0.00Ni0.00)2SiO4
	G	=	-235490	(J)	H	=	-183949	(J)	S	=	37.26	(J/K)	V	=	4.72	(cc)	Cp	=	19.15	(J/K)
	tephroite	fayalite	co-olivine	ni-olivine	monticellite	forsterite
	0.8	25.73	0	0	1.02	72.45
orthopyroxene	mass	=	22.81	(gm)	density	=	3.28	(gm/cc)	(analysis	in	mole	%)
	opx	Na0.00Ca0.08Fe''0.43Mg1.43Fe'''0.02Ti0.00Al0.09Si1.94O6
	G	=	-356400	(J)	H	=	-282507	(J)	S	=	53.42	(J/K)	V	=	6.95	(cc)	Cp	=	28.21	(J/K)
	diopside	clinoenstatit	hedenbergite	alumino-buffo	buffonite	essenite	jadeite
	-41.33	92.1	43.44	3.62	-3.03	5.05	0.14
feldspar	mass	=	48.66	(gm)	density	=	2.65	(gm/cc)	(analysis	in	mole	%)
	K0.00Na0.32Ca0.68Al1.68Si2.32O8
	G	=	-836711	(J)	H	=	-675956	(J)	S	=	116.22	(J/K)	V	=	18.35	(cc)	Cp	=	59.57	(J/K)
	albite	anorthite	sanidine
	31.85	67.8	0.35
water	mass	=	0.4	(gm)	density	=	0.02	(gm/cc)
	H2O
	G	=	-10725.4	(J)	H	=	-4389.08	(J)	S	=	4.58	(J/K)	V	=	25.23	(cc)	Cp	=	1.03	(J/K)
Total	solids	mass	=	87.91	(gm)	density	=	1.59	(gm/cc)
	G	=	-1.43933e+06	(J)	H	=	-1.1468e+06	(J)	S	=	211.49	(J/K)	V	=	55.25	(cc)	Cp	=	107.96	(J/K)
Viscosity	of	the	System	cannot	be	computed.
System	mass	=	100.02	(gm)	density	=	1.67	(gm/cc)
	G	=	-1.63289e+06	(J)	H	=	-1.2958e+06	(J)	S	=	243.71	(J/K)	V	=	60	(cc)	Cp	=	125.11	(J/K)
Oxygen	delta	moles	=	-0.00254173	delta	grams	=	-0.0813322
	G	=	804.45	(J)	H	=	-92.34	(J)	S	=	-0.65	(J/K)	V	=	-292.3	(cc)	Cp	=	-0.09	(J/K)
**********----------**********
Title:	Dummy	Title
T	=	1100	(C)	P	=	0.1	(kbars)	log(10)	f	O2	=	-9.5	delta	HM	=	-5.61	NNO	=	-0.71	QFM	=	0	COH	=	2.12	IW	=	3.57
Constraint	Flags:	fO2	path	=	QFM
Liquid	mass	=	7.26	(gm)	density	=	2.55	(gm/cc)	viscosity	=	3.43	(log	10	poise)	(analysis	in	wt	%)
	G	=	-115870	(J)	H	=	-89446.9	(J)	S	=	19.24	(J/K)	V	=	2.85	(cc)	Cp	=	10.26	(J/K)
	SiO2	TiO2	Al2O3	Fe2O3	Cr2O3	FeO	MnO	MgO	NiO	CoO	CaO	Na2O	K2O	P2O5	H2O	CO2	SO3	Cl2O-1	F2O-1
	55.34	2.37	15.05	1.7	0	8.27	0.31	4.2	0	0	7.55	3.43	0.93	0	0.85	0	0	0	0
olivine	mass	=	15.34	(gm)	density	=	3.41	(gm/cc)	(analysis	in	mole	%)
	(Ca0.00Mg0.73Fe''0.26Mn0.01Co0.00Ni0.00)2SiO4
	G	=	-223593	(J)	H	=	-174923	(J)	S	=	35.44	(J/K)	V	=	4.5	(cc)	Cp	=	18.23	(J/K)
	tephroite	fayalite	co-olivine	ni-olivine	monticellite	forsterite
	0.92	26.39	0	0	1	71.69
orthopyroxene	mass	=	20.05	(gm)	density	=	3.29	(gm/cc)	(analysis	in	mole	%)
	opx	Na0.00Ca0.08Fe''0.44Mg1.42Fe'''0.02Ti0.00Al0.09Si1.94O6
	G	=	-312128	(J)	H	=	-247928	(J)	S	=	46.75	(J/K)	V	=	6.1	(cc)	Cp	=	24.74	(J/K)
	diopside	clinoenstatit	hedenbergite	alumino-buffo	buffonite	essenite	jadeite
	-42.51	92.23	44.3	3.78	-2.93	4.99	0.15
clinopyroxene	mass	=	5.86	(gm)	density	=	3.29	(gm/cc)	(analysis	in	mole	%)
	cpx	Na0.00Ca0.18Fe''0.47Mg1.25Fe'''0.03Ti0.01Al0.13Si1.92O6
	G	=	-90088.7	(J)	H	=	-71327.3	(J)	S	=	13.66	(J/K)	V	=	1.78	(cc)	Cp	=	7.1	(J/K)
	diopside	clinoenstatit	hedenbergite	alumino-buffo	buffonite	essenite	jadeite
	-37.42	81.06	47.45	5.37	-3.78	6.88	0.44
feldspar	mass	=	51.07	(gm)	density	=	2.65	(gm/cc)	(analysis	in	mole	%)
	K0.00Na0.33Ca0.66Al1.66Si2.34O8
	G	=	-876894	(J)	H	=	-709820	(J)	S	=	121.67	(J/K)	V	=	19.27	(cc)	Cp	=	62.47	(J/K)
	albite	anorthite	sanidine
	33.33	66.19	0.49
water	mass	=	0.44	(gm)	density	=	0.02	(gm/cc)
	H2O
	G	=	-11821.2	(J)	H	=	-4869.62	(J)	S	=	5.06	(J/K)	V	=	27.72	(cc)	Cp	=	1.14	(J/K)
Total	solids	mass	=	92.76	(gm)	density	=	1.56	(gm/cc)
	G	=	-1.51452e+06	(J)	H	=	-1.20887e+06	(J)	S	=	222.6	(J/K)	V	=	59.37	(cc)	Cp	=	113.68	(J/K)
Viscosity	of	the	System	cannot	be	computed.
System	mass	=	100.01	(gm)	density	=	1.61	(gm/cc)
	G	=	-1.63039e+06	(J)	H	=	-1.29831e+06	(J)	S	=	241.84	(J/K)	V	=	62.22	(cc)	Cp	=	123.95	(J/K)
Oxygen	delta	moles	=	-0.00266716	delta	grams	=	-0.085346
	G	=	837.35	(J)	H	=	-95.93	(J)	S	=	-0.68	(J/K)	V	=	-304.5	(cc)	Cp	=	-0.1	(J/K)
**********----------**********
Title:	Dummy	Title
T	=	1090	(C)	P	=	0.1	(kbars)	log(10)	f	O2	=	-9.63	delta	HM	=	-5.62	NNO	=	-0.7	QFM	=	0	COH	=	2.11	IW	=	3.58
Constraint	Flags:	fO2	path	=	QFM
Liquid	mass	=	3.9	(gm)	density	=	2.55	(gm/cc)	viscosity	=	3.53	(log	10	poise)	(analysis	in	wt	%)
	G	=	-62267.9	(J)	H	=	-48228.4	(J)	S	=	10.3	(J/K)	V	=	1.53	(cc)	Cp	=	5.51	(J/K)
	SiO2	TiO2	Al2O3	Fe2O3	Cr2O3	FeO	MnO	MgO	NiO	CoO	CaO	Na2O	K2O	P2O5	H2O	CO2	SO3	Cl2O-1	F2O-1
	55.21	3.18	15.1	1.62	0	7.74	0.34	3.96	0	0	7.49	3.24	1.29	0	0.83	0	0	0	0
olivine	mass	=	14.76	(gm)	density	=	3.42	(gm/cc)	(analysis	in	mole	%)
	(Ca0.00Mg0.72Fe''0.27Mn0.01Co0.00Ni0.00)2SiO4
	G	=	-214126	(J)	H	=	-167827	(J)	S	=	33.96	(J/K)	V	=	4.32	(cc)	Cp	=	17.5	(J/K)
	tephroite	fayalite	co-olivine	ni-olivine	monticellite	forsterite
	1.03	26.83	0	0	0.97	71.16
orthopyroxene	mass	=	18.64	(gm)	density	=	3.29	(gm/cc)	(analysis	in	mole	%)
	opx	Na0.00Ca0.08Fe''0.45Mg1.42Fe'''0.02Ti0.01Al0.09Si1.94O6
	G	=	-289379	(J)	H	=	-230368	(J)	S	=	43.29	(J/K)	V	=	5.66	(cc)	Cp	=	22.97	(J/K)
	diopside	clinoenstatit	hedenbergite	alumino-buffo	buffonite	essenite	jadeite
	-43.32	92.31	44.87	3.93	-2.84	4.9	0.15
clinopyroxene	mass	=	9.46	(gm)	density	=	3.3	(gm/cc)	(analysis	in	mole	%)
	cpx	Na0.00Ca0.19Fe''0.48Mg1.24Fe'''0.03Ti0.01Al0.13Si1.91O6
	G	=	-144850	(J)	H	=	-114948	(J)	S	=	21.94	(J/K)	V	=	2.87	(cc)	Cp	=	11.43	(J/K)
	diopside	clinoenstatit	hedenbergite	alumino-buffo	buffonite	essenite	jadeite
	-37.68	80.56	47.82	5.69	-3.6	6.74	0.47
feldspar	mass	=	52.73	(gm)	density	=	2.65	(gm/cc)	(analysis	in	mole	%)
	K0.01Na0.34Ca0.65Al1.65Si2.35O8
	G	=	-904241	(J)	H	=	-733466	(J)	S	=	125.28	(J/K)	V	=	19.91	(cc)	Cp	=	64.45	(J/K)
	albite	anorthite	sanidine
	34.27	65.08	0.65
rhm-oxide	mass	=	0.05	(gm)	density	=	4.4	(gm/cc)	(analysis	in	mole	%)
	Mn0.02Fe''0.54Mg0.29Fe'''0.16Al0.15Ti0.85O3
	G	=	-527.98	(J)	H	=	-395.32	(J)	S	=	0.1	(J/K)	V	=	0.01	(cc)	Cp	=	0.05	(J/K)
	geikielite	hematite	ilmenite	pyrophanite	corundum
	28.88	7.77	53.75	2.33	7.26
water	mass	=	0.47	(gm)	density	=	0.02	(gm/cc)
	H2O
	G	=	-12548	(J)	H	=	-5203.32	(J)	S	=	5.39	(J/K)	V	=	29.33	(cc)	Cp	=	1.21	(J/K)
Total	solids	mass	=	96.11	(gm)	density	=	1.55	(gm/cc)
	G	=	-1.56567e+06	(J)	H	=	-1.25221e+06	(J)	S	=	229.96	(J/K)	V	=	62.1	(cc)	Cp	=	117.6	(J/K)
Viscosity	of	the	System	cannot	be	computed.
System	mass	=	100.01	(gm)	density	=	1.57	(gm/cc)
	G	=	-1.62794e+06	(J)	H	=	-1.30044e+06	(J)	S	=	240.26	(J/K)	V	=	63.63	(cc)	Cp	=	123.1	(J/K)
Oxygen	delta	moles	=	-0.00274296	delta	grams	=	-0.0877715
	G	=	854.16	(J)	H	=	-97.67	(J)	S	=	-0.7	(J/K)	V	=	-310.88	(cc)	Cp	=	-0.1	(J/K)
**********----------**********
Title:	Dummy	Title
T	=	1080	(C)	P	=	0.1	(kbars)	log(10)	f	O2	=	-9.76	delta	HM	=	-5.62	NNO	=	-0.7	QFM	=	0	COH	=	2.1	IW	=	3.6
Constraint	Flags:	fO2	path	=	QFM
Liquid	mass	=	0.46	(gm)	density	=	2.5	(gm/cc)	viscosity	=	3.92	(log	10	poise)	(analysis	in	wt	%)
	G	=	-7474.41	(J)	H	=	-5821.51	(J)	S	=	1.22	(J/K)	V	=	0.19	(cc)	Cp	=	0.65	(J/K)
	SiO2	TiO2	Al2O3	Fe2O3	Cr2O3	FeO	MnO	MgO	NiO	CoO	CaO	Na2O	K2O	P2O5	H2O	CO2	SO3	Cl2O-1	F2O-1
	57.1	2.94	15.64	1.35	0	6.18	0.33	3.34	0	0	6.81	3.21	2.25	0	0.85	0	0	0	0
olivine	mass	=	14.04	(gm)	density	=	3.43	(gm/cc)	(analysis	in	mole	%)
	(Ca0.00Mg0.72Fe''0.27Mn0.01Co0.00Ni0.00)2SiO4
	G	=	-202672	(J)	H	=	-159147	(J)	S	=	32.17	(J/K)	V	=	4.1	(cc)	Cp	=	16.6	(J/K)
	tephroite	fayalite	co-olivine	ni-olivine	monticellite	forsterite
	1.16	27.25	0	0	0.97	70.63
orthopyroxene	mass	=	19.21	(gm)	density	=	3.3	(gm/cc)	(analysis	in	mole	%)
	opx	Na0.00Ca0.08Fe''0.46Mg1.41Fe'''0.02Ti0.01Al0.09Si1.94O6
	G	=	-297297	(J)	H	=	-237201	(J)	S	=	44.41	(J/K)	V	=	5.83	(cc)	Cp	=	23.62	(J/K)
	diopside	clinoenstatit	hedenbergite	alumino-buffo	buffonite	essenite	jadeite
	-43.51	92.09	45.53	3.74	-2.74	4.73	0.15
clinopyroxene	mass	=	10.95	(gm)	density	=	3.3	(gm/cc)	(analysis	in	mole	%)
	cpx	Na0.00Ca0.20Fe''0.48Mg1.23Fe'''0.03Ti0.01Al0.13Si1.91O6
	G	=	-167276	(J)	H	=	-133075	(J)	S	=	25.27	(J/K)	V	=	3.32	(cc)	Cp	=	13.2	(J/K)
	diopside	clinoenstatit	hedenbergite	alumino-buffo	buffonite	essenite	jadeite
	-36.45	79.34	48.04	5.5	-3.5	6.59	0.49
feldspar	mass	=	54.58	(gm)	density	=	2.65	(gm/cc)	(analysis	in	mole	%)
	K0.01Na0.35Ca0.64Al1.64Si2.36O8
	G	=	-934472	(J)	H	=	-759546	(J)	S	=	129.27	(J/K)	V	=	20.62	(cc)	Cp	=	66.64	(J/K)
	albite	anorthite	sanidine
	34.87	64.07	1.06
rhm-oxide	mass	=	0.27	(gm)	density	=	4.41	(gm/cc)	(analysis	in	mole	%)
	Mn0.03Fe''0.54Mg0.29Fe'''0.16Al0.14Ti0.85O3
	G	=	-3058.64	(J)	H	=	-2295.37	(J)	S	=	0.56	(J/K)	V	=	0.06	(cc)	Cp	=	0.27	(J/K)
	geikielite	hematite	ilmenite	pyrophanite	corundum
	28.5	7.8	54.13	2.55	7.01
water	mass	=	0.5	(gm)	density	=	0.02	(gm/cc)
	H2O
	G	=	-13255.1	(J)	H	=	-5533.03	(J)	S	=	5.71	(J/K)	V	=	30.88	(cc)	Cp	=	1.28	(J/K)
Total	solids	mass	=	99.55	(gm)	density	=	1.54	(gm/cc)
	G	=	-1.61803e+06	(J)	H	=	-1.2968e+06	(J)	S	=	237.4	(J/K)	V	=	64.81	(cc)	Cp	=	121.6	(J/K)
Viscosity	of	the	System	cannot	be	computed.
System	mass	=	100.01	(gm)	density	=	1.54	(gm/cc)
	G	=	-1.62551e+06	(J)	H	=	-1.30262e+06	(J)	S	=	238.62	(J/K)	V	=	64.99	(cc)	Cp	=	122.25	(J/K)
Oxygen	delta	moles	=	-0.00281656	delta	grams	=	-0.0901264
	G	=	869.91	(J)	H	=	-99.27	(J)	S	=	-0.72	(J/K)	V	=	-316.88	(cc)	Cp	=	-0.1	(J/K)
**********----------**********
Title:	Dummy	Title
T	=	1070	(C)	P	=	0.1	(kbars)	log(10)	f	O2	=	-9.9	delta	HM	=	-5.62	NNO	=	-0.7	QFM	=	0	COH	=	2.09	IW	=	3.61
Constraint	Flags:	fO2	path	=	QFM
olivine	mass	=	14.06	(gm)	density	=	3.43	(gm/cc)	(analysis	in	mole	%)
	(Ca0.00Mg0.71Fe''0.28Mn0.01Co0.00Ni0.00)2SiO4
	G	=	-201818	(J)	H	=	-158765	(J)	S	=	32.05	(J/K)	V	=	4.09	(cc)	Cp	=	16.57	(J/K)
	tephroite	fayalite	co-olivine	ni-olivine	monticellite	forsterite
	1.17	27.83	0	0	0.96	70.05
orthopyroxene	mass	=	24.4	(gm)	density	=	3.3	(gm/cc)	(analysis	in	mole	%)
	opx	Na0.00Ca0.08Fe''0.46Mg1.40Fe'''0.02Ti0.00Al0.08Si1.94O6
	G	=	-376338	(J)	H	=	-300903	(J)	S	=	56.16	(J/K)	V	=	7.39	(cc)	Cp	=	29.95	(J/K)
	diopside	clinoenstatit	hedenbergite	alumino-buffo	buffonite	essenite	jadeite
	-44.13	91.98	46.39	3.64	-2.7	4.66	0.15
clinopyroxene	mass	=	4.82	(gm)	density	=	3.3	(gm/cc)	(analysis	in	mole	%)
	cpx	Na0.00Ca0.21Fe''0.49Mg1.22Fe'''0.03Ti0.01Al0.12Si1.92O6
	G	=	-73390	(J)	H	=	-58521.4	(J)	S	=	11.07	(J/K)	V	=	1.46	(cc)	Cp	=	5.79	(J/K)
	diopside	clinoenstatit	hedenbergite	alumino-buffo	buffonite	essenite	jadeite
	-35.89	78.38	48.52	5.41	-3.47	6.55	0.5
clinopyroxene	mass	=	0.95	(gm)	density	=	3.28	(gm/cc)	(analysis	in	mole	%)
	cpx	Na0.02Ca0.77Fe''0.24Mg0.84Fe'''0.05Ti0.04Al0.20Si1.84O6
	G	=	-14854.5	(J)	H	=	-12002.2	(J)	S	=	2.12	(J/K)	V	=	0.29	(cc)	Cp	=	1.11	(J/K)
	diopside	clinoenstatit	hedenbergite	alumino-buffo	buffonite	essenite	jadeite
	37.1	21.12	23.87	10.92	-2.49	7.82	1.66
feldspar	mass	=	54.98	(gm)	density	=	2.65	(gm/cc)	(analysis	in	mole	%)
	K0.01Na0.35Ca0.64Al1.64Si2.36O8
	G	=	-939981	(J)	H	=	-765730	(J)	S	=	129.73	(J/K)	V	=	20.77	(cc)	Cp	=	67.06	(J/K)
	albite	anorthite	sanidine
	34.87	63.97	1.16
rhm-oxide	mass	=	0.3	(gm)	density	=	4.41	(gm/cc)	(analysis	in	mole	%)
	Mn0.03Fe''0.55Mg0.28Fe'''0.16Al0.14Ti0.85O3
	G	=	-3406.33	(J)	H	=	-2561.7	(J)	S	=	0.63	(J/K)	V	=	0.07	(cc)	Cp	=	0.3	(J/K)
	geikielite	hematite	ilmenite	pyrophanite	corundum
	27.94	7.9	54.79	2.51	6.86
water	mass	=	0.5	(gm)	density	=	0.02	(gm/cc)
	H2O
	G	=	-13302.5	(J)	H	=	-5589.68	(J)	S	=	5.74	(J/K)	V	=	30.88	(cc)	Cp	=	1.29	(J/K)
Total	solids	mass	=	100.01	(gm)	density	=	1.54	(gm/cc)
	G	=	-1.62309e+06	(J)	H	=	-1.30407e+06	(J)	S	=	237.52	(J/K)	V	=	64.96	(cc)	Cp	=	122.05	(J/K)
Viscosity	of	the	System	cannot	be	computed.
System	mass	=	100.01	(gm)	density	=	1.54	(gm/cc)
	G	=	-1.62309e+06	(J)	H	=	-1.30407e+06	(J)	S	=	237.52	(J/K)	V	=	64.96	(cc)	Cp	=	122.05	(J/K)
Oxygen	delta	moles	=	-0.00287672	delta	grams	=	-0.0920517
	G	=	881.18	(J)	H	=	-100.35	(J)	S	=	-0.73	(J/K)	V	=	-321.25	(cc)	Cp	=	-0.1	(J/K)
**********----------**********
Title:	Dummy	Title
T	=	1060	(C)	P	=	0.1	(kbars)	log(10)	f	O2	=	-10.03	delta	HM	=	-5.63	NNO	=	-0.69	QFM	=	0	COH	=	2.08	IW	=	3.62
Constraint	Flags:
olivine	mass	=	14.14	(gm)	density	=	3.44	(gm/cc)	(analysis	in	mole	%)
	(Ca0.00Mg0.71Fe''0.28Mn0.01Co0.00Ni0.00)2SiO4
	G	=	-202140	(J)	H	=	-159347	(J)	S	=	32.1	(J/K)	V	=	4.11	(cc)	Cp	=	16.62	(J/K)
	tephroite	fayalite	co-olivine	ni-olivine	monticellite	forsterite
	1.16	28.24	0	0	0.92	69.67
orthopyroxene	mass	=	28.16	(gm)	density	=	3.3	(gm/cc)	(analysis	in	mole	%)
	opx	Na0.00Ca0.08Fe''0.47Mg1.40Fe'''0.02Ti0.00Al0.08Si1.94O6
	G	=	-433039	(J)	H	=	-347006	(J)	S	=	64.53	(J/K)	V	=	8.52	(cc)	Cp	=	34.5	(J/K)
	diopside	clinoenstatit	hedenbergite	alumino-buffo	buffonite	essenite	jadeite
	-44.87	92.1	47.06	3.62	-2.72	4.66	0.15
clinopyroxene	mass	=	1.86	(gm)	density	=	3.28	(gm/cc)	(analysis	in	mole	%)
	cpx	Na0.02Ca0.78Fe''0.24Mg0.83Fe'''0.05Ti0.04Al0.21Si1.84O6
	G	=	-29131.3	(J)	H	=	-23595.6	(J)	S	=	4.15	(J/K)	V	=	0.57	(cc)	Cp	=	2.17	(J/K)
	diopside	clinoenstatit	hedenbergite	alumino-buffo	buffonite	essenite	jadeite
	37.82	20.34	23.76	11.04	-2.48	7.83	1.68
feldspar	mass	=	55.05	(gm)	density	=	2.65	(gm/cc)	(analysis	in	mole	%)
	K0.01Na0.35Ca0.64Al1.64Si2.36O8
	G	=	-939799	(J)	H	=	-767313	(J)	S	=	129.38	(J/K)	V	=	20.79	(cc)	Cp	=	67.06	(J/K)
	albite	anorthite	sanidine
	34.84	64.01	1.16
rhm-oxide	mass	=	0.3	(gm)	density	=	4.42	(gm/cc)	(analysis	in	mole	%)
	Mn0.02Fe''0.55Mg0.27Fe'''0.16Al0.14Ti0.85O3
	G	=	-3347.17	(J)	H	=	-2523.15	(J)	S	=	0.62	(J/K)	V	=	0.07	(cc)	Cp	=	0.29	(J/K)
	geikielite	hematite	ilmenite	pyrophanite	corundum
	27.48	7.96	55.32	2.46	6.78
water	mass	=	0.5	(gm)	density	=	0.02	(gm/cc)
	H2O
	G	=	-13245.1	(J)	H	=	-5602.54	(J)	S	=	5.73	(J/K)	V	=	30.64	(cc)	Cp	=	1.28	(J/K)
Total	solids	mass	=	100.01	(gm)	density	=	1.55	(gm/cc)
	G	=	-1.6207e+06	(J)	H	=	-1.30539e+06	(J)	S	=	236.52	(J/K)	V	=	64.7	(cc)	Cp	=	121.94	(J/K)
Viscosity	of	the	System	cannot	be	computed.
System	mass	=	100.01	(gm)	density	=	1.55	(gm/cc)
	G	=	-1.6207e+06	(J)	H	=	-1.30539e+06	(J)	S	=	236.52	(J/K)	V	=	64.7	(cc)	Cp	=	121.94	(J/K)
**********----------**********
Title:	Dummy	Title
T	=	1050	(C)	P	=	0.1	(kbars)	log(10)	f	O2	=	-10.15	delta	HM	=	-5.6	NNO	=	-0.67	QFM	=	0.03	COH	=	2.09	IW	=	3.66
Constraint	Flags:
olivine	mass	=	14.14	(gm)	density	=	3.44	(gm/cc)	(analysis	in	mole	%)
	(Ca0.00Mg0.71Fe''0.28Mn0.01Co0.00Ni0.00)2SiO4
	G	=	-201775	(J)	H	=	-159483	(J)	S	=	31.96	(J/K)	V	=	4.11	(cc)	Cp	=	16.6	(J/K)
	tephroite	fayalite	co-olivine	ni-olivine	monticellite	forsterite
	1.16	28.23	0	0	0.88	69.73
orthopyroxene	mass	=	28.11	(gm)	density	=	3.31	(gm/cc)	(analysis	in	mole	%)
	opx	Na0.00Ca0.08Fe''0.47Mg1.40Fe'''0.02Ti0.00Al0.08Si1.94O6
	G	=	-431596	(J)	H	=	-346700	(J)	S	=	64.16	(J/K)	V	=	8.5	(cc)	Cp	=	34.41	(J/K)
	diopside	clinoenstatit	hedenbergite	alumino-buffo	buffonite	essenite	jadeite
	-45.12	92.27	47.15	3.62	-2.73	4.65	0.15
clinopyroxene	mass	=	1.92	(gm)	density	=	3.28	(gm/cc)	(analysis	in	mole	%)
	cpx	Na0.02Ca0.79Fe''0.23Mg0.82Fe'''0.05Ti0.04Al0.21Si1.83O6
	G	=	-30055.4	(J)	H	=	-24407.1	(J)	S	=	4.27	(J/K)	V	=	0.58	(cc)	Cp	=	2.24	(J/K)
	diopside	clinoenstatit	hedenbergite	alumino-buffo	buffonite	essenite	jadeite
	38.9	19.45	23.32	11.23	-2.44	7.83	1.71
feldspar	mass	=	55.04	(gm)	density	=	2.65	(gm/cc)	(analysis	in	mole	%)
	K0.01Na0.35Ca0.64Al1.64Si2.36O8
	G	=	-938407	(J)	H	=	-767901	(J)	S	=	128.86	(J/K)	V	=	20.78	(cc)	Cp	=	66.98	(J/K)
	albite	anorthite	sanidine
	34.84	64.01	1.16
rhm-oxide	mass	=	0.3	(gm)	density	=	4.42	(gm/cc)	(analysis	in	mole	%)
	Mn0.02Fe''0.55Mg0.27Fe'''0.16Al0.13Ti0.85O3
	G	=	-3318.41	(J)	H	=	-2507.95	(J)	S	=	0.61	(J/K)	V	=	0.07	(cc)	Cp	=	0.29	(J/K)
	geikielite	hematite	ilmenite	pyrophanite	corundum
	27.31	8.08	55.47	2.44	6.69
water	mass	=	0.5	(gm)	density	=	0.02	(gm/cc)
	H2O
	G	=	-13187.9	(J)	H	=	-5615.37	(J)	S	=	5.72	(J/K)	V	=	30.4	(cc)	Cp	=	1.28	(J/K)
Total	solids	mass	=	100.01	(gm)	density	=	1.55	(gm/cc)
	G	=	-1.61834e+06	(J)	H	=	-1.30661e+06	(J)	S	=	235.59	(J/K)	V	=	64.45	(cc)	Cp	=	121.81	(J/K)
Viscosity	of	the	System	cannot	be	computed.
System	mass	=	100.01	(gm)	density	=	1.55	(gm/cc)
	G	=	-1.61834e+06	(J)	H	=	-1.30661e+06	(J)	S	=	235.59	(J/K)	V	=	64.45	(cc)	Cp	=	121.81	(J/K)
**********----------**********
Title:	Dummy	Title
T	=	1040	(C)	P	=	0.1	(kbars)	log(10)	f	O2	=	-10.26	delta	HM	=	-5.58	NNO	=	-0.64	QFM	=	0.05	COH	=	2.1	IW	=	3.7
Constraint	Flags:
olivine	mass	=	14.13	(gm)	density	=	3.44	(gm/cc)	(analysis	in	mole	%)
	(Ca0.00Mg0.71Fe''0.28Mn0.01Co0.00Ni0.00)2SiO4
	G	=	-201410	(J)	H	=	-159618	(J)	S	=	31.83	(J/K)	V	=	4.1	(cc)	Cp	=	16.58	(J/K)
	tephroite	fayalite	co-olivine	ni-olivine	monticellite	forsterite
	1.16	28.21	0	0	0.85	69.78
orthopyroxene	mass	=	28.06	(gm)	density	=	3.31	(gm/cc)	(analysis	in	mole	%)
	opx	Na0.00Ca0.07Fe''0.47Mg1.40Fe'''0.02Ti0.00Al0.08Si1.94O6
	G	=	-430166	(J)	H	=	-346398	(J)	S	=	63.79	(J/K)	V	=	8.49	(cc)	Cp	=	34.32	(J/K)
	diopside	clinoenstatit	hedenbergite	alumino-buffo	buffonite	essenite	jadeite
	-45.36	92.44	47.25	3.62	-2.74	4.65	0.15
clinopyroxene	mass	=	1.98	(gm)	density	=	3.29	(gm/cc)	(analysis	in	mole	%)
	cpx	Na0.02Ca0.80Fe''0.23Mg0.82Fe'''0.05Ti0.05Al0.21Si1.83O6
	G	=	-30976.2	(J)	H	=	-25219.4	(J)	S	=	4.38	(J/K)	V	=	0.6	(cc)	Cp	=	2.3	(J/K)
	diopside	clinoenstatit	hedenbergite	alumino-buffo	buffonite	essenite	jadeite
	39.89	18.62	22.91	11.42	-2.4	7.82	1.74
feldspar	mass	=	55.04	(gm)	density	=	2.65	(gm/cc)	(analysis	in	mole	%)
	K0.01Na0.35Ca0.64Al1.64Si2.36O8
	G	=	-937017	(J)	H	=	-768485	(J)	S	=	128.34	(J/K)	V	=	20.78	(cc)	Cp	=	66.9	(J/K)
	albite	anorthite	sanidine
	34.84	64	1.16
rhm-oxide	mass	=	0.29	(gm)	density	=	4.43	(gm/cc)	(analysis	in	mole	%)
	Mn0.02Fe''0.56Mg0.27Fe'''0.16Al0.13Ti0.85O3
	G	=	-3289.24	(J)	H	=	-2492.34	(J)	S	=	0.61	(J/K)	V	=	0.07	(cc)	Cp	=	0.29	(J/K)
	geikielite	hematite	ilmenite	pyrophanite	corundum
	27.13	8.2	55.62	2.43	6.61
water	mass	=	0.5	(gm)	density	=	0.02	(gm/cc)
	H2O
	G	=	-13130.7	(J)	H	=	-5628.18	(J)	S	=	5.71	(J/K)	V	=	30.16	(cc)	Cp	=	1.28	(J/K)
Total	solids	mass	=	100.01	(gm)	density	=	1.56	(gm/cc)
	G	=	-1.61599e+06	(J)	H	=	-1.30784e+06	(J)	S	=	234.66	(J/K)	V	=	64.2	(cc)	Cp	=	121.68	(J/K)
Viscosity	of	the	System	cannot	be	computed.
System	mass	=	100.01	(gm)	density	=	1.56	(gm/cc)
	G	=	-1.61599e+06	(J)	H	=	-1.30784e+06	(J)	S	=	234.66	(J/K)	V	=	64.2	(cc)	Cp	=	121.68	(J/K)
**********----------**********
Title:	Dummy	Title
T	=	1030	(C)	P	=	0.1	(kbars)	log(10)	f	O2	=	-10.38	delta	HM	=	-5.56	NNO	=	-0.61	QFM	=	0.08	COH	=	2.12	IW	=	3.74
Constraint	Flags:
olivine	mass	=	14.13	(gm)	density	=	3.45	(gm/cc)	(analysis	in	mole	%)
	(Ca0.00Mg0.71Fe''0.28Mn0.01Co0.00Ni0.00)2SiO4
	G	=	-201045	(J)	H	=	-159751	(J)	S	=	31.69	(J/K)	V	=	4.1	(cc)	Cp	=	16.56	(J/K)
	tephroite	fayalite	co-olivine	ni-olivine	monticellite	forsterite
	1.16	28.19	0	0	0.81	69.84
orthopyroxene	mass	=	28.01	(gm)	density	=	3.31	(gm/cc)	(analysis	in	mole	%)
	opx	Na0.00Ca0.07Fe''0.47Mg1.40Fe'''0.02Ti0.00Al0.08Si1.94O6
	G	=	-428751	(J)	H	=	-346104	(J)	S	=	63.42	(J/K)	V	=	8.47	(cc)	Cp	=	34.23	(J/K)
	diopside	clinoenstatit	hedenbergite	alumino-buffo	buffonite	essenite	jadeite
	-45.61	92.61	47.34	3.61	-2.75	4.65	0.14
clinopyroxene	mass	=	2.04	(gm)	density	=	3.29	(gm/cc)	(analysis	in	mole	%)
	cpx	Na0.02Ca0.80Fe''0.23Mg0.81Fe'''0.05Ti0.05Al0.21Si1.83O6
	G	=	-31889.7	(J)	H	=	-26029.1	(J)	S	=	4.5	(J/K)	V	=	0.62	(cc)	Cp	=	2.37	(J/K)
	diopside	clinoenstatit	hedenbergite	alumino-buffo	buffonite	essenite	jadeite
	40.81	17.85	22.52	11.6	-2.36	7.82	1.77
feldspar	mass	=	55.03	(gm)	density	=	2.65	(gm/cc)	(analysis	in	mole	%)
	K0.01Na0.35Ca0.64Al1.64Si2.36O8
	G	=	-935628	(J)	H	=	-769064	(J)	S	=	127.82	(J/K)	V	=	20.77	(cc)	Cp	=	66.82	(J/K)
	albite	anorthite	sanidine
	34.84	64	1.16
rhm-oxide	mass	=	0.29	(gm)	density	=	4.43	(gm/cc)	(analysis	in	mole	%)
	Mn0.02Fe''0.56Mg0.27Fe'''0.17Al0.13Ti0.85O3
	G	=	-3259.66	(J)	H	=	-2476.29	(J)	S	=	0.6	(J/K)	V	=	0.07	(cc)	Cp	=	0.29	(J/K)
	geikielite	hematite	ilmenite	pyrophanite	corundum
	26.95	8.33	55.77	2.42	6.54
water	mass	=	0.5	(gm)	density	=	0.02	(gm/cc)
	H2O
	G	=	-13073.6	(J)	H	=	-5640.96	(J)	S	=	5.7	(J/K)	V	=	29.92	(cc)	Cp	=	1.28	(J/K)
Total	solids	mass	=	100.01	(gm)	density	=	1.56	(gm/cc)
	G	=	-1.61365e+06	(J)	H	=	-1.30907e+06	(J)	S	=	233.73	(J/K)	V	=	63.95	(cc)	Cp	=	121.54	(J/K)
Viscosity	of	the	System	cannot	be	computed.
System	mass	=	100.01	(gm)	density	=	1.56	(gm/cc)
	G	=	-1.61365e+06	(J)	H	=	-1.30907e+06	(J)	S	=	233.73	(J/K)	V	=	63.95	(cc)	Cp	=	121.54	(J/K)
**********----------**********
Title:	Dummy	Title
T	=	1020	(C)	P	=	0.1	(kbars)	log(10)	f	O2	=	-10.5	delta	HM	=	-5.53	NNO	=	-0.58	QFM	=	0.11	COH	=	2.13	IW	=	3.78
Constraint	Flags:
olivine	mass	=	14.12	(gm)	density	=	3.45	(gm/cc)	(analysis	in	mole	%)
	(Ca0.00Mg0.71Fe''0.28Mn0.01Co0.00Ni0.00)2SiO4
	G	=	-200680	(J)	H	=	-159883	(J)	S	=	31.55	(J/K)	V	=	4.1	(cc)	Cp	=	16.53	(J/K)
	tephroite	fayalite	co-olivine	ni-olivine	monticellite	forsterite
	1.16	28.17	0	0	0.77	69.89
orthopyroxene	mass	=	27.97	(gm)	density	=	3.31	(gm/cc)	(analysis	in	mole	%)
	opx	Na0.00Ca0.07Fe''0.47Mg1.40Fe'''0.02Ti0.00Al0.08Si1.95O6
	G	=	-427354	(J)	H	=	-345819	(J)	S	=	63.05	(J/K)	V	=	8.45	(cc)	Cp	=	34.14	(J/K)
	diopside	clinoenstatit	hedenbergite	alumino-buffo	buffonite	essenite	jadeite
	-45.86	92.78	47.44	3.61	-2.76	4.64	0.14
clinopyroxene	mass	=	2.1	(gm)	density	=	3.29	(gm/cc)	(analysis	in	mole	%)
	cpx	Na0.02Ca0.81Fe''0.22Mg0.81Fe'''0.05Ti0.05Al0.21Si1.83O6
	G	=	-32793.3	(J)	H	=	-26834.1	(J)	S	=	4.61	(J/K)	V	=	0.64	(cc)	Cp	=	2.44	(J/K)
	diopside	clinoenstatit	hedenbergite	alumino-buffo	buffonite	essenite	jadeite
	41.66	17.12	22.15	11.78	-2.32	7.81	1.79
feldspar	mass	=	55.02	(gm)	density	=	2.65	(gm/cc)	(analysis	in	mole	%)
	K0.01Na0.35Ca0.64Al1.64Si2.36O8
	G	=	-934240	(J)	H	=	-769640	(J)	S	=	127.29	(J/K)	V	=	20.76	(cc)	Cp	=	66.74	(J/K)
	albite	anorthite	sanidine
	34.84	64	1.16
rhm-oxide	mass	=	0.29	(gm)	density	=	4.44	(gm/cc)	(analysis	in	mole	%)
	Mn0.02Fe''0.56Mg0.27Fe'''0.17Al0.13Ti0.85O3
	G	=	-3229.63	(J)	H	=	-2459.78	(J)	S	=	0.6	(J/K)	V	=	0.07	(cc)	Cp	=	0.29	(J/K)
	geikielite	hematite	ilmenite	pyrophanite	corundum
	26.76	8.46	55.92	2.4	6.46
water	mass	=	0.5	(gm)	density	=	0.02	(gm/cc)
	H2O
	G	=	-13016.6	(J)	H	=	-5653.72	(J)	S	=	5.69	(J/K)	V	=	29.68	(cc)	Cp	=	1.27	(J/K)
Total	solids	mass	=	100.01	(gm)	density	=	1.57	(gm/cc)
	G	=	-1.61131e+06	(J)	H	=	-1.31029e+06	(J)	S	=	232.78	(J/K)	V	=	63.69	(cc)	Cp	=	121.41	(J/K)
Viscosity	of	the	System	cannot	be	computed.
System	mass	=	100.01	(gm)	density	=	1.57	(gm/cc)
	G	=	-1.61131e+06	(J)	H	=	-1.31029e+06	(J)	S	=	232.78	(J/K)	V	=	63.69	(cc)	Cp	=	121.41	(J/K)
**********----------**********
Title:	Dummy	Title
T	=	1010	(C)	P	=	0.1	(kbars)	log(10)	f	O2	=	-10.62	delta	HM	=	-5.51	NNO	=	-0.55	QFM	=	0.13	COH	=	2.15	IW	=	3.83
Constraint	Flags:
olivine	mass	=	14.12	(gm)	density	=	3.45	(gm/cc)	(analysis	in	mole	%)
	(Ca0.00Mg0.71Fe''0.28Mn0.01Co0.00Ni0.00)2SiO4
	G	=	-200315	(J)	H	=	-160013	(J)	S	=	31.41	(J/K)	V	=	4.09	(cc)	Cp	=	16.51	(J/K)
	tephroite	fayalite	co-olivine	ni-olivine	monticellite	forsterite
	1.17	28.16	0	0	0.74	69.94
orthopyroxene	mass	=	27.92	(gm)	density	=	3.31	(gm/cc)	(analysis	in	mole	%)
	opx	Na0.00Ca0.07Fe''0.48Mg1.40Fe'''0.02Ti0.00Al0.08Si1.95O6
	G	=	-425978	(J)	H	=	-345545	(J)	S	=	62.68	(J/K)	V	=	8.43	(cc)	Cp	=	34.05	(J/K)
	diopside	clinoenstatit	hedenbergite	alumino-buffo	buffonite	essenite	jadeite
	-46.1	92.94	47.54	3.6	-2.77	4.64	0.14
clinopyroxene	mass	=	2.16	(gm)	density	=	3.29	(gm/cc)	(analysis	in	mole	%)
	cpx	Na0.02Ca0.82Fe''0.22Mg0.80Fe'''0.06Ti0.05Al0.22Si1.83O6
	G	=	-33685	(J)	H	=	-27632.7	(J)	S	=	4.72	(J/K)	V	=	0.66	(cc)	Cp	=	2.5	(J/K)
	diopside	clinoenstatit	hedenbergite	alumino-buffo	buffonite	essenite	jadeite
	42.46	16.44	21.8	11.97	-2.28	7.8	1.82
feldspar	mass	=	55.02	(gm)	density	=	2.65	(gm/cc)	(analysis	in	mole	%)
	K0.01Na0.35Ca0.64Al1.64Si2.36O8
	G	=	-932855	(J)	H	=	-770213	(J)	S	=	126.75	(J/K)	V	=	20.75	(cc)	Cp	=	66.95	(J/K)
	albite	anorthite	sanidine
	34.84	64	1.16
rhm-oxide	mass	=	0.29	(gm)	density	=	4.44	(gm/cc)	(analysis	in	mole	%)
	Mn0.02Fe''0.56Mg0.27Fe'''0.17Al0.13Ti0.85O3
	G	=	-3199.12	(J)	H	=	-2442.78	(J)	S	=	0.59	(J/K)	V	=	0.07	(cc)	Cp	=	0.28	(J/K)
	geikielite	hematite	ilmenite	pyrophanite	corundum
	26.58	8.6	56.06	2.39	6.38
water	mass	=	0.5	(gm)	density	=	0.02	(gm/cc)
	H2O
	G	=	-12959.7	(J)	H	=	-5666.46	(J)	S	=	5.68	(J/K)	V	=	29.44	(cc)	Cp	=	1.27	(J/K)
Total	solids	mass	=	100.01	(gm)	density	=	1.58	(gm/cc)
	G	=	-1.60899e+06	(J)	H	=	-1.31151e+06	(J)	S	=	231.83	(J/K)	V	=	63.44	(cc)	Cp	=	121.57	(J/K)
Viscosity	of	the	System	cannot	be	computed.
System	mass	=	100.01	(gm)	density	=	1.58	(gm/cc)
	G	=	-1.60899e+06	(J)	H	=	-1.31151e+06	(J)	S	=	231.83	(J/K)	V	=	63.44	(cc)	Cp	=	121.57	(J/K)
**********----------**********
Title:	Dummy	Title
T	=	1000	(C)	P	=	0.1	(kbars)	log(10)	f	O2	=	-10.74	delta	HM	=	-5.49	NNO	=	-0.52	QFM	=	0.16	COH	=	2.16	IW	=	3.87
Constraint	Flags:
olivine	mass	=	14.11	(gm)	density	=	3.45	(gm/cc)	(analysis	in	mole	%)
	(Ca0.00Mg0.71Fe''0.28Mn0.01Co0.00Ni0.00)2SiO4
	G	=	-199951	(J)	H	=	-160143	(J)	S	=	31.27	(J/K)	V	=	4.09	(cc)	Cp	=	16.48	(J/K)
	tephroite	fayalite	co-olivine	ni-olivine	monticellite	forsterite
	1.17	28.14	0	0	0.7	69.99
orthopyroxene	mass	=	27.88	(gm)	density	=	3.31	(gm/cc)	(analysis	in	mole	%)
	opx	Na0.00Ca0.07Fe''0.48Mg1.40Fe'''0.02Ti0.00Al0.08Si1.95O6
	G	=	-424622	(J)	H	=	-345283	(J)	S	=	62.32	(J/K)	V	=	8.41	(cc)	Cp	=	33.96	(J/K)
	diopside	clinoenstatit	hedenbergite	alumino-buffo	buffonite	essenite	jadeite
	-46.35	93.11	47.64	3.6	-2.78	4.64	0.14
clinopyroxene	mass	=	2.22	(gm)	density	=	3.29	(gm/cc)	(analysis	in	mole	%)
	cpx	Na0.02Ca0.82Fe''0.21Mg0.80Fe'''0.06Ti0.05Al0.22Si1.82O6
	G	=	-34563.2	(J)	H	=	-28423.6	(J)	S	=	4.82	(J/K)	V	=	0.67	(cc)	Cp	=	2.57	(J/K)
	diopside	clinoenstatit	hedenbergite	alumino-buffo	buffonite	essenite	jadeite
	43.21	15.79	21.45	12.15	-2.25	7.79	1.85
feldspar	mass	=	55.01	(gm)	density	=	2.65	(gm/cc)	(analysis	in	mole	%)
	K0.01Na0.35Ca0.64Al1.64Si2.36O8
	G	=	-931471	(J)	H	=	-770784	(J)	S	=	126.21	(J/K)	V	=	20.75	(cc)	Cp	=	66.87	(J/K)
	albite	anorthite	sanidine
	34.85	64	1.16
rhm-oxide	mass	=	0.29	(gm)	density	=	4.45	(gm/cc)	(analysis	in	mole	%)
	Mn0.02Fe''0.56Mg0.26Fe'''0.17Al0.13Ti0.85O3
	G	=	-3168.09	(J)	H	=	-2425.25	(J)	S	=	0.58	(J/K)	V	=	0.06	(cc)	Cp	=	0.28	(J/K)
	geikielite	hematite	ilmenite	pyrophanite	corundum
	26.38	8.75	56.2	2.37	6.3
water	mass	=	0.5	(gm)	density	=	0.02	(gm/cc)
	H2O
	G	=	-12902.9	(J)	H	=	-5679.17	(J)	S	=	5.67	(J/K)	V	=	29.2	(cc)	Cp	=	1.27	(J/K)
Total	solids	mass	=	100.01	(gm)	density	=	1.58	(gm/cc)
	G	=	-1.60668e+06	(J)	H	=	-1.31274e+06	(J)	S	=	230.88	(J/K)	V	=	63.19	(cc)	Cp	=	121.43	(J/K)
Viscosity	of	the	System	cannot	be	computed.
System	mass	=	100.01	(gm)	density	=	1.58	(gm/cc)
	G	=	-1.60668e+06	(J)	H	=	-1.31274e+06	(J)	S	=	230.88	(J/K)	V	=	63.19	(cc)	Cp	=	121.43	(J/K)
**********----------**********
Title:	Dummy	Title
T	=	990	(C)	P	=	0.1	(kbars)	log(10)	f	O2	=	-10.86	delta	HM	=	-5.46	NNO	=	-0.49	QFM	=	0.19	COH	=	2.18	IW	=	3.91
Constraint	Flags:
olivine	mass	=	14.11	(gm)	density	=	3.45	(gm/cc)	(analysis	in	mole	%)
	(Ca0.00Mg0.71Fe''0.28Mn0.01Co0.00Ni0.00)2SiO4
	G	=	-199586	(J)	H	=	-160271	(J)	S	=	31.13	(J/K)	V	=	4.09	(cc)	Cp	=	16.46	(J/K)
	tephroite	fayalite	co-olivine	ni-olivine	monticellite	forsterite
	1.17	28.12	0	0	0.67	70.05
orthopyroxene	mass	=	27.84	(gm)	density	=	3.32	(gm/cc)	(analysis	in	mole	%)
	opx	Na0.00Ca0.07Fe''0.48Mg1.40Fe'''0.02Ti0.00Al0.08Si1.95O6
	G	=	-423289	(J)	H	=	-345034	(J)	S	=	61.95	(J/K)	V	=	8.4	(cc)	Cp	=	33.88	(J/K)
	diopside	clinoenstatit	hedenbergite	alumino-buffo	buffonite	essenite	jadeite
	-46.6	93.27	47.74	3.6	-2.79	4.64	0.14
clinopyroxene	mass	=	2.28	(gm)	density	=	3.29	(gm/cc)	(analysis	in	mole	%)
	cpx	Na0.02Ca0.83Fe''0.21Mg0.79Fe'''0.06Ti0.05Al0.22Si1.82O6
	G	=	-35427.1	(J)	H	=	-29205.9	(J)	S	=	4.93	(J/K)	V	=	0.69	(cc)	Cp	=	2.63	(J/K)
	diopside	clinoenstatit	hedenbergite	alumino-buffo	buffonite	essenite	jadeite
	43.91	15.18	21.12	12.34	-2.21	7.78	1.88
feldspar	mass	=	55	(gm)	density	=	2.65	(gm/cc)	(analysis	in	mole	%)
	K0.01Na0.35Ca0.64Al1.64Si2.36O8
	G	=	-930089	(J)	H	=	-771350	(J)	S	=	125.67	(J/K)	V	=	20.74	(cc)	Cp	=	66.78	(J/K)
	albite	anorthite	sanidine
	34.85	64	1.16
rhm-oxide	mass	=	0.29	(gm)	density	=	4.45	(gm/cc)	(analysis	in	mole	%)
	Mn0.02Fe''0.56Mg0.26Fe'''0.18Al0.12Ti0.85O3
	G	=	-3136.5	(J)	H	=	-2407.16	(J)	S	=	0.58	(J/K)	V	=	0.06	(cc)	Cp	=	0.28	(J/K)
	geikielite	hematite	ilmenite	pyrophanite	corundum
	26.18	8.9	56.34	2.35	6.22
water	mass	=	0.5	(gm)	density	=	0.02	(gm/cc)
	H2O
	G	=	-12846.2	(J)	H	=	-5691.86	(J)	S	=	5.66	(J/K)	V	=	28.96	(cc)	Cp	=	1.27	(J/K)
Total	solids	mass	=	100.01	(gm)	density	=	1.59	(gm/cc)
	G	=	-1.60437e+06	(J)	H	=	-1.31396e+06	(J)	S	=	229.91	(J/K)	V	=	62.94	(cc)	Cp	=	121.3	(J/K)
Viscosity	of	the	System	cannot	be	computed.
System	mass	=	100.01	(gm)	density	=	1.59	(gm/cc)
	G	=	-1.60437e+06	(J)	H	=	-1.31396e+06	(J)	S	=	229.91	(J/K)	V	=	62.94	(cc)	Cp	=	121.3	(J/K)
**********----------**********
Title:	Dummy	Title
T	=	980	(C)	P	=	0.1	(kbars)	log(10)	f	O2	=	-11	delta	HM	=	-5.45	NNO	=	-0.46	QFM	=	0.21	COH	=	2.18	IW	=	3.95
Constraint	Flags:
olivine	mass	=	14.1	(gm)	density	=	3.45	(gm/cc)	(analysis	in	mole	%)
	(Ca0.00Mg0.71Fe''0.28Mn0.01Co0.00Ni0.00)2SiO4
	G	=	-199177	(J)	H	=	-160362	(J)	S	=	30.97	(J/K)	V	=	4.08	(cc)	Cp	=	16.43	(J/K)
	tephroite	fayalite	co-olivine	ni-olivine	monticellite	forsterite
	1.17	28.09	0	0	0.64	70.1
orthopyroxene	mass	=	27.8	(gm)	density	=	3.32	(gm/cc)	(analysis	in	mole	%)
	opx	Na0.00Ca0.06Fe''0.48Mg1.40Fe'''0.02Ti0.00Al0.08Si1.95O6
	G	=	-422010	(J)	H	=	-344827	(J)	S	=	61.59	(J/K)	V	=	8.38	(cc)	Cp	=	33.79	(J/K)
	diopside	clinoenstatit	hedenbergite	alumino-buffo	buffonite	essenite	jadeite
	-46.82	93.43	47.83	3.59	-2.8	4.63	0.14
clinopyroxene	mass	=	2.33	(gm)	density	=	3.29	(gm/cc)	(analysis	in	mole	%)
	cpx	Na0.02Ca0.84Fe''0.21Mg0.79Fe'''0.06Ti0.05Al0.22Si1.82O6
	G	=	-36222.8	(J)	H	=	-29935.7	(J)	S	=	5.02	(J/K)	V	=	0.71	(cc)	Cp	=	2.69	(J/K)
	diopside	clinoenstatit	hedenbergite	alumino-buffo	buffonite	essenite	jadeite
	44.61	14.59	20.8	12.53	-2.19	7.75	1.9
feldspar	mass	=	55	(gm)	density	=	2.65	(gm/cc)	(analysis	in	mole	%)
	K0.01Na0.35Ca0.64Al1.64Si2.36O8
	G	=	-928747	(J)	H	=	-771944	(J)	S	=	125.13	(J/K)	V	=	20.73	(cc)	Cp	=	66.7	(J/K)
	albite	anorthite	sanidine
	34.85	63.99	1.16
spinel	mass	=	0.01	(gm)	density	=	4.6	(gm/cc)	(analysis	in	mole	%)
	Fe''1.17Mg0.33Fe'''0.83Al0.17Cr0.00Ti0.50O4
	G	=	-52.9	(J)	H	=	-37.3	(J)	S	=	0.01	(J/K)	V	=	0	(cc)	Cp	=	0.01	(J/K)
	chromite	hercynite	magnetite	spinel	ulvospinel
	0	-24.09	41.51	32.62	49.97
rhm-oxide	mass	=	0.28	(gm)	density	=	4.45	(gm/cc)	(analysis	in	mole	%)
	Mn0.02Fe''0.57Mg0.26Fe'''0.18Al0.12Ti0.85O3
	G	=	-3079.59	(J)	H	=	-2369.72	(J)	S	=	0.57	(J/K)	V	=	0.06	(cc)	Cp	=	0.28	(J/K)
	geikielite	hematite	ilmenite	pyrophanite	corundum
	26	9	56.51	2.34	6.14
water	mass	=	0.5	(gm)	density	=	0.02	(gm/cc)
	H2O
	G	=	-12789.6	(J)	H	=	-5704.52	(J)	S	=	5.65	(J/K)	V	=	28.72	(cc)	Cp	=	1.27	(J/K)
Total	solids	mass	=	100.01	(gm)	density	=	1.6	(gm/cc)
	G	=	-1.60208e+06	(J)	H	=	-1.31518e+06	(J)	S	=	228.94	(J/K)	V	=	62.69	(cc)	Cp	=	121.16	(J/K)
Viscosity	of	the	System	cannot	be	computed.
System	mass	=	100.01	(gm)	density	=	1.6	(gm/cc)
	G	=	-1.60208e+06	(J)	H	=	-1.31518e+06	(J)	S	=	228.94	(J/K)	V	=	62.69	(cc)	Cp	=	121.16	(J/K)
**********----------**********
Title:	Dummy	Title
T	=	970	(C)	P	=	0.1	(kbars)	log(10)	f	O2	=	-11.14	delta	HM	=	-5.44	NNO	=	-0.44	QFM	=	0.22	COH	=	2.18	IW	=	3.98
Constraint	Flags:
olivine	mass	=	14.08	(gm)	density	=	3.45	(gm/cc)	(analysis	in	mole	%)
	(Ca0.00Mg0.71Fe''0.28Mn0.01Co0.00Ni0.00)2SiO4
	G	=	-198739	(J)	H	=	-160428	(J)	S	=	30.82	(J/K)	V	=	4.08	(cc)	Cp	=	16.4	(J/K)
	tephroite	fayalite	co-olivine	ni-olivine	monticellite	forsterite
	1.17	28.07	0	0	0.61	70.16
orthopyroxene	mass	=	27.76	(gm)	density	=	3.32	(gm/cc)	(analysis	in	mole	%)
	opx	Na0.00Ca0.06Fe''0.48Mg1.41Fe'''0.02Ti0.00Al0.08Si1.95O6
	G	=	-420773	(J)	H	=	-344651	(J)	S	=	61.23	(J/K)	V	=	8.36	(cc)	Cp	=	33.71	(J/K)
	diopside	clinoenstatit	hedenbergite	alumino-buffo	buffonite	essenite	jadeite
	-47.03	93.59	47.93	3.59	-2.82	4.61	0.14
clinopyroxene	mass	=	2.38	(gm)	density	=	3.29	(gm/cc)	(analysis	in	mole	%)
	cpx	Na0.02Ca0.84Fe''0.20Mg0.79Fe'''0.06Ti0.05Al0.22Si1.82O6
	G	=	-36964.1	(J)	H	=	-30623.8	(J)	S	=	5.1	(J/K)	V	=	0.72	(cc)	Cp	=	2.74	(J/K)
	diopside	clinoenstatit	hedenbergite	alumino-buffo	buffonite	essenite	jadeite
	45.3	14.03	20.48	12.73	-2.17	7.7	1.92
feldspar	mass	=	54.99	(gm)	density	=	2.65	(gm/cc)	(analysis	in	mole	%)
	K0.01Na0.35Ca0.64Al1.64Si2.36O8
	G	=	-927437	(J)	H	=	-772560	(J)	S	=	124.58	(J/K)	V	=	20.72	(cc)	Cp	=	66.62	(J/K)
	albite	anorthite	sanidine
	34.85	63.99	1.16
spinel	mass	=	0.02	(gm)	density	=	4.62	(gm/cc)	(analysis	in	mole	%)
	Fe''1.17Mg0.32Fe'''0.85Al0.17Cr0.00Ti0.49O4
	G	=	-142.41	(J)	H	=	-100.6	(J)	S	=	0.03	(J/K)	V	=	0	(cc)	Cp	=	0.02	(J/K)
	chromite	hercynite	magnetite	spinel	ulvospinel
	0	-23.24	42.74	31.73	48.77
rhm-oxide	mass	=	0.28	(gm)	density	=	4.46	(gm/cc)	(analysis	in	mole	%)
	Mn0.02Fe''0.57Mg0.26Fe'''0.18Al0.12Ti0.85O3
	G	=	-3006.32	(J)	H	=	-2319.61	(J)	S	=	0.55	(J/K)	V	=	0.06	(cc)	Cp	=	0.27	(J/K)
	geikielite	hematite	ilmenite	pyrophanite	corundum
	25.84	9.05	56.71	2.33	6.07
water	mass	=	0.5	(gm)	density	=	0.02	(gm/cc)
	H2O
	G	=	-12733.1	(J)	H	=	-5717.16	(J)	S	=	5.64	(J/K)	V	=	28.48	(cc)	Cp	=	1.26	(J/K)
Total	solids	mass	=	100.01	(gm)	density	=	1.6	(gm/cc)
	G	=	-1.5998e+06	(J)	H	=	-1.3164e+06	(J)	S	=	227.96	(J/K)	V	=	62.43	(cc)	Cp	=	121.02	(J/K)
Viscosity	of	the	System	cannot	be	computed.
System	mass	=	100.01	(gm)	density	=	1.6	(gm/cc)
	G	=	-1.5998e+06	(J)	H	=	-1.3164e+06	(J)	S	=	227.96	(J/K)	V	=	62.43	(cc)	Cp	=	121.02	(J/K)
**********----------**********
Title:	Dummy	Title
T	=	960	(C)	P	=	0.1	(kbars)	log(10)	f	O2	=	-11.29	delta	HM	=	-5.43	NNO	=	-0.43	QFM	=	0.24	COH	=	2.18	IW	=	4
Constraint	Flags:
olivine	mass	=	14.07	(gm)	density	=	3.46	(gm/cc)	(analysis	in	mole	%)
	(Ca0.00Mg0.71Fe''0.28Mn0.01Co0.00Ni0.00)2SiO4
	G	=	-198301	(J)	H	=	-160493	(J)	S	=	30.66	(J/K)	V	=	4.07	(cc)	Cp	=	16.37	(J/K)
	tephroite	fayalite	co-olivine	ni-olivine	monticellite	forsterite
	1.17	28.04	0	0	0.58	70.21
orthopyroxene	mass	=	27.72	(gm)	density	=	3.32	(gm/cc)	(analysis	in	mole	%)
	opx	Na0.00Ca0.06Fe''0.48Mg1.41Fe'''0.02Ti0.00Al0.08Si1.95O6
	G	=	-419555	(J)	H	=	-344486	(J)	S	=	60.88	(J/K)	V	=	8.35	(cc)	Cp	=	33.63	(J/K)
	diopside	clinoenstatit	hedenbergite	alumino-buffo	buffonite	essenite	jadeite
	-47.24	93.74	48.02	3.59	-2.83	4.58	0.13
clinopyroxene	mass	=	2.43	(gm)	density	=	3.29	(gm/cc)	(analysis	in	mole	%)
	cpx	Na0.02Ca0.85Fe''0.20Mg0.78Fe'''0.05Ti0.05Al0.23Si1.82O6
	G	=	-37685.6	(J)	H	=	-31298.4	(J)	S	=	5.18	(J/K)	V	=	0.74	(cc)	Cp	=	2.79	(J/K)
	diopside	clinoenstatit	hedenbergite	alumino-buffo	buffonite	essenite	jadeite
	45.96	13.5	20.16	12.94	-2.16	7.65	1.95
feldspar	mass	=	54.99	(gm)	density	=	2.65	(gm/cc)	(analysis	in	mole	%)
	K0.01Na0.35Ca0.64Al1.64Si2.36O8
	G	=	-926136	(J)	H	=	-773177	(J)	S	=	124.04	(J/K)	V	=	20.72	(cc)	Cp	=	66.54	(J/K)
	albite	anorthite	sanidine
	34.85	63.99	1.16
spinel	mass	=	0.03	(gm)	density	=	4.63	(gm/cc)	(analysis	in	mole	%)
	Fe''1.17Mg0.31Fe'''0.88Al0.17Cr0.00Ti0.48O4
	G	=	-233.28	(J)	H	=	-165.09	(J)	S	=	0.06	(J/K)	V	=	0.01	(cc)	Cp	=	0.03	(J/K)
	chromite	hercynite	magnetite	spinel	ulvospinel
	0	-22.39	43.98	30.84	47.57
rhm-oxide	mass	=	0.27	(gm)	density	=	4.46	(gm/cc)	(analysis	in	mole	%)
	Mn0.02Fe''0.57Mg0.26Fe'''0.18Al0.12Ti0.85O3
	G	=	-2933.37	(J)	H	=	-2269.5	(J)	S	=	0.54	(J/K)	V	=	0.06	(cc)	Cp	=	0.26	(J/K)
	geikielite	hematite	ilmenite	pyrophanite	corundum
	25.67	9.08	56.92	2.32	6
water	mass	=	0.5	(gm)	density	=	0.02	(gm/cc)
	H2O
	G	=	-12676.8	(J)	H	=	-5729.78	(J)	S	=	5.63	(J/K)	V	=	28.24	(cc)	Cp	=	1.26	(J/K)
Total	solids	mass	=	100.01	(gm)	density	=	1.61	(gm/cc)
	G	=	-1.59752e+06	(J)	H	=	-1.31762e+06	(J)	S	=	226.98	(J/K)	V	=	62.18	(cc)	Cp	=	120.88	(J/K)
Viscosity	of	the	System	cannot	be	computed.
System	mass	=	100.01	(gm)	density	=	1.61	(gm/cc)
	G	=	-1.59752e+06	(J)	H	=	-1.31762e+06	(J)	S	=	226.98	(J/K)	V	=	62.18	(cc)	Cp	=	120.88	(J/K)
**********----------**********
Title:	Dummy	Title
T	=	950	(C)	P	=	0.1	(kbars)	log(10)	f	O2	=	-11.44	delta	HM	=	-5.42	NNO	=	-0.41	QFM	=	0.25	COH	=	2.18	IW	=	4.03
Constraint	Flags:
olivine	mass	=	14.06	(gm)	density	=	3.46	(gm/cc)	(analysis	in	mole	%)
	(Ca0.00Mg0.71Fe''0.28Mn0.01Co0.00Ni0.00)2SiO4
	G	=	-197864	(J)	H	=	-160558	(J)	S	=	30.5	(J/K)	V	=	4.07	(cc)	Cp	=	16.34	(J/K)
	tephroite	fayalite	co-olivine	ni-olivine	monticellite	forsterite
	1.17	28.01	0	0	0.55	70.27
orthopyroxene	mass	=	27.68	(gm)	density	=	3.32	(gm/cc)	(analysis	in	mole	%)
	opx	Na0.00Ca0.06Fe''0.48Mg1.41Fe'''0.02Ti0.00Al0.08Si1.95O6
	G	=	-418355	(J)	H	=	-344332	(J)	S	=	60.52	(J/K)	V	=	8.33	(cc)	Cp	=	33.55	(J/K)
	diopside	clinoenstatit	hedenbergite	alumino-buffo	buffonite	essenite	jadeite
	-47.44	93.89	48.11	3.59	-2.84	4.56	0.13
clinopyroxene	mass	=	2.47	(gm)	density	=	3.3	(gm/cc)	(analysis	in	mole	%)
	cpx	Na0.02Ca0.85Fe''0.20Mg0.78Fe'''0.05Ti0.06Al0.23Si1.81O6
	G	=	-38388.2	(J)	H	=	-31960	(J)	S	=	5.26	(J/K)	V	=	0.75	(cc)	Cp	=	2.84	(J/K)
	diopside	clinoenstatit	hedenbergite	alumino-buffo	buffonite	essenite	jadeite
	46.59	12.98	19.86	13.15	-2.15	7.59	1.97
feldspar	mass	=	54.99	(gm)	density	=	2.65	(gm/cc)	(analysis	in	mole	%)
	K0.01Na0.35Ca0.64Al1.64Si2.36O8
	G	=	-924842	(J)	H	=	-773795	(J)	S	=	123.49	(J/K)	V	=	20.71	(cc)	Cp	=	66.46	(J/K)
	albite	anorthite	sanidine
	34.85	63.99	1.16
spinel	mass	=	0.04	(gm)	density	=	4.64	(gm/cc)	(analysis	in	mole	%)
	Fe''1.16Mg0.30Fe'''0.90Al0.17Cr0.00Ti0.46O4
	G	=	-324.67	(J)	H	=	-230.2	(J)	S	=	0.08	(J/K)	V	=	0.01	(cc)	Cp	=	0.04	(J/K)
	chromite	hercynite	magnetite	spinel	ulvospinel
	0	-21.56	45.21	29.97	46.38
rhm-oxide	mass	=	0.26	(gm)	density	=	4.46	(gm/cc)	(analysis	in	mole	%)
	Mn0.02Fe''0.57Mg0.26Fe'''0.18Al0.12Ti0.85O3
	G	=	-2861	(J)	H	=	-2219.57	(J)	S	=	0.52	(J/K)	V	=	0.06	(cc)	Cp	=	0.26	(J/K)
	geikielite	hematite	ilmenite	pyrophanite	corundum
	25.51	9.11	57.14	2.31	5.93
water	mass	=	0.5	(gm)	density	=	0.02	(gm/cc)
	H2O
	G	=	-12620.5	(J)	H	=	-5742.37	(J)	S	=	5.62	(J/K)	V	=	27.99	(cc)	Cp	=	1.26	(J/K)
Total	solids	mass	=	100.01	(gm)	density	=	1.61	(gm/cc)
	G	=	-1.59526e+06	(J)	H	=	-1.31884e+06	(J)	S	=	225.99	(J/K)	V	=	61.93	(cc)	Cp	=	120.74	(J/K)
Viscosity	of	the	System	cannot	be	computed.
System	mass	=	100.01	(gm)	density	=	1.61	(gm/cc)
	G	=	-1.59526e+06	(J)	H	=	-1.31884e+06	(J)	S	=	225.99	(J/K)	V	=	61.93	(cc)	Cp	=	120.74	(J/K)
**********----------**********
Title:	Dummy	Title
T	=	940	(C)	P	=	0.1	(kbars)	log(10)	f	O2	=	-11.59	delta	HM	=	-5.41	NNO	=	-0.4	QFM	=	0.26	COH	=	2.18	IW	=	4.06
Constraint	Flags:
olivine	mass	=	14.05	(gm)	density	=	3.46	(gm/cc)	(analysis	in	mole	%)
	(Ca0.00Mg0.71Fe''0.28Mn0.01Co0.00Ni0.00)2SiO4
	G	=	-197429	(J)	H	=	-160622	(J)	S	=	30.34	(J/K)	V	=	4.06	(cc)	Cp	=	16.3	(J/K)
	tephroite	fayalite	co-olivine	ni-olivine	monticellite	forsterite
	1.17	27.98	0	0	0.52	70.33
orthopyroxene	mass	=	27.65	(gm)	density	=	3.32	(gm/cc)	(analysis	in	mole	%)
	opx	Na0.00Ca0.06Fe''0.48Mg1.41Fe'''0.02Ti0.00Al0.08Si1.95O6
	G	=	-417175	(J)	H	=	-344188	(J)	S	=	60.16	(J/K)	V	=	8.32	(cc)	Cp	=	33.47	(J/K)
	diopside	clinoenstatit	hedenbergite	alumino-buffo	buffonite	essenite	jadeite
	-47.64	94.04	48.21	3.58	-2.86	4.54	0.13
clinopyroxene	mass	=	2.52	(gm)	density	=	3.3	(gm/cc)	(analysis	in	mole	%)
	cpx	Na0.02Ca0.86Fe''0.20Mg0.78Fe'''0.05Ti0.06Al0.23Si1.81O6
	G	=	-39072.8	(J)	H	=	-32609.2	(J)	S	=	5.33	(J/K)	V	=	0.76	(cc)	Cp	=	2.89	(J/K)
	diopside	clinoenstatit	hedenbergite	alumino-buffo	buffonite	essenite	jadeite
	47.2	12.49	19.55	13.38	-2.14	7.53	1.99
feldspar	mass	=	54.98	(gm)	density	=	2.66	(gm/cc)	(analysis	in	mole	%)
	K0.01Na0.35Ca0.64Al1.64Si2.36O8
	G	=	-923554	(J)	H	=	-774413	(J)	S	=	122.94	(J/K)	V	=	20.71	(cc)	Cp	=	66.38	(J/K)
	albite	anorthite	sanidine
	34.85	63.99	1.16
spinel	mass	=	0.05	(gm)	density	=	4.65	(gm/cc)	(analysis	in	mole	%)
	Fe''1.16Mg0.29Fe'''0.93Al0.17Cr0.00Ti0.45O4
	G	=	-415.89	(J)	H	=	-295.45	(J)	S	=	0.1	(J/K)	V	=	0.01	(cc)	Cp	=	0.05	(J/K)
	chromite	hercynite	magnetite	spinel	ulvospinel
	0	-20.74	46.44	29.11	45.19
rhm-oxide	mass	=	0.26	(gm)	density	=	4.47	(gm/cc)	(analysis	in	mole	%)
	Mn0.02Fe''0.57Mg0.25Fe'''0.18Al0.12Ti0.85O3
	G	=	-2789.28	(J)	H	=	-2169.88	(J)	S	=	0.51	(J/K)	V	=	0.06	(cc)	Cp	=	0.25	(J/K)
	geikielite	hematite	ilmenite	pyrophanite	corundum
	25.34	9.13	57.37	2.29	5.86
water	mass	=	0.5	(gm)	density	=	0.02	(gm/cc)
	H2O
	G	=	-12564.3	(J)	H	=	-5754.95	(J)	S	=	5.61	(J/K)	V	=	27.75	(cc)	Cp	=	1.26	(J/K)
Total	solids	mass	=	100.01	(gm)	density	=	1.62	(gm/cc)
	G	=	-1.593e+06	(J)	H	=	-1.32005e+06	(J)	S	=	224.99	(J/K)	V	=	61.67	(cc)	Cp	=	120.6	(J/K)
Viscosity	of	the	System	cannot	be	computed.
System	mass	=	100.01	(gm)	density	=	1.62	(gm/cc)
	G	=	-1.593e+06	(J)	H	=	-1.32005e+06	(J)	S	=	224.99	(J/K)	V	=	61.67	(cc)	Cp	=	120.6	(J/K)
**********----------**********
Title:	Dummy	Title
T	=	930	(C)	P	=	0.1	(kbars)	log(10)	f	O2	=	-11.75	delta	HM	=	-5.41	NNO	=	-0.39	QFM	=	0.27	COH	=	2.17	IW	=	4.08
Constraint	Flags:
olivine	mass	=	14.04	(gm)	density	=	3.46	(gm/cc)	(analysis	in	mole	%)
	(Ca0.00Mg0.71Fe''0.28Mn0.01Co0.00Ni0.00)2SiO4
	G	=	-196996	(J)	H	=	-160685	(J)	S	=	30.18	(J/K)	V	=	4.06	(cc)	Cp	=	16.27	(J/K)
	tephroite	fayalite	co-olivine	ni-olivine	monticellite	forsterite
	1.18	27.95	0	0	0.5	70.38
orthopyroxene	mass	=	27.61	(gm)	density	=	3.32	(gm/cc)	(analysis	in	mole	%)
	opx	Na0.00Ca0.06Fe''0.48Mg1.41Fe'''0.02Ti0.00Al0.08Si1.95O6
	G	=	-416013	(J)	H	=	-344056	(J)	S	=	59.81	(J/K)	V	=	8.31	(cc)	Cp	=	33.4	(J/K)
	diopside	clinoenstatit	hedenbergite	alumino-buffo	buffonite	essenite	jadeite
	-47.84	94.19	48.3	3.58	-2.87	4.51	0.13
clinopyroxene	mass	=	2.57	(gm)	density	=	3.3	(gm/cc)	(analysis	in	mole	%)
	cpx	Na0.02Ca0.86Fe''0.19Mg0.78Fe'''0.05Ti0.06Al0.23Si1.81O6
	G	=	-39740.3	(J)	H	=	-33246.9	(J)	S	=	5.4	(J/K)	V	=	0.78	(cc)	Cp	=	2.94	(J/K)
	diopside	clinoenstatit	hedenbergite	alumino-buffo	buffonite	essenite	jadeite
	47.78	12.01	19.26	13.62	-2.13	7.46	2.02
feldspar	mass	=	54.98	(gm)	density	=	2.66	(gm/cc)	(analysis	in	mole	%)
	K0.01Na0.35Ca0.64Al1.64Si2.36O8
	G	=	-922273	(J)	H	=	-775030	(J)	S	=	122.38	(J/K)	V	=	20.7	(cc)	Cp	=	66.29	(J/K)
	albite	anorthite	sanidine
	34.85	63.99	1.16
spinel	mass	=	0.06	(gm)	density	=	4.66	(gm/cc)	(analysis	in	mole	%)
	Fe''1.16Mg0.28Fe'''0.95Al0.17Cr0.00Ti0.44O4
	G	=	-506.37	(J)	H	=	-360.44	(J)	S	=	0.12	(J/K)	V	=	0.01	(cc)	Cp	=	0.06	(J/K)
	chromite	hercynite	magnetite	spinel	ulvospinel
	0	-19.94	47.67	28.27	44.01
rhm-oxide	mass	=	0.25	(gm)	density	=	4.47	(gm/cc)	(analysis	in	mole	%)
	Mn0.02Fe''0.58Mg0.25Fe'''0.18Al0.12Ti0.85O3
	G	=	-2718.15	(J)	H	=	-2120.38	(J)	S	=	0.5	(J/K)	V	=	0.06	(cc)	Cp	=	0.25	(J/K)
	geikielite	hematite	ilmenite	pyrophanite	corundum
	25.17	9.14	57.61	2.28	5.8
water	mass	=	0.5	(gm)	density	=	0.02	(gm/cc)
	H2O
	G	=	-12508.2	(J)	H	=	-5767.49	(J)	S	=	5.6	(J/K)	V	=	27.51	(cc)	Cp	=	1.25	(J/K)
Total	solids	mass	=	100.01	(gm)	density	=	1.63	(gm/cc)
	G	=	-1.59076e+06	(J)	H	=	-1.32127e+06	(J)	S	=	223.99	(J/K)	V	=	61.42	(cc)	Cp	=	120.46	(J/K)
Viscosity	of	the	System	cannot	be	computed.
System	mass	=	100.01	(gm)	density	=	1.63	(gm/cc)
	G	=	-1.59076e+06	(J)	H	=	-1.32127e+06	(J)	S	=	223.99	(J/K)	V	=	61.42	(cc)	Cp	=	120.46	(J/K)
**********----------**********
Title:	Dummy	Title
T	=	920	(C)	P	=	0.1	(kbars)	log(10)	f	O2	=	-11.91	delta	HM	=	-5.4	NNO	=	-0.38	QFM	=	0.28	COH	=	2.16	IW	=	4.11
Constraint	Flags:
olivine	mass	=	13.82	(gm)	density	=	3.46	(gm/cc)	(analysis	in	mole	%)
	(Ca0.00Mg0.71Fe''0.28Mn0.01Co0.00Ni0.00)2SiO4
	G	=	-193516	(J)	H	=	-158225	(J)	S	=	29.58	(J/K)	V	=	3.99	(cc)	Cp	=	15.99	(J/K)
	tephroite	fayalite	co-olivine	ni-olivine	monticellite	forsterite
	1.22	28.03	0	0	0.47	70.28
orthopyroxene	mass	=	28.13	(gm)	density	=	3.33	(gm/cc)	(analysis	in	mole	%)
	opx	Na0.00Ca0.06Fe''0.49Mg1.41Fe'''0.02Ti0.00Al0.08Si1.95O6
	G	=	-422985	(J)	H	=	-350641	(J)	S	=	60.63	(J/K)	V	=	8.46	(cc)	Cp	=	33.98	(J/K)
	diopside	clinoenstatit	hedenbergite	alumino-buffo	buffonite	essenite	jadeite
	-48.16	94.32	48.55	3.56	-2.88	4.48	0.13
clinopyroxene	mass	=	1.77	(gm)	density	=	3.3	(gm/cc)	(analysis	in	mole	%)
	cpx	Na0.02Ca0.86Fe''0.19Mg0.77Fe'''0.05Ti0.06Al0.23Si1.81O6
	G	=	-27415.6	(J)	H	=	-22990.8	(J)	S	=	3.71	(J/K)	V	=	0.54	(cc)	Cp	=	2.03	(J/K)
	diopside	clinoenstatit	hedenbergite	alumino-buffo	buffonite	essenite	jadeite
	48.39	11.62	19.06	13.64	-2.14	7.4	2.04
clinopyroxene	mass	=	1.04	(gm)	density	=	3.48	(gm/cc)	(analysis	in	mole	%)
	cpx	Na0.02Ca0.95Fe''0.15Mg0.47Fe'''0.08Ti0.37Al0.73Si1.24O6
	G	=	-15907.4	(J)	H	=	-13370.6	(J)	S	=	2.13	(J/K)	V	=	0.3	(cc)	Cp	=	1.16	(J/K)
	diopside	clinoenstatit	hedenbergite	alumino-buffo	buffonite	essenite	jadeite
	3.64	3.5	15.29	68.04	5.05	2.48	1.99
feldspar	mass	=	54.64	(gm)	density	=	2.66	(gm/cc)	(analysis	in	mole	%)
	K0.01Na0.35Ca0.64Al1.64Si2.36O8
	G	=	-915409	(J)	H	=	-770917	(J)	S	=	121.1	(J/K)	V	=	20.57	(cc)	Cp	=	65.81	(J/K)
	albite	anorthite	sanidine
	35.05	63.79	1.17
spinel	mass	=	0.1	(gm)	density	=	4.67	(gm/cc)	(analysis	in	mole	%)
	Fe''1.15Mg0.27Fe'''0.98Al0.17Cr0.00Ti0.43O4
	G	=	-835.73	(J)	H	=	-595.8	(J)	S	=	0.2	(J/K)	V	=	0.02	(cc)	Cp	=	0.09	(J/K)
	chromite	hercynite	magnetite	spinel	ulvospinel
	0	-18.97	49.13	27.23	42.61
water	mass	=	0.5	(gm)	density	=	0.02	(gm/cc)
	H2O
	G	=	-12452.2	(J)	H	=	-5780.02	(J)	S	=	5.59	(J/K)	V	=	27.26	(cc)	Cp	=	1.25	(J/K)
Total	solids	mass	=	100.01	(gm)	density	=	1.64	(gm/cc)
	G	=	-1.58852e+06	(J)	H	=	-1.32252e+06	(J)	S	=	222.94	(J/K)	V	=	61.14	(cc)	Cp	=	120.31	(J/K)
Viscosity	of	the	System	cannot	be	computed.
System	mass	=	100.01	(gm)	density	=	1.64	(gm/cc)
	G	=	-1.58852e+06	(J)	H	=	-1.32252e+06	(J)	S	=	222.94	(J/K)	V	=	61.14	(cc)	Cp	=	120.31	(J/K)
**********----------**********
Title:	Dummy	Title
T	=	910	(C)	P	=	0.1	(kbars)	log(10)	f	O2	=	-12.06	delta	HM	=	-5.38	NNO	=	-0.35	QFM	=	0.3	COH	=	2.17	IW	=	4.15
Constraint	Flags:
olivine	mass	=	13.81	(gm)	density	=	3.46	(gm/cc)	(analysis	in	mole	%)
	(Ca0.00Mg0.71Fe''0.28Mn0.01Co0.00Ni0.00)2SiO4
	G	=	-193184	(J)	H	=	-158362	(J)	S	=	29.43	(J/K)	V	=	3.99	(cc)	Cp	=	15.97	(J/K)
	tephroite	fayalite	co-olivine	ni-olivine	monticellite	forsterite
	1.22	28	0	0	0.45	70.34
orthopyroxene	mass	=	28.09	(gm)	density	=	3.33	(gm/cc)	(analysis	in	mole	%)
	opx	Na0.00Ca0.05Fe''0.49Mg1.41Fe'''0.02Ti0.00Al0.08Si1.95O6
	G	=	-421730	(J)	H	=	-350435	(J)	S	=	60.26	(J/K)	V	=	8.44	(cc)	Cp	=	33.89	(J/K)
	diopside	clinoenstatit	hedenbergite	alumino-buffo	buffonite	essenite	jadeite
	-48.34	94.45	48.66	3.54	-2.89	4.46	0.13
clinopyroxene	mass	=	1.8	(gm)	density	=	3.3	(gm/cc)	(analysis	in	mole	%)
	cpx	Na0.02Ca0.87Fe''0.19Mg0.77Fe'''0.05Ti0.06Al0.23Si1.81O6
	G	=	-27898.5	(J)	H	=	-23451.6	(J)	S	=	3.76	(J/K)	V	=	0.55	(cc)	Cp	=	2.07	(J/K)
	diopside	clinoenstatit	hedenbergite	alumino-buffo	buffonite	essenite	jadeite
	49.23	11.33	18.85	13.37	-2.24	7.41	2.05
clinopyroxene	mass	=	1.06	(gm)	density	=	3.49	(gm/cc)	(analysis	in	mole	%)
	cpx	Na0.02Ca0.95Fe''0.15Mg0.47Fe'''0.07Ti0.37Al0.73Si1.24O6
	G	=	-16076.2	(J)	H	=	-13544.2	(J)	S	=	2.14	(J/K)	V	=	0.3	(cc)	Cp	=	1.17	(J/K)
	diopside	clinoenstatit	hedenbergite	alumino-buffo	buffonite	essenite	jadeite
	3.31	3.34	15.2	68.75	4.98	2.44	1.98
feldspar	mass	=	54.64	(gm)	density	=	2.66	(gm/cc)	(analysis	in	mole	%)
	K0.01Na0.35Ca0.64Al1.64Si2.36O8
	G	=	-914158	(J)	H	=	-771539	(J)	S	=	120.54	(J/K)	V	=	20.57	(cc)	Cp	=	65.73	(J/K)
	albite	anorthite	sanidine
	35.05	63.79	1.17
spinel	mass	=	0.11	(gm)	density	=	4.69	(gm/cc)	(analysis	in	mole	%)
	Fe''1.14Mg0.26Fe'''1.03Al0.17Cr0.00Ti0.40O4
	G	=	-852.96	(J)	H	=	-608.58	(J)	S	=	0.21	(J/K)	V	=	0.02	(cc)	Cp	=	0.1	(J/K)
	chromite	hercynite	magnetite	spinel	ulvospinel
	0	-17.76	51.49	26.04	40.23
water	mass	=	0.5	(gm)	density	=	0.02	(gm/cc)
	H2O
	G	=	-12396.4	(J)	H	=	-5792.52	(J)	S	=	5.58	(J/K)	V	=	27.02	(cc)	Cp	=	1.25	(J/K)
Total	solids	mass	=	100.01	(gm)	density	=	1.64	(gm/cc)
	G	=	-1.5863e+06	(J)	H	=	-1323733	(J)	S	=	221.92	(J/K)	V	=	60.89	(cc)	Cp	=	120.17	(J/K)
Viscosity	of	the	System	cannot	be	computed.
System	mass	=	100.01	(gm)	density	=	1.64	(gm/cc)
	G	=	-1.5863e+06	(J)	H	=	-1323733	(J)	S	=	221.92	(J/K)	V	=	60.89	(cc)	Cp	=	120.17	(J/K)
**********----------**********
Title:	Dummy	Title
T	=	900	(C)	P	=	0.1	(kbars)	log(10)	f	O2	=	-12.21	delta	HM	=	-5.37	NNO	=	-0.32	QFM	=	0.32	COH	=	2.18	IW	=	4.19
Constraint	Flags:
olivine	mass	=	13.81	(gm)	density	=	3.46	(gm/cc)	(analysis	in	mole	%)
	(Ca0.00Mg0.71Fe''0.28Mn0.01Co0.00Ni0.00)2SiO4
	G	=	-192849	(J)	H	=	-158496	(J)	S	=	29.28	(J/K)	V	=	3.99	(cc)	Cp	=	15.94	(J/K)
	tephroite	fayalite	co-olivine	ni-olivine	monticellite	forsterite
	1.22	27.96	0	0	0.42	70.4
orthopyroxene	mass	=	28.05	(gm)	density	=	3.33	(gm/cc)	(analysis	in	mole	%)
	opx	Na0.00Ca0.05Fe''0.49Mg1.41Fe'''0.02Ti0.00Al0.08Si1.95O6
	G	=	-420480	(J)	H	=	-350228	(J)	S	=	59.88	(J/K)	V	=	8.42	(cc)	Cp	=	33.8	(J/K)
	diopside	clinoenstatit	hedenbergite	alumino-buffo	buffonite	essenite	jadeite
	-48.53	94.58	48.77	3.52	-2.9	4.44	0.12
clinopyroxene	mass	=	1.84	(gm)	density	=	3.3	(gm/cc)	(analysis	in	mole	%)
	cpx	Na0.02Ca0.87Fe''0.19Mg0.78Fe'''0.05Ti0.05Al0.23Si1.82O6
	G	=	-28378.8	(J)	H	=	-23912.1	(J)	S	=	3.81	(J/K)	V	=	0.56	(cc)	Cp	=	2.1	(J/K)
	diopside	clinoenstatit	hedenbergite	alumino-buffo	buffonite	essenite	jadeite
	50.08	11.06	18.63	13.09	-2.35	7.42	2.06
clinopyroxene	mass	=	1.07	(gm)	density	=	3.49	(gm/cc)	(analysis	in	mole	%)
	cpx	Na0.02Ca0.95Fe''0.15Mg0.47Fe'''0.07Ti0.37Al0.74Si1.23O6
	G	=	-16217	(J)	H	=	-13694.9	(J)	S	=	2.15	(J/K)	V	=	0.31	(cc)	Cp	=	1.18	(J/K)
	diopside	clinoenstatit	hedenbergite	alumino-buffo	buffonite	essenite	jadeite
	2.98	3.19	15.1	69.49	4.9	2.38	1.97
feldspar	mass	=	54.64	(gm)	density	=	2.66	(gm/cc)	(analysis	in	mole	%)
	K0.01Na0.35Ca0.64Al1.64Si2.36O8
	G	=	-912934	(J)	H	=	-772178	(J)	S	=	119.98	(J/K)	V	=	20.56	(cc)	Cp	=	65.65	(J/K)
	albite	anorthite	sanidine
	35.05	63.79	1.17
spinel	mass	=	0.11	(gm)	density	=	4.7	(gm/cc)	(analysis	in	mole	%)
	Fe''1.13Mg0.25Fe'''1.07Al0.17Cr0.00Ti0.38O4
	G	=	-882.6	(J)	H	=	-630.39	(J)	S	=	0.21	(J/K)	V	=	0.02	(cc)	Cp	=	0.1	(J/K)
	chromite	hercynite	magnetite	spinel	ulvospinel
	0	-16.64	53.72	24.94	37.98
water	mass	=	0.5	(gm)	density	=	0.02	(gm/cc)
	H2O
	G	=	-12340.6	(J)	H	=	-5805	(J)	S	=	5.57	(J/K)	V	=	26.78	(cc)	Cp	=	1.25	(J/K)
Total	solids	mass	=	100.01	(gm)	density	=	1.65	(gm/cc)
	G	=	-1.58408e+06	(J)	H	=	-1.32494e+06	(J)	S	=	220.89	(J/K)	V	=	60.63	(cc)	Cp	=	120.02	(J/K)
Viscosity	of	the	System	cannot	be	computed.
System	mass	=	100.01	(gm)	density	=	1.65	(gm/cc)
	G	=	-1.58408e+06	(J)	H	=	-1.32494e+06	(J)	S	=	220.89	(J/K)	V	=	60.63	(cc)	Cp	=	120.02	(J/K)
**********----------**********
Title:	Dummy	Title
T	=	890	(C)	P	=	0.1	(kbars)	log(10)	f	O2	=	-12.37	delta	HM	=	-5.35	NNO	=	-0.3	QFM	=	0.34	COH	=	2.18	IW	=	4.23
Constraint	Flags:
olivine	mass	=	13.8	(gm)	density	=	3.47	(gm/cc)	(analysis	in	mole	%)
	(Ca0.00Mg0.71Fe''0.28Mn0.01Co0.00Ni0.00)2SiO4
	G	=	-192512	(J)	H	=	-158626	(J)	S	=	29.13	(J/K)	V	=	3.98	(cc)	Cp	=	15.91	(J/K)
	tephroite	fayalite	co-olivine	ni-olivine	monticellite	forsterite
	1.22	27.92	0	0	0.4	70.46
orthopyroxene	mass	=	28.01	(gm)	density	=	3.33	(gm/cc)	(analysis	in	mole	%)
	opx	Na0.00Ca0.05Fe''0.49Mg1.41Fe'''0.02Ti0.00Al0.08Si1.95O6
	G	=	-419239	(J)	H	=	-350024	(J)	S	=	59.51	(J/K)	V	=	8.41	(cc)	Cp	=	33.72	(J/K)
	diopside	clinoenstatit	hedenbergite	alumino-buffo	buffonite	essenite	jadeite
	-48.71	94.71	48.87	3.49	-2.91	4.42	0.12
clinopyroxene	mass	=	1.87	(gm)	density	=	3.3	(gm/cc)	(analysis	in	mole	%)
	cpx	Na0.02Ca0.87Fe''0.18Mg0.78Fe'''0.05Ti0.05Al0.22Si1.82O6
	G	=	-28850.1	(J)	H	=	-24367.1	(J)	S	=	3.85	(J/K)	V	=	0.57	(cc)	Cp	=	2.13	(J/K)
	diopside	clinoenstatit	hedenbergite	alumino-buffo	buffonite	essenite	jadeite
	50.94	10.79	18.42	12.82	-2.45	7.41	2.07
clinopyroxene	mass	=	1.07	(gm)	density	=	3.49	(gm/cc)	(analysis	in	mole	%)
	cpx	Na0.02Ca0.95Fe''0.15Mg0.46Fe'''0.07Ti0.38Al0.75Si1.23O6
	G	=	-16340.7	(J)	H	=	-13831.7	(J)	S	=	2.16	(J/K)	V	=	0.31	(cc)	Cp	=	1.19	(J/K)
	diopside	clinoenstatit	hedenbergite	alumino-buffo	buffonite	essenite	jadeite
	2.64	3.04	15	70.23	4.81	2.32	1.96
feldspar	mass	=	54.64	(gm)	density	=	2.66	(gm/cc)	(analysis	in	mole	%)
	K0.01Na0.35Ca0.64Al1.64Si2.36O8
	G	=	-911731	(J)	H	=	-772829	(J)	S	=	119.42	(J/K)	V	=	20.56	(cc)	Cp	=	65.57	(J/K)
	albite	anorthite	sanidine
	35.05	63.79	1.17
spinel	mass	=	0.12	(gm)	density	=	4.72	(gm/cc)	(analysis	in	mole	%)
	Fe''1.12Mg0.24Fe'''1.12Al0.17Cr0.00Ti0.36O4
	G	=	-921.14	(J)	H	=	-658.75	(J)	S	=	0.23	(J/K)	V	=	0.02	(cc)	Cp	=	0.11	(J/K)
	chromite	hercynite	magnetite	spinel	ulvospinel
	0	-15.61	55.83	23.93	35.84
water	mass	=	0.5	(gm)	density	=	0.02	(gm/cc)
	H2O
	G	=	-12284.9	(J)	H	=	-5817.46	(J)	S	=	5.56	(J/K)	V	=	26.53	(cc)	Cp	=	1.24	(J/K)
Total	solids	mass	=	100.01	(gm)	density	=	1.66	(gm/cc)
	G	=	-1.58188e+06	(J)	H	=	-1.32615e+06	(J)	S	=	219.86	(J/K)	V	=	60.38	(cc)	Cp	=	119.88	(J/K)
Viscosity	of	the	System	cannot	be	computed.
System	mass	=	100.01	(gm)	density	=	1.66	(gm/cc)
	G	=	-1.58188e+06	(J)	H	=	-1.32615e+06	(J)	S	=	219.86	(J/K)	V	=	60.38	(cc)	Cp	=	119.88	(J/K)
**********----------**********
Title:	Dummy	Title
T	=	880	(C)	P	=	0.1	(kbars)	log(10)	f	O2	=	-12.54	delta	HM	=	-5.34	NNO	=	-0.28	QFM	=	0.36	COH	=	2.18	IW	=	4.26
Constraint	Flags:
olivine	mass	=	13.79	(gm)	density	=	3.47	(gm/cc)	(analysis	in	mole	%)
	(Ca0.00Mg0.71Fe''0.28Mn0.01Co0.00Ni0.00)2SiO4
	G	=	-192174	(J)	H	=	-158754	(J)	S	=	28.98	(J/K)	V	=	3.98	(cc)	Cp	=	15.88	(J/K)
	tephroite	fayalite	co-olivine	ni-olivine	monticellite	forsterite
	1.22	27.88	0	0	0.38	70.52
orthopyroxene	mass	=	27.97	(gm)	density	=	3.33	(gm/cc)	(analysis	in	mole	%)
	opx	Na0.00Ca0.05Fe''0.49Mg1.41Fe'''0.01Ti0.00Al0.08Si1.95O6
	G	=	-418009	(J)	H	=	-349823	(J)	S	=	59.13	(J/K)	V	=	8.39	(cc)	Cp	=	33.63	(J/K)
	diopside	clinoenstatit	hedenbergite	alumino-buffo	buffonite	essenite	jadeite
	-48.88	94.84	48.98	3.47	-2.92	4.39	0.12
clinopyroxene	mass	=	1.9	(gm)	density	=	3.3	(gm/cc)	(analysis	in	mole	%)
	cpx	Na0.02Ca0.87Fe''0.18Mg0.78Fe'''0.05Ti0.05Al0.22Si1.83O6
	G	=	-29309.3	(J)	H	=	-24813.7	(J)	S	=	3.9	(J/K)	V	=	0.58	(cc)	Cp	=	2.17	(J/K)
	diopside	clinoenstatit	hedenbergite	alumino-buffo	buffonite	essenite	jadeite
	51.8	10.52	18.2	12.56	-2.56	7.41	2.08
clinopyroxene	mass	=	1.08	(gm)	density	=	3.49	(gm/cc)	(analysis	in	mole	%)
	cpx	Na0.02Ca0.95Fe''0.15Mg0.46Fe'''0.07Ti0.38Al0.75Si1.22O6
	G	=	-16454.6	(J)	H	=	-13960.7	(J)	S	=	2.16	(J/K)	V	=	0.31	(cc)	Cp	=	1.2	(J/K)
	diopside	clinoenstatit	hedenbergite	alumino-buffo	buffonite	essenite	jadeite
	2.31	2.89	14.9	70.98	4.71	2.26	1.95
feldspar	mass	=	54.64	(gm)	density	=	2.66	(gm/cc)	(analysis	in	mole	%)
	K0.01Na0.35Ca0.64Al1.64Si2.36O8
	G	=	-910544	(J)	H	=	-773488	(J)	S	=	118.85	(J/K)	V	=	20.55	(cc)	Cp	=	65.5	(J/K)
	albite	anorthite	sanidine
	35.05	63.79	1.17
spinel	mass	=	0.12	(gm)	density	=	4.73	(gm/cc)	(analysis	in	mole	%)
	Fe''1.11Mg0.23Fe'''1.16Al0.17Cr0.00Ti0.34O4
	G	=	-965.97	(J)	H	=	-691.83	(J)	S	=	0.24	(J/K)	V	=	0.03	(cc)	Cp	=	0.11	(J/K)
	chromite	hercynite	magnetite	spinel	ulvospinel
	0	-14.66	57.83	23	33.83
water	mass	=	0.5	(gm)	density	=	0.02	(gm/cc)
	H2O
	G	=	-12229.4	(J)	H	=	-5829.9	(J)	S	=	5.55	(J/K)	V	=	26.29	(cc)	Cp	=	1.24	(J/K)
Total	solids	mass	=	100.01	(gm)	density	=	1.66	(gm/cc)
	G	=	-1.57969e+06	(J)	H	=	-1.32736e+06	(J)	S	=	218.81	(J/K)	V	=	60.12	(cc)	Cp	=	119.73	(J/K)
Viscosity	of	the	System	cannot	be	computed.
System	mass	=	100.01	(gm)	density	=	1.66	(gm/cc)
	G	=	-1.57969e+06	(J)	H	=	-1.32736e+06	(J)	S	=	218.81	(J/K)	V	=	60.12	(cc)	Cp	=	119.73	(J/K)
**********----------**********
Title:	Dummy	Title
T	=	870	(C)	P	=	0.1	(kbars)	log(10)	f	O2	=	-12.71	delta	HM	=	-5.33	NNO	=	-0.26	QFM	=	0.37	COH	=	2.18	IW	=	4.29
Constraint	Flags:
olivine	mass	=	13.79	(gm)	density	=	3.47	(gm/cc)	(analysis	in	mole	%)
	(Ca0.00Mg0.71Fe''0.28Mn0.01Co0.00Ni0.00)2SiO4
	G	=	-191835	(J)	H	=	-158881	(J)	S	=	28.83	(J/K)	V	=	3.98	(cc)	Cp	=	15.86	(J/K)
	tephroite	fayalite	co-olivine	ni-olivine	monticellite	forsterite
	1.22	27.83	0	0	0.36	70.59
orthopyroxene	mass	=	27.93	(gm)	density	=	3.33	(gm/cc)	(analysis	in	mole	%)
	opx	Na0.00Ca0.05Fe''0.49Mg1.41Fe'''0.01Ti0.00Al0.08Si1.95O6
	G	=	-416790	(J)	H	=	-349628	(J)	S	=	58.75	(J/K)	V	=	8.38	(cc)	Cp	=	33.54	(J/K)
	diopside	clinoenstatit	hedenbergite	alumino-buffo	buffonite	essenite	jadeite
	-49.06	94.96	49.09	3.45	-2.93	4.36	0.12
clinopyroxene	mass	=	1.93	(gm)	density	=	3.29	(gm/cc)	(analysis	in	mole	%)
	cpx	Na0.02Ca0.88Fe''0.18Mg0.78Fe'''0.05Ti0.05Al0.22Si1.83O6
	G	=	-29755.2	(J)	H	=	-25250.8	(J)	S	=	3.94	(J/K)	V	=	0.59	(cc)	Cp	=	2.2	(J/K)
	diopside	clinoenstatit	hedenbergite	alumino-buffo	buffonite	essenite	jadeite
	52.66	10.26	17.98	12.3	-2.67	7.39	2.08
clinopyroxene	mass	=	1.09	(gm)	density	=	3.5	(gm/cc)	(analysis	in	mole	%)
	cpx	Na0.02Ca0.95Fe''0.15Mg0.46Fe'''0.07Ti0.38Al0.76Si1.21O6
	G	=	-16563.1	(J)	H	=	-14085.6	(J)	S	=	2.17	(J/K)	V	=	0.31	(cc)	Cp	=	1.2	(J/K)
	diopside	clinoenstatit	hedenbergite	alumino-buffo	buffonite	essenite	jadeite
	1.98	2.76	14.81	71.73	4.61	2.19	1.93
feldspar	mass	=	54.64	(gm)	density	=	2.66	(gm/cc)	(analysis	in	mole	%)
	K0.01Na0.35Ca0.64Al1.64Si2.36O8
	G	=	-909370	(J)	H	=	-774153	(J)	S	=	118.29	(J/K)	V	=	20.55	(cc)	Cp	=	65.42	(J/K)
	albite	anorthite	sanidine
	35.05	63.79	1.17
spinel	mass	=	0.13	(gm)	density	=	4.74	(gm/cc)	(analysis	in	mole	%)
	Fe''1.10Mg0.22Fe'''1.19Al0.17Cr0.00Ti0.32O4
	G	=	-1015.14	(J)	H	=	-728.26	(J)	S	=	0.25	(J/K)	V	=	0.03	(cc)	Cp	=	0.12	(J/K)
	chromite	hercynite	magnetite	spinel	ulvospinel
	0	-13.78	59.72	22.13	31.93
water	mass	=	0.5	(gm)	density	=	0.02	(gm/cc)
	H2O
	G	=	-12174	(J)	H	=	-5842.32	(J)	S	=	5.54	(J/K)	V	=	26.04	(cc)	Cp	=	1.24	(J/K)
Total	solids	mass	=	100.01	(gm)	density	=	1.67	(gm/cc)
	G	=	-1.5775e+06	(J)	H	=	-1.32857e+06	(J)	S	=	217.76	(J/K)	V	=	59.87	(cc)	Cp	=	119.58	(J/K)
Viscosity	of	the	System	cannot	be	computed.
System	mass	=	100.01	(gm)	density	=	1.67	(gm/cc)
	G	=	-1.5775e+06	(J)	H	=	-1.32857e+06	(J)	S	=	217.76	(J/K)	V	=	59.87	(cc)	Cp	=	119.58	(J/K)
**********----------**********
Title:	Dummy	Title
T	=	860	(C)	P	=	0.1	(kbars)	log(10)	f	O2	=	-12.89	delta	HM	=	-5.33	NNO	=	-0.25	QFM	=	0.38	COH	=	2.17	IW	=	4.32
Constraint	Flags:
olivine	mass	=	13.78	(gm)	density	=	3.47	(gm/cc)	(analysis	in	mole	%)
	(Ca0.00Mg0.71Fe''0.28Mn0.01Co0.00Ni0.00)2SiO4
	G	=	-191497	(J)	H	=	-159006	(J)	S	=	28.67	(J/K)	V	=	3.97	(cc)	Cp	=	15.83	(J/K)
	tephroite	fayalite	co-olivine	ni-olivine	monticellite	forsterite
	1.22	27.79	0	0	0.34	70.65
orthopyroxene	mass	=	27.89	(gm)	density	=	3.34	(gm/cc)	(analysis	in	mole	%)
	opx	Na0.00Ca0.05Fe''0.49Mg1.41Fe'''0.01Ti0.00Al0.08Si1.95O6
	G	=	-415584	(J)	H	=	-349438	(J)	S	=	58.37	(J/K)	V	=	8.36	(cc)	Cp	=	33.46	(J/K)
	diopside	clinoenstatit	hedenbergite	alumino-buffo	buffonite	essenite	jadeite
	-49.24	95.09	49.2	3.44	-2.94	4.33	0.12
clinopyroxene	mass	=	1.96	(gm)	density	=	3.29	(gm/cc)	(analysis	in	mole	%)
	cpx	Na0.02Ca0.88Fe''0.18Mg0.78Fe'''0.05Ti0.05Al0.22Si1.83O6
	G	=	-30187.3	(J)	H	=	-25678.1	(J)	S	=	3.98	(J/K)	V	=	0.59	(cc)	Cp	=	2.23	(J/K)
	diopside	clinoenstatit	hedenbergite	alumino-buffo	buffonite	essenite	jadeite
	53.52	10	17.75	12.05	-2.78	7.37	2.09
clinopyroxene	mass	=	1.1	(gm)	density	=	3.5	(gm/cc)	(analysis	in	mole	%)
	cpx	Na0.02Ca0.95Fe''0.15Mg0.45Fe'''0.07Ti0.38Al0.77Si1.21O6
	G	=	-16668.9	(J)	H	=	-14208.6	(J)	S	=	2.17	(J/K)	V	=	0.31	(cc)	Cp	=	1.21	(J/K)
	diopside	clinoenstatit	hedenbergite	alumino-buffo	buffonite	essenite	jadeite
	1.64	2.62	14.71	72.49	4.5	2.11	1.92
feldspar	mass	=	54.64	(gm)	density	=	2.66	(gm/cc)	(analysis	in	mole	%)
	K0.01Na0.35Ca0.64Al1.64Si2.36O8
	G	=	-908207	(J)	H	=	-774821	(J)	S	=	117.71	(J/K)	V	=	20.54	(cc)	Cp	=	65.34	(J/K)
	albite	anorthite	sanidine
	35.04	63.79	1.17
spinel	mass	=	0.14	(gm)	density	=	4.76	(gm/cc)	(analysis	in	mole	%)
	Fe''1.09Mg0.21Fe'''1.23Al0.17Cr0.00Ti0.30O4
	G	=	-1067.18	(J)	H	=	-767	(J)	S	=	0.26	(J/K)	V	=	0.03	(cc)	Cp	=	0.13	(J/K)
	chromite	hercynite	magnetite	spinel	ulvospinel
	0	-12.97	61.51	21.32	30.13
water	mass	=	0.5	(gm)	density	=	0.02	(gm/cc)
	H2O
	G	=	-12118.6	(J)	H	=	-5854.72	(J)	S	=	5.53	(J/K)	V	=	25.8	(cc)	Cp	=	1.24	(J/K)
Total	solids	mass	=	100.01	(gm)	density	=	1.68	(gm/cc)
	G	=	-1.57533e+06	(J)	H	=	-1.32977e+06	(J)	S	=	216.7	(J/K)	V	=	59.61	(cc)	Cp	=	119.44	(J/K)
Viscosity	of	the	System	cannot	be	computed.
System	mass	=	100.01	(gm)	density	=	1.68	(gm/cc)
	G	=	-1.57533e+06	(J)	H	=	-1.32977e+06	(J)	S	=	216.7	(J/K)	V	=	59.61	(cc)	Cp	=	119.44	(J/K)
**********----------**********
Title:	Dummy	Title
T	=	850	(C)	P	=	0.1	(kbars)	log(10)	f	O2	=	-13.07	delta	HM	=	-5.32	NNO	=	-0.24	QFM	=	0.39	COH	=	2.17	IW	=	4.35
Constraint	Flags:
olivine	mass	=	13.77	(gm)	density	=	3.47	(gm/cc)	(analysis	in	mole	%)
	(Ca0.00Mg0.71Fe''0.28Mn0.01Co0.00Ni0.00)2SiO4
	G	=	-191160	(J)	H	=	-159131	(J)	S	=	28.52	(J/K)	V	=	3.97	(cc)	Cp	=	15.8	(J/K)
	tephroite	fayalite	co-olivine	ni-olivine	monticellite	forsterite
	1.22	27.74	0	0	0.32	70.72
orthopyroxene	mass	=	27.85	(gm)	density	=	3.34	(gm/cc)	(analysis	in	mole	%)
	opx	Na0.00Ca0.05Fe''0.49Mg1.41Fe'''0.01Ti0.00Al0.08Si1.95O6
	G	=	-414391	(J)	H	=	-349254	(J)	S	=	57.99	(J/K)	V	=	8.35	(cc)	Cp	=	33.37	(J/K)
	diopside	clinoenstatit	hedenbergite	alumino-buffo	buffonite	essenite	jadeite
	-49.41	95.21	49.32	3.42	-2.95	4.3	0.12
clinopyroxene	mass	=	1.99	(gm)	density	=	3.29	(gm/cc)	(analysis	in	mole	%)
	cpx	Na0.02Ca0.88Fe''0.18Mg0.78Fe'''0.04Ti0.04Al0.21Si1.84O6
	G	=	-30606.3	(J)	H	=	-26095.8	(J)	S	=	4.02	(J/K)	V	=	0.6	(cc)	Cp	=	2.26	(J/K)
	diopside	clinoenstatit	hedenbergite	alumino-buffo	buffonite	essenite	jadeite
	54.38	9.75	17.52	11.8	-2.89	7.34	2.1
clinopyroxene	mass	=	1.11	(gm)	density	=	3.5	(gm/cc)	(analysis	in	mole	%)
	cpx	Na0.02Ca0.96Fe''0.15Mg0.45Fe'''0.06Ti0.39Al0.77Si1.20O6
	G	=	-16773.7	(J)	H	=	-14331.1	(J)	S	=	2.17	(J/K)	V	=	0.32	(cc)	Cp	=	1.22	(J/K)
	diopside	clinoenstatit	hedenbergite	alumino-buffo	buffonite	essenite	jadeite
	1.32	2.5	14.61	73.24	4.38	2.04	1.91
feldspar	mass	=	54.64	(gm)	density	=	2.66	(gm/cc)	(analysis	in	mole	%)
	K0.01Na0.35Ca0.64Al1.64Si2.36O8
	G	=	-907053	(J)	H	=	-775492	(J)	S	=	117.14	(J/K)	V	=	20.54	(cc)	Cp	=	65.27	(J/K)
	albite	anorthite	sanidine
	35.04	63.79	1.17
spinel	mass	=	0.15	(gm)	density	=	4.77	(gm/cc)	(analysis	in	mole	%)
	Fe''1.08Mg0.21Fe'''1.26Al0.17Cr0.00Ti0.28O4
	G	=	-1120.96	(J)	H	=	-807.29	(J)	S	=	0.28	(J/K)	V	=	0.03	(cc)	Cp	=	0.13	(J/K)
	chromite	hercynite	magnetite	spinel	ulvospinel
	0	-12.2	63.2	20.56	28.43
water	mass	=	0.5	(gm)	density	=	0.02	(gm/cc)
	H2O
	G	=	-12063.4	(J)	H	=	-5867.1	(J)	S	=	5.52	(J/K)	V	=	25.55	(cc)	Cp	=	1.24	(J/K)
Total	solids	mass	=	100.01	(gm)	density	=	1.68	(gm/cc)
	G	=	-1.57317e+06	(J)	H	=	-1.33098e+06	(J)	S	=	215.64	(J/K)	V	=	59.36	(cc)	Cp	=	119.29	(J/K)
Viscosity	of	the	System	cannot	be	computed.
System	mass	=	100.01	(gm)	density	=	1.68	(gm/cc)
	G	=	-1.57317e+06	(J)	H	=	-1.33098e+06	(J)	S	=	215.64	(J/K)	V	=	59.36	(cc)	Cp	=	119.29	(J/K)
**********----------**********
Title:	Dummy	Title
T	=	840	(C)	P	=	0.1	(kbars)	log(10)	f	O2	=	-13.26	delta	HM	=	-5.32	NNO	=	-0.23	QFM	=	0.4	COH	=	2.16	IW	=	4.37
Constraint	Flags:
olivine	mass	=	13.76	(gm)	density	=	3.47	(gm/cc)	(analysis	in	mole	%)
	(Ca0.00Mg0.71Fe''0.28Mn0.01Co0.00Ni0.00)2SiO4
	G	=	-190824	(J)	H	=	-159255	(J)	S	=	28.36	(J/K)	V	=	3.96	(cc)	Cp	=	15.77	(J/K)
	tephroite	fayalite	co-olivine	ni-olivine	monticellite	forsterite
	1.22	27.7	0	0	0.3	70.78
orthopyroxene	mass	=	27.82	(gm)	density	=	3.34	(gm/cc)	(analysis	in	mole	%)
	opx	Na0.00Ca0.05Fe''0.49Mg1.41Fe'''0.01Ti0.00Al0.08Si1.95O6
	G	=	-413211	(J)	H	=	-349076	(J)	S	=	57.62	(J/K)	V	=	8.33	(cc)	Cp	=	33.29	(J/K)
	diopside	clinoenstatit	hedenbergite	alumino-buffo	buffonite	essenite	jadeite
	-49.59	95.33	49.43	3.4	-2.96	4.27	0.11
clinopyroxene	mass	=	2.01	(gm)	density	=	3.29	(gm/cc)	(analysis	in	mole	%)
	cpx	Na0.02Ca0.88Fe''0.17Mg0.79Fe'''0.04Ti0.04Al0.21Si1.84O6
	G	=	-31012.9	(J)	H	=	-26504.6	(J)	S	=	4.05	(J/K)	V	=	0.61	(cc)	Cp	=	2.29	(J/K)
	diopside	clinoenstatit	hedenbergite	alumino-buffo	buffonite	essenite	jadeite
	55.23	9.49	17.29	11.56	-3	7.31	2.11
clinopyroxene	mass	=	1.11	(gm)	density	=	3.5	(gm/cc)	(analysis	in	mole	%)
	cpx	Na0.02Ca0.96Fe''0.15Mg0.45Fe'''0.06Ti0.39Al0.78Si1.20O6
	G	=	-16878.3	(J)	H	=	-14453.8	(J)	S	=	2.18	(J/K)	V	=	0.32	(cc)	Cp	=	1.23	(J/K)
	diopside	clinoenstatit	hedenbergite	alumino-buffo	buffonite	essenite	jadeite
	0.99	2.37	14.52	74	4.26	1.96	1.89
feldspar	mass	=	54.64	(gm)	density	=	2.66	(gm/cc)	(analysis	in	mole	%)
	K0.01Na0.35Ca0.64Al1.64Si2.36O8
	G	=	-905907	(J)	H	=	-776163	(J)	S	=	116.56	(J/K)	V	=	20.53	(cc)	Cp	=	65.19	(J/K)
	albite	anorthite	sanidine
	35.04	63.79	1.17
spinel	mass	=	0.16	(gm)	density	=	4.78	(gm/cc)	(analysis	in	mole	%)
	Fe''1.07Mg0.20Fe'''1.30Al0.17Cr0.00Ti0.27O4
	G	=	-1175.64	(J)	H	=	-848.49	(J)	S	=	0.29	(J/K)	V	=	0.03	(cc)	Cp	=	0.14	(J/K)
	chromite	hercynite	magnetite	spinel	ulvospinel
	0	-11.49	64.81	19.85	26.83
water	mass	=	0.5	(gm)	density	=	0.02	(gm/cc)
	H2O
	G	=	-12008.3	(J)	H	=	-5879.46	(J)	S	=	5.51	(J/K)	V	=	25.31	(cc)	Cp	=	1.24	(J/K)
Total	solids	mass	=	100.01	(gm)	density	=	1.69	(gm/cc)
	G	=	-1.57102e+06	(J)	H	=	-1.33218e+06	(J)	S	=	214.56	(J/K)	V	=	59.1	(cc)	Cp	=	119.14	(J/K)
Viscosity	of	the	System	cannot	be	computed.
System	mass	=	100.01	(gm)	density	=	1.69	(gm/cc)
	G	=	-1.57102e+06	(J)	H	=	-1.33218e+06	(J)	S	=	214.56	(J/K)	V	=	59.1	(cc)	Cp	=	119.14	(J/K)
**********----------**********
Title:	Dummy	Title
T	=	830	(C)	P	=	0.1	(kbars)	log(10)	f	O2	=	-13.46	delta	HM	=	-5.32	NNO	=	-0.22	QFM	=	0.4	COH	=	2.14	IW	=	4.4
Constraint	Flags:
olivine	mass	=	13.75	(gm)	density	=	3.47	(gm/cc)	(analysis	in	mole	%)
	(Ca0.00Mg0.71Fe''0.28Mn0.01Co0.00Ni0.00)2SiO4
	G	=	-190491	(J)	H	=	-159379	(J)	S	=	28.2	(J/K)	V	=	3.96	(cc)	Cp	=	15.74	(J/K)
	tephroite	fayalite	co-olivine	ni-olivine	monticellite	forsterite
	1.22	27.65	0	0	0.28	70.85
orthopyroxene	mass	=	27.78	(gm)	density	=	3.34	(gm/cc)	(analysis	in	mole	%)
	opx	Na0.00Ca0.04Fe''0.50Mg1.41Fe'''0.01Ti0.00Al0.08Si1.95O6
	G	=	-412045	(J)	H	=	-348905	(J)	S	=	57.24	(J/K)	V	=	8.32	(cc)	Cp	=	33.2	(J/K)
	diopside	clinoenstatit	hedenbergite	alumino-buffo	buffonite	essenite	jadeite
	-49.77	95.45	49.55	3.39	-2.97	4.24	0.11
clinopyroxene	mass	=	2.04	(gm)	density	=	3.29	(gm/cc)	(analysis	in	mole	%)
	cpx	Na0.02Ca0.89Fe''0.17Mg0.79Fe'''0.04Ti0.04Al0.21Si1.85O6
	G	=	-31408.1	(J)	H	=	-26905.2	(J)	S	=	4.08	(J/K)	V	=	0.62	(cc)	Cp	=	2.32	(J/K)
	diopside	clinoenstatit	hedenbergite	alumino-buffo	buffonite	essenite	jadeite
	56.09	9.25	17.05	11.33	-3.11	7.28	2.11
clinopyroxene	mass	=	1.12	(gm)	density	=	3.51	(gm/cc)	(analysis	in	mole	%)
	cpx	Na0.02Ca0.96Fe''0.14Mg0.45Fe'''0.06Ti0.39Al0.79Si1.19O6
	G	=	-16982.9	(J)	H	=	-14577	(J)	S	=	2.18	(J/K)	V	=	0.32	(cc)	Cp	=	1.23	(J/K)
	diopside	clinoenstatit	hedenbergite	alumino-buffo	buffonite	essenite	jadeite
	0.67	2.26	14.43	74.74	4.14	1.88	1.88
feldspar	mass	=	54.65	(gm)	density	=	2.66	(gm/cc)	(analysis	in	mole	%)
	K0.01Na0.35Ca0.64Al1.64Si2.36O8
	G	=	-904767	(J)	H	=	-776834	(J)	S	=	115.97	(J/K)	V	=	20.53	(cc)	Cp	=	65.12	(J/K)
	albite	anorthite	sanidine
	35.04	63.79	1.17
spinel	mass	=	0.16	(gm)	density	=	4.79	(gm/cc)	(analysis	in	mole	%)
	Fe''1.06Mg0.19Fe'''1.33Al0.17Cr0.00Ti0.25O4
	G	=	-1230.53	(J)	H	=	-890.16	(J)	S	=	0.31	(J/K)	V	=	0.03	(cc)	Cp	=	0.15	(J/K)
	chromite	hercynite	magnetite	spinel	ulvospinel
	0	-10.82	66.33	19.19	25.3
water	mass	=	0.5	(gm)	density	=	0.02	(gm/cc)
	H2O
	G	=	-11953.3	(J)	H	=	-5891.8	(J)	S	=	5.49	(J/K)	V	=	25.06	(cc)	Cp	=	1.23	(J/K)
Total	solids	mass	=	100.01	(gm)	density	=	1.7	(gm/cc)
	G	=	-1.56888e+06	(J)	H	=	-1.33338e+06	(J)	S	=	213.48	(J/K)	V	=	58.84	(cc)	Cp	=	119	(J/K)
Viscosity	of	the	System	cannot	be	computed.
System	mass	=	100.01	(gm)	density	=	1.7	(gm/cc)
	G	=	-1.56888e+06	(J)	H	=	-1.33338e+06	(J)	S	=	213.48	(J/K)	V	=	58.84	(cc)	Cp	=	119	(J/K)
**********----------**********
Title:	Dummy	Title
T	=	820	(C)	P	=	0.1	(kbars)	log(10)	f	O2	=	-13.66	delta	HM	=	-5.32	NNO	=	-0.21	QFM	=	0.4	COH	=	2.13	IW	=	4.42
Constraint	Flags:
olivine	mass	=	13.74	(gm)	density	=	3.47	(gm/cc)	(analysis	in	mole	%)
	(Ca0.00Mg0.71Fe''0.28Mn0.01Co0.00Ni0.00)2SiO4
	G	=	-190159	(J)	H	=	-159503	(J)	S	=	28.04	(J/K)	V	=	3.96	(cc)	Cp	=	15.71	(J/K)
	tephroite	fayalite	co-olivine	ni-olivine	monticellite	forsterite
	1.22	27.6	0	0	0.27	70.92
orthopyroxene	mass	=	27.75	(gm)	density	=	3.34	(gm/cc)	(analysis	in	mole	%)
	opx	Na0.00Ca0.04Fe''0.50Mg1.41Fe'''0.01Ti0.00Al0.08Si1.95O6
	G	=	-410893	(J)	H	=	-348739	(J)	S	=	56.86	(J/K)	V	=	8.3	(cc)	Cp	=	33.12	(J/K)
	diopside	clinoenstatit	hedenbergite	alumino-buffo	buffonite	essenite	jadeite
	-49.95	95.57	49.67	3.37	-2.98	4.2	0.11
clinopyroxene	mass	=	2.06	(gm)	density	=	3.29	(gm/cc)	(analysis	in	mole	%)
	cpx	Na0.02Ca0.89Fe''0.17Mg0.79Fe'''0.04Ti0.04Al0.20Si1.85O6
	G	=	-31793.1	(J)	H	=	-27298.5	(J)	S	=	4.11	(J/K)	V	=	0.63	(cc)	Cp	=	2.35	(J/K)
	diopside	clinoenstatit	hedenbergite	alumino-buffo	buffonite	essenite	jadeite
	56.93	9	16.82	11.1	-3.22	7.24	2.12
clinopyroxene	mass	=	1.13	(gm)	density	=	3.51	(gm/cc)	(analysis	in	mole	%)
	cpx	Na0.02Ca0.96Fe''0.14Mg0.44Fe'''0.06Ti0.40Al0.79Si1.19O6
	G	=	-17087.8	(J)	H	=	-14700.6	(J)	S	=	2.18	(J/K)	V	=	0.32	(cc)	Cp	=	1.24	(J/K)
	diopside	clinoenstatit	hedenbergite	alumino-buffo	buffonite	essenite	jadeite
	0.35	2.14	14.33	75.48	4.02	1.8	1.87
feldspar	mass	=	54.65	(gm)	density	=	2.66	(gm/cc)	(analysis	in	mole	%)
	K0.01Na0.35Ca0.64Al1.64Si2.36O8
	G	=	-903632	(J)	H	=	-777504	(J)	S	=	115.38	(J/K)	V	=	20.53	(cc)	Cp	=	65.06	(J/K)
	albite	anorthite	sanidine
	35.04	63.8	1.17
spinel	mass	=	0.17	(gm)	density	=	4.8	(gm/cc)	(analysis	in	mole	%)
	Fe''1.05Mg0.19Fe'''1.36Al0.17Cr0.00Ti0.24O4
	G	=	-1285.12	(J)	H	=	-931.91	(J)	S	=	0.32	(J/K)	V	=	0.04	(cc)	Cp	=	0.16	(J/K)
	chromite	hercynite	magnetite	spinel	ulvospinel
	0	-10.18	67.77	18.56	23.86
water	mass	=	0.5	(gm)	density	=	0.02	(gm/cc)
	H2O
	G	=	-11898.4	(J)	H	=	-5904.12	(J)	S	=	5.48	(J/K)	V	=	24.81	(cc)	Cp	=	1.23	(J/K)
Total	solids	mass	=	100.01	(gm)	density	=	1.71	(gm/cc)
	G	=	-1.56675e+06	(J)	H	=	-1.33458e+06	(J)	S	=	212.38	(J/K)	V	=	58.58	(cc)	Cp	=	118.86	(J/K)
Viscosity	of	the	System	cannot	be	computed.
System	mass	=	100.01	(gm)	density	=	1.71	(gm/cc)
	G	=	-1.56675e+06	(J)	H	=	-1.33458e+06	(J)	S	=	212.38	(J/K)	V	=	58.58	(cc)	Cp	=	118.86	(J/K)
**********----------**********
Title:	Dummy	Title
T	=	810	(C)	P	=	0.1	(kbars)	log(10)	f	O2	=	-13.86	delta	HM	=	-5.32	NNO	=	-0.2	QFM	=	0.41	COH	=	2.11	IW	=	4.44
Constraint	Flags:
olivine	mass	=	13.74	(gm)	density	=	3.47	(gm/cc)	(analysis	in	mole	%)
	(Ca0.00Mg0.71Fe''0.28Mn0.01Co0.00Ni0.00)2SiO4
	G	=	-189829	(J)	H	=	-159628	(J)	S	=	27.88	(J/K)	V	=	3.95	(cc)	Cp	=	15.68	(J/K)
	tephroite	fayalite	co-olivine	ni-olivine	monticellite	forsterite
	1.22	27.54	0	0	0.25	70.98
orthopyroxene	mass	=	27.71	(gm)	density	=	3.34	(gm/cc)	(analysis	in	mole	%)
	opx	Na0.00Ca0.04Fe''0.50Mg1.41Fe'''0.01Ti0.00Al0.08Si1.95O6
	G	=	-409754	(J)	H	=	-348580	(J)	S	=	56.48	(J/K)	V	=	8.29	(cc)	Cp	=	33.03	(J/K)
	diopside	clinoenstatit	hedenbergite	alumino-buffo	buffonite	essenite	jadeite
	-50.13	95.69	49.8	3.36	-2.99	4.17	0.11
clinopyroxene	mass	=	2.09	(gm)	density	=	3.29	(gm/cc)	(analysis	in	mole	%)
	cpx	Na0.02Ca0.89Fe''0.17Mg0.79Fe'''0.04Ti0.04Al0.20Si1.85O6
	G	=	-32169	(J)	H	=	-27685.3	(J)	S	=	4.14	(J/K)	V	=	0.64	(cc)	Cp	=	2.37	(J/K)
	diopside	clinoenstatit	hedenbergite	alumino-buffo	buffonite	essenite	jadeite
	57.77	8.76	16.57	10.88	-3.32	7.21	2.13
clinopyroxene	mass	=	1.14	(gm)	density	=	3.51	(gm/cc)	(analysis	in	mole	%)
	cpx	Na0.02Ca0.96Fe''0.14Mg0.44Fe'''0.06Ti0.40Al0.80Si1.18O6
	G	=	-17192.6	(J)	H	=	-14824.5	(J)	S	=	2.19	(J/K)	V	=	0.32	(cc)	Cp	=	1.25	(J/K)
	diopside	clinoenstatit	hedenbergite	alumino-buffo	buffonite	essenite	jadeite
	0.04	2.04	14.24	76.21	3.9	1.72	1.85
feldspar	mass	=	54.65	(gm)	density	=	2.66	(gm/cc)	(analysis	in	mole	%)
	K0.01Na0.35Ca0.64Al1.64Si2.36O8
	G	=	-902502	(J)	H	=	-778172	(J)	S	=	114.79	(J/K)	V	=	20.52	(cc)	Cp	=	64.99	(J/K)
	albite	anorthite	sanidine
	35.04	63.8	1.16
spinel	mass	=	0.18	(gm)	density	=	4.81	(gm/cc)	(analysis	in	mole	%)
	Fe''1.05Mg0.18Fe'''1.38Al0.17Cr0.00Ti0.22O4
	G	=	-1339.01	(J)	H	=	-973.46	(J)	S	=	0.34	(J/K)	V	=	0.04	(cc)	Cp	=	0.17	(J/K)
	chromite	hercynite	magnetite	spinel	ulvospinel
[truncated: 22 more rows]

## Sheet: GPa 0.1
**********----------**********
T	=	1500	(C)	P	=	1	(kbars)	log(10)	f	O2	=	-5.43	delta	HM	=	-5.46	NNO	=	-0.73	QFM	=	0	COH	=	2.43	IW	=	3.23
Constraint	Flags:	fO2	path	=	QFM
Liquid	mass	=	100.1	(gm)	density	=	2.58	(gm/cc)	viscosity	=	1.03	(log	10	poise)	(analysis	in	wt	%)
	G	=	-1.74e+06	(J)	H	=	-1.20549e+06	(J)	S	=	301.45	(J/K)	V	=	38.75	(cc)	Cp	=	155.47	(J/K)
	SiO2	TiO2	Al2O3	Fe2O3	Cr2O3	FeO	MnO	MgO	NiO	CoO	CaO	Na2O	K2O	P2O5	H2O	CO2	SO3	Cl2O-1	F2O-1
	49.95	0.22	17.52	1.18	0	7.37	0.15	12.6	0	0	8.21	2.19	0.11	0	0.5	0	0	0	0
Total	solids	mass	=	0	(gm)	density	=	0	(gm/cc)
	G	=	0	(J)	H	=	0	(J)	S	=	0	(J/K)	V	=	0	(cc)	Cp	=	0	(J/K)
Viscosity	of	the	System:	1.03	(log	10	poise)
System	mass	=	100.1	(gm)	density	=	2.58	(gm/cc)
	G	=	-1.74e+06	(J)	H	=	-1.20549e+06	(J)	S	=	301.45	(J/K)	V	=	38.75	(cc)	Cp	=	155.47	(J/K)
Oxygen	delta	moles	=	-1.5439e-16	delta	grams	=	-4.94031e-15
	G	=	0	(J)	H	=	0	(J)	S	=	0	(J/K)	V	=	0	(cc)	Cp	=	0	(J/K)
**********----------**********
Title:	Dummy	Title
T	=	1490	(C)	P	=	1	(kbars)	log(10)	f	O2	=	-5.51	delta	HM	=	-5.46	NNO	=	-0.73	QFM	=	0	COH	=	2.42	IW	=	3.24
Constraint	Flags:	fO2	path	=	QFM
Liquid	mass	=	100.1	(gm)	density	=	2.59	(gm/cc)	viscosity	=	1.06	(log	10	poise)	(analysis	in	wt	%)
	G	=	-1.73699e+06	(J)	H	=	-1.20705e+06	(J)	S	=	300.57	(J/K)	V	=	38.72	(cc)	Cp	=	155.47	(J/K)
	SiO2	TiO2	Al2O3	Fe2O3	Cr2O3	FeO	MnO	MgO	NiO	CoO	CaO	Na2O	K2O	P2O5	H2O	CO2	SO3	Cl2O-1	F2O-1
	49.95	0.22	17.52	1.18	0	7.37	0.15	12.6	0	0	8.21	2.19	0.11	0	0.5	0	0	0	0
Total	solids	mass	=	0	(gm)	density	=	0	(gm/cc)
	G	=	0	(J)	H	=	0	(J)	S	=	0	(J/K)	V	=	0	(cc)	Cp	=	0	(J/K)
Viscosity	of	the	System:	1.06	(log	10	poise)
System	mass	=	100.1	(gm)	density	=	2.59	(gm/cc)
	G	=	-1.73699e+06	(J)	H	=	-1.20705e+06	(J)	S	=	300.57	(J/K)	V	=	38.72	(cc)	Cp	=	155.47	(J/K)
Oxygen	delta	moles	=	1.52394e-06	delta	grams	=	4.87642e-05
	G	=	-0.63	(J)	H	=	0.08	(J)	S	=	0	(J/K)	V	=	0.22	(cc)	Cp	=	0	(J/K)
**********----------**********
Title:	Dummy	Title
T	=	1480	(C)	P	=	1	(kbars)	log(10)	f	O2	=	-5.59	delta	HM	=	-5.47	NNO	=	-0.73	QFM	=	0	COH	=	2.42	IW	=	3.25
Constraint	Flags:	fO2	path	=	QFM
Liquid	mass	=	100.1	(gm)	density	=	2.59	(gm/cc)	viscosity	=	1.09	(log	10	poise)	(analysis	in	wt	%)
	G	=	-1.73399e+06	(J)	H	=	-1.2086e+06	(J)	S	=	299.68	(J/K)	V	=	38.69	(cc)	Cp	=	155.47	(J/K)
	SiO2	TiO2	Al2O3	Fe2O3	Cr2O3	FeO	MnO	MgO	NiO	CoO	CaO	Na2O	K2O	P2O5	H2O	CO2	SO3	Cl2O-1	F2O-1
	49.95	0.22	17.52	1.18	0	7.37	0.15	12.6	0	0	8.21	2.19	0.11	0	0.5	0	0	0	0
Total	solids	mass	=	0	(gm)	density	=	0	(gm/cc)
	G	=	0	(J)	H	=	0	(J)	S	=	0	(J/K)	V	=	0	(cc)	Cp	=	0	(J/K)
Viscosity	of	the	System:	1.09	(log	10	poise)
System	mass	=	100.1	(gm)	density	=	2.59	(gm/cc)
	G	=	-1.73399e+06	(J)	H	=	-1.2086e+06	(J)	S	=	299.68	(J/K)	V	=	38.69	(cc)	Cp	=	155.47	(J/K)
Oxygen	delta	moles	=	3.41801e-06	delta	grams	=	0.000109372
	G	=	-1.41	(J)	H	=	0.17	(J)	S	=	0	(J/K)	V	=	0.5	(cc)	Cp	=	0	(J/K)
**********----------**********
Title:	Dummy	Title
T	=	1470	(C)	P	=	1	(kbars)	log(10)	f	O2	=	-5.67	delta	HM	=	-5.47	NNO	=	-0.73	QFM	=	0	COH	=	2.41	IW	=	3.25
Constraint	Flags:	fO2	path	=	QFM
Liquid	mass	=	100.1	(gm)	density	=	2.59	(gm/cc)	viscosity	=	1.12	(log	10	poise)	(analysis	in	wt	%)
	G	=	-1.731e+06	(J)	H	=	-1.21016e+06	(J)	S	=	298.79	(J/K)	V	=	38.66	(cc)	Cp	=	155.47	(J/K)
	SiO2	TiO2	Al2O3	Fe2O3	Cr2O3	FeO	MnO	MgO	NiO	CoO	CaO	Na2O	K2O	P2O5	H2O	CO2	SO3	Cl2O-1	F2O-1
	49.95	0.22	17.52	1.18	0	7.37	0.15	12.6	0	0	8.21	2.19	0.11	0	0.5	0	0	0	0
Total	solids	mass	=	0	(gm)	density	=	0	(gm/cc)
	G	=	0	(J)	H	=	0	(J)	S	=	0	(J/K)	V	=	0	(cc)	Cp	=	0	(J/K)
Viscosity	of	the	System:	1.12	(log	10	poise)
System	mass	=	100.1	(gm)	density	=	2.59	(gm/cc)
	G	=	-1.731e+06	(J)	H	=	-1.21016e+06	(J)	S	=	298.79	(J/K)	V	=	38.66	(cc)	Cp	=	155.47	(J/K)
Oxygen	delta	moles	=	5.69107e-06	delta	grams	=	0.000182107
	G	=	-2.33	(J)	H	=	0.28	(J)	S	=	0	(J/K)	V	=	0.82	(cc)	Cp	=	0	(J/K)
**********----------**********
Title:	Dummy	Title
T	=	1460	(C)	P	=	1	(kbars)	log(10)	f	O2	=	-5.75	delta	HM	=	-5.47	NNO	=	-0.72	QFM	=	0	COH	=	2.4	IW	=	3.26
Constraint	Flags:	fO2	path	=	QFM
Liquid	mass	=	100.1	(gm)	density	=	2.59	(gm/cc)	viscosity	=	1.15	(log	10	poise)	(analysis	in	wt	%)
	G	=	-1.72802e+06	(J)	H	=	-1.21171e+06	(J)	S	=	297.9	(J/K)	V	=	38.62	(cc)	Cp	=	155.47	(J/K)
	SiO2	TiO2	Al2O3	Fe2O3	Cr2O3	FeO	MnO	MgO	NiO	CoO	CaO	Na2O	K2O	P2O5	H2O	CO2	SO3	Cl2O-1	F2O-1
	49.95	0.22	17.52	1.18	0	7.37	0.15	12.6	0	0	8.21	2.19	0.11	0	0.5	0	0	0	0
Total	solids	mass	=	0	(gm)	density	=	0	(gm/cc)
	G	=	0	(J)	H	=	0	(J)	S	=	0	(J/K)	V	=	0	(cc)	Cp	=	0	(J/K)
Viscosity	of	the	System:	1.15	(log	10	poise)
System	mass	=	100.1	(gm)	density	=	2.59	(gm/cc)
	G	=	-1.72802e+06	(J)	H	=	-1.21171e+06	(J)	S	=	297.9	(J/K)	V	=	38.62	(cc)	Cp	=	155.47	(J/K)
Oxygen	delta	moles	=	8.35234e-06	delta	grams	=	0.000267265
	G	=	-3.4	(J)	H	=	0.41	(J)	S	=	0	(J/K)	V	=	1.2	(cc)	Cp	=	0	(J/K)
**********----------**********
Title:	Dummy	Title
T	=	1450	(C)	P	=	1	(kbars)	log(10)	f	O2	=	-5.83	delta	HM	=	-5.47	NNO	=	-0.72	QFM	=	0	COH	=	2.4	IW	=	3.27
Constraint	Flags:	fO2	path	=	QFM
Liquid	mass	=	100.1	(gm)	density	=	2.59	(gm/cc)	viscosity	=	1.18	(log	10	poise)	(analysis	in	wt	%)
	G	=	-1.72505e+06	(J)	H	=	-1.21327e+06	(J)	S	=	297	(J/K)	V	=	38.59	(cc)	Cp	=	155.47	(J/K)
	SiO2	TiO2	Al2O3	Fe2O3	Cr2O3	FeO	MnO	MgO	NiO	CoO	CaO	Na2O	K2O	P2O5	H2O	CO2	SO3	Cl2O-1	F2O-1
	49.95	0.22	17.52	1.18	0	7.37	0.15	12.6	0	0	8.21	2.19	0.11	0	0.5	0	0	0	0
Total	solids	mass	=	0	(gm)	density	=	0	(gm/cc)
	G	=	0	(J)	H	=	0	(J)	S	=	0	(J/K)	V	=	0	(cc)	Cp	=	0	(J/K)
Viscosity	of	the	System:	1.18	(log	10	poise)
System	mass	=	100.1	(gm)	density	=	2.59	(gm/cc)
	G	=	-1.72505e+06	(J)	H	=	-1.21327e+06	(J)	S	=	297	(J/K)	V	=	38.59	(cc)	Cp	=	155.47	(J/K)
Oxygen	delta	moles	=	1.14114e-05	delta	grams	=	0.00036515
	G	=	-4.62	(J)	H	=	0.56	(J)	S	=	0	(J/K)	V	=	1.63	(cc)	Cp	=	0	(J/K)
**********----------**********
Title:	Dummy	Title
T	=	1440	(C)	P	=	1	(kbars)	log(10)	f	O2	=	-5.91	delta	HM	=	-5.47	NNO	=	-0.72	QFM	=	0	COH	=	2.39	IW	=	3.28
Constraint	Flags:	fO2	path	=	QFM
Liquid	mass	=	100.1	(gm)	density	=	2.6	(gm/cc)	viscosity	=	1.22	(log	10	poise)	(analysis	in	wt	%)
	G	=	-1.72208e+06	(J)	H	=	-1.21483e+06	(J)	S	=	296.1	(J/K)	V	=	38.56	(cc)	Cp	=	155.46	(J/K)
	SiO2	TiO2	Al2O3	Fe2O3	Cr2O3	FeO	MnO	MgO	NiO	CoO	CaO	Na2O	K2O	P2O5	H2O	CO2	SO3	Cl2O-1	F2O-1
	49.95	0.22	17.52	1.19	0	7.37	0.15	12.6	0	0	8.21	2.19	0.11	0	0.5	0	0	0	0
Total	solids	mass	=	0	(gm)	density	=	0	(gm/cc)
	G	=	0	(J)	H	=	0	(J)	S	=	0	(J/K)	V	=	0	(cc)	Cp	=	0	(J/K)
Viscosity	of	the	System:	1.22	(log	10	poise)
System	mass	=	100.1	(gm)	density	=	2.6	(gm/cc)
	G	=	-1.72208e+06	(J)	H	=	-1.21483e+06	(J)	S	=	296.1	(J/K)	V	=	38.56	(cc)	Cp	=	155.46	(J/K)
Oxygen	delta	moles	=	1.48781e-05	delta	grams	=	0.00047608
	G	=	-5.98	(J)	H	=	0.72	(J)	S	=	0	(J/K)	V	=	2.12	(cc)	Cp	=	0	(J/K)
**********----------**********
Title:	Dummy	Title
T	=	1430	(C)	P	=	1	(kbars)	log(10)	f	O2	=	-6	delta	HM	=	-5.47	NNO	=	-0.72	QFM	=	0	COH	=	2.38	IW	=	3.29
Constraint	Flags:	fO2	path	=	QFM
Liquid	mass	=	100.1	(gm)	density	=	2.6	(gm/cc)	viscosity	=	1.25	(log	10	poise)	(analysis	in	wt	%)
	G	=	-1.71913e+06	(J)	H	=	-1.21638e+06	(J)	S	=	295.19	(J/K)	V	=	38.53	(cc)	Cp	=	155.46	(J/K)
	SiO2	TiO2	Al2O3	Fe2O3	Cr2O3	FeO	MnO	MgO	NiO	CoO	CaO	Na2O	K2O	P2O5	H2O	CO2	SO3	Cl2O-1	F2O-1
	49.95	0.22	17.52	1.19	0	7.36	0.15	12.6	0	0	8.21	2.19	0.11	0	0.5	0	0	0	0
Total	solids	mass	=	0	(gm)	density	=	0	(gm/cc)
	G	=	0	(J)	H	=	0	(J)	S	=	0	(J/K)	V	=	0	(cc)	Cp	=	0	(J/K)
Viscosity	of	the	System:	1.25	(log	10	poise)
System	mass	=	100.1	(gm)	density	=	2.6	(gm/cc)
	G	=	-1.71913e+06	(J)	H	=	-1.21638e+06	(J)	S	=	295.19	(J/K)	V	=	38.53	(cc)	Cp	=	155.46	(J/K)
Oxygen	delta	moles	=	1.87627e-05	delta	grams	=	0.000600385
	G	=	-7.49	(J)	H	=	0.9	(J)	S	=	0	(J/K)	V	=	2.66	(cc)	Cp	=	0	(J/K)
**********----------**********
Title:	Dummy	Title
T	=	1420	(C)	P	=	1	(kbars)	log(10)	f	O2	=	-6.08	delta	HM	=	-5.48	NNO	=	-0.72	QFM	=	0	COH	=	2.37	IW	=	3.3
Constraint	Flags:	fO2	path	=	QFM
Liquid	mass	=	100.1	(gm)	density	=	2.6	(gm/cc)	viscosity	=	1.28	(log	10	poise)	(analysis	in	wt	%)
	G	=	-1.71618e+06	(J)	H	=	-1.21794e+06	(J)	S	=	294.27	(J/K)	V	=	38.5	(cc)	Cp	=	155.46	(J/K)
	SiO2	TiO2	Al2O3	Fe2O3	Cr2O3	FeO	MnO	MgO	NiO	CoO	CaO	Na2O	K2O	P2O5	H2O	CO2	SO3	Cl2O-1	F2O-1
	49.95	0.22	17.52	1.19	0	7.36	0.15	12.6	0	0	8.21	2.19	0.11	0	0.5	0	0	0	0
Total	solids	mass	=	0	(gm)	density	=	0	(gm/cc)
	G	=	0	(J)	H	=	0	(J)	S	=	0	(J/K)	V	=	0	(cc)	Cp	=	0	(J/K)
Viscosity	of	the	System:	1.28	(log	10	poise)
System	mass	=	100.1	(gm)	density	=	2.6	(gm/cc)
	G	=	-1.71618e+06	(J)	H	=	-1.21794e+06	(J)	S	=	294.27	(J/K)	V	=	38.5	(cc)	Cp	=	155.46	(J/K)
Oxygen	delta	moles	=	2.3076e-05	delta	grams	=	0.000738406
	G	=	-9.16	(J)	H	=	1.1	(J)	S	=	0.01	(J/K)	V	=	3.25	(cc)	Cp	=	0	(J/K)
**********----------**********
Title:	Dummy	Title
T	=	1410	(C)	P	=	1	(kbars)	log(10)	f	O2	=	-6.17	delta	HM	=	-5.48	NNO	=	-0.71	QFM	=	0	COH	=	2.37	IW	=	3.31
Constraint	Flags:	fO2	path	=	QFM
Liquid	mass	=	100.1	(gm)	density	=	2.6	(gm/cc)	viscosity	=	1.31	(log	10	poise)	(analysis	in	wt	%)
	G	=	-1.71325e+06	(J)	H	=	-1219496	(J)	S	=	293.35	(J/K)	V	=	38.47	(cc)	Cp	=	155.46	(J/K)
	SiO2	TiO2	Al2O3	Fe2O3	Cr2O3	FeO	MnO	MgO	NiO	CoO	CaO	Na2O	K2O	P2O5	H2O	CO2	SO3	Cl2O-1	F2O-1
	49.95	0.22	17.52	1.19	0	7.36	0.15	12.6	0	0	8.21	2.19	0.11	0	0.5	0	0	0	0
Total	solids	mass	=	0	(gm)	density	=	0	(gm/cc)
	G	=	0	(J)	H	=	0	(J)	S	=	0	(J/K)	V	=	0	(cc)	Cp	=	0	(J/K)
Viscosity	of	the	System:	1.31	(log	10	poise)
System	mass	=	100.1	(gm)	density	=	2.6	(gm/cc)
	G	=	-1.71325e+06	(J)	H	=	-1219496	(J)	S	=	293.35	(J/K)	V	=	38.47	(cc)	Cp	=	155.46	(J/K)
Oxygen	delta	moles	=	2.78291e-05	delta	grams	=	0.000890499
	G	=	-10.97	(J)	H	=	1.32	(J)	S	=	0.01	(J/K)	V	=	3.89	(cc)	Cp	=	0	(J/K)
**********----------**********
Title:	Dummy	Title
T	=	1400	(C)	P	=	1	(kbars)	log(10)	f	O2	=	-6.25	delta	HM	=	-5.48	NNO	=	-0.71	QFM	=	0	COH	=	2.36	IW	=	3.31
Constraint	Flags:	fO2	path	=	QFM
Liquid	mass	=	100.1	(gm)	density	=	2.6	(gm/cc)	viscosity	=	1.34	(log	10	poise)	(analysis	in	wt	%)
	G	=	-1.71032e+06	(J)	H	=	-1.22105e+06	(J)	S	=	292.42	(J/K)	V	=	38.44	(cc)	Cp	=	155.46	(J/K)
	SiO2	TiO2	Al2O3	Fe2O3	Cr2O3	FeO	MnO	MgO	NiO	CoO	CaO	Na2O	K2O	P2O5	H2O	CO2	SO3	Cl2O-1	F2O-1
	49.95	0.22	17.52	1.19	0	7.36	0.15	12.6	0	0	8.21	2.19	0.11	0	0.5	0	0	0	0
Total	solids	mass	=	0	(gm)	density	=	0	(gm/cc)
	G	=	0	(J)	H	=	0	(J)	S	=	0	(J/K)	V	=	0	(cc)	Cp	=	0	(J/K)
Viscosity	of	the	System:	1.34	(log	10	poise)
System	mass	=	100.1	(gm)	density	=	2.6	(gm/cc)
	G	=	-1.71032e+06	(J)	H	=	-1.22105e+06	(J)	S	=	292.42	(J/K)	V	=	38.44	(cc)	Cp	=	155.46	(J/K)
Oxygen	delta	moles	=	3.30335e-05	delta	grams	=	0.00105703
	G	=	-12.93	(J)	H	=	1.55	(J)	S	=	0.01	(J/K)	V	=	4.6	(cc)	Cp	=	0	(J/K)
**********----------**********
Title:	Dummy	Title
T	=	1390	(C)	P	=	1	(kbars)	log(10)	f	O2	=	-6.34	delta	HM	=	-5.48	NNO	=	-0.71	QFM	=	0	COH	=	2.35	IW	=	3.32
Constraint	Flags:	fO2	path	=	QFM
Liquid	mass	=	100.1	(gm)	density	=	2.61	(gm/cc)	viscosity	=	1.38	(log	10	poise)	(analysis	in	wt	%)
	G	=	-1.70741e+06	(J)	H	=	-1.22261e+06	(J)	S	=	291.49	(J/K)	V	=	38.41	(cc)	Cp	=	155.46	(J/K)
	SiO2	TiO2	Al2O3	Fe2O3	Cr2O3	FeO	MnO	MgO	NiO	CoO	CaO	Na2O	K2O	P2O5	H2O	CO2	SO3	Cl2O-1	F2O-1
	49.95	0.22	17.52	1.19	0	7.36	0.15	12.6	0	0	8.21	2.19	0.11	0	0.5	0	0	0	0
Total	solids	mass	=	0	(gm)	density	=	0	(gm/cc)
	G	=	0	(J)	H	=	0	(J)	S	=	0	(J/K)	V	=	0	(cc)	Cp	=	0	(J/K)
Viscosity	of	the	System:	1.38	(log	10	poise)
System	mass	=	100.1	(gm)	density	=	2.61	(gm/cc)
	G	=	-1.70741e+06	(J)	H	=	-1.22261e+06	(J)	S	=	291.49	(J/K)	V	=	38.41	(cc)	Cp	=	155.46	(J/K)
Oxygen	delta	moles	=	3.87012e-05	delta	grams	=	0.00123839
	G	=	-15.05	(J)	H	=	1.8	(J)	S	=	0.01	(J/K)	V	=	5.35	(cc)	Cp	=	0	(J/K)
**********----------**********
Title:	Dummy	Title
T	=	1380	(C)	P	=	1	(kbars)	log(10)	f	O2	=	-6.43	delta	HM	=	-5.48	NNO	=	-0.71	QFM	=	0	COH	=	2.34	IW	=	3.33
Constraint	Flags:	fO2	path	=	QFM
Liquid	mass	=	100.1	(gm)	density	=	2.61	(gm/cc)	viscosity	=	1.41	(log	10	poise)	(analysis	in	wt	%)
	G	=	-1.7045e+06	(J)	H	=	-1.22417e+06	(J)	S	=	290.56	(J/K)	V	=	38.38	(cc)	Cp	=	155.46	(J/K)
	SiO2	TiO2	Al2O3	Fe2O3	Cr2O3	FeO	MnO	MgO	NiO	CoO	CaO	Na2O	K2O	P2O5	H2O	CO2	SO3	Cl2O-1	F2O-1
	49.95	0.22	17.52	1.19	0	7.36	0.15	12.6	0	0	8.21	2.19	0.11	0	0.5	0	0	0	0
Total	solids	mass	=	0	(gm)	density	=	0	(gm/cc)
	G	=	0	(J)	H	=	0	(J)	S	=	0	(J/K)	V	=	0	(cc)	Cp	=	0	(J/K)
Viscosity	of	the	System:	1.41	(log	10	poise)
System	mass	=	100.1	(gm)	density	=	2.61	(gm/cc)
	G	=	-1.7045e+06	(J)	H	=	-1.22417e+06	(J)	S	=	290.56	(J/K)	V	=	38.38	(cc)	Cp	=	155.46	(J/K)
Oxygen	delta	moles	=	4.48447e-05	delta	grams	=	0.00143498
	G	=	-17.32	(J)	H	=	2.07	(J)	S	=	0.01	(J/K)	V	=	6.16	(cc)	Cp	=	0	(J/K)
**********----------**********
Title:	Dummy	Title
T	=	1370	(C)	P	=	1	(kbars)	log(10)	f	O2	=	-6.52	delta	HM	=	-5.48	NNO	=	-0.71	QFM	=	0	COH	=	2.33	IW	=	3.34
Constraint	Flags:	fO2	path	=	QFM
Liquid	mass	=	100.1	(gm)	density	=	2.61	(gm/cc)	viscosity	=	1.44	(log	10	poise)	(analysis	in	wt	%)
	G	=	-1.7016e+06	(J)	H	=	-1.22572e+06	(J)	S	=	289.61	(J/K)	V	=	38.35	(cc)	Cp	=	155.46	(J/K)
	SiO2	TiO2	Al2O3	Fe2O3	Cr2O3	FeO	MnO	MgO	NiO	CoO	CaO	Na2O	K2O	P2O5	H2O	CO2	SO3	Cl2O-1	F2O-1
	49.95	0.22	17.52	1.2	0	7.35	0.15	12.6	0	0	8.21	2.19	0.11	0	0.5	0	0	0	0
Total	solids	mass	=	0	(gm)	density	=	0	(gm/cc)
	G	=	0	(J)	H	=	0	(J)	S	=	0	(J/K)	V	=	0	(cc)	Cp	=	0	(J/K)
Viscosity	of	the	System:	1.44	(log	10	poise)
System	mass	=	100.1	(gm)	density	=	2.61	(gm/cc)
	G	=	-1.7016e+06	(J)	H	=	-1.22572e+06	(J)	S	=	289.61	(J/K)	V	=	38.35	(cc)	Cp	=	155.46	(J/K)
Oxygen	delta	moles	=	5.1477e-05	delta	grams	=	0.0016472
	G	=	-19.75	(J)	H	=	2.36	(J)	S	=	0.01	(J/K)	V	=	7.03	(cc)	Cp	=	0	(J/K)
**********----------**********
Title:	Dummy	Title
T	=	1360	(C)	P	=	1	(kbars)	log(10)	f	O2	=	-6.61	delta	HM	=	-5.49	NNO	=	-0.7	QFM	=	0	COH	=	2.33	IW	=	3.35
Constraint	Flags:	fO2	path	=	QFM
Liquid	mass	=	100.1	(gm)	density	=	2.61	(gm/cc)	viscosity	=	1.48	(log	10	poise)	(analysis	in	wt	%)
	G	=	-1.69872e+06	(J)	H	=	-1.22728e+06	(J)	S	=	288.66	(J/K)	V	=	38.32	(cc)	Cp	=	155.46	(J/K)
	SiO2	TiO2	Al2O3	Fe2O3	Cr2O3	FeO	MnO	MgO	NiO	CoO	CaO	Na2O	K2O	P2O5	H2O	CO2	SO3	Cl2O-1	F2O-1
	49.95	0.22	17.52	1.2	0	7.35	0.15	12.6	0	0	8.21	2.19	0.11	0	0.5	0	0	0	0
Total	solids	mass	=	0	(gm)	density	=	0	(gm/cc)
	G	=	0	(J)	H	=	0	(J)	S	=	0	(J/K)	V	=	0	(cc)	Cp	=	0	(J/K)
Viscosity	of	the	System:	1.48	(log	10	poise)
System	mass	=	100.1	(gm)	density	=	2.61	(gm/cc)
	G	=	-1.69872e+06	(J)	H	=	-1.22728e+06	(J)	S	=	288.66	(J/K)	V	=	38.32	(cc)	Cp	=	155.46	(J/K)
Oxygen	delta	moles	=	5.86115e-05	delta	grams	=	0.0018755
	G	=	-22.33	(J)	H	=	2.67	(J)	S	=	0.02	(J/K)	V	=	7.96	(cc)	Cp	=	0	(J/K)
**********----------**********
Title:	Dummy	Title
T	=	1350	(C)	P	=	1	(kbars)	log(10)	f	O2	=	-6.7	delta	HM	=	-5.49	NNO	=	-0.7	QFM	=	0	COH	=	2.32	IW	=	3.36
Constraint	Flags:	fO2	path	=	QFM
Liquid	mass	=	100.1	(gm)	density	=	2.61	(gm/cc)	viscosity	=	1.51	(log	10	poise)	(analysis	in	wt	%)
	G	=	-1.69584e+06	(J)	H	=	-1.22884e+06	(J)	S	=	287.71	(J/K)	V	=	38.29	(cc)	Cp	=	155.45	(J/K)
	SiO2	TiO2	Al2O3	Fe2O3	Cr2O3	FeO	MnO	MgO	NiO	CoO	CaO	Na2O	K2O	P2O5	H2O	CO2	SO3	Cl2O-1	F2O-1
	49.95	0.22	17.52	1.2	0	7.35	0.15	12.6	0	0	8.21	2.19	0.11	0	0.5	0	0	0	0
Total	solids	mass	=	0	(gm)	density	=	0	(gm/cc)
	G	=	0	(J)	H	=	0	(J)	S	=	0	(J/K)	V	=	0	(cc)	Cp	=	0	(J/K)
Viscosity	of	the	System:	1.51	(log	10	poise)
System	mass	=	100.1	(gm)	density	=	2.61	(gm/cc)
	G	=	-1.69584e+06	(J)	H	=	-1.22884e+06	(J)	S	=	287.71	(J/K)	V	=	38.29	(cc)	Cp	=	155.45	(J/K)
Oxygen	delta	moles	=	6.62624e-05	delta	grams	=	0.00212032
	G	=	-25.08	(J)	H	=	2.99	(J)	S	=	0.02	(J/K)	V	=	8.94	(cc)	Cp	=	0	(J/K)
**********----------**********
Title:	Dummy	Title
T	=	1340	(C)	P	=	1	(kbars)	log(10)	f	O2	=	-6.79	delta	HM	=	-5.49	NNO	=	-0.7	QFM	=	0	COH	=	2.31	IW	=	3.37
Constraint	Flags:	fO2	path	=	QFM
Liquid	mass	=	100.1	(gm)	density	=	2.62	(gm/cc)	viscosity	=	1.55	(log	10	poise)	(analysis	in	wt	%)
	G	=	-1.69297e+06	(J)	H	=	-1.2304e+06	(J)	S	=	286.75	(J/K)	V	=	38.26	(cc)	Cp	=	155.45	(J/K)
	SiO2	TiO2	Al2O3	Fe2O3	Cr2O3	FeO	MnO	MgO	NiO	CoO	CaO	Na2O	K2O	P2O5	H2O	CO2	SO3	Cl2O-1	F2O-1
	49.95	0.22	17.52	1.2	0	7.35	0.15	12.6	0	0	8.21	2.19	0.11	0	0.5	0	0	0	0
Total	solids	mass	=	0	(gm)	density	=	0	(gm/cc)
	G	=	0	(J)	H	=	0	(J)	S	=	0	(J/K)	V	=	0	(cc)	Cp	=	0	(J/K)
Viscosity	of	the	System:	1.55	(log	10	poise)
System	mass	=	100.1	(gm)	density	=	2.62	(gm/cc)
	G	=	-1.69297e+06	(J)	H	=	-1.2304e+06	(J)	S	=	286.75	(J/K)	V	=	38.26	(cc)	Cp	=	155.45	(J/K)
Oxygen	delta	moles	=	7.44442e-05	delta	grams	=	0.00238213
	G	=	-27.98	(J)	H	=	3.33	(J)	S	=	0.02	(J/K)	V	=	9.98	(cc)	Cp	=	0	(J/K)
**********----------**********
Title:	Dummy	Title
T	=	1330	(C)	P	=	1	(kbars)	log(10)	f	O2	=	-6.89	delta	HM	=	-5.49	NNO	=	-0.7	QFM	=	0	COH	=	2.3	IW	=	3.38
Constraint	Flags:	fO2	path	=	QFM
Liquid	mass	=	100.1	(gm)	density	=	2.62	(gm/cc)	viscosity	=	1.58	(log	10	poise)	(analysis	in	wt	%)
	G	=	-1.69011e+06	(J)	H	=	-1.23196e+06	(J)	S	=	285.78	(J/K)	V	=	38.23	(cc)	Cp	=	155.45	(J/K)
	SiO2	TiO2	Al2O3	Fe2O3	Cr2O3	FeO	MnO	MgO	NiO	CoO	CaO	Na2O	K2O	P2O5	H2O	CO2	SO3	Cl2O-1	F2O-1
	49.95	0.22	17.52	1.21	0	7.35	0.15	12.6	0	0	8.21	2.19	0.11	0	0.5	0	0	0	0
Total	solids	mass	=	0	(gm)	density	=	0	(gm/cc)
	G	=	0	(J)	H	=	0	(J)	S	=	0	(J/K)	V	=	0	(cc)	Cp	=	0	(J/K)
Viscosity	of	the	System:	1.58	(log	10	poise)
System	mass	=	100.1	(gm)	density	=	2.62	(gm/cc)
	G	=	-1.69011e+06	(J)	H	=	-1.23196e+06	(J)	S	=	285.78	(J/K)	V	=	38.23	(cc)	Cp	=	155.45	(J/K)
Oxygen	delta	moles	=	8.31723e-05	delta	grams	=	0.00266141
	G	=	-31.04	(J)	H	=	3.69	(J)	S	=	0.02	(J/K)	V	=	11.09	(cc)	Cp	=	0	(J/K)
**********----------**********
Title:	Dummy	Title
T	=	1320	(C)	P	=	1	(kbars)	log(10)	f	O2	=	-6.98	delta	HM	=	-5.49	NNO	=	-0.69	QFM	=	0	COH	=	2.29	IW	=	3.39
Constraint	Flags:	fO2	path	=	QFM
Liquid	mass	=	99.16	(gm)	density	=	2.62	(gm/cc)	viscosity	=	1.65	(log	10	poise)	(analysis	in	wt	%)
	G	=	-1.67153e+06	(J)	H	=	-1.22206e+06	(J)	S	=	282.13	(J/K)	V	=	37.88	(cc)	Cp	=	153.75	(J/K)
	SiO2	TiO2	Al2O3	Fe2O3	Cr2O3	FeO	MnO	MgO	NiO	CoO	CaO	Na2O	K2O	P2O5	H2O	CO2	SO3	Cl2O-1	F2O-1
	50.04	0.22	17.69	1.21	0	7.33	0.15	12.26	0	0	8.29	2.21	0.11	0	0.5	0	0	0	0
olivine	mass	=	0.94	(gm)	density	=	3.19	(gm/cc)	(analysis	in	mole	%)
	(Ca0.00Mg0.89Fe''0.10Mn0.00Co0.00Ni0.00)2SiO4
	G	=	-15717.6	(J)	H	=	-11917.9	(J)	S	=	2.39	(J/K)	V	=	0.29	(cc)	Cp	=	1.2	(J/K)
	tephroite	fayalite	co-olivine	ni-olivine	monticellite	forsterite
	0.18	10.44	0	0	0.71	88.67
Total	solids	mass	=	0.94	(gm)	density	=	3.19	(gm/cc)
	G	=	-15717.6	(J)	H	=	-11917.9	(J)	S	=	2.39	(J/K)	V	=	0.29	(cc)	Cp	=	1.2	(J/K)
Viscosity	of	the	System:	1.66	(log	10	poise)
System	mass	=	100.1	(gm)	density	=	2.62	(gm/cc)
	G	=	-1.68724e+06	(J)	H	=	-1.23398e+06	(J)	S	=	284.51	(J/K)	V	=	38.18	(cc)	Cp	=	154.95	(J/K)
Oxygen	delta	moles	=	5.60992e-05	delta	grams	=	0.00179511
	G	=	-20.79	(J)	H	=	2.47	(J)	S	=	0.01	(J/K)	V	=	7.43	(cc)	Cp	=	0	(J/K)
**********----------**********
Title:	Dummy	Title
T	=	1310	(C)	P	=	1	(kbars)	log(10)	f	O2	=	-7.08	delta	HM	=	-5.5	NNO	=	-0.69	QFM	=	0	COH	=	2.28	IW	=	3.4
Constraint	Flags:	fO2	path	=	QFM
Liquid	mass	=	97.97	(gm)	density	=	2.62	(gm/cc)	viscosity	=	1.72	(log	10	poise)	(analysis	in	wt	%)
	G	=	-1.64875e+06	(J)	H	=	-1.20904e+06	(J)	S	=	277.74	(J/K)	V	=	37.45	(cc)	Cp	=	151.58	(J/K)
	SiO2	TiO2	Al2O3	Fe2O3	Cr2O3	FeO	MnO	MgO	NiO	CoO	CaO	Na2O	K2O	P2O5	H2O	CO2	SO3	Cl2O-1	F2O-1
	50.15	0.22	17.9	1.21	0	7.3	0.15	11.82	0	0	8.38	2.24	0.11	0	0.51	0	0	0	0
olivine	mass	=	2.13	(gm)	density	=	3.19	(gm/cc)	(analysis	in	mole	%)
	(Ca0.00Mg0.89Fe''0.11Mn0.00Co0.00Ni0.00)2SiO4
	G	=	-35633.6	(J)	H	=	-27072.7	(J)	S	=	5.41	(J/K)	V	=	0.67	(cc)	Cp	=	2.74	(J/K)
	tephroite	fayalite	co-olivine	ni-olivine	monticellite	forsterite
	0.18	10.77	0	0	0.73	88.33
Total	solids	mass	=	2.13	(gm)	density	=	3.19	(gm/cc)
	G	=	-35633.6	(J)	H	=	-27072.7	(J)	S	=	5.41	(J/K)	V	=	0.67	(cc)	Cp	=	2.74	(J/K)
Viscosity	of	the	System:	1.75	(log	10	poise)
System	mass	=	100.1	(gm)	density	=	2.63	(gm/cc)
	G	=	-1.68438e+06	(J)	H	=	-1.23611e+06	(J)	S	=	283.15	(J/K)	V	=	38.12	(cc)	Cp	=	154.31	(J/K)
Oxygen	delta	moles	=	1.68058e-05	delta	grams	=	0.000537767
	G	=	-6.18	(J)	H	=	0.73	(J)	S	=	0	(J/K)	V	=	2.21	(cc)	Cp	=	0	(J/K)
**********----------**********
Title:	Dummy	Title
T	=	1300	(C)	P	=	1	(kbars)	log(10)	f	O2	=	-7.18	delta	HM	=	-5.5	NNO	=	-0.69	QFM	=	0	COH	=	2.27	IW	=	3.41
Constraint	Flags:	fO2	path	=	QFM
Liquid	mass	=	96.81	(gm)	density	=	2.61	(gm/cc)	viscosity	=	1.8	(log	10	poise)	(analysis	in	wt	%)
	G	=	-1.62681e+06	(J)	H	=	-1.19655e+06	(J)	S	=	273.5	(J/K)	V	=	37.03	(cc)	Cp	=	149.49	(J/K)
	SiO2	TiO2	Al2O3	Fe2O3	Cr2O3	FeO	MnO	MgO	NiO	CoO	CaO	Na2O	K2O	P2O5	H2O	CO2	SO3	Cl2O-1	F2O-1
	50.27	0.23	18.12	1.21	0	7.26	0.15	11.39	0	0	8.48	2.26	0.11	0	0.52	0	0	0	0
olivine	mass	=	3.29	(gm)	density	=	3.2	(gm/cc)	(analysis	in	mole	%)
	(Ca0.00Mg0.89Fe''0.11Mn0.00Co0.00Ni0.00)2SiO4
	G	=	-54728.1	(J)	H	=	-41661.7	(J)	S	=	8.31	(J/K)	V	=	1.03	(cc)	Cp	=	4.21	(J/K)
	tephroite	fayalite	co-olivine	ni-olivine	monticellite	forsterite
	0.19	11.1	0	0	0.74	87.98
Total	solids	mass	=	3.29	(gm)	density	=	3.2	(gm/cc)
	G	=	-54728.1	(J)	H	=	-41661.7	(J)	S	=	8.31	(J/K)	V	=	1.03	(cc)	Cp	=	4.21	(J/K)
Viscosity	of	the	System:	1.84	(log	10	poise)
System	mass	=	100.1	(gm)	density	=	2.63	(gm/cc)
	G	=	-1.68154e+06	(J)	H	=	-1.23821e+06	(J)	S	=	281.81	(J/K)	V	=	38.06	(cc)	Cp	=	153.69	(J/K)
Oxygen	delta	moles	=	-2.34761e-05	delta	grams	=	-0.000751207
	G	=	8.58	(J)	H	=	-1.02	(J)	S	=	-0.01	(J/K)	V	=	-3.07	(cc)	Cp	=	0	(J/K)
**********----------**********
Title:	Dummy	Title
T	=	1290	(C)	P	=	1	(kbars)	log(10)	f	O2	=	-7.28	delta	HM	=	-5.5	NNO	=	-0.69	QFM	=	0	COH	=	2.27	IW	=	3.42
Constraint	Flags:	fO2	path	=	QFM
Liquid	mass	=	95.69	(gm)	density	=	2.61	(gm/cc)	viscosity	=	1.87	(log	10	poise)	(analysis	in	wt	%)
	G	=	-1.60566e+06	(J)	H	=	-1.18456e+06	(J)	S	=	269.39	(J/K)	V	=	36.63	(cc)	Cp	=	147.47	(J/K)
	SiO2	TiO2	Al2O3	Fe2O3	Cr2O3	FeO	MnO	MgO	NiO	CoO	CaO	Na2O	K2O	P2O5	H2O	CO2	SO3	Cl2O-1	F2O-1
	50.38	0.23	18.33	1.21	0	7.22	0.15	10.97	0	0	8.58	2.29	0.11	0	0.52	0	0	0	0
olivine	mass	=	4.4	(gm)	density	=	3.2	(gm/cc)	(analysis	in	mole	%)
	(Ca0.00Mg0.88Fe''0.11Mn0.00Co0.00Ni0.00)2SiO4
	G	=	-73041.9	(J)	H	=	-55712.3	(J)	S	=	11.09	(J/K)	V	=	1.38	(cc)	Cp	=	5.63	(J/K)
	tephroite	fayalite	co-olivine	ni-olivine	monticellite	forsterite
	0.19	11.43	0	0	0.76	87.62
Total	solids	mass	=	4.4	(gm)	density	=	3.2	(gm/cc)
	G	=	-73041.9	(J)	H	=	-55712.3	(J)	S	=	11.09	(J/K)	V	=	1.38	(cc)	Cp	=	5.63	(J/K)
Viscosity	of	the	System:	1.94	(log	10	poise)
System	mass	=	100.1	(gm)	density	=	2.63	(gm/cc)
	G	=	-1.6787e+06	(J)	H	=	-1.24027e+06	(J)	S	=	280.48	(J/K)	V	=	38	(cc)	Cp	=	153.1	(J/K)
Oxygen	delta	moles	=	-6.48097e-05	delta	grams	=	-0.00207383
	G	=	23.51	(J)	H	=	-2.78	(J)	S	=	-0.02	(J/K)	V	=	-8.42	(cc)	Cp	=	0	(J/K)
**********----------**********
Title:	Dummy	Title
T	=	1280	(C)	P	=	1	(kbars)	log(10)	f	O2	=	-7.38	delta	HM	=	-5.5	NNO	=	-0.68	QFM	=	0	COH	=	2.26	IW	=	3.43
Constraint	Flags:	fO2	path	=	QFM
Liquid	mass	=	94.61	(gm)	density	=	2.61	(gm/cc)	viscosity	=	1.95	(log	10	poise)	(analysis	in	wt	%)
	G	=	-1.58526e+06	(J)	H	=	-1.17306e+06	(J)	S	=	265.4	(J/K)	V	=	36.24	(cc)	Cp	=	145.53	(J/K)
	SiO2	TiO2	Al2O3	Fe2O3	Cr2O3	FeO	MnO	MgO	NiO	CoO	CaO	Na2O	K2O	P2O5	H2O	CO2	SO3	Cl2O-1	F2O-1
	50.5	0.23	18.54	1.21	0	7.17	0.15	10.57	0	0	8.67	2.31	0.12	0	0.53	0	0	0	0
olivine	mass	=	5.48	(gm)	density	=	3.21	(gm/cc)	(analysis	in	mole	%)
	(Ca0.00Mg0.88Fe''0.12Mn0.00Co0.00Ni0.00)2SiO4
	G	=	-90613.7	(J)	H	=	-69250.2	(J)	S	=	13.75	(J/K)	V	=	1.71	(cc)	Cp	=	6.99	(J/K)
	tephroite	fayalite	co-olivine	ni-olivine	monticellite	forsterite
	0.2	11.78	0	0	0.77	87.25
Total	solids	mass	=	5.48	(gm)	density	=	3.21	(gm/cc)
	G	=	-90613.7	(J)	H	=	-69250.2	(J)	S	=	13.75	(J/K)	V	=	1.71	(cc)	Cp	=	6.99	(J/K)
Viscosity	of	the	System:	2.03	(log	10	poise)
System	mass	=	100.09	(gm)	density	=	2.64	(gm/cc)
	G	=	-1.67588e+06	(J)	H	=	-1.24231e+06	(J)	S	=	279.15	(J/K)	V	=	37.95	(cc)	Cp	=	152.52	(J/K)
Oxygen	delta	moles	=	-0.000107259	delta	grams	=	-0.00343217
	G	=	38.64	(J)	H	=	-4.56	(J)	S	=	-0.03	(J/K)	V	=	-13.85	(cc)	Cp	=	0	(J/K)
**********----------**********
Title:	Dummy	Title
T	=	1270	(C)	P	=	1	(kbars)	log(10)	f	O2	=	-7.48	delta	HM	=	-5.5	NNO	=	-0.68	QFM	=	0	COH	=	2.25	IW	=	3.44
Constraint	Flags:	fO2	path	=	QFM
Liquid	mass	=	93.56	(gm)	density	=	2.61	(gm/cc)	viscosity	=	2.03	(log	10	poise)	(analysis	in	wt	%)
	G	=	-1.56559e+06	(J)	H	=	-1.16201e+06	(J)	S	=	261.53	(J/K)	V	=	35.86	(cc)	Cp	=	143.66	(J/K)
	SiO2	TiO2	Al2O3	Fe2O3	Cr2O3	FeO	MnO	MgO	NiO	CoO	CaO	Na2O	K2O	P2O5	H2O	CO2	SO3	Cl2O-1	F2O-1
	50.62	0.24	18.75	1.21	0	7.11	0.15	10.17	0	0	8.76	2.34	0.12	0	0.53	0	0	0	0
olivine	mass	=	6.53	(gm)	density	=	3.21	(gm/cc)	(analysis	in	mole	%)
	(Ca0.00Mg0.88Fe''0.12Mn0.00Co0.00Ni0.00)2SiO4
	G	=	-107479	(J)	H	=	-82299.5	(J)	S	=	16.32	(J/K)	V	=	2.03	(cc)	Cp	=	8.31	(J/K)
	tephroite	fayalite	co-olivine	ni-olivine	monticellite	forsterite
	0.2	12.13	0	0	0.79	86.88
Total	solids	mass	=	6.53	(gm)	density	=	3.21	(gm/cc)
	G	=	-107479	(J)	H	=	-82299.5	(J)	S	=	16.32	(J/K)	V	=	2.03	(cc)	Cp	=	8.31	(J/K)
Viscosity	of	the	System:	2.13	(log	10	poise)
System	mass	=	100.09	(gm)	density	=	2.64	(gm/cc)
	G	=	-1.67307e+06	(J)	H	=	-1.24431e+06	(J)	S	=	277.84	(J/K)	V	=	37.89	(cc)	Cp	=	151.97	(J/K)
Oxygen	delta	moles	=	-0.000150891	delta	grams	=	-0.00482834
	G	=	53.96	(J)	H	=	-6.36	(J)	S	=	-0.04	(J/K)	V	=	-19.36	(cc)	Cp	=	-0.01	(J/K)
**********----------**********
Title:	Dummy	Title
T	=	1260	(C)	P	=	1	(kbars)	log(10)	f	O2	=	-7.58	delta	HM	=	-5.51	NNO	=	-0.68	QFM	=	0	COH	=	2.24	IW	=	3.45
Constraint	Flags:	fO2	path	=	QFM
Liquid	mass	=	92.55	(gm)	density	=	2.61	(gm/cc)	viscosity	=	2.11	(log	10	poise)	(analysis	in	wt	%)
	G	=	-1546596	(J)	H	=	-1.15141e+06	(J)	S	=	257.76	(J/K)	V	=	35.5	(cc)	Cp	=	141.86	(J/K)
	SiO2	TiO2	Al2O3	Fe2O3	Cr2O3	FeO	MnO	MgO	NiO	CoO	CaO	Na2O	K2O	P2O5	H2O	CO2	SO3	Cl2O-1	F2O-1
	50.73	0.24	18.95	1.21	0	7.05	0.15	9.79	0	0	8.86	2.37	0.12	0	0.54	0	0	0	0
olivine	mass	=	7.54	(gm)	density	=	3.22	(gm/cc)	(analysis	in	mole	%)
	(Ca0.00Mg0.87Fe''0.12Mn0.00Co0.00Ni0.00)2SiO4
	G	=	-123673	(J)	H	=	-94883	(J)	S	=	18.78	(J/K)	V	=	2.34	(cc)	Cp	=	9.57	(J/K)
	tephroite	fayalite	co-olivine	ni-olivine	monticellite	forsterite
	0.2	12.49	0	0	0.8	86.5
Total	solids	mass	=	7.54	(gm)	density	=	3.22	(gm/cc)
	G	=	-123673	(J)	H	=	-94883	(J)	S	=	18.78	(J/K)	V	=	2.34	(cc)	Cp	=	9.57	(J/K)
Viscosity	of	the	System:	2.22	(log	10	poise)
System	mass	=	100.09	(gm)	density	=	2.65	(gm/cc)
	G	=	-1.67027e+06	(J)	H	=	-1.24629e+06	(J)	S	=	276.54	(J/K)	V	=	37.84	(cc)	Cp	=	151.43	(J/K)
Oxygen	delta	moles	=	-0.000195772	delta	grams	=	-0.00626446
	G	=	69.51	(J)	H	=	-8.18	(J)	S	=	-0.05	(J/K)	V	=	-24.96	(cc)	Cp	=	-0.01	(J/K)
**********----------**********
Title:	Dummy	Title
T	=	1250	(C)	P	=	1	(kbars)	log(10)	f	O2	=	-7.68	delta	HM	=	-5.51	NNO	=	-0.68	QFM	=	0	COH	=	2.23	IW	=	3.46
Constraint	Flags:	fO2	path	=	QFM
Liquid	mass	=	91.57	(gm)	density	=	2.61	(gm/cc)	viscosity	=	2.19	(log	10	poise)	(analysis	in	wt	%)
	G	=	-1.52826e+06	(J)	H	=	-1.14122e+06	(J)	S	=	254.1	(J/K)	V	=	35.15	(cc)	Cp	=	140.12	(J/K)
	SiO2	TiO2	Al2O3	Fe2O3	Cr2O3	FeO	MnO	MgO	NiO	CoO	CaO	Na2O	K2O	P2O5	H2O	CO2	SO3	Cl2O-1	F2O-1
	50.85	0.24	19.16	1.21	0	6.98	0.15	9.41	0	0	8.95	2.39	0.12	0	0.55	0	0	0	0
olivine	mass	=	8.52	(gm)	density	=	3.22	(gm/cc)	(analysis	in	mole	%)
	(Ca0.00Mg0.87Fe''0.13Mn0.00Co0.00Ni0.00)2SiO4
	G	=	-139225	(J)	H	=	-107022	(J)	S	=	21.14	(J/K)	V	=	2.64	(cc)	Cp	=	10.8	(J/K)
	tephroite	fayalite	co-olivine	ni-olivine	monticellite	forsterite
	0.21	12.85	0	0	0.82	86.12
Total	solids	mass	=	8.52	(gm)	density	=	3.22	(gm/cc)
	G	=	-139225	(J)	H	=	-107022	(J)	S	=	21.14	(J/K)	V	=	2.64	(cc)	Cp	=	10.8	(J/K)
Viscosity	of	the	System:	2.32	(log	10	poise)
System	mass	=	100.09	(gm)	density	=	2.65	(gm/cc)
	G	=	-1.66748e+06	(J)	H	=	-1.24824e+06	(J)	S	=	275.25	(J/K)	V	=	37.79	(cc)	Cp	=	150.91	(J/K)
Oxygen	delta	moles	=	-0.000241967	delta	grams	=	-0.00774266
	G	=	85.28	(J)	H	=	-10.03	(J)	S	=	-0.06	(J/K)	V	=	-30.64	(cc)	Cp	=	-0.01	(J/K)
**********----------**********
Title:	Dummy	Title
T	=	1240	(C)	P	=	1	(kbars)	log(10)	f	O2	=	-7.79	delta	HM	=	-5.51	NNO	=	-0.67	QFM	=	0	COH	=	2.22	IW	=	3.47
Constraint	Flags:	fO2	path	=	QFM
Liquid	mass	=	90.61	(gm)	density	=	2.6	(gm/cc)	viscosity	=	2.27	(log	10	poise)	(analysis	in	wt	%)
	G	=	-1.51054e+06	(J)	H	=	-1.13143e+06	(J)	S	=	250.55	(J/K)	V	=	34.81	(cc)	Cp	=	138.44	(J/K)
	SiO2	TiO2	Al2O3	Fe2O3	Cr2O3	FeO	MnO	MgO	NiO	CoO	CaO	Na2O	K2O	P2O5	H2O	CO2	SO3	Cl2O-1	F2O-1
	50.97	0.24	19.36	1.2	0	6.9	0.14	9.05	0	0	9.04	2.42	0.12	0	0.55	0	0	0	0
olivine	mass	=	9.48	(gm)	density	=	3.23	(gm/cc)	(analysis	in	mole	%)
	(Ca0.00Mg0.87Fe''0.13Mn0.00Co0.00Ni0.00)2SiO4
	G	=	-154166	(J)	H	=	-118736	(J)	S	=	23.42	(J/K)	V	=	2.93	(cc)	Cp	=	11.98	(J/K)
	tephroite	fayalite	co-olivine	ni-olivine	monticellite	forsterite
	0.21	13.22	0	0	0.84	85.73
Total	solids	mass	=	9.48	(gm)	density	=	3.23	(gm/cc)
	G	=	-154166	(J)	H	=	-118736	(J)	S	=	23.42	(J/K)	V	=	2.93	(cc)	Cp	=	11.98	(J/K)
Viscosity	of	the	System:	2.41	(log	10	poise)
System	mass	=	100.09	(gm)	density	=	2.65	(gm/cc)
	G	=	-1.66471e+06	(J)	H	=	-1.25017e+06	(J)	S	=	273.96	(J/K)	V	=	37.74	(cc)	Cp	=	150.41	(J/K)
Oxygen	delta	moles	=	-0.000289544	delta	grams	=	-0.00926507
	G	=	101.3	(J)	H	=	-11.89	(J)	S	=	-0.07	(J/K)	V	=	-36.43	(cc)	Cp	=	-0.01	(J/K)
**********----------**********
Title:	Dummy	Title
T	=	1230	(C)	P	=	1	(kbars)	log(10)	f	O2	=	-7.9	delta	HM	=	-5.51	NNO	=	-0.67	QFM	=	0	COH	=	2.21	IW	=	3.48
Constraint	Flags:	fO2	path	=	QFM
Liquid	mass	=	89.69	(gm)	density	=	2.6	(gm/cc)	viscosity	=	2.35	(log	10	poise)	(analysis	in	wt	%)
	G	=	-1.49342e+06	(J)	H	=	-1.12202e+06	(J)	S	=	247.08	(J/K)	V	=	34.48	(cc)	Cp	=	136.81	(J/K)
	SiO2	TiO2	Al2O3	Fe2O3	Cr2O3	FeO	MnO	MgO	NiO	CoO	CaO	Na2O	K2O	P2O5	H2O	CO2	SO3	Cl2O-1	F2O-1
	51.09	0.25	19.56	1.2	0	6.82	0.14	8.7	0	0	9.13	2.44	0.12	0	0.56	0	0	0	0
olivine	mass	=	10.4	(gm)	density	=	3.24	(gm/cc)	(analysis	in	mole	%)
	(Ca0.00Mg0.86Fe''0.14Mn0.00Co0.00Ni0.00)2SiO4
	G	=	-168524	(J)	H	=	-130044	(J)	S	=	25.6	(J/K)	V	=	3.21	(cc)	Cp	=	13.11	(J/K)
	tephroite	fayalite	co-olivine	ni-olivine	monticellite	forsterite
	0.22	13.6	0	0	0.85	85.33
Total	solids	mass	=	10.4	(gm)	density	=	3.24	(gm/cc)
	G	=	-168524	(J)	H	=	-130044	(J)	S	=	25.6	(J/K)	V	=	3.21	(cc)	Cp	=	13.11	(J/K)
Viscosity	of	the	System:	2.51	(log	10	poise)
System	mass	=	100.09	(gm)	density	=	2.66	(gm/cc)
	G	=	-1.66195e+06	(J)	H	=	-1.25207e+06	(J)	S	=	272.68	(J/K)	V	=	37.69	(cc)	Cp	=	149.93	(J/K)
Oxygen	delta	moles	=	-0.000338567	delta	grams	=	-0.0108337
	G	=	117.58	(J)	H	=	-13.78	(J)	S	=	-0.09	(J/K)	V	=	-42.31	(cc)	Cp	=	-0.01	(J/K)
**********----------**********
Title:	Dummy	Title
T	=	1220	(C)	P	=	1	(kbars)	log(10)	f	O2	=	-8.01	delta	HM	=	-5.51	NNO	=	-0.67	QFM	=	0	COH	=	2.2	IW	=	3.5
Constraint	Flags:	fO2	path	=	QFM
Liquid	mass	=	88.79	(gm)	density	=	2.6	(gm/cc)	viscosity	=	2.43	(log	10	poise)	(analysis	in	wt	%)
	G	=	-1.47687e+06	(J)	H	=	-1.11298e+06	(J)	S	=	243.71	(J/K)	V	=	34.16	(cc)	Cp	=	135.24	(J/K)
	SiO2	TiO2	Al2O3	Fe2O3	Cr2O3	FeO	MnO	MgO	NiO	CoO	CaO	Na2O	K2O	P2O5	H2O	CO2	SO3	Cl2O-1	F2O-1
	51.21	0.25	19.76	1.19	0	6.73	0.14	8.36	0	0	9.22	2.47	0.12	0	0.56	0	0	0	0
olivine	mass	=	11.3	(gm)	density	=	3.24	(gm/cc)	(analysis	in	mole	%)
	(Ca0.00Mg0.86Fe''0.14Mn0.00Co0.00Ni0.00)2SiO4
	G	=	-182325	(J)	H	=	-140963	(J)	S	=	27.7	(J/K)	V	=	3.48	(cc)	Cp	=	14.21	(J/K)
	tephroite	fayalite	co-olivine	ni-olivine	monticellite	forsterite
	0.22	13.99	0	0	0.87	84.92
Total	solids	mass	=	11.3	(gm)	density	=	3.24	(gm/cc)
	G	=	-182325	(J)	H	=	-140963	(J)	S	=	27.7	(J/K)	V	=	3.48	(cc)	Cp	=	14.21	(J/K)
Viscosity	of	the	System:	2.61	(log	10	poise)
System	mass	=	100.09	(gm)	density	=	2.66	(gm/cc)
	G	=	-1.6592e+06	(J)	H	=	-1.25394e+06	(J)	S	=	271.41	(J/K)	V	=	37.64	(cc)	Cp	=	149.46	(J/K)
Oxygen	delta	moles	=	-0.000389097	delta	grams	=	-0.0124506
	G	=	134.13	(J)	H	=	-15.69	(J)	S	=	-0.1	(J/K)	V	=	-48.3	(cc)	Cp	=	-0.01	(J/K)
**********----------**********
Title:	Dummy	Title
T	=	1210	(C)	P	=	1	(kbars)	log(10)	f	O2	=	-8.12	delta	HM	=	-5.52	NNO	=	-0.67	QFM	=	0	COH	=	2.19	IW	=	3.51
Constraint	Flags:	fO2	path	=	QFM
Liquid	mass	=	87.91	(gm)	density	=	2.6	(gm/cc)	viscosity	=	2.51	(log	10	poise)	(analysis	in	wt	%)
	G	=	-1.46087e+06	(J)	H	=	-1.10429e+06	(J)	S	=	240.42	(J/K)	V	=	33.85	(cc)	Cp	=	133.73	(J/K)
	SiO2	TiO2	Al2O3	Fe2O3	Cr2O3	FeO	MnO	MgO	NiO	CoO	CaO	Na2O	K2O	P2O5	H2O	CO2	SO3	Cl2O-1	F2O-1
	51.33	0.25	19.95	1.18	0	6.63	0.14	8.02	0	0	9.3	2.49	0.13	0	0.57	0	0	0	0
olivine	mass	=	12.17	(gm)	density	=	3.25	(gm/cc)	(analysis	in	mole	%)
	(Ca0.00Mg0.85Fe''0.14Mn0.00Co0.00Ni0.00)2SiO4
	G	=	-195592	(J)	H	=	-151510	(J)	S	=	29.72	(J/K)	V	=	3.75	(cc)	Cp	=	15.27	(J/K)
	tephroite	fayalite	co-olivine	ni-olivine	monticellite	forsterite
	0.23	14.38	0	0	0.88	84.51
Total	solids	mass	=	12.17	(gm)	density	=	3.25	(gm/cc)
	G	=	-195592	(J)	H	=	-151510	(J)	S	=	29.72	(J/K)	V	=	3.75	(cc)	Cp	=	15.27	(J/K)
Viscosity	of	the	System:	2.71	(log	10	poise)
System	mass	=	100.08	(gm)	density	=	2.66	(gm/cc)
	G	=	-1.65646e+06	(J)	H	=	-1.2558e+06	(J)	S	=	270.14	(J/K)	V	=	37.59	(cc)	Cp	=	149	(J/K)
Oxygen	delta	moles	=	-0.000441193	delta	grams	=	-0.0141177
	G	=	150.95	(J)	H	=	-17.63	(J)	S	=	-0.11	(J/K)	V	=	-54.41	(cc)	Cp	=	-0.02	(J/K)
**********----------**********
Title:	Dummy	Title
T	=	1200	(C)	P	=	1	(kbars)	log(10)	f	O2	=	-8.23	delta	HM	=	-5.52	NNO	=	-0.66	QFM	=	0	COH	=	2.18	IW	=	3.52
Constraint	Flags:	fO2	path	=	QFM
Liquid	mass	=	84.2	(gm)	density	=	2.59	(gm/cc)	viscosity	=	2.61	(log	10	poise)	(analysis	in	wt	%)
	G	=	-1.39675e+06	(J)	H	=	-1.05856e+06	(J)	S	=	229.57	(J/K)	V	=	32.47	(cc)	Cp	=	124.37	(J/K)
	SiO2	TiO2	Al2O3	Fe2O3	Cr2O3	FeO	MnO	MgO	NiO	CoO	CaO	Na2O	K2O	P2O5	H2O	CO2	SO3	Cl2O-1	F2O-1
	51.64	0.26	19.94	1.19	0	6.63	0.14	7.65	0	0	9.27	2.55	0.13	0	0.59	0	0	0	0
olivine	mass	=	13.64	(gm)	density	=	3.26	(gm/cc)	(analysis	in	mole	%)
	(Ca0.00Mg0.85Fe''0.15Mn0.00Co0.00Ni0.00)2SiO4
	G	=	-217984	(J)	H	=	-169128	(J)	S	=	33.16	(J/K)	V	=	4.19	(cc)	Cp	=	17.06	(J/K)
	tephroite	fayalite	co-olivine	ni-olivine	monticellite	forsterite
	0.24	14.96	0	0	0.89	83.91
feldspar	mass	=	2.24	(gm)	density	=	2.68	(gm/cc)	(analysis	in	mole	%)
	K0.00Na0.19Ca0.81Al1.81Si2.19O8
	G	=	-38968.7	(J)	H	=	-30907.7	(J)	S	=	5.47	(J/K)	V	=	0.84	(cc)	Cp	=	2.76	(J/K)
	albite	anorthite	sanidine
	18.57	81.38	0.05
Total	solids	mass	=	15.88	(gm)	density	=	3.16	(gm/cc)
	G	=	-256953	(J)	H	=	-200035	(J)	S	=	38.64	(J/K)	V	=	5.03	(cc)	Cp	=	19.83	(J/K)
Viscosity	of	the	System:	2.88	(log	10	poise)
System	mass	=	100.08	(gm)	density	=	2.67	(gm/cc)
	G	=	-1.6537e+06	(J)	H	=	-1.2586e+06	(J)	S	=	268.2	(J/K)	V	=	37.5	(cc)	Cp	=	144.2	(J/K)
Oxygen	delta	moles	=	-0.000553348	delta	grams	=	-0.0177065
	G	=	187.89	(J)	H	=	-21.91	(J)	S	=	-0.14	(J/K)	V	=	-67.78	(cc)	Cp	=	-0.02	(J/K)
**********----------**********
Title:	Dummy	Title
T	=	1190	(C)	P	=	1	(kbars)	log(10)	f	O2	=	-8.34	delta	HM	=	-5.52	NNO	=	-0.66	QFM	=	0	COH	=	2.17	IW	=	3.53
Constraint	Flags:	fO2	path	=	QFM
Liquid	mass	=	75.26	(gm)	density	=	2.58	(gm/cc)	viscosity	=	2.72	(log	10	poise)	(analysis	in	wt	%)
	G	=	-1.24451e+06	(J)	H	=	-944794	(J)	S	=	204.84	(J/K)	V	=	29.14	(cc)	Cp	=	110.58	(J/K)
	SiO2	TiO2	Al2O3	Fe2O3	Cr2O3	FeO	MnO	MgO	NiO	CoO	CaO	Na2O	K2O	P2O5	H2O	CO2	SO3	Cl2O-1	F2O-1
	52.37	0.29	19.47	1.24	0	6.84	0.15	7.2	0	0	8.98	2.65	0.15	0	0.66	0	0	0	0
olivine	mass	=	16.17	(gm)	density	=	3.27	(gm/cc)	(analysis	in	mole	%)
	(Ca0.00Mg0.84Fe''0.16Mn0.00Co0.00Ni0.00)2SiO4
	G	=	-256351	(J)	H	=	-199090	(J)	S	=	39.14	(J/K)	V	=	4.94	(cc)	Cp	=	20.14	(J/K)
	tephroite	fayalite	co-olivine	ni-olivine	monticellite	forsterite
	0.26	15.97	0	0	0.88	82.89
feldspar	mass	=	8.65	(gm)	density	=	2.67	(gm/cc)	(analysis	in	mole	%)
	K0.00Na0.20Ca0.80Al1.80Si2.20O8
	G	=	-150043	(J)	H	=	-119248	(J)	S	=	21.05	(J/K)	V	=	3.23	(cc)	Cp	=	10.65	(J/K)
	albite	anorthite	sanidine
	19.87	80.07	0.06
Total	solids	mass	=	24.82	(gm)	density	=	3.04	(gm/cc)
	G	=	-406394	(J)	H	=	-318338	(J)	S	=	60.18	(J/K)	V	=	8.18	(cc)	Cp	=	30.79	(J/K)
Viscosity	of	the	System:	3.22	(log	10	poise)
System	mass	=	100.07	(gm)	density	=	2.68	(gm/cc)
	G	=	-1.6509e+06	(J)	H	=	-1.26313e+06	(J)	S	=	265.02	(J/K)	V	=	37.32	(cc)	Cp	=	141.37	(J/K)
Oxygen	delta	moles	=	-0.000787856	delta	grams	=	-0.0252105
	G	=	265.5	(J)	H	=	-30.91	(J)	S	=	-0.2	(J/K)	V	=	-95.84	(cc)	Cp	=	-0.03	(J/K)
**********----------**********
Title:	Dummy	Title
T	=	1180	(C)	P	=	1	(kbars)	log(10)	f	O2	=	-8.45	delta	HM	=	-5.52	NNO	=	-0.66	QFM	=	0	COH	=	2.16	IW	=	3.54
Constraint	Flags:	fO2	path	=	QFM
Liquid	mass	=	67.75	(gm)	density	=	2.57	(gm/cc)	viscosity	=	2.83	(log	10	poise)	(analysis	in	wt	%)
	G	=	-1.11747e+06	(J)	H	=	-849931	(J)	S	=	184.11	(J/K)	V	=	26.34	(cc)	Cp	=	99.07	(J/K)
	SiO2	TiO2	Al2O3	Fe2O3	Cr2O3	FeO	MnO	MgO	NiO	CoO	CaO	Na2O	K2O	P2O5	H2O	CO2	SO3	Cl2O-1	F2O-1
	53.1	0.32	19.04	1.27	0	6.98	0.15	6.78	0	0	8.72	2.74	0.16	0	0.74	0	0	0	0
olivine	mass	=	18.32	(gm)	density	=	3.28	(gm/cc)	(analysis	in	mole	%)
	(Ca0.00Mg0.83Fe''0.17Mn0.00Co0.00Ni0.00)2SiO4
	G	=	-288094	(J)	H	=	-223975	(J)	S	=	44.12	(J/K)	V	=	5.58	(cc)	Cp	=	22.72	(J/K)
	tephroite	fayalite	co-olivine	ni-olivine	monticellite	forsterite
	0.28	16.95	0	0	0.87	81.91
feldspar	mass	=	14	(gm)	density	=	2.67	(gm/cc)	(analysis	in	mole	%)
	K0.00Na0.21Ca0.79Al1.79Si2.21O8
	G	=	-242578	(J)	H	=	-193187	(J)	S	=	33.99	(J/K)	V	=	5.24	(cc)	Cp	=	17.22	(J/K)
	albite	anorthite	sanidine
	21.07	78.86	0.07
Total	solids	mass	=	32.32	(gm)	density	=	2.99	(gm/cc)
	G	=	-530672	(J)	H	=	-417163	(J)	S	=	78.11	(J/K)	V	=	10.82	(cc)	Cp	=	39.94	(J/K)
Viscosity	of	the	System:	3.59	(log	10	poise)
System	mass	=	100.07	(gm)	density	=	2.69	(gm/cc)
	G	=	-1.64814e+06	(J)	H	=	-1.26709e+06	(J)	S	=	262.22	(J/K)	V	=	37.16	(cc)	Cp	=	139.01	(J/K)
Oxygen	delta	moles	=	-0.00101061	delta	grams	=	-0.0323382
	G	=	337.96	(J)	H	=	-39.29	(J)	S	=	-0.26	(J/K)	V	=	-122.1	(cc)	Cp	=	-0.04	(J/K)
**********----------**********
Title:	Dummy	Title
T	=	1170	(C)	P	=	1	(kbars)	log(10)	f	O2	=	-8.57	delta	HM	=	-5.53	NNO	=	-0.66	QFM	=	0	COH	=	2.15	IW	=	3.55
Constraint	Flags:	fO2	path	=	QFM
Liquid	mass	=	61.21	(gm)	density	=	2.56	(gm/cc)	viscosity	=	2.94	(log	10	poise)	(analysis	in	wt	%)
	G	=	-1.00752e+06	(J)	H	=	-767808	(J)	S	=	166.1	(J/K)	V	=	23.91	(cc)	Cp	=	89.13	(J/K)
	SiO2	TiO2	Al2O3	Fe2O3	Cr2O3	FeO	MnO	MgO	NiO	CoO	CaO	Na2O	K2O	P2O5	H2O	CO2	SO3	Cl2O-1	F2O-1
	53.81	0.36	18.63	1.29	0	7.06	0.15	6.39	0	0	8.5	2.82	0.18	0	0.82	0	0	0	0
olivine	mass	=	20.03	(gm)	density	=	3.3	(gm/cc)	(analysis	in	mole	%)
	(Ca0.00Mg0.82Fe''0.18Mn0.00Co0.00Ni0.00)2SiO4
	G	=	-312564	(J)	H	=	-243268	(J)	S	=	48.02	(J/K)	V	=	6.08	(cc)	Cp	=	24.73	(J/K)
	tephroite	fayalite	co-olivine	ni-olivine	monticellite	forsterite
	0.3	17.89	0	0	0.86	80.95
orthopyroxene	mass	=	0.23	(gm)	density	=	3.23	(gm/cc)	(analysis	in	mole	%)
	opx	Na0.00Ca0.05Fe''0.31Mg1.56Fe'''0.02Ti0.00Al0.12Si1.93O6
	G	=	-3786.58	(J)	H	=	-2973.34	(J)	S	=	0.56	(J/K)	V	=	0.07	(cc)	Cp	=	0.3	(J/K)
	diopside	clinoenstatit	hedenbergite	alumino-buffo	buffonite	essenite	jadeite
	-33.17	94.4	31.39	5.2	-4.97	7.04	0.12
feldspar	mass	=	18.58	(gm)	density	=	2.67	(gm/cc)	(analysis	in	mole	%)
	K0.00Na0.22Ca0.78Al1.78Si2.22O8
	G	=	-321538	(J)	H	=	-256603	(J)	S	=	45	(J/K)	V	=	6.95	(cc)	Cp	=	22.84	(J/K)
	albite	anorthite	sanidine
	22.16	77.77	0.07
Total	solids	mass	=	38.85	(gm)	density	=	2.96	(gm/cc)
	G	=	-637889	(J)	H	=	-502845	(J)	S	=	93.58	(J/K)	V	=	13.1	(cc)	Cp	=	47.87	(J/K)
Viscosity	of	the	System:	4.01	(log	10	poise)
System	mass	=	100.06	(gm)	density	=	2.7	(gm/cc)
	G	=	-1.64541e+06	(J)	H	=	-1.27065e+06	(J)	S	=	259.68	(J/K)	V	=	37.01	(cc)	Cp	=	137	(J/K)
Oxygen	delta	moles	=	-0.00121871	delta	grams	=	-0.0389973
	G	=	404.43	(J)	H	=	-46.93	(J)	S	=	-0.31	(J/K)	V	=	-146.23	(cc)	Cp	=	-0.04	(J/K)
**********----------**********
Title:	Dummy	Title
T	=	1160	(C)	P	=	1	(kbars)	log(10)	f	O2	=	-8.69	delta	HM	=	-5.53	NNO	=	-0.65	QFM	=	0	COH	=	2.14	IW	=	3.57
Constraint	Flags:	fO2	path	=	QFM
Liquid	mass	=	53.28	(gm)	density	=	2.55	(gm/cc)	viscosity	=	2.97	(log	10	poise)	(analysis	in	wt	%)
	G	=	-874096	(J)	H	=	-666771	(J)	S	=	144.66	(J/K)	V	=	20.88	(cc)	Cp	=	77.38	(J/K)
	SiO2	TiO2	Al2O3	Fe2O3	Cr2O3	FeO	MnO	MgO	NiO	CoO	CaO	Na2O	K2O	P2O5	H2O	CO2	SO3	Cl2O-1	F2O-1
	53.94	0.41	18.35	1.35	0	7.29	0.17	6.04	0	0	8.33	2.98	0.2	0	0.94	0	0	0	0
olivine	mass	=	19.1	(gm)	density	=	3.31	(gm/cc)	(analysis	in	mole	%)
	(Ca0.00Mg0.81Fe''0.19Mn0.00Co0.00Ni0.00)2SiO4
	G	=	-295654	(J)	H	=	-230354	(J)	S	=	45.56	(J/K)	V	=	5.77	(cc)	Cp	=	23.48	(J/K)
	tephroite	fayalite	co-olivine	ni-olivine	monticellite	forsterite
	0.34	18.85	0	0	0.86	79.95
orthopyroxene	mass	=	4.45	(gm)	density	=	3.24	(gm/cc)	(analysis	in	mole	%)
	opx	Na0.00Ca0.06Fe''0.33Mg1.54Fe'''0.02Ti0.00Al0.12Si1.93O6
	G	=	-71812.4	(J)	H	=	-56484.4	(J)	S	=	10.7	(J/K)	V	=	1.37	(cc)	Cp	=	5.62	(J/K)
	diopside	clinoenstatit	hedenbergite	alumino-buffo	buffonite	essenite	jadeite
	-34.35	94.15	32.96	5.04	-4.78	6.87	0.12
feldspar	mass	=	23.22	(gm)	density	=	2.67	(gm/cc)	(analysis	in	mole	%)
	K0.00Na0.23Ca0.77Al1.77Si2.23O8
	G	=	-401195	(J)	H	=	-320862	(J)	S	=	56.05	(J/K)	V	=	8.69	(cc)	Cp	=	28.52	(J/K)
	albite	anorthite	sanidine
	22.87	77.05	0.08
Total	solids	mass	=	46.77	(gm)	density	=	2.95	(gm/cc)
	G	=	-768661	(J)	H	=	-607701	(J)	S	=	112.31	(J/K)	V	=	15.84	(cc)	Cp	=	57.61	(J/K)
Viscosity	of	the	System:	4.7	(log	10	poise)
System	mass	=	100.06	(gm)	density	=	2.72	(gm/cc)
	G	=	-1.64276e+06	(J)	H	=	-1.27447e+06	(J)	S	=	256.98	(J/K)	V	=	36.72	(cc)	Cp	=	134.99	(J/K)
Oxygen	delta	moles	=	-0.00134296	delta	grams	=	-0.0429732
	G	=	442.22	(J)	H	=	-51.23	(J)	S	=	-0.34	(J/K)	V	=	-160.02	(cc)	Cp	=	-0.05	(J/K)
**********----------**********
Title:	Dummy	Title
T	=	1150	(C)	P	=	1	(kbars)	log(10)	f	O2	=	-8.81	delta	HM	=	-5.53	NNO	=	-0.65	QFM	=	0	COH	=	2.13	IW	=	3.58
Constraint	Flags:	fO2	path	=	QFM
Liquid	mass	=	46.87	(gm)	density	=	2.54	(gm/cc)	viscosity	=	3	(log	10	poise)	(analysis	in	wt	%)
	G	=	-766880	(J)	H	=	-585642	(J)	S	=	127.35	(J/K)	V	=	18.45	(cc)	Cp	=	67.91	(J/K)
	SiO2	TiO2	Al2O3	Fe2O3	Cr2O3	FeO	MnO	MgO	NiO	CoO	CaO	Na2O	K2O	P2O5	H2O	CO2	SO3	Cl2O-1	F2O-1
	54.1	0.46	18.11	1.39	0	7.44	0.18	5.7	0	0	8.17	3.14	0.23	0	1.07	0	0	0	0
olivine	mass	=	18.46	(gm)	density	=	3.32	(gm/cc)	(analysis	in	mole	%)
	(Ca0.00Mg0.80Fe''0.20Mn0.00Co0.00Ni0.00)2SiO4
	G	=	-283552	(J)	H	=	-221188	(J)	S	=	43.82	(J/K)	V	=	5.56	(cc)	Cp	=	22.59	(J/K)
	tephroite	fayalite	co-olivine	ni-olivine	monticellite	forsterite
	0.38	19.74	0	0	0.87	79.01
orthopyroxene	mass	=	7.76	(gm)	density	=	3.25	(gm/cc)	(analysis	in	mole	%)
	opx	Na0.00Ca0.06Fe''0.34Mg1.53Fe'''0.02Ti0.00Al0.12Si1.93O6
	G	=	-124468	(J)	H	=	-98073.3	(J)	S	=	18.55	(J/K)	V	=	2.39	(cc)	Cp	=	9.75	(J/K)
	diopside	clinoenstatit	hedenbergite	alumino-buffo	buffonite	essenite	jadeite
	-35.43	93.9	34.42	4.89	-4.61	6.7	0.13
feldspar	mass	=	26.96	(gm)	density	=	2.67	(gm/cc)	(analysis	in	mole	%)
	K0.00Na0.23Ca0.76Al1.76Si2.24O8
	G	=	-465229	(J)	H	=	-372880	(J)	S	=	64.89	(J/K)	V	=	10.1	(cc)	Cp	=	33.08	(J/K)
	albite	anorthite	sanidine
	23.5	76.41	0.1
Total	solids	mass	=	53.18	(gm)	density	=	2.95	(gm/cc)
	G	=	-873249	(J)	H	=	-692141	(J)	S	=	127.26	(J/K)	V	=	18.04	(cc)	Cp	=	65.43	(J/K)
Viscosity	of	the	System:	6.91	(log	10	poise)
System	mass	=	100.05	(gm)	density	=	2.74	(gm/cc)
	G	=	-1.64013e+06	(J)	H	=	-1.27778e+06	(J)	S	=	254.61	(J/K)	V	=	36.49	(cc)	Cp	=	133.34	(J/K)
Oxygen	delta	moles	=	-0.00146801	delta	grams	=	-0.0469745
	G	=	479.63	(J)	H	=	-55.47	(J)	S	=	-0.38	(J/K)	V	=	-173.7	(cc)	Cp	=	-0.05	(J/K)
**********----------**********
Title:	Dummy	Title
T	=	1140	(C)	P	=	1	(kbars)	log(10)	f	O2	=	-8.93	delta	HM	=	-5.53	NNO	=	-0.65	QFM	=	0	COH	=	2.12	IW	=	3.59
Constraint	Flags:	fO2	path	=	QFM
Liquid	mass	=	41.59	(gm)	density	=	2.53	(gm/cc)	viscosity	=	3.04	(log	10	poise)	(analysis	in	wt	%)
	G	=	-679063	(J)	H	=	-519234	(J)	S	=	113.1	(J/K)	V	=	16.45	(cc)	Cp	=	60.14	(J/K)
	SiO2	TiO2	Al2O3	Fe2O3	Cr2O3	FeO	MnO	MgO	NiO	CoO	CaO	Na2O	K2O	P2O5	H2O	CO2	SO3	Cl2O-1	F2O-1
	54.29	0.51	17.9	1.42	0	7.52	0.19	5.39	0	0	8.02	3.3	0.25	0	1.2	0	0	0	0
olivine	mass	=	18.01	(gm)	density	=	3.33	(gm/cc)	(analysis	in	mole	%)
	(Ca0.00Mg0.79Fe''0.21Mn0.00Co0.00Ni0.00)2SiO4
	G	=	-274726	(J)	H	=	-214581	(J)	S	=	42.56	(J/K)	V	=	5.4	(cc)	Cp	=	21.96	(J/K)
	tephroite	fayalite	co-olivine	ni-olivine	monticellite	forsterite
	0.42	20.57	0	0	0.87	78.14
orthopyroxene	mass	=	10.4	(gm)	density	=	3.25	(gm/cc)	(analysis	in	mole	%)
	opx	Na0.00Ca0.06Fe''0.36Mg1.51Fe'''0.02Ti0.00Al0.11Si1.93O6
	G	=	-166097	(J)	H	=	-131113	(J)	S	=	24.76	(J/K)	V	=	3.2	(cc)	Cp	=	13.04	(J/K)
	diopside	clinoenstatit	hedenbergite	alumino-buffo	buffonite	essenite	jadeite
	-36.4	93.65	35.77	4.75	-4.44	6.54	0.13
feldspar	mass	=	30.04	(gm)	density	=	2.67	(gm/cc)	(analysis	in	mole	%)
	K0.00Na0.24Ca0.76Al1.76Si2.24O8
	G	=	-517638	(J)	H	=	-415787	(J)	S	=	72.07	(J/K)	V	=	11.25	(cc)	Cp	=	36.83	(J/K)
	albite	anorthite	sanidine
	24.06	75.83	0.11
Total	solids	mass	=	58.45	(gm)	density	=	2.94	(gm/cc)
	G	=	-958460	(J)	H	=	-761482	(J)	S	=	139.39	(J/K)	V	=	19.85	(cc)	Cp	=	71.83	(J/K)
Viscosity	of	the	System	cannot	be	computed.
System	mass	=	100.05	(gm)	density	=	2.76	(gm/cc)
	G	=	-1.63752e+06	(J)	H	=	-1.28072e+06	(J)	S	=	252.49	(J/K)	V	=	36.3	(cc)	Cp	=	131.97	(J/K)
Oxygen	delta	moles	=	-0.00159175	delta	grams	=	-0.0509341
	G	=	515.98	(J)	H	=	-59.56	(J)	S	=	-0.41	(J/K)	V	=	-187.02	(cc)	Cp	=	-0.06	(J/K)
**********----------**********
Title:	Dummy	Title
T	=	1130	(C)	P	=	1	(kbars)	log(10)	f	O2	=	-9.05	delta	HM	=	-5.54	NNO	=	-0.64	QFM	=	0	COH	=	2.11	IW	=	3.6
Constraint	Flags:	fO2	path	=	QFM
Liquid	mass	=	37.18	(gm)	density	=	2.52	(gm/cc)	viscosity	=	3.07	(log	10	poise)	(analysis	in	wt	%)
	G	=	-606026	(J)	H	=	-464030	(J)	S	=	101.2	(J/K)	V	=	14.77	(cc)	Cp	=	53.66	(J/K)
	SiO2	TiO2	Al2O3	Fe2O3	Cr2O3	FeO	MnO	MgO	NiO	CoO	CaO	Na2O	K2O	P2O5	H2O	CO2	SO3	Cl2O-1	F2O-1
	54.5	0.57	17.71	1.44	0	7.53	0.2	5.09	0	0	7.88	3.45	0.28	0	1.34	0	0	0	0
olivine	mass	=	17.7	(gm)	density	=	3.35	(gm/cc)	(analysis	in	mole	%)
	(Ca0.00Mg0.78Fe''0.21Mn0.00Co0.00Ni0.00)2SiO4
	G	=	-268145	(J)	H	=	-209736	(J)	S	=	41.63	(J/K)	V	=	5.29	(cc)	Cp	=	21.5	(J/K)
	tephroite	fayalite	co-olivine	ni-olivine	monticellite	forsterite
	0.45	21.33	0	0	0.88	77.33
orthopyroxene	mass	=	12.56	(gm)	density	=	3.26	(gm/cc)	(analysis	in	mole	%)
	opx	Na0.00Ca0.06Fe''0.37Mg1.50Fe'''0.02Ti0.00Al0.11Si1.93O6
	G	=	-199617	(J)	H	=	-157872	(J)	S	=	29.75	(J/K)	V	=	3.85	(cc)	Cp	=	15.7	(J/K)
	diopside	clinoenstatit	hedenbergite	alumino-buffo	buffonite	essenite	jadeite
	-37.27	93.42	37	4.63	-4.29	6.37	0.13
feldspar	mass	=	32.61	(gm)	density	=	2.67	(gm/cc)	(analysis	in	mole	%)
	K0.00Na0.25Ca0.75Al1.75Si2.25O8
	G	=	-561151	(J)	H	=	-451722	(J)	S	=	77.99	(J/K)	V	=	12.22	(cc)	Cp	=	39.94	(J/K)
	albite	anorthite	sanidine
	24.57	75.31	0.12
Total	solids	mass	=	62.87	(gm)	density	=	2.94	(gm/cc)
	G	=	-1.02891e+06	(J)	H	=	-819330	(J)	S	=	149.37	(J/K)	V	=	21.36	(cc)	Cp	=	77.14	(J/K)
Viscosity	of	the	System	cannot	be	computed.
System	mass	=	100.04	(gm)	density	=	2.77	(gm/cc)
	G	=	-1.63494e+06	(J)	H	=	-1.28336e+06	(J)	S	=	250.56	(J/K)	V	=	36.13	(cc)	Cp	=	130.8	(J/K)
Oxygen	delta	moles	=	-0.00171251	delta	grams	=	-0.0547983
	G	=	550.75	(J)	H	=	-63.46	(J)	S	=	-0.44	(J/K)	V	=	-199.79	(cc)	Cp	=	-0.06	(J/K)
**********----------**********
Title:	Dummy	Title
T	=	1120	(C)	P	=	1	(kbars)	log(10)	f	O2	=	-9.18	delta	HM	=	-5.54	NNO	=	-0.64	QFM	=	0	COH	=	2.09	IW	=	3.62
Constraint	Flags:	fO2	path	=	QFM
Liquid	mass	=	33.44	(gm)	density	=	2.5	(gm/cc)	viscosity	=	3.1	(log	10	poise)	(analysis	in	wt	%)
	G	=	-544516	(J)	H	=	-417552	(J)	S	=	91.13	(J/K)	V	=	13.36	(cc)	Cp	=	48.19	(J/K)
	SiO2	TiO2	Al2O3	Fe2O3	Cr2O3	FeO	MnO	MgO	NiO	CoO	CaO	Na2O	K2O	P2O5	H2O	CO2	SO3	Cl2O-1	F2O-1
	54.73	0.63	17.54	1.46	0	7.48	0.21	4.81	0	0	7.75	3.6	0.31	0	1.5	0	0	0	0
olivine	mass	=	17.48	(gm)	density	=	3.36	(gm/cc)	(analysis	in	mole	%)
	(Ca0.00Mg0.77Fe''0.22Mn0.00Co0.00Ni0.00)2SiO4
	G	=	-263101	(J)	H	=	-206101	(J)	S	=	40.91	(J/K)	V	=	5.21	(cc)	Cp	=	21.15	(J/K)
	tephroite	fayalite	co-olivine	ni-olivine	monticellite	forsterite
	0.49	22.04	0	0	0.88	76.59
orthopyroxene	mass	=	14.35	(gm)	density	=	3.27	(gm/cc)	(analysis	in	mole	%)
	opx	Na0.00Ca0.07Fe''0.38Mg1.49Fe'''0.02Ti0.00Al0.11Si1.93O6
	G	=	-227058	(J)	H	=	-179926	(J)	S	=	33.83	(J/K)	V	=	4.39	(cc)	Cp	=	17.89	(J/K)
	diopside	clinoenstatit	hedenbergite	alumino-buffo	buffonite	essenite	jadeite
	-38.04	93.18	38.12	4.52	-4.14	6.21	0.14
feldspar	mass	=	34.78	(gm)	density	=	2.67	(gm/cc)	(analysis	in	mole	%)
	K0.00Na0.25Ca0.75Al1.75Si2.25O8
	G	=	-597702	(J)	H	=	-482197	(J)	S	=	82.91	(J/K)	V	=	13.03	(cc)	Cp	=	42.56	(J/K)
	albite	anorthite	sanidine
	25.04	74.84	0.13
Total	solids	mass	=	66.6	(gm)	density	=	2.94	(gm/cc)
	G	=	-1.08786e+06	(J)	H	=	-868224	(J)	S	=	157.65	(J/K)	V	=	22.63	(cc)	Cp	=	81.6	(J/K)
Viscosity	of	the	System	cannot	be	computed.
System	mass	=	100.04	(gm)	density	=	2.78	(gm/cc)
	G	=	-1.63238e+06	(J)	H	=	-1.28578e+06	(J)	S	=	248.79	(J/K)	V	=	35.99	(cc)	Cp	=	129.8	(J/K)
Oxygen	delta	moles	=	-0.00182897	delta	grams	=	-0.0585248
	G	=	583.53	(J)	H	=	-67.11	(J)	S	=	-0.47	(J/K)	V	=	-211.85	(cc)	Cp	=	-0.07	(J/K)
**********----------**********
Title:	Dummy	Title
T	=	1110	(C)	P	=	1	(kbars)	log(10)	f	O2	=	-9.3	delta	HM	=	-5.54	NNO	=	-0.64	QFM	=	0	COH	=	2.08	IW	=	3.63
Constraint	Flags:	fO2	path	=	QFM
Liquid	mass	=	30.24	(gm)	density	=	2.49	(gm/cc)	viscosity	=	3.14	(log	10	poise)	(analysis	in	wt	%)
	G	=	-492169	(J)	H	=	-378004	(J)	S	=	82.54	(J/K)	V	=	12.15	(cc)	Cp	=	43.54	(J/K)
	SiO2	TiO2	Al2O3	Fe2O3	Cr2O3	FeO	MnO	MgO	NiO	CoO	CaO	Na2O	K2O	P2O5	H2O	CO2	SO3	Cl2O-1	F2O-1
	54.97	0.69	17.39	1.46	0	7.38	0.22	4.54	0	0	7.62	3.75	0.34	0	1.65	0	0	0	0
olivine	mass	=	17.32	(gm)	density	=	3.36	(gm/cc)	(analysis	in	mole	%)
	(Ca0.00Mg0.77Fe''0.23Mn0.01Co0.00Ni0.00)2SiO4
	G	=	-259094	(J)	H	=	-203291	(J)	S	=	40.35	(J/K)	V	=	5.15	(cc)	Cp	=	20.88	(J/K)
	tephroite	fayalite	co-olivine	ni-olivine	monticellite	forsterite
	0.52	22.68	0	0	0.88	75.92
orthopyroxene	mass	=	15.85	(gm)	density	=	3.27	(gm/cc)	(analysis	in	mole	%)
	opx	Na0.00Ca0.07Fe''0.39Mg1.47Fe'''0.02Ti0.00Al0.11Si1.94O6
	G	=	-249866	(J)	H	=	-198398	(J)	S	=	37.21	(J/K)	V	=	4.85	(cc)	Cp	=	19.71	(J/K)
	diopside	clinoenstatit	hedenbergite	alumino-buffo	buffonite	essenite	jadeite
	-38.72	92.96	39.14	4.43	-4.01	6.06	0.14
feldspar	mass	=	36.63	(gm)	density	=	2.67	(gm/cc)	(analysis	in	mole	%)
	K0.00Na0.25Ca0.74Al1.74Si2.26O8
	G	=	-628706	(J)	H	=	-508321	(J)	S	=	87.04	(J/K)	V	=	13.73	(cc)	Cp	=	44.79	(J/K)
	albite	anorthite	sanidine
	25.46	74.41	0.14
Total	solids	mass	=	69.8	(gm)	density	=	2.94	(gm/cc)
	G	=	-1.13767e+06	(J)	H	=	-910009	(J)	S	=	164.59	(J/K)	V	=	23.72	(cc)	Cp	=	85.39	(J/K)
Viscosity	of	the	System	cannot	be	computed.
System	mass	=	100.04	(gm)	density	=	2.79	(gm/cc)
	G	=	-1.62984e+06	(J)	H	=	-1.28801e+06	(J)	S	=	247.13	(J/K)	V	=	35.87	(cc)	Cp	=	128.92	(J/K)
Oxygen	delta	moles	=	-0.00194012	delta	grams	=	-0.0620815
	G	=	614.04	(J)	H	=	-70.49	(J)	S	=	-0.49	(J/K)	V	=	-223.11	(cc)	Cp	=	-0.07	(J/K)
**********----------**********
Title:	Dummy	Title
T	=	1100	(C)	P	=	1	(kbars)	log(10)	f	O2	=	-9.43	delta	HM	=	-5.54	NNO	=	-0.63	QFM	=	0	COH	=	2.07	IW	=	3.64
Constraint	Flags:	fO2	path	=	QFM
Liquid	mass	=	27.48	(gm)	density	=	2.47	(gm/cc)	viscosity	=	3.17	(log	10	poise)	(analysis	in	wt	%)
	G	=	-447217	(J)	H	=	-344040	(J)	S	=	75.14	(J/K)	V	=	11.11	(cc)	Cp	=	39.53	(J/K)
	SiO2	TiO2	Al2O3	Fe2O3	Cr2O3	FeO	MnO	MgO	NiO	CoO	CaO	Na2O	K2O	P2O5	H2O	CO2	SO3	Cl2O-1	F2O-1
	55.21	0.75	17.26	1.45	0	7.23	0.23	4.29	0	0	7.49	3.89	0.36	0	1.82	0	0	0	0
olivine	mass	=	17.19	(gm)	density	=	3.37	(gm/cc)	(analysis	in	mole	%)
	(Ca0.00Mg0.76Fe''0.23Mn0.01Co0.00Ni0.00)2SiO4
	G	=	-255777	(J)	H	=	-201032	(J)	S	=	39.87	(J/K)	V	=	5.1	(cc)	Cp	=	20.67	(J/K)
	tephroite	fayalite	co-olivine	ni-olivine	monticellite	forsterite
	0.55	23.26	0	0	0.87	75.31
orthopyroxene	mass	=	17.13	(gm)	density	=	3.28	(gm/cc)	(analysis	in	mole	%)
	opx	Na0.00Ca0.07Fe''0.40Mg1.46Fe'''0.02Ti0.00Al0.10Si1.94O6
	G	=	-269095	(J)	H	=	-214108	(J)	S	=	40.04	(J/K)	V	=	5.23	(cc)	Cp	=	21.26	(J/K)
	diopside	clinoenstatit	hedenbergite	alumino-buffo	buffonite	essenite	jadeite
	-39.31	92.75	40.05	4.34	-3.88	5.9	0.14
feldspar	mass	=	38.23	(gm)	density	=	2.67	(gm/cc)	(analysis	in	mole	%)
	K0.00Na0.26Ca0.74Al1.74Si2.26O8
	G	=	-655223	(J)	H	=	-530923	(J)	S	=	90.52	(J/K)	V	=	14.33	(cc)	Cp	=	46.7	(J/K)
	albite	anorthite	sanidine
	25.84	74.01	0.15
Total	solids	mass	=	72.55	(gm)	density	=	2.94	(gm/cc)
	G	=	-1.1801e+06	(J)	H	=	-946063	(J)	S	=	170.43	(J/K)	V	=	24.65	(cc)	Cp	=	88.63	(J/K)
Viscosity	of	the	System	cannot	be	computed.
System	mass	=	100.03	(gm)	density	=	2.8	(gm/cc)
	G	=	-1.62731e+06	(J)	H	=	-1.2901e+06	(J)	S	=	245.57	(J/K)	V	=	35.77	(cc)	Cp	=	128.16	(J/K)
Oxygen	delta	moles	=	-0.00204527	delta	grams	=	-0.0654461
	G	=	642.11	(J)	H	=	-73.57	(J)	S	=	-0.52	(J/K)	V	=	-233.5	(cc)	Cp	=	-0.07	(J/K)
**********----------**********
Title:	Dummy	Title
T	=	1090	(C)	P	=	1	(kbars)	log(10)	f	O2	=	-9.56	delta	HM	=	-5.55	NNO	=	-0.63	QFM	=	0	COH	=	2.06	IW	=	3.65
Constraint	Flags:	fO2	path	=	QFM
Liquid	mass	=	25.09	(gm)	density	=	2.46	(gm/cc)	viscosity	=	3.2	(log	10	poise)	(analysis	in	wt	%)
	G	=	-408307	(J)	H	=	-314634	(J)	S	=	68.72	(J/K)	V	=	10.21	(cc)	Cp	=	36.06	(J/K)
	SiO2	TiO2	Al2O3	Fe2O3	Cr2O3	FeO	MnO	MgO	NiO	CoO	CaO	Na2O	K2O	P2O5	H2O	CO2	SO3	Cl2O-1	F2O-1
	55.46	0.81	17.15	1.44	0	7.05	0.24	4.05	0	0	7.37	4.04	0.4	0	1.99	0	0	0	0
olivine	mass	=	17.08	(gm)	density	=	3.38	(gm/cc)	(analysis	in	mole	%)
	(Ca0.00Mg0.76Fe''0.24Mn0.01Co0.00Ni0.00)2SiO4
	G	=	-252905	(J)	H	=	-199134	(J)	S	=	39.45	(J/K)	V	=	5.05	(cc)	Cp	=	20.48	(J/K)
	tephroite	fayalite	co-olivine	ni-olivine	monticellite	forsterite
	0.58	23.79	0	0	0.87	74.76
orthopyroxene	mass	=	18.24	(gm)	density	=	3.28	(gm/cc)	(analysis	in	mole	%)
	opx	Na0.00Ca0.07Fe''0.41Mg1.46Fe'''0.02Ti0.00Al0.10Si1.94O6
	G	=	-285527	(J)	H	=	-227662	(J)	S	=	42.45	(J/K)	V	=	5.56	(cc)	Cp	=	22.59	(J/K)
	diopside	clinoenstatit	hedenbergite	alumino-buffo	buffonite	essenite	jadeite
	-39.82	92.55	40.87	4.26	-3.76	5.75	0.14
feldspar	mass	=	39.62	(gm)	density	=	2.67	(gm/cc)	(analysis	in	mole	%)
	K0.00Na0.26Ca0.74Al1.74Si2.26O8
	G	=	-678069	(J)	H	=	-550642	(J)	S	=	93.48	(J/K)	V	=	14.85	(cc)	Cp	=	48.35	(J/K)
	albite	anorthite	sanidine
	26.19	73.65	0.16
Total	solids	mass	=	74.94	(gm)	density	=	2.94	(gm/cc)
	G	=	-1.2165e+06	(J)	H	=	-977437	(J)	S	=	175.38	(J/K)	V	=	25.46	(cc)	Cp	=	91.42	(J/K)
Viscosity	of	the	System	cannot	be	computed.
System	mass	=	100.03	(gm)	density	=	2.8	(gm/cc)
	G	=	-1.62481e+06	(J)	H	=	-1.29207e+06	(J)	S	=	244.09	(J/K)	V	=	35.67	(cc)	Cp	=	127.48	(J/K)
Oxygen	delta	moles	=	-0.00214399	delta	grams	=	-0.068605
	G	=	667.64	(J)	H	=	-76.34	(J)	S	=	-0.55	(J/K)	V	=	-242.99	(cc)	Cp	=	-0.08	(J/K)
**********----------**********
Title:	Dummy	Title
T	=	1080	(C)	P	=	1	(kbars)	log(10)	f	O2	=	-9.69	delta	HM	=	-5.55	NNO	=	-0.63	QFM	=	0	COH	=	2.05	IW	=	3.67
Constraint	Flags:	fO2	path	=	QFM
Liquid	mass	=	22.99	(gm)	density	=	2.44	(gm/cc)	viscosity	=	3.23	(log	10	poise)	(analysis	in	wt	%)
	G	=	-374384	(J)	H	=	-288986	(J)	S	=	63.11	(J/K)	V	=	9.42	(cc)	Cp	=	33.04	(J/K)
	SiO2	TiO2	Al2O3	Fe2O3	Cr2O3	FeO	MnO	MgO	NiO	CoO	CaO	Na2O	K2O	P2O5	H2O	CO2	SO3	Cl2O-1	F2O-1
	55.71	0.87	17.05	1.43	0	6.84	0.25	3.83	0	0	7.24	4.18	0.43	0	2.17	0	0	0	0
olivine	mass	=	16.99	(gm)	density	=	3.39	(gm/cc)	(analysis	in	mole	%)
	(Ca0.00Mg0.75Fe''0.24Mn0.01Co0.00Ni0.00)2SiO4
	G	=	-250311	(J)	H	=	-197464	(J)	S	=	39.05	(J/K)	V	=	5.01	(cc)	Cp	=	20.31	(J/K)
	tephroite	fayalite	co-olivine	ni-olivine	monticellite	forsterite
	0.61	24.26	0	0	0.86	74.27
orthopyroxene	mass	=	19.21	(gm)	density	=	3.28	(gm/cc)	(analysis	in	mole	%)
	opx	Na0.00Ca0.07Fe''0.42Mg1.45Fe'''0.02Ti0.00Al0.10Si1.94O6
	G	=	-299746	(J)	H	=	-239515	(J)	S	=	44.51	(J/K)	V	=	5.85	(cc)	Cp	=	23.74	(J/K)
	diopside	clinoenstatit	hedenbergite	alumino-buffo	buffonite	essenite	jadeite
	-40.27	92.36	41.6	4.2	-3.64	5.61	0.15
feldspar	mass	=	40.83	(gm)	density	=	2.67	(gm/cc)	(analysis	in	mole	%)
	K0.00Na0.27Ca0.73Al1.73Si2.27O8
	G	=	-697882	(J)	H	=	-567976	(J)	S	=	96	(J/K)	V	=	15.3	(cc)	Cp	=	49.78	(J/K)
	albite	anorthite	sanidine
	26.52	73.31	0.17
Total	solids	mass	=	77.04	(gm)	density	=	2.94	(gm/cc)
	G	=	-1.24794e+06	(J)	H	=	-1.00495e+06	(J)	S	=	179.57	(J/K)	V	=	26.17	(cc)	Cp	=	93.83	(J/K)
Viscosity	of	the	System	cannot	be	computed.
System	mass	=	100.03	(gm)	density	=	2.81	(gm/cc)
	G	=	-1.62232e+06	(J)	H	=	-1.29394e+06	(J)	S	=	242.68	(J/K)	V	=	35.59	(cc)	Cp	=	126.87	(J/K)
Oxygen	delta	moles	=	-0.00223609	delta	grams	=	-0.0715522
	G	=	690.63	(J)	H	=	-78.81	(J)	S	=	-0.57	(J/K)	V	=	-251.57	(cc)	Cp	=	-0.08	(J/K)
**********----------**********
Title:	Dummy	Title
T	=	1070	(C)	P	=	1	(kbars)	log(10)	f	O2	=	-9.83	delta	HM	=	-5.55	NNO	=	-0.62	QFM	=	0	COH	=	2.04	IW	=	3.68
Constraint	Flags:	fO2	path	=	QFM
Liquid	mass	=	21.11	(gm)	density	=	2.42	(gm/cc)	viscosity	=	3.26	(log	10	poise)	(analysis	in	wt	%)
	G	=	-343983	(J)	H	=	-265985	(J)	S	=	58.07	(J/K)	V	=	8.71	(cc)	Cp	=	30.32	(J/K)
	SiO2	TiO2	Al2O3	Fe2O3	Cr2O3	FeO	MnO	MgO	NiO	CoO	CaO	Na2O	K2O	P2O5	H2O	CO2	SO3	Cl2O-1	F2O-1
	55.94	0.93	17.07	1.4	0	6.61	0.25	3.61	0	0	7.05	4.33	0.46	0	2.37	0	0	0	0
olivine	mass	=	16.87	(gm)	density	=	3.4	(gm/cc)	(analysis	in	mole	%)
	(Ca0.00Mg0.75Fe''0.25Mn0.01Co0.00Ni0.00)2SiO4
	G	=	-247349	(J)	H	=	-195507	(J)	S	=	38.6	(J/K)	V	=	4.97	(cc)	Cp	=	20.11	(J/K)
	tephroite	fayalite	co-olivine	ni-olivine	monticellite	forsterite
	0.63	24.7	0	0	0.85	73.82
orthopyroxene	mass	=	19.98	(gm)	density	=	3.29	(gm/cc)	(analysis	in	mole	%)
	opx	Na0.00Ca0.07Fe''0.42Mg1.44Fe'''0.02Ti0.00Al0.10Si1.94O6
	G	=	-310792	(J)	H	=	-248883	(J)	S	=	46.09	(J/K)	V	=	6.08	(cc)	Cp	=	24.65	(J/K)
	diopside	clinoenstatit	hedenbergite	alumino-buffo	buffonite	essenite	jadeite
	-40.94	92.36	42.28	4.21	-3.59	5.54	0.15
clinopyroxene	mass	=	0.25	(gm)	density	=	3.26	(gm/cc)	(analysis	in	mole	%)
	cpx	Na0.01Ca0.76Fe''0.22Mg0.87Fe'''0.05Ti0.02Al0.20Si1.87O6
	G	=	-3980.27	(J)	H	=	-3218.68	(J)	S	=	0.57	(J/K)	V	=	0.08	(cc)	Cp	=	0.3	(J/K)
	diopside	clinoenstatit	hedenbergite	alumino-buffo	buffonite	essenite	jadeite
	40.11	22.47	22.45	8.96	-5.02	9.56	1.47
feldspar	mass	=	41.82	(gm)	density	=	2.67	(gm/cc)	(analysis	in	mole	%)
	K0.00Na0.27Ca0.73Al1.73Si2.27O8
	G	=	-713757	(J)	H	=	-582165	(J)	S	=	97.97	(J/K)	V	=	15.67	(cc)	Cp	=	50.93	(J/K)
	albite	anorthite	sanidine
	26.89	72.93	0.18
Total	solids	mass	=	78.92	(gm)	density	=	2.95	(gm/cc)
	G	=	-1.27588e+06	(J)	H	=	-1.02977e+06	(J)	S	=	183.23	(J/K)	V	=	26.8	(cc)	Cp	=	95.99	(J/K)
Viscosity	of	the	System	cannot	be	computed.
System	mass	=	100.02	(gm)	density	=	2.82	(gm/cc)
	G	=	-1.61986e+06	(J)	H	=	-1.29576e+06	(J)	S	=	241.3	(J/K)	V	=	35.5	(cc)	Cp	=	126.31	(J/K)
Oxygen	delta	moles	=	-0.00231263	delta	grams	=	-0.0740013
	G	=	708.39	(J)	H	=	-80.67	(J)	S	=	-0.59	(J/K)	V	=	-258.26	(cc)	Cp	=	-0.08	(J/K)
**********----------**********
Title:	Dummy	Title
T	=	1060	(C)	P	=	1	(kbars)	log(10)	f	O2	=	-9.96	delta	HM	=	-5.55	NNO	=	-0.62	QFM	=	0	COH	=	2.02	IW	=	3.7
Constraint	Flags:	fO2	path	=	QFM
Liquid	mass	=	19.4	(gm)	density	=	2.41	(gm/cc)	viscosity	=	3.29	(log	10	poise)	(analysis	in	wt	%)
	G	=	-316595	(J)	H	=	-245247	(J)	S	=	53.52	(J/K)	V	=	8.06	(cc)	Cp	=	27.87	(J/K)
	SiO2	TiO2	Al2O3	Fe2O3	Cr2O3	FeO	MnO	MgO	NiO	CoO	CaO	Na2O	K2O	P2O5	H2O	CO2	SO3	Cl2O-1	F2O-1
	56.15	0.97	17.2	1.36	0	6.35	0.26	3.39	0	0	6.77	4.47	0.5	0	2.58	0	0	0	0
olivine	mass	=	16.71	(gm)	density	=	3.4	(gm/cc)	(analysis	in	mole	%)
	(Ca0.00Mg0.74Fe''0.25Mn0.01Co0.00Ni0.00)2SiO4
	G	=	-243924	(J)	H	=	-193185	(J)	S	=	38.06	(J/K)	V	=	4.91	(cc)	Cp	=	19.87	(J/K)
	tephroite	fayalite	co-olivine	ni-olivine	monticellite	forsterite
	0.66	25.11	0	0	0.81	73.41
orthopyroxene	mass	=	20.59	(gm)	density	=	3.29	(gm/cc)	(analysis	in	mole	%)
	opx	Na0.00Ca0.07Fe''0.43Mg1.44Fe'''0.02Ti0.00Al0.10Si1.94O6
	G	=	-319357	(J)	H	=	-256303	(J)	S	=	47.3	(J/K)	V	=	6.26	(cc)	Cp	=	25.36	(J/K)
	diopside	clinoenstatit	hedenbergite	alumino-buffo	buffonite	essenite	jadeite
	-41.85	92.55	42.91	4.29	-3.6	5.55	0.15
clinopyroxene	mass	=	0.72	(gm)	density	=	3.27	(gm/cc)	(analysis	in	mole	%)
	cpx	Na0.02Ca0.77Fe''0.22Mg0.86Fe'''0.05Ti0.02Al0.21Si1.86O6
	G	=	-11298.1	(J)	H	=	-9158.84	(J)	S	=	1.6	(J/K)	V	=	0.22	(cc)	Cp	=	0.84	(J/K)
	diopside	clinoenstatit	hedenbergite	alumino-buffo	buffonite	essenite	jadeite
	40.7	21.3	22.18	9.62	-4.85	9.51	1.54
feldspar	mass	=	42.61	(gm)	density	=	2.67	(gm/cc)	(analysis	in	mole	%)
	K0.00Na0.27Ca0.73Al1.73Si2.27O8
	G	=	-726246	(J)	H	=	-593640	(J)	S	=	99.47	(J/K)	V	=	15.97	(cc)	Cp	=	51.84	(J/K)
	albite	anorthite	sanidine
	27.3	72.52	0.19
Total	solids	mass	=	80.62	(gm)	density	=	2.95	(gm/cc)
	G	=	-1.30083e+06	(J)	H	=	-1.05229e+06	(J)	S	=	186.43	(J/K)	V	=	27.36	(cc)	Cp	=	97.91	(J/K)
Viscosity	of	the	System	cannot	be	computed.
System	mass	=	100.02	(gm)	density	=	2.82	(gm/cc)
	G	=	-1.61742e+06	(J)	H	=	-1.29753e+06	(J)	S	=	239.95	(J/K)	V	=	35.42	(cc)	Cp	=	125.78	(J/K)
Oxygen	delta	moles	=	-0.00237232	delta	grams	=	-0.0759113
	G	=	720.65	(J)	H	=	-81.9	(J)	S	=	-0.6	(J/K)	V	=	-262.95	(cc)	Cp	=	-0.09	(J/K)
**********----------**********
Title:	Dummy	Title
T	=	1050	(C)	P	=	1	(kbars)	log(10)	f	O2	=	-10.1	delta	HM	=	-5.56	NNO	=	-0.62	QFM	=	0	COH	=	2.01	IW	=	3.71
Constraint	Flags:	fO2	path	=	QFM
Liquid	mass	=	17.88	(gm)	density	=	2.39	(gm/cc)	viscosity	=	3.32	(log	10	poise)	(analysis	in	wt	%)
	G	=	-292308	(J)	H	=	-226837	(J)	S	=	49.48	(J/K)	V	=	7.49	(cc)	Cp	=	25.7	(J/K)
	SiO2	TiO2	Al2O3	Fe2O3	Cr2O3	FeO	MnO	MgO	NiO	CoO	CaO	Na2O	K2O	P2O5	H2O	CO2	SO3	Cl2O-1	F2O-1
	56.36	1	17.34	1.32	0	6.09	0.27	3.18	0	0	6.51	4.62	0.53	0	2.8	0	0	0	0
olivine	mass	=	16.54	(gm)	density	=	3.41	(gm/cc)	(analysis	in	mole	%)
	(Ca0.00Mg0.74Fe''0.25Mn0.01Co0.00Ni0.00)2SiO4
	G	=	-240515	(J)	H	=	-190878	(J)	S	=	37.51	(J/K)	V	=	4.85	(cc)	Cp	=	19.63	(J/K)
	tephroite	fayalite	co-olivine	ni-olivine	monticellite	forsterite
	0.68	25.48	0	0	0.78	73.05
orthopyroxene	mass	=	21.16	(gm)	density	=	3.3	(gm/cc)	(analysis	in	mole	%)
	opx	Na0.00Ca0.07Fe''0.43Mg1.43Fe'''0.02Ti0.00Al0.10Si1.94O6
	G	=	-327266	(J)	H	=	-263235	(J)	S	=	48.39	(J/K)	V	=	6.42	(cc)	Cp	=	26.02	(J/K)
	diopside	clinoenstatit	hedenbergite	alumino-buffo	buffonite	essenite	jadeite
	-42.71	92.75	43.48	4.38	-3.61	5.56	0.15
clinopyroxene	mass	=	1.13	(gm)	density	=	3.27	(gm/cc)	(analysis	in	mole	%)
	cpx	Na0.02Ca0.78Fe''0.22Mg0.84Fe'''0.05Ti0.03Al0.21Si1.85O6
	G	=	-17740.9	(J)	H	=	-14417.2	(J)	S	=	2.51	(J/K)	V	=	0.34	(cc)	Cp	=	1.32	(J/K)
	diopside	clinoenstatit	hedenbergite	alumino-buffo	buffonite	essenite	jadeite
	41.21	20.11	21.86	10.41	-4.65	9.44	1.61
feldspar	mass	=	43.31	(gm)	density	=	2.67	(gm/cc)	(analysis	in	mole	%)
	K0.00Na0.28Ca0.72Al1.72Si2.28O8
	G	=	-737169	(J)	H	=	-603879	(J)	S	=	100.74	(J/K)	V	=	16.23	(cc)	Cp	=	52.64	(J/K)
	albite	anorthite	sanidine
	27.69	72.12	0.2
Total	solids	mass	=	82.14	(gm)	density	=	2.95	(gm/cc)
	G	=	-1.32269e+06	(J)	H	=	-1.07241e+06	(J)	S	=	189.16	(J/K)	V	=	27.85	(cc)	Cp	=	99.6	(J/K)
Viscosity	of	the	System	cannot	be	computed.
System	mass	=	100.02	(gm)	density	=	2.83	(gm/cc)
	G	=	-1.615e+06	(J)	H	=	-1.29925e+06	(J)	S	=	238.64	(J/K)	V	=	35.34	(cc)	Cp	=	125.3	(J/K)
Oxygen	delta	moles	=	-0.0024246	delta	grams	=	-0.0775844
	G	=	730.39	(J)	H	=	-82.83	(J)	S	=	-0.61	(J/K)	V	=	-266.73	(cc)	Cp	=	-0.09	(J/K)
**********----------**********
Title:	Dummy	Title
T	=	1040	(C)	P	=	1	(kbars)	log(10)	f	O2	=	-10.24	delta	HM	=	-5.56	NNO	=	-0.61	QFM	=	0	COH	=	2	IW	=	3.72
Constraint	Flags:	fO2	path	=	QFM
Liquid	mass	=	16.53	(gm)	density	=	2.37	(gm/cc)	viscosity	=	3.34	(log	10	poise)	(analysis	in	wt	%)
	G	=	-270601	(J)	H	=	-210361	(J)	S	=	45.87	(J/K)	V	=	6.98	(cc)	Cp	=	23.76	(J/K)
	SiO2	TiO2	Al2O3	Fe2O3	Cr2O3	FeO	MnO	MgO	NiO	CoO	CaO	Na2O	K2O	P2O5	H2O	CO2	SO3	Cl2O-1	F2O-1
	56.54	1.01	17.49	1.27	0	5.82	0.28	2.99	0	0	6.25	4.76	0.57	0	3.02	0	0	0	0
olivine	mass	=	16.37	(gm)	density	=	3.41	(gm/cc)	(analysis	in	mole	%)
	(Ca0.00Mg0.73Fe''0.26Mn0.01Co0.00Ni0.00)2SiO4
	G	=	-237074	(J)	H	=	-188547	(J)	S	=	36.96	(J/K)	V	=	4.79	(cc)	Cp	=	19.38	(J/K)
	tephroite	fayalite	co-olivine	ni-olivine	monticellite	forsterite
	0.71	25.81	0	0	0.75	72.73
orthopyroxene	mass	=	21.7	(gm)	density	=	3.3	(gm/cc)	(analysis	in	mole	%)
	opx	Na0.00Ca0.07Fe''0.44Mg1.43Fe'''0.02Ti0.00Al0.10Si1.94O6
	G	=	-334703	(J)	H	=	-269823	(J)	S	=	49.41	(J/K)	V	=	6.58	(cc)	Cp	=	26.64	(J/K)
	diopside	clinoenstatit	hedenbergite	alumino-buffo	buffonite	essenite	jadeite
	-43.52	92.95	44	4.47	-3.62	5.56	0.15
clinopyroxene	mass	=	1.49	(gm)	density	=	3.28	(gm/cc)	(analysis	in	mole	%)
	cpx	Na0.02Ca0.79Fe''0.21Mg0.83Fe'''0.05Ti0.03Al0.22Si1.84O6
	G	=	-23447.5	(J)	H	=	-19101.9	(J)	S	=	3.31	(J/K)	V	=	0.46	(cc)	Cp	=	1.74	(J/K)
	diopside	clinoenstatit	hedenbergite	alumino-buffo	buffonite	essenite	jadeite
	41.62	18.93	21.5	11.34	-4.42	9.35	1.69
feldspar	mass	=	43.93	(gm)	density	=	2.67	(gm/cc)	(analysis	in	mole	%)
	K0.00Na0.28Ca0.72Al1.72Si2.28O8
	G	=	-746768	(J)	H	=	-613071	(J)	S	=	101.81	(J/K)	V	=	16.47	(cc)	Cp	=	53.34	(J/K)
	albite	anorthite	sanidine
	28.06	71.74	0.2
Total	solids	mass	=	83.49	(gm)	density	=	2.95	(gm/cc)
	G	=	-1.34199e+06	(J)	H	=	-1.09054e+06	(J)	S	=	191.49	(J/K)	V	=	28.29	(cc)	Cp	=	101.09	(J/K)
Viscosity	of	the	System	cannot	be	computed.
System	mass	=	100.02	(gm)	density	=	2.84	(gm/cc)
	G	=	-1.61259e+06	(J)	H	=	-1.3009e+06	(J)	S	=	237.36	(J/K)	V	=	35.27	(cc)	Cp	=	124.86	(J/K)
Oxygen	delta	moles	=	-0.00247025	delta	grams	=	-0.0790449
	G	=	737.88	(J)	H	=	-83.5	(J)	S	=	-0.63	(J/K)	V	=	-269.7	(cc)	Cp	=	-0.09	(J/K)
**********----------**********
Title:	Dummy	Title
T	=	1030	(C)	P	=	1	(kbars)	log(10)	f	O2	=	-10.38	delta	HM	=	-5.56	NNO	=	-0.61	QFM	=	0	COH	=	1.99	IW	=	3.74
Constraint	Flags:	fO2	path	=	QFM
Liquid	mass	=	15.31	(gm)	density	=	2.35	(gm/cc)	viscosity	=	3.35	(log	10	poise)	(analysis	in	wt	%)
	G	=	-251060	(J)	H	=	-195507	(J)	S	=	42.63	(J/K)	V	=	6.51	(cc)	Cp	=	22.02	(J/K)
	SiO2	TiO2	Al2O3	Fe2O3	Cr2O3	FeO	MnO	MgO	NiO	CoO	CaO	Na2O	K2O	P2O5	H2O	CO2	SO3	Cl2O-1	F2O-1
	56.72	1.01	17.64	1.23	0	5.55	0.28	2.81	0	0	5.99	4.9	0.61	0	3.27	0	0	0	0
olivine	mass	=	16.18	(gm)	density	=	3.42	(gm/cc)	(analysis	in	mole	%)
	(Ca0.00Mg0.73Fe''0.26Mn0.01Co0.00Ni0.00)2SiO4
	G	=	-233581	(J)	H	=	-186172	(J)	S	=	36.38	(J/K)	V	=	4.73	(cc)	Cp	=	19.12	(J/K)
	tephroite	fayalite	co-olivine	ni-olivine	monticellite	forsterite
	0.73	26.1	0	0	0.72	72.44
orthopyroxene	mass	=	22.21	(gm)	density	=	3.3	(gm/cc)	(analysis	in	mole	%)
	opx	Na0.00Ca0.07Fe''0.44Mg1.43Fe'''0.02Ti0.00Al0.10Si1.94O6
	G	=	-341805	(J)	H	=	-276175	(J)	S	=	50.36	(J/K)	V	=	6.73	(cc)	Cp	=	27.23	(J/K)
	diopside	clinoenstatit	hedenbergite	alumino-buffo	buffonite	essenite	jadeite
	-44.27	93.15	44.47	4.56	-3.63	5.57	0.15
clinopyroxene	mass	=	1.82	(gm)	density	=	3.28	(gm/cc)	(analysis	in	mole	%)
	cpx	Na0.02Ca0.80Fe''0.21Mg0.82Fe'''0.05Ti0.04Al0.23Si1.83O6
	G	=	-28507	(J)	H	=	-23281.3	(J)	S	=	4.01	(J/K)	V	=	0.55	(cc)	Cp	=	2.12	(J/K)
	diopside	clinoenstatit	hedenbergite	alumino-buffo	buffonite	essenite	jadeite
	41.9	17.74	21.1	12.42	-4.15	9.23	1.76
feldspar	mass	=	44.49	(gm)	density	=	2.67	(gm/cc)	(analysis	in	mole	%)
	K0.00Na0.28Ca0.71Al1.71Si2.29O8
	G	=	-755250	(J)	H	=	-621381	(J)	S	=	102.73	(J/K)	V	=	16.68	(cc)	Cp	=	53.96	(J/K)
	albite	anorthite	sanidine
	28.41	71.38	0.21
Total	solids	mass	=	84.71	(gm)	density	=	2.95	(gm/cc)
	G	=	-1.35914e+06	(J)	H	=	-1.10701e+06	(J)	S	=	193.48	(J/K)	V	=	28.69	(cc)	Cp	=	102.43	(J/K)
Viscosity	of	the	System	cannot	be	computed.
System	mass	=	100.02	(gm)	density	=	2.84	(gm/cc)
	G	=	-1.6102e+06	(J)	H	=	-1.30252e+06	(J)	S	=	236.11	(J/K)	V	=	35.2	(cc)	Cp	=	124.45	(J/K)
Oxygen	delta	moles	=	-0.00251013	delta	grams	=	-0.0803211
	G	=	743.44	(J)	H	=	-83.95	(J)	S	=	-0.63	(J/K)	V	=	-271.97	(cc)	Cp	=	-0.09	(J/K)
**********----------**********
Title:	Dummy	Title
T	=	1020	(C)	P	=	1	(kbars)	log(10)	f	O2	=	-10.53	delta	HM	=	-5.56	NNO	=	-0.61	QFM	=	0	COH	=	1.97	IW	=	3.75
Constraint	Flags:	fO2	path	=	QFM
Liquid	mass	=	14.21	(gm)	density	=	2.33	(gm/cc)	viscosity	=	3.36	(log	10	poise)	(analysis	in	wt	%)
	G	=	-233359	(J)	H	=	-182028	(J)	S	=	39.7	(J/K)	V	=	6.09	(cc)	Cp	=	20.45	(J/K)
	SiO2	TiO2	Al2O3	Fe2O3	Cr2O3	FeO	MnO	MgO	NiO	CoO	CaO	Na2O	K2O	P2O5	H2O	CO2	SO3	Cl2O-1	F2O-1
	56.88	0.99	17.79	1.19	0	5.28	0.29	2.64	0	0	5.74	5.03	0.65	0	3.52	0	0	0	0
olivine	mass	=	15.99	(gm)	density	=	3.42	(gm/cc)	(analysis	in	mole	%)
	(Ca0.00Mg0.73Fe''0.26Mn0.01Co0.00Ni0.00)2SiO4
	G	=	-230038	(J)	H	=	-183753	(J)	S	=	35.79	(J/K)	V	=	4.67	(cc)	Cp	=	18.85	(J/K)
	tephroite	fayalite	co-olivine	ni-olivine	monticellite	forsterite
	0.76	26.37	0	0	0.69	72.19
orthopyroxene	mass	=	22.71	(gm)	density	=	3.31	(gm/cc)	(analysis	in	mole	%)
	opx	Na0.00Ca0.07Fe''0.45Mg1.42Fe'''0.02Ti0.00Al0.10Si1.93O6
	G	=	-348664	(J)	H	=	-282362	(J)	S	=	51.27	(J/K)	V	=	6.87	(cc)	Cp	=	27.8	(J/K)
	diopside	clinoenstatit	hedenbergite	alumino-buffo	buffonite	essenite	jadeite
	-44.97	93.35	44.9	4.65	-3.65	5.57	0.15
clinopyroxene	mass	=	2.11	(gm)	density	=	3.29	(gm/cc)	(analysis	in	mole	%)
	cpx	Na0.02Ca0.82Fe''0.21Mg0.80Fe'''0.05Ti0.05Al0.25Si1.81O6
	G	=	-32967.5	(J)	H	=	-26990.8	(J)	S	=	4.62	(J/K)	V	=	0.64	(cc)	Cp	=	2.44	(J/K)
	diopside	clinoenstatit	hedenbergite	alumino-buffo	buffonite	essenite	jadeite
	42.04	16.56	20.68	13.65	-3.85	9.08	1.84
feldspar	mass	=	45	(gm)	density	=	2.67	(gm/cc)	(analysis	in	mole	%)
	K0.00Na0.29Ca0.71Al1.71Si2.29O8
	G	=	-762800	(J)	H	=	-628956	(J)	S	=	103.5	(J/K)	V	=	16.87	(cc)	Cp	=	54.51	(J/K)
	albite	anorthite	sanidine
	28.74	71.04	0.22
Total	solids	mass	=	85.81	(gm)	density	=	2.95	(gm/cc)
	G	=	-1.37447e+06	(J)	H	=	-1.12206e+06	(J)	S	=	195.19	(J/K)	V	=	29.05	(cc)	Cp	=	103.62	(J/K)
Viscosity	of	the	System	cannot	be	computed.
System	mass	=	100.02	(gm)	density	=	2.85	(gm/cc)
	G	=	-1.60783e+06	(J)	H	=	-1.30409e+06	(J)	S	=	234.88	(J/K)	V	=	35.14	(cc)	Cp	=	124.07	(J/K)
Oxygen	delta	moles	=	-0.00254529	delta	grams	=	-0.0814462
	G	=	747.42	(J)	H	=	-84.21	(J)	S	=	-0.64	(J/K)	V	=	-273.66	(cc)	Cp	=	-0.09	(J/K)
**********----------**********
Title:	Dummy	Title
T	=	1010	(C)	P	=	1	(kbars)	log(10)	f	O2	=	-10.67	delta	HM	=	-5.57	NNO	=	-0.6	QFM	=	0	COH	=	1.96	IW	=	3.77
Constraint	Flags:	fO2	path	=	QFM
Liquid	mass	=	13.2	(gm)	density	=	2.31	(gm/cc)	viscosity	=	3.36	(log	10	poise)	(analysis	in	wt	%)
	G	=	-217244	(J)	H	=	-169732	(J)	S	=	37.03	(J/K)	V	=	5.71	(cc)	Cp	=	19.03	(J/K)
	SiO2	TiO2	Al2O3	Fe2O3	Cr2O3	FeO	MnO	MgO	NiO	CoO	CaO	Na2O	K2O	P2O5	H2O	CO2	SO3	Cl2O-1	F2O-1
	57.02	0.96	17.95	1.14	0	5.01	0.3	2.48	0	0	5.49	5.17	0.69	0	3.79	0	0	0	0
olivine	mass	=	15.79	(gm)	density	=	3.43	(gm/cc)	(analysis	in	mole	%)
	(Ca0.00Mg0.73Fe''0.27Mn0.01Co0.00Ni0.00)2SiO4
	G	=	-226473	(J)	H	=	-181313	(J)	S	=	35.19	(J/K)	V	=	4.61	(cc)	Cp	=	18.58	(J/K)
	tephroite	fayalite	co-olivine	ni-olivine	monticellite	forsterite
	0.78	26.6	0	0	0.66	71.96
orthopyroxene	mass	=	23.2	(gm)	density	=	3.31	(gm/cc)	(analysis	in	mole	%)
	opx	Na0.00Ca0.06Fe''0.45Mg1.42Fe'''0.02Ti0.01Al0.10Si1.93O6
	G	=	-355319	(J)	H	=	-288415	(J)	S	=	52.14	(J/K)	V	=	7.01	(cc)	Cp	=	28.36	(J/K)
	diopside	clinoenstatit	hedenbergite	alumino-buffo	buffonite	essenite	jadeite
	-45.6	93.54	45.29	4.72	-3.67	5.57	0.15
clinopyroxene	mass	=	2.36	(gm)	density	=	3.29	(gm/cc)	(analysis	in	mole	%)
	cpx	Na0.02Ca0.83Fe''0.20Mg0.79Fe'''0.05Ti0.06Al0.26Si1.80O6
	G	=	-36847.6	(J)	H	=	-30242.2	(J)	S	=	5.15	(J/K)	V	=	0.72	(cc)	Cp	=	2.73	(J/K)
	diopside	clinoenstatit	hedenbergite	alumino-buffo	buffonite	essenite	jadeite
	42.03	15.41	20.24	15.04	-3.52	8.9	1.92
feldspar	mass	=	45.46	(gm)	density	=	2.67	(gm/cc)	(analysis	in	mole	%)
	K0.00Na0.29Ca0.71Al1.71Si2.29O8
	G	=	-769586	(J)	H	=	-635929	(J)	S	=	104.16	(J/K)	V	=	17.04	(cc)	Cp	=	55.22	(J/K)
	albite	anorthite	sanidine
	29.05	70.71	0.24
Total	solids	mass	=	86.81	(gm)	density	=	2.96	(gm/cc)
	G	=	-1.38822e+06	(J)	H	=	-1.1359e+06	(J)	S	=	196.65	(J/K)	V	=	29.38	(cc)	Cp	=	104.89	(J/K)
Viscosity	of	the	System	cannot	be	computed.
System	mass	=	100.02	(gm)	density	=	2.85	(gm/cc)
	G	=	-1.60547e+06	(J)	H	=	-1.30563e+06	(J)	S	=	233.67	(J/K)	V	=	35.08	(cc)	Cp	=	123.92	(J/K)
Oxygen	delta	moles	=	-0.00257694	delta	grams	=	-0.0824589
	G	=	750.2	(J)	H	=	-84.33	(J)	S	=	-0.65	(J/K)	V	=	-274.92	(cc)	Cp	=	-0.09	(J/K)
**********----------**********
Title:	Dummy	Title
T	=	1000	(C)	P	=	1	(kbars)	log(10)	f	O2	=	-10.82	delta	HM	=	-5.57	NNO	=	-0.6	QFM	=	0	COH	=	1.95	IW	=	3.78
Constraint	Flags:	fO2	path	=	QFM
Liquid	mass	=	8.51	(gm)	density	=	2.3	(gm/cc)	viscosity	=	3.45	(log	10	poise)	(analysis	in	wt	%)
	G	=	-140149	(J)	H	=	-109757	(J)	S	=	23.87	(J/K)	V	=	3.7	(cc)	Cp	=	12.24	(J/K)
	SiO2	TiO2	Al2O3	Fe2O3	Cr2O3	FeO	MnO	MgO	NiO	CoO	CaO	Na2O	K2O	P2O5	H2O	CO2	SO3	Cl2O-1	F2O-1
	57.51	0.94	17.9	1.09	0	4.68	0.32	2.25	0	0	5.07	5.39	0.96	0	3.88	0	0	0	0
olivine	mass	=	14.97	(gm)	density	=	3.44	(gm/cc)	(analysis	in	mole	%)
	(Ca0.00Mg0.72Fe''0.27Mn0.01Co0.00Ni0.00)2SiO4
	G	=	-213142	(J)	H	=	-170894	(J)	S	=	33.18	(J/K)	V	=	4.35	(cc)	Cp	=	17.54	(J/K)
	tephroite	fayalite	co-olivine	ni-olivine	monticellite	forsterite
	0.91	27.31	0	0	0.64	71.14
orthopyroxene	mass	=	25.32	(gm)	density	=	3.31	(gm/cc)	(analysis	in	mole	%)
	opx	Na0.00Ca0.06Fe''0.46Mg1.41Fe'''0.02Ti0.01Al0.10Si1.93O6
	G	=	-386289	(J)	H	=	-314190	(J)	S	=	56.63	(J/K)	V	=	7.64	(cc)	Cp	=	30.88	(J/K)
	diopside	clinoenstatit	hedenbergite	alumino-buffo	buffonite	essenite	jadeite
	-46.71	93.66	46.33	4.68	-3.61	5.49	0.15
clinopyroxene	mass	=	2.35	(gm)	density	=	3.3	(gm/cc)	(analysis	in	mole	%)
	cpx	Na0.02Ca0.84Fe''0.20Mg0.77Fe'''0.06Ti0.07Al0.27Si1.78O6
	G	=	-36605.5	(J)	H	=	-30112.6	(J)	S	=	5.1	(J/K)	V	=	0.71	(cc)	Cp	=	2.71	(J/K)
	diopside	clinoenstatit	hedenbergite	alumino-buffo	buffonite	essenite	jadeite
	41.31	14.18	20.02	16.76	-2.88	8.53	2.09
clinopyroxene	mass	=	0.27	(gm)	density	=	3.46	(gm/cc)	(analysis	in	mole	%)
	cpx	Na0.02Ca0.93Fe''0.15Mg0.50Fe'''0.08Ti0.34Al0.70Si1.28O6
	G	=	-4085.3	(J)	H	=	-3370.48	(J)	S	=	0.56	(J/K)	V	=	0.08	(cc)	Cp	=	0.3	(J/K)
	diopside	clinoenstatit	hedenbergite	alumino-buffo	buffonite	essenite	jadeite
	5.65	5.01	15.47	64.25	4.27	3.34	2.01
feldspar	mass	=	48.43	(gm)	density	=	2.66	(gm/cc)	(analysis	in	mole	%)
	K0.00Na0.31Ca0.68Al1.68Si2.32O8
	G	=	-818660	(J)	H	=	-677723	(J)	S	=	110.7	(J/K)	V	=	18.18	(cc)	Cp	=	58.79	(J/K)
	albite	anorthite	sanidine
	31.28	68.38	0.34
water	mass	=	0.17	(gm)	density	=	0.18	(gm/cc)
	H2O
	G	=	-4148.48	(J)	H	=	-1967.45	(J)	S	=	1.71	(J/K)	V	=	0.97	(cc)	Cp	=	0.53	(J/K)
Total	solids	mass	=	91.5	(gm)	density	=	2.87	(gm/cc)
	G	=	-1.46293e+06	(J)	H	=	-1.19826e+06	(J)	S	=	207.89	(J/K)	V	=	31.92	(cc)	Cp	=	110.75	(J/K)
Viscosity	of	the	System	cannot	be	computed.
System	mass	=	100.01	(gm)	density	=	2.81	(gm/cc)
	G	=	-1.60308e+06	(J)	H	=	-1.30801e+06	(J)	S	=	231.76	(J/K)	V	=	35.62	(cc)	Cp	=	123	(J/K)
Oxygen	delta	moles	=	-0.0026883	delta	grams	=	-0.0860225
	G	=	775.84	(J)	H	=	-87.01	(J)	S	=	-0.68	(J/K)	V	=	-284.57	(cc)	Cp	=	-0.1	(J/K)
**********----------**********
Title:	Dummy	Title
T	=	990	(C)	P	=	1	(kbars)	log(10)	f	O2	=	-10.97	delta	HM	=	-5.57	NNO	=	-0.6	QFM	=	0	COH	=	1.93	IW	=	3.8
Constraint	Flags:	fO2	path	=	QFM
Liquid	mass	=	4.27	(gm)	density	=	2.29	(gm/cc)	viscosity	=	3.59	(log	10	poise)	(analysis	in	wt	%)
	G	=	-70271.3	(J)	H	=	-55207.5	(J)	S	=	11.93	(J/K)	V	=	1.86	(cc)	Cp	=	6.11	(J/K)
	SiO2	TiO2	Al2O3	Fe2O3	Cr2O3	FeO	MnO	MgO	NiO	CoO	CaO	Na2O	K2O	P2O5	H2O	CO2	SO3	Cl2O-1	F2O-1
	58.21	0.88	17.88	1.01	0	4.2	0.34	2.01	0	0	4.66	5.44	1.46	0	3.9	0	0	0	0
olivine	mass	=	14.35	(gm)	density	=	3.45	(gm/cc)	(analysis	in	mole	%)
	(Ca0.00Mg0.71Fe''0.28Mn0.01Co0.00Ni0.00)2SiO4
	G	=	-203095	(J)	H	=	-163105	(J)	S	=	31.66	(J/K)	V	=	4.16	(cc)	Cp	=	16.76	(J/K)
	tephroite	fayalite	co-olivine	ni-olivine	monticellite	forsterite
	1.06	27.9	0	0	0.62	70.42
orthopyroxene	mass	=	26.99	(gm)	density	=	3.32	(gm/cc)	(analysis	in	mole	%)
	opx	Na0.00Ca0.06Fe''0.47Mg1.40Fe'''0.02Ti0.00Al0.10Si1.94O6
	G	=	-410367	(J)	H	=	-334477	(J)	S	=	60.08	(J/K)	V	=	8.13	(cc)	Cp	=	32.86	(J/K)
	diopside	clinoenstatit	hedenbergite	alumino-buffo	buffonite	essenite	jadeite
	-47.46	93.7	47.25	4.52	-3.53	5.36	0.16
clinopyroxene	mass	=	2.12	(gm)	density	=	3.3	(gm/cc)	(analysis	in	mole	%)
	cpx	Na0.02Ca0.84Fe''0.20Mg0.76Fe'''0.06Ti0.07Al0.27Si1.78O6
	G	=	-33007	(J)	H	=	-27214.4	(J)	S	=	4.59	(J/K)	V	=	0.64	(cc)	Cp	=	2.44	(J/K)
	diopside	clinoenstatit	hedenbergite	alumino-buffo	buffonite	essenite	jadeite
	41.83	13.88	20.17	16.35	-2.75	8.34	2.19
clinopyroxene	mass	=	0.68	(gm)	density	=	3.47	(gm/cc)	(analysis	in	mole	%)
	cpx	Na0.02Ca0.93Fe''0.16Mg0.49Fe'''0.08Ti0.35Al0.70Si1.28O6
	G	=	-10435.4	(J)	H	=	-8628.93	(J)	S	=	1.43	(J/K)	V	=	0.2	(cc)	Cp	=	0.76	(J/K)
	diopside	clinoenstatit	hedenbergite	alumino-buffo	buffonite	essenite	jadeite
	5.24	4.8	15.64	64.67	4.43	3.12	2.11
feldspar	mass	=	51.26	(gm)	density	=	2.66	(gm/cc)	(analysis	in	mole	%)
	K0.01Na0.33Ca0.66Al1.66Si2.34O8
	G	=	-865401	(J)	H	=	-717733	(J)	S	=	116.9	(J/K)	V	=	19.27	(cc)	Cp	=	62.21	(J/K)
	albite	anorthite	sanidine
	33.39	66.07	0.54
water	mass	=	0.33	(gm)	density	=	0.18	(gm/cc)
	H2O
	G	=	-8128.85	(J)	H	=	-3881.54	(J)	S	=	3.36	(J/K)	V	=	1.88	(cc)	Cp	=	1.04	(J/K)
Total	solids	mass	=	95.74	(gm)	density	=	2.79	(gm/cc)
	G	=	-1.53043e+06	(J)	H	=	-1.25504e+06	(J)	S	=	218.02	(J/K)	V	=	34.28	(cc)	Cp	=	116.07	(J/K)
Viscosity	of	the	System	cannot	be	computed.
System	mass	=	100.01	(gm)	density	=	2.77	(gm/cc)
	G	=	-1.60071e+06	(J)	H	=	-1.31025e+06	(J)	S	=	229.95	(J/K)	V	=	36.15	(cc)	Cp	=	122.18	(J/K)
Oxygen	delta	moles	=	-0.00280694	delta	grams	=	-0.0898186
	G	=	803.01	(J)	H	=	-89.84	(J)	S	=	-0.71	(J/K)	V	=	-294.79	(cc)	Cp	=	-0.1	(J/K)
**********----------**********
Title:	Dummy	Title
T	=	980	(C)	P	=	1	(kbars)	log(10)	f	O2	=	-11.13	delta	HM	=	-5.58	NNO	=	-0.59	QFM	=	0	COH	=	1.92	IW	=	3.82
Constraint	Flags:	fO2	path	=	QFM
Liquid	mass	=	1.67	(gm)	density	=	2.28	(gm/cc)	viscosity	=	3.77	(log	10	poise)	(analysis	in	wt	%)
	G	=	-27487.7	(J)	H	=	-21678.1	(J)	S	=	4.64	(J/K)	V	=	0.73	(cc)	Cp	=	2.38	(J/K)
	SiO2	TiO2	Al2O3	Fe2O3	Cr2O3	FeO	MnO	MgO	NiO	CoO	CaO	Na2O	K2O	P2O5	H2O	CO2	SO3	Cl2O-1	F2O-1
	58.85	0.85	18.04	0.9	0	3.63	0.34	1.81	0	0	4.3	5.23	2.17	0	3.88	0	0	0	0
olivine	mass	=	14	(gm)	density	=	3.46	(gm/cc)	(analysis	in	mole	%)
	(Ca0.00Mg0.71Fe''0.28Mn0.01Co0.00Ni0.00)2SiO4
	G	=	-197351	(J)	H	=	-158818	(J)	S	=	30.75	(J/K)	V	=	4.05	(cc)	Cp	=	16.31	(J/K)
	tephroite	fayalite	co-olivine	ni-olivine	monticellite	forsterite
	1.16	28.22	0	0	0.59	70.03
orthopyroxene	mass	=	27.9	(gm)	density	=	3.32	(gm/cc)	(analysis	in	mole	%)
	opx	Na0.00Ca0.06Fe''0.48Mg1.40Fe'''0.02Ti0.00Al0.10Si1.94O6
	G	=	-423030	(J)	H	=	-345577	(J)	S	=	61.81	(J/K)	V	=	8.4	(cc)	Cp	=	33.91	(J/K)
	diopside	clinoenstatit	hedenbergite	alumino-buffo	buffonite	essenite	jadeite
	-47.93	93.77	47.8	4.42	-3.48	5.26	0.16
clinopyroxene	mass	=	2.01	(gm)	density	=	3.3	(gm/cc)	(analysis	in	mole	%)
	cpx	Na0.02Ca0.84Fe''0.20Mg0.76Fe'''0.05Ti0.07Al0.26Si1.79O6
	G	=	-31289.7	(J)	H	=	-25859.8	(J)	S	=	4.33	(J/K)	V	=	0.61	(cc)	Cp	=	2.32	(J/K)
	diopside	clinoenstatit	hedenbergite	alumino-buffo	buffonite	essenite	jadeite
	42.58	13.57	20.16	15.97	-2.74	8.21	2.24
clinopyroxene	mass	=	0.91	(gm)	density	=	3.47	(gm/cc)	(analysis	in	mole	%)
	cpx	Na0.02Ca0.93Fe''0.16Mg0.49Fe'''0.07Ti0.35Al0.70Si1.27O6
	G	=	-13980.2	(J)	H	=	-11587.2	(J)	S	=	1.91	(J/K)	V	=	0.26	(cc)	Cp	=	1.02	(J/K)
	diopside	clinoenstatit	hedenbergite	alumino-buffo	buffonite	essenite	jadeite
	4.86	4.59	15.67	65.3	4.48	2.94	2.15
feldspar	mass	=	53.08	(gm)	density	=	2.66	(gm/cc)	(analysis	in	mole	%)
	K0.01Na0.35Ca0.65Al1.65Si2.35O8
	G	=	-894664	(J)	H	=	-743457	(J)	S	=	120.66	(J/K)	V	=	19.97	(cc)	Cp	=	64.36	(J/K)
	albite	anorthite	sanidine
	34.61	64.59	0.81
water	mass	=	0.44	(gm)	density	=	0.18	(gm/cc)
	H2O
	G	=	-10568.4	(J)	H	=	-5081	(J)	S	=	4.38	(J/K)	V	=	2.42	(cc)	Cp	=	1.37	(J/K)
Total	solids	mass	=	98.34	(gm)	density	=	2.75	(gm/cc)
	G	=	-1.57088e+06	(J)	H	=	-1.29038e+06	(J)	S	=	223.84	(J/K)	V	=	35.72	(cc)	Cp	=	119.28	(J/K)
Viscosity	of	the	System	cannot	be	computed.
System	mass	=	100.01	(gm)	density	=	2.74	(gm/cc)
	G	=	-1.59837e+06	(J)	H	=	-1.31206e+06	(J)	S	=	228.47	(J/K)	V	=	36.45	(cc)	Cp	=	121.66	(J/K)
Oxygen	delta	moles	=	-0.00288515	delta	grams	=	-0.0923214
	G	=	818.12	(J)	H	=	-91.31	(J)	S	=	-0.73	(J/K)	V	=	-300.61	(cc)	Cp	=	-0.1	(J/K)
**********----------**********
Title:	Dummy	Title
T	=	970	(C)	P	=	1	(kbars)	log(10)	f	O2	=	-11.28	delta	HM	=	-5.58	NNO	=	-0.59	QFM	=	0	COH	=	1.9	IW	=	3.83
Constraint	Flags:	fO2	path	=	QFM
Liquid	mass	=	0.21	(gm)	density	=	2.27	(gm/cc)	viscosity	=	3.97	(log	10	poise)	(analysis	in	wt	%)
	G	=	-3412.97	(J)	H	=	-2702.93	(J)	S	=	0.57	(J/K)	V	=	0.09	(cc)	Cp	=	0.29	(J/K)
	SiO2	TiO2	Al2O3	Fe2O3	Cr2O3	FeO	MnO	MgO	NiO	CoO	CaO	Na2O	K2O	P2O5	H2O	CO2	SO3	Cl2O-1	F2O-1
	59.39	0.83	18.33	0.77	0	3.07	0.33	1.62	0	0	3.98	4.85	3.02	0	3.81	0	0	0	0
olivine	mass	=	13.79	(gm)	density	=	3.46	(gm/cc)	(analysis	in	mole	%)
	(Ca0.00Mg0.70Fe''0.28Mn0.01Co0.00Ni0.00)2SiO4
	G	=	-193786	(J)	H	=	-156313	(J)	S	=	30.14	(J/K)	V	=	3.98	(cc)	Cp	=	16.03	(J/K)
	tephroite	fayalite	co-olivine	ni-olivine	monticellite	forsterite
	1.22	28.36	0	0	0.57	69.85
orthopyroxene	mass	=	28.39	(gm)	density	=	3.32	(gm/cc)	(analysis	in	mole	%)
	opx	Na0.00Ca0.06Fe''0.48Mg1.40Fe'''0.02Ti0.00Al0.10Si1.94O6
	G	=	-429612	(J)	H	=	-351778	(J)	S	=	62.61	(J/K)	V	=	8.54	(cc)	Cp	=	34.47	(J/K)
	diopside	clinoenstatit	hedenbergite	alumino-buffo	buffonite	essenite	jadeite
	-48.22	93.86	48.12	4.35	-3.46	5.19	0.16
clinopyroxene	mass	=	1.94	(gm)	density	=	3.3	(gm/cc)	(analysis	in	mole	%)
	cpx	Na0.02Ca0.84Fe''0.20Mg0.76Fe'''0.05Ti0.06Al0.26Si1.79O6
	G	=	-30169.2	(J)	H	=	-24994.3	(J)	S	=	4.16	(J/K)	V	=	0.59	(cc)	Cp	=	2.24	(J/K)
	diopside	clinoenstatit	hedenbergite	alumino-buffo	buffonite	essenite	jadeite
	43.45	13.27	20.05	15.63	-2.8	8.14	2.26
clinopyroxene	mass	=	1.04	(gm)	density	=	3.47	(gm/cc)	(analysis	in	mole	%)
	cpx	Na0.02Ca0.93Fe''0.16Mg0.49Fe'''0.07Ti0.35Al0.71Si1.27O6
	G	=	-15980.2	(J)	H	=	-13276.8	(J)	S	=	2.17	(J/K)	V	=	0.3	(cc)	Cp	=	1.16	(J/K)
	diopside	clinoenstatit	hedenbergite	alumino-buffo	buffonite	essenite	jadeite
	4.5	4.38	15.63	66.07	4.46	2.8	2.16
feldspar	mass	=	54.14	(gm)	density	=	2.66	(gm/cc)	(analysis	in	mole	%)
	K0.01Na0.35Ca0.64Al1.64Si2.36O8
	G	=	-911209	(J)	H	=	-758762	(J)	S	=	122.63	(J/K)	V	=	20.38	(cc)	Cp	=	65.58	(J/K)
	albite	anorthite	sanidine
	35.17	63.72	1.11
water	mass	=	0.49	(gm)	density	=	0.18	(gm/cc)
	H2O
	G	=	-11896.6	(J)	H	=	-5758.79	(J)	S	=	4.94	(J/K)	V	=	2.71	(cc)	Cp	=	1.55	(J/K)
Total	solids	mass	=	99.8	(gm)	density	=	2.73	(gm/cc)
	G	=	-1.59265e+06	(J)	H	=	-1.31088e+06	(J)	S	=	226.66	(J/K)	V	=	36.5	(cc)	Cp	=	121.02	(J/K)
Viscosity	of	the	System	cannot	be	computed.
System	mass	=	100	(gm)	density	=	2.73	(gm/cc)
	G	=	-1.59607e+06	(J)	H	=	-1.31359e+06	(J)	S	=	227.23	(J/K)	V	=	36.59	(cc)	Cp	=	121.32	(J/K)
Oxygen	delta	moles	=	-0.00293343	delta	grams	=	-0.0938663
	G	=	824.44	(J)	H	=	-91.79	(J)	S	=	-0.74	(J/K)	V	=	-303.2	(cc)	Cp	=	-0.1	(J/K)
**********----------**********
Title:	Dummy	Title
T	=	960	(C)	P	=	1	(kbars)	log(10)	f	O2	=	-11.44	delta	HM	=	-5.58	NNO	=	-0.59	QFM	=	0	COH	=	1.89	IW	=	3.85
Constraint	Flags:	fO2	path	=	QFM
olivine	mass	=	13.77	(gm)	density	=	3.46	(gm/cc)	(analysis	in	mole	%)
	(Ca0.00Mg0.70Fe''0.28Mn0.01Co0.00Ni0.00)2SiO4
	G	=	-193163	(J)	H	=	-156211	(J)	S	=	29.96	(J/K)	V	=	3.98	(cc)	Cp	=	15.99	(J/K)
	tephroite	fayalite	co-olivine	ni-olivine	monticellite	forsterite
	1.22	28.37	0	0	0.54	69.86
orthopyroxene	mass	=	28.42	(gm)	density	=	3.32	(gm/cc)	(analysis	in	mole	%)
	opx	Na0.00Ca0.06Fe''0.48Mg1.40Fe'''0.02Ti0.00Al0.10Si1.94O6
	G	=	-429314	(J)	H	=	-352383	(J)	S	=	62.39	(J/K)	V	=	8.55	(cc)	Cp	=	34.46	(J/K)
	diopside	clinoenstatit	hedenbergite	alumino-buffo	buffonite	essenite	jadeite
	-48.4	93.98	48.27	4.32	-3.47	5.15	0.16
clinopyroxene	mass	=	1.95	(gm)	density	=	3.3	(gm/cc)	(analysis	in	mole	%)
	cpx	Na0.02Ca0.85Fe''0.20Mg0.77Fe'''0.05Ti0.06Al0.26Si1.79O6
	G	=	-30199.8	(J)	H	=	-25081.1	(J)	S	=	4.15	(J/K)	V	=	0.59	(cc)	Cp	=	2.24	(J/K)
	diopside	clinoenstatit	hedenbergite	alumino-buffo	buffonite	essenite	jadeite
	44.39	12.96	19.86	15.33	-2.93	8.11	2.27
clinopyroxene	mass	=	1.07	(gm)	density	=	3.48	(gm/cc)	(analysis	in	mole	%)
	cpx	Na0.02Ca0.94Fe''0.16Mg0.48Fe'''0.07Ti0.36Al0.72Si1.26O6
	G	=	-16453.6	(J)	H	=	-13703.4	(J)	S	=	2.23	(J/K)	V	=	0.31	(cc)	Cp	=	1.2	(J/K)
	diopside	clinoenstatit	hedenbergite	alumino-buffo	buffonite	essenite	jadeite
	4.14	4.18	15.53	66.93	4.38	2.69	2.15
feldspar	mass	=	54.3	(gm)	density	=	2.66	(gm/cc)	(analysis	in	mole	%)
	K0.01Na0.35Ca0.64Al1.64Si2.36O8
	G	=	-912618	(J)	H	=	-761596	(J)	S	=	122.47	(J/K)	V	=	20.44	(cc)	Cp	=	65.69	(J/K)
	albite	anorthite	sanidine
	35.22	63.6	1.17
water	mass	=	0.5	(gm)	density	=	0.18	(gm/cc)
	H2O
	G	=	-12037.2	(J)	H	=	-5866.9	(J)	S	=	5	(J/K)	V	=	2.72	(cc)	Cp	=	1.58	(J/K)
Total	solids	mass	=	100	(gm)	density	=	2.73	(gm/cc)
	G	=	-1.59379e+06	(J)	H	=	-1.31484e+06	(J)	S	=	226.2	(J/K)	V	=	36.58	(cc)	Cp	=	121.16	(J/K)
Viscosity	of	the	System	cannot	be	computed.
System	mass	=	100	(gm)	density	=	2.73	(gm/cc)
	G	=	-1.59379e+06	(J)	H	=	-1.31484e+06	(J)	S	=	226.2	(J/K)	V	=	36.58	(cc)	Cp	=	121.16	(J/K)
Oxygen	delta	moles	=	-0.00295761	delta	grams	=	-0.0946399
	G	=	823.81	(J)	H	=	-91.49	(J)	S	=	-0.74	(J/K)	V	=	-303.24	(cc)	Cp	=	-0.11	(J/K)
**********----------**********
Title:	Dummy	Title
T	=	950	(C)	P	=	1	(kbars)	log(10)	f	O2	=	-11.6	delta	HM	=	-5.59	NNO	=	-0.58	QFM	=	0	COH	=	1.87	IW	=	3.87
Constraint	Flags:	fO2	path	=	QFM
olivine	mass	=	13.78	(gm)	density	=	3.46	(gm/cc)	(analysis	in	mole	%)
	(Ca0.00Mg0.70Fe''0.28Mn0.01Co0.00Ni0.00)2SiO4
	G	=	-193087	(J)	H	=	-156557	(J)	S	=	29.87	(J/K)	V	=	3.98	(cc)	Cp	=	15.98	(J/K)
	tephroite	fayalite	co-olivine	ni-olivine	monticellite	forsterite
	1.22	28.36	0	0	0.52	69.91
orthopyroxene	mass	=	28.37	(gm)	density	=	3.33	(gm/cc)	(analysis	in	mole	%)
	opx	Na0.00Ca0.06Fe''0.48Mg1.40Fe'''0.02Ti0.00Al0.10Si1.94O6
	G	=	-427819	(J)	H	=	-352005	(J)	S	=	61.98	(J/K)	V	=	8.53	(cc)	Cp	=	34.36	(J/K)
	diopside	clinoenstatit	hedenbergite	alumino-buffo	buffonite	essenite	jadeite
	-48.57	94.1	48.4	4.29	-3.49	5.11	0.16
clinopyroxene	mass	=	1.97	(gm)	density	=	3.3	(gm/cc)	(analysis	in	mole	%)
	cpx	Na0.02Ca0.85Fe''0.20Mg0.77Fe'''0.05Ti0.06Al0.25Si1.80O6
	G	=	-30479.5	(J)	H	=	-25375.5	(J)	S	=	4.17	(J/K)	V	=	0.6	(cc)	Cp	=	2.26	(J/K)
	diopside	clinoenstatit	hedenbergite	alumino-buffo	buffonite	essenite	jadeite
	45.32	12.67	19.67	15.02	-3.07	8.1	2.28
clinopyroxene	mass	=	1.09	(gm)	density	=	3.48	(gm/cc)	(analysis	in	mole	%)
	cpx	Na0.02Ca0.94Fe''0.15Mg0.48Fe'''0.07Ti0.36Al0.73Si1.25O6
	G	=	-16678.1	(J)	H	=	-13924.2	(J)	S	=	2.25	(J/K)	V	=	0.31	(cc)	Cp	=	1.21	(J/K)
	diopside	clinoenstatit	hedenbergite	alumino-buffo	buffonite	essenite	jadeite
	3.75	3.97	15.41	67.85	4.29	2.58	2.14
feldspar	mass	=	54.3	(gm)	density	=	2.66	(gm/cc)	(analysis	in	mole	%)
	K0.01Na0.35Ca0.64Al1.64Si2.36O8
	G	=	-911466	(J)	H	=	-762311	(J)	S	=	121.94	(J/K)	V	=	20.43	(cc)	Cp	=	65.62	(J/K)
	albite	anorthite	sanidine
	35.22	63.61	1.17
water	mass	=	0.5	(gm)	density	=	0.19	(gm/cc)
	H2O
	G	=	-11987.2	(J)	H	=	-5882.76	(J)	S	=	4.99	(J/K)	V	=	2.69	(cc)	Cp	=	1.59	(J/K)
Total	solids	mass	=	100	(gm)	density	=	2.74	(gm/cc)
	G	=	-1.59152e+06	(J)	H	=	-1.31606e+06	(J)	S	=	225.21	(J/K)	V	=	36.53	(cc)	Cp	=	121.03	(J/K)
Viscosity	of	the	System	cannot	be	computed.
System	mass	=	100	(gm)	density	=	2.74	(gm/cc)
	G	=	-1.59152e+06	(J)	H	=	-1.31606e+06	(J)	S	=	225.21	(J/K)	V	=	36.53	(cc)	Cp	=	121.03	(J/K)
Oxygen	delta	moles	=	-0.00297835	delta	grams	=	-0.0953037
	G	=	822.11	(J)	H	=	-91.06	(J)	S	=	-0.75	(J/K)	V	=	-302.89	(cc)	Cp	=	-0.11	(J/K)
**********----------**********
Title:	Dummy	Title
T	=	940	(C)	P	=	1	(kbars)	log(10)	f	O2	=	-11.77	delta	HM	=	-5.59	NNO	=	-0.58	QFM	=	0	COH	=	1.86	IW	=	3.88
Constraint	Flags:	fO2	path	=	QFM
olivine	mass	=	13.79	(gm)	density	=	3.47	(gm/cc)	(analysis	in	mole	%)
	(Ca0.00Mg0.70Fe''0.28Mn0.01Co0.00Ni0.00)2SiO4
	G	=	-193001	(J)	H	=	-156893	(J)	S	=	29.76	(J/K)	V	=	3.98	(cc)	Cp	=	15.98	(J/K)
	tephroite	fayalite	co-olivine	ni-olivine	monticellite	forsterite
	1.22	28.34	0	0	0.49	69.95
orthopyroxene	mass	=	28.31	(gm)	density	=	3.33	(gm/cc)	(analysis	in	mole	%)
	opx	Na0.00Ca0.06Fe''0.49Mg1.40Fe'''0.02Ti0.00Al0.09Si1.94O6
	G	=	-426329	(J)	H	=	-351624	(J)	S	=	61.58	(J/K)	V	=	8.51	(cc)	Cp	=	34.26	(J/K)
	diopside	clinoenstatit	hedenbergite	alumino-buffo	buffonite	essenite	jadeite
	-48.74	94.22	48.53	4.26	-3.5	5.08	0.15
clinopyroxene	mass	=	1.99	(gm)	density	=	3.3	(gm/cc)	(analysis	in	mole	%)
	cpx	Na0.02Ca0.85Fe''0.19Mg0.77Fe'''0.05Ti0.06Al0.25Si1.80O6
	G	=	-30807.4	(J)	H	=	-25711.2	(J)	S	=	4.2	(J/K)	V	=	0.6	(cc)	Cp	=	2.28	(J/K)
	diopside	clinoenstatit	hedenbergite	alumino-buffo	buffonite	essenite	jadeite
	46.26	12.37	19.47	14.74	-3.2	8.08	2.28
clinopyroxene	mass	=	1.1	(gm)	density	=	3.48	(gm/cc)	(analysis	in	mole	%)
	cpx	Na0.02Ca0.94Fe''0.15Mg0.47Fe'''0.07Ti0.36Al0.73Si1.25O6
	G	=	-16879.4	(J)	H	=	-14126.5	(J)	S	=	2.27	(J/K)	V	=	0.32	(cc)	Cp	=	1.23	(J/K)
	diopside	clinoenstatit	hedenbergite	alumino-buffo	buffonite	essenite	jadeite
	3.41	3.79	15.3	68.7	4.2	2.48	2.13
feldspar	mass	=	54.3	(gm)	density	=	2.66	(gm/cc)	(analysis	in	mole	%)
	K0.01Na0.35Ca0.64Al1.64Si2.36O8
	G	=	-910304	(J)	H	=	-763014	(J)	S	=	121.41	(J/K)	V	=	20.43	(cc)	Cp	=	65.55	(J/K)
	albite	anorthite	sanidine
	35.22	63.61	1.17
water	mass	=	0.5	(gm)	density	=	0.19	(gm/cc)
	H2O
	G	=	-11937.4	(J)	H	=	-5898.69	(J)	S	=	4.98	(J/K)	V	=	2.65	(cc)	Cp	=	1.6	(J/K)
Total	solids	mass	=	100	(gm)	density	=	2.74	(gm/cc)
	G	=	-1.58926e+06	(J)	H	=	-1.31727e+06	(J)	S	=	224.2	(J/K)	V	=	36.49	(cc)	Cp	=	120.89	(J/K)
Viscosity	of	the	System	cannot	be	computed.
System	mass	=	100	(gm)	density	=	2.74	(gm/cc)
	G	=	-1.58926e+06	(J)	H	=	-1.31727e+06	(J)	S	=	224.2	(J/K)	V	=	36.49	(cc)	Cp	=	120.89	(J/K)
Oxygen	delta	moles	=	-0.00299856	delta	grams	=	-0.0959505
	G	=	820.18	(J)	H	=	-90.61	(J)	S	=	-0.75	(J/K)	V	=	-302.45	(cc)	Cp	=	-0.11	(J/K)
**********----------**********
Title:	Dummy	Title
T	=	930	(C)	P	=	1	(kbars)	log(10)	f	O2	=	-11.93	delta	HM	=	-5.59	NNO	=	-0.57	QFM	=	0	COH	=	1.85	IW	=	3.9
Constraint	Flags:	fO2	path	=	QFM
olivine	mass	=	13.81	(gm)	density	=	3.47	(gm/cc)	(analysis	in	mole	%)
	(Ca0.00Mg0.70Fe''0.28Mn0.01Co0.00Ni0.00)2SiO4
	G	=	-192909	(J)	H	=	-157224	(J)	S	=	29.66	(J/K)	V	=	3.98	(cc)	Cp	=	15.98	(J/K)
	tephroite	fayalite	co-olivine	ni-olivine	monticellite	forsterite
	1.22	28.32	0	0	0.47	69.99
orthopyroxene	mass	=	28.26	(gm)	density	=	3.33	(gm/cc)	(analysis	in	mole	%)
	opx	Na0.00Ca0.06Fe''0.49Mg1.40Fe'''0.02Ti0.00Al0.09Si1.94O6
	G	=	-424855	(J)	H	=	-351250	(J)	S	=	61.18	(J/K)	V	=	8.49	(cc)	Cp	=	34.16	(J/K)
	diopside	clinoenstatit	hedenbergite	alumino-buffo	buffonite	essenite	jadeite
	-48.93	94.34	48.66	4.24	-3.52	5.05	0.15
clinopyroxene	mass	=	2.01	(gm)	density	=	3.3	(gm/cc)	(analysis	in	mole	%)
	cpx	Na0.02Ca0.86Fe''0.19Mg0.77Fe'''0.05Ti0.06Al0.25Si1.81O6
	G	=	-31161	(J)	H	=	-26069.6	(J)	S	=	4.23	(J/K)	V	=	0.61	(cc)	Cp	=	2.31	(J/K)
	diopside	clinoenstatit	hedenbergite	alumino-buffo	buffonite	essenite	jadeite
	47.18	12.08	19.26	14.46	-3.33	8.07	2.29
clinopyroxene	mass	=	1.12	(gm)	density	=	3.48	(gm/cc)	(analysis	in	mole	%)
	cpx	Na0.02Ca0.94Fe''0.15Mg0.47Fe'''0.06Ti0.37Al0.74Si1.24O6
	G	=	-17061.8	(J)	H	=	-14313.5	(J)	S	=	2.28	(J/K)	V	=	0.32	(cc)	Cp	=	1.24	(J/K)
	diopside	clinoenstatit	hedenbergite	alumino-buffo	buffonite	essenite	jadeite
	3.06	3.61	15.2	69.54	4.1	2.39	2.11
feldspar	mass	=	54.31	(gm)	density	=	2.66	(gm/cc)	(analysis	in	mole	%)
	K0.01Na0.35Ca0.64Al1.64Si2.36O8
	G	=	-909137	(J)	H	=	-763706	(J)	S	=	120.87	(J/K)	V	=	20.43	(cc)	Cp	=	65.48	(J/K)
	albite	anorthite	sanidine
	35.22	63.61	1.17
water	mass	=	0.5	(gm)	density	=	0.19	(gm/cc)
	H2O
	G	=	-11887.7	(J)	H	=	-5914.71	(J)	S	=	4.96	(J/K)	V	=	2.62	(cc)	Cp	=	1.61	(J/K)
Total	solids	mass	=	100	(gm)	density	=	2.74	(gm/cc)
	G	=	-1.58701e+06	(J)	H	=	-1.31848e+06	(J)	S	=	223.19	(J/K)	V	=	36.45	(cc)	Cp	=	120.76	(J/K)
Viscosity	of	the	System	cannot	be	computed.
System	mass	=	100	(gm)	density	=	2.74	(gm/cc)
	G	=	-1.58701e+06	(J)	H	=	-1.31848e+06	(J)	S	=	223.19	(J/K)	V	=	36.45	(cc)	Cp	=	120.76	(J/K)
Oxygen	delta	moles	=	-0.0030184	delta	grams	=	-0.0965851
	G	=	818.05	(J)	H	=	-90.13	(J)	S	=	-0.75	(J/K)	V	=	-301.94	(cc)	Cp	=	-0.11	(J/K)
**********----------**********
Title:	Dummy	Title
T	=	920	(C)	P	=	1	(kbars)	log(10)	f	O2	=	-12.1	delta	HM	=	-5.6	NNO	=	-0.57	QFM	=	0	COH	=	1.83	IW	=	3.92
Constraint	Flags:	fO2	path	=	QFM
olivine	mass	=	13.82	(gm)	density	=	3.47	(gm/cc)	(analysis	in	mole	%)
	(Ca0.00Mg0.70Fe''0.28Mn0.01Co0.00Ni0.00)2SiO4
	G	=	-192811	(J)	H	=	-157550	(J)	S	=	29.55	(J/K)	V	=	3.99	(cc)	Cp	=	15.97	(J/K)
	tephroite	fayalite	co-olivine	ni-olivine	monticellite	forsterite
	1.22	28.31	0	0	0.44	70.03
orthopyroxene	mass	=	28.21	(gm)	density	=	3.33	(gm/cc)	(analysis	in	mole	%)
	opx	Na0.00Ca0.05Fe''0.49Mg1.40Fe'''0.01Ti0.00Al0.09Si1.94O6
	G	=	-423400	(J)	H	=	-350885	(J)	S	=	60.78	(J/K)	V	=	8.47	(cc)	Cp	=	34.05	(J/K)
	diopside	clinoenstatit	hedenbergite	alumino-buffo	buffonite	essenite	jadeite
	-49.11	94.47	48.8	4.22	-3.54	5.02	0.15
clinopyroxene	mass	=	2.04	(gm)	density	=	3.3	(gm/cc)	(analysis	in	mole	%)
	cpx	Na0.02Ca0.86Fe''0.19Mg0.77Fe'''0.05Ti0.05Al0.25Si1.81O6
	G	=	-31524.5	(J)	H	=	-26437.7	(J)	S	=	4.26	(J/K)	V	=	0.62	(cc)	Cp	=	2.33	(J/K)
	diopside	clinoenstatit	hedenbergite	alumino-buffo	buffonite	essenite	jadeite
	48.08	11.79	19.05	14.19	-3.46	8.05	2.3
clinopyroxene	mass	=	1.13	(gm)	density	=	3.49	(gm/cc)	(analysis	in	mole	%)
	cpx	Na0.02Ca0.94Fe''0.15Mg0.47Fe'''0.06Ti0.37Al0.75Si1.23O6
	G	=	-17231.7	(J)	H	=	-14490.6	(J)	S	=	2.3	(J/K)	V	=	0.32	(cc)	Cp	=	1.25	(J/K)
	diopside	clinoenstatit	hedenbergite	alumino-buffo	buffonite	essenite	jadeite
	2.72	3.44	15.1	70.35	4	2.29	2.1
feldspar	mass	=	54.31	(gm)	density	=	2.66	(gm/cc)	(analysis	in	mole	%)
	K0.01Na0.35Ca0.64Al1.64Si2.36O8
	G	=	-907968	(J)	H	=	-764393	(J)	S	=	120.33	(J/K)	V	=	20.42	(cc)	Cp	=	65.4	(J/K)
	albite	anorthite	sanidine
	35.22	63.61	1.17
water	mass	=	0.5	(gm)	density	=	0.19	(gm/cc)
	H2O
	G	=	-11838.1	(J)	H	=	-5930.81	(J)	S	=	4.95	(J/K)	V	=	2.59	(cc)	Cp	=	1.61	(J/K)
Total	solids	mass	=	100	(gm)	density	=	2.75	(gm/cc)
	G	=	-1.58477e+06	(J)	H	=	-1.31969e+06	(J)	S	=	222.17	(J/K)	V	=	36.4	(cc)	Cp	=	120.63	(J/K)
Viscosity	of	the	System	cannot	be	computed.
System	mass	=	100	(gm)	density	=	2.75	(gm/cc)
	G	=	-1.58477e+06	(J)	H	=	-1.31969e+06	(J)	S	=	222.17	(J/K)	V	=	36.4	(cc)	Cp	=	120.63	(J/K)
Oxygen	delta	moles	=	-0.00303786	delta	grams	=	-0.0972078
	G	=	815.73	(J)	H	=	-89.63	(J)	S	=	-0.76	(J/K)	V	=	-301.36	(cc)	Cp	=	-0.11	(J/K)
**********----------**********
Title:	Dummy	Title
T	=	910	(C)	P	=	1	(kbars)	log(10)	f	O2	=	-12.28	delta	HM	=	-5.6	NNO	=	-0.56	QFM	=	0	COH	=	1.81	IW	=	3.93
Constraint	Flags:	fO2	path	=	QFM
olivine	mass	=	13.83	(gm)	density	=	3.47	(gm/cc)	(analysis	in	mole	%)
	(Ca0.00Mg0.70Fe''0.28Mn0.01Co0.00Ni0.00)2SiO4
	G	=	-192709	(J)	H	=	-157873	(J)	S	=	29.44	(J/K)	V	=	3.99	(cc)	Cp	=	15.97	(J/K)
	tephroite	fayalite	co-olivine	ni-olivine	monticellite	forsterite
	1.22	28.29	0	0	0.42	70.08
orthopyroxene	mass	=	28.16	(gm)	density	=	3.33	(gm/cc)	(analysis	in	mole	%)
	opx	Na0.00Ca0.05Fe''0.49Mg1.40Fe'''0.01Ti0.00Al0.09Si1.94O6
	G	=	-421961	(J)	H	=	-350527	(J)	S	=	60.38	(J/K)	V	=	8.45	(cc)	Cp	=	33.95	(J/K)
	diopside	clinoenstatit	hedenbergite	alumino-buffo	buffonite	essenite	jadeite
	-49.3	94.59	48.93	4.2	-3.55	4.99	0.15
clinopyroxene	mass	=	2.06	(gm)	density	=	3.3	(gm/cc)	(analysis	in	mole	%)
	cpx	Na0.02Ca0.86Fe''0.19Mg0.77Fe'''0.04Ti0.05Al0.24Si1.82O6
	G	=	-31898.8	(J)	H	=	-26816.1	(J)	S	=	4.3	(J/K)	V	=	0.63	(cc)	Cp	=	2.36	(J/K)
	diopside	clinoenstatit	hedenbergite	alumino-buffo	buffonite	essenite	jadeite
	48.98	11.5	18.84	13.92	-3.58	8.04	2.31
clinopyroxene	mass	=	1.14	(gm)	density	=	3.49	(gm/cc)	(analysis	in	mole	%)
	cpx	Na0.02Ca0.95Fe''0.15Mg0.46Fe'''0.06Ti0.38Al0.75Si1.23O6
	G	=	-17390	(J)	H	=	-14658.6	(J)	S	=	2.31	(J/K)	V	=	0.33	(cc)	Cp	=	1.26	(J/K)
	diopside	clinoenstatit	hedenbergite	alumino-buffo	buffonite	essenite	jadeite
	2.39	3.28	15	71.15	3.9	2.2	2.08
feldspar	mass	=	54.31	(gm)	density	=	2.66	(gm/cc)	(analysis	in	mole	%)
	K0.01Na0.35Ca0.64Al1.64Si2.36O8
	G	=	-906800	(J)	H	=	-765073	(J)	S	=	119.79	(J/K)	V	=	20.42	(cc)	Cp	=	65.33	(J/K)
	albite	anorthite	sanidine
	35.21	63.61	1.17
water	mass	=	0.5	(gm)	density	=	0.2	(gm/cc)
	H2O
	G	=	-11788.6	(J)	H	=	-5947.01	(J)	S	=	4.94	(J/K)	V	=	2.55	(cc)	Cp	=	1.62	(J/K)
Total	solids	mass	=	100	(gm)	density	=	2.75	(gm/cc)
	G	=	-1.58255e+06	(J)	H	=	-1.32089e+06	(J)	S	=	221.15	(J/K)	V	=	36.36	(cc)	Cp	=	120.5	(J/K)
Viscosity	of	the	System	cannot	be	computed.
System	mass	=	100	(gm)	density	=	2.75	(gm/cc)
	G	=	-1.58255e+06	(J)	H	=	-1.32089e+06	(J)	S	=	221.15	(J/K)	V	=	36.36	(cc)	Cp	=	120.5	(J/K)
Oxygen	delta	moles	=	-0.00305696	delta	grams	=	-0.0978192
	G	=	813.23	(J)	H	=	-89.11	(J)	S	=	-0.76	(J/K)	V	=	-300.72	(cc)	Cp	=	-0.11	(J/K)
**********----------**********
Title:	Dummy	Title
T	=	900	(C)	P	=	1	(kbars)	log(10)	f	O2	=	-12.45	delta	HM	=	-5.6	NNO	=	-0.56	QFM	=	0	COH	=	1.8	IW	=	3.95
Constraint	Flags:	fO2	path	=	QFM
olivine	mass	=	13.84	(gm)	density	=	3.47	(gm/cc)	(analysis	in	mole	%)
	(Ca0.00Mg0.71Fe''0.28Mn0.01Co0.00Ni0.00)2SiO4
	G	=	-192604	(J)	H	=	-158193	(J)	S	=	29.33	(J/K)	V	=	3.99	(cc)	Cp	=	15.96	(J/K)
	tephroite	fayalite	co-olivine	ni-olivine	monticellite	forsterite
	1.22	28.27	0	0	0.4	70.12
orthopyroxene	mass	=	28.11	(gm)	density	=	3.33	(gm/cc)	(analysis	in	mole	%)
	opx	Na0.00Ca0.05Fe''0.49Mg1.40Fe'''0.01Ti0.00Al0.09Si1.94O6
	G	=	-420534	(J)	H	=	-350174	(J)	S	=	59.98	(J/K)	V	=	8.43	(cc)	Cp	=	33.85	(J/K)
	diopside	clinoenstatit	hedenbergite	alumino-buffo	buffonite	essenite	jadeite
	-49.49	94.72	49.06	4.18	-3.57	4.96	0.15
clinopyroxene	mass	=	2.09	(gm)	density	=	3.3	(gm/cc)	(analysis	in	mole	%)
	cpx	Na0.02Ca0.86Fe''0.19Mg0.77Fe'''0.04Ti0.05Al0.24Si1.82O6
	G	=	-32277	(J)	H	=	-27199.2	(J)	S	=	4.33	(J/K)	V	=	0.63	(cc)	Cp	=	2.39	(J/K)
	diopside	clinoenstatit	hedenbergite	alumino-buffo	buffonite	essenite	jadeite
	49.85	11.22	18.63	13.66	-3.71	8.02	2.32
clinopyroxene	mass	=	1.15	(gm)	density	=	3.49	(gm/cc)	(analysis	in	mole	%)
	cpx	Na0.02Ca0.95Fe''0.15Mg0.46Fe'''0.06Ti0.38Al0.76Si1.22O6
	G	=	-17541.3	(J)	H	=	-14821.2	(J)	S	=	2.32	(J/K)	V	=	0.33	(cc)	Cp	=	1.27	(J/K)
	diopside	clinoenstatit	hedenbergite	alumino-buffo	buffonite	essenite	jadeite
	2.05	3.12	14.9	71.94	3.81	2.11	2.07
feldspar	mass	=	54.31	(gm)	density	=	2.66	(gm/cc)	(analysis	in	mole	%)
	K0.01Na0.35Ca0.64Al1.64Si2.36O8
	G	=	-905634	(J)	H	=	-765751	(J)	S	=	119.24	(J/K)	V	=	20.41	(cc)	Cp	=	65.25	(J/K)
	albite	anorthite	sanidine
	35.21	63.62	1.17
water	mass	=	0.5	(gm)	density	=	0.2	(gm/cc)
	H2O
	G	=	-11739.3	(J)	H	=	-5963.3	(J)	S	=	4.92	(J/K)	V	=	2.52	(cc)	Cp	=	1.63	(J/K)
Total	solids	mass	=	100	(gm)	density	=	2.75	(gm/cc)
	G	=	-1.58033e+06	(J)	H	=	-1.3221e+06	(J)	S	=	220.12	(J/K)	V	=	36.31	(cc)	Cp	=	120.36	(J/K)
Viscosity	of	the	System	cannot	be	computed.
System	mass	=	100	(gm)	density	=	2.75	(gm/cc)
	G	=	-1.58033e+06	(J)	H	=	-1.3221e+06	(J)	S	=	220.12	(J/K)	V	=	36.31	(cc)	Cp	=	120.36	(J/K)
Oxygen	delta	moles	=	-0.00307575	delta	grams	=	-0.0984203
	G	=	810.56	(J)	H	=	-88.56	(J)	S	=	-0.77	(J/K)	V	=	-300.01	(cc)	Cp	=	-0.11	(J/K)
**********----------**********
Title:	Dummy	Title
T	=	890	(C)	P	=	1	(kbars)	log(10)	f	O2	=	-12.63	delta	HM	=	-5.61	NNO	=	-0.56	QFM	=	0	COH	=	1.78	IW	=	3.97
Constraint	Flags:	fO2	path	=	QFM
olivine	mass	=	13.86	(gm)	density	=	3.47	(gm/cc)	(analysis	in	mole	%)
	(Ca0.00Mg0.71Fe''0.28Mn0.01Co0.00Ni0.00)2SiO4
	G	=	-192514	(J)	H	=	-158524	(J)	S	=	29.22	(J/K)	V	=	3.99	(cc)	Cp	=	15.95	(J/K)
	tephroite	fayalite	co-olivine	ni-olivine	monticellite	forsterite
	1.22	28.25	0	0	0.37	70.17
orthopyroxene	mass	=	28.05	(gm)	density	=	3.34	(gm/cc)	(analysis	in	mole	%)
	opx	Na0.00Ca0.05Fe''0.49Mg1.40Fe'''0.01Ti0.00Al0.09Si1.95O6
	G	=	-419106	(J)	H	=	-349814	(J)	S	=	59.57	(J/K)	V	=	8.41	(cc)	Cp	=	33.75	(J/K)
	diopside	clinoenstatit	hedenbergite	alumino-buffo	buffonite	essenite	jadeite
	-49.67	94.84	49.2	4.15	-3.58	4.93	0.14
clinopyroxene	mass	=	2.11	(gm)	density	=	3.3	(gm/cc)	(analysis	in	mole	%)
	cpx	Na0.02Ca0.87Fe''0.18Mg0.77Fe'''0.04Ti0.05Al0.24Si1.82O6
	G	=	-32609.9	(J)	H	=	-27545	(J)	S	=	4.35	(J/K)	V	=	0.64	(cc)	Cp	=	2.41	(J/K)
	diopside	clinoenstatit	hedenbergite	alumino-buffo	buffonite	essenite	jadeite
	50.68	10.97	18.44	13.39	-3.81	8	2.32
clinopyroxene	mass	=	1.16	(gm)	density	=	3.49	(gm/cc)	(analysis	in	mole	%)
	cpx	Na0.02Ca0.95Fe''0.15Mg0.46Fe'''0.06Ti0.38Al0.77Si1.21O6
	G	=	-17698.9	(J)	H	=	-14989.7	(J)	S	=	2.33	(J/K)	V	=	0.33	(cc)	Cp	=	1.29	(J/K)
	diopside	clinoenstatit	hedenbergite	alumino-buffo	buffonite	essenite	jadeite
	1.68	2.95	14.8	72.77	3.72	2.01	2.06
feldspar	mass	=	54.32	(gm)	density	=	2.66	(gm/cc)	(analysis	in	mole	%)
	K0.01Na0.35Ca0.64Al1.64Si2.36O8
	G	=	-904505	(J)	H	=	-766455	(J)	S	=	118.69	(J/K)	V	=	20.41	(cc)	Cp	=	65.18	(J/K)
	albite	anorthite	sanidine
	35.21	63.62	1.17
water	mass	=	0.5	(gm)	density	=	0.2	(gm/cc)
	H2O
	G	=	-11690.2	(J)	H	=	-5979.7	(J)	S	=	4.91	(J/K)	V	=	2.49	(cc)	Cp	=	1.65	(J/K)
Total	solids	mass	=	100	(gm)	density	=	2.76	(gm/cc)
	G	=	-1.57812e+06	(J)	H	=	-1.32331e+06	(J)	S	=	219.08	(J/K)	V	=	36.27	(cc)	Cp	=	120.23	(J/K)
Viscosity	of	the	System	cannot	be	computed.
System	mass	=	100	(gm)	density	=	2.76	(gm/cc)
	G	=	-1.57812e+06	(J)	H	=	-1.32331e+06	(J)	S	=	219.08	(J/K)	V	=	36.27	(cc)	Cp	=	120.23	(J/K)
Oxygen	delta	moles	=	-0.00309443	delta	grams	=	-0.0990181
	G	=	807.78	(J)	H	=	-88	(J)	S	=	-0.77	(J/K)	V	=	-299.26	(cc)	Cp	=	-0.11	(J/K)
**********----------**********
Title:	Dummy	Title
T	=	880	(C)	P	=	1	(kbars)	log(10)	f	O2	=	-12.81	delta	HM	=	-5.61	NNO	=	-0.55	QFM	=	0	COH	=	1.77	IW	=	3.99
Constraint	Flags:
olivine	mass	=	13.86	(gm)	density	=	3.47	(gm/cc)	(analysis	in	mole	%)
	(Ca0.00Mg0.71Fe''0.28Mn0.01Co0.00Ni0.00)2SiO4
	G	=	-192368	(J)	H	=	-158809	(J)	S	=	29.1	(J/K)	V	=	3.99	(cc)	Cp	=	15.94	(J/K)
	tephroite	fayalite	co-olivine	ni-olivine	monticellite	forsterite
	1.21	28.22	0	0	0.36	70.21
orthopyroxene	mass	=	28.01	(gm)	density	=	3.34	(gm/cc)	(analysis	in	mole	%)
	opx	Na0.00Ca0.05Fe''0.49Mg1.40Fe'''0.01Ti0.00Al0.09Si1.95O6
	G	=	-417813	(J)	H	=	-349560	(J)	S	=	59.19	(J/K)	V	=	8.39	(cc)	Cp	=	33.66	(J/K)
	diopside	clinoenstatit	hedenbergite	alumino-buffo	buffonite	essenite	jadeite
	-49.89	94.95	49.33	4.15	-3.6	4.9	0.14
clinopyroxene	mass	=	2.14	(gm)	density	=	3.29	(gm/cc)	(analysis	in	mole	%)
	cpx	Na0.02Ca0.87Fe''0.18Mg0.78Fe'''0.04Ti0.05Al0.24Si1.83O6
	G	=	-33054.5	(J)	H	=	-27987.2	(J)	S	=	4.39	(J/K)	V	=	0.65	(cc)	Cp	=	2.45	(J/K)
	diopside	clinoenstatit	hedenbergite	alumino-buffo	buffonite	essenite	jadeite
	51.5	10.68	18.19	13.22	-3.94	8	2.34
clinopyroxene	mass	=	1.17	(gm)	density	=	3.5	(gm/cc)	(analysis	in	mole	%)
	cpx	Na0.02Ca0.95Fe''0.15Mg0.46Fe'''0.06Ti0.38Al0.77Si1.21O6
	G	=	-17779.1	(J)	H	=	-15092.4	(J)	S	=	2.33	(J/K)	V	=	0.33	(cc)	Cp	=	1.29	(J/K)
	diopside	clinoenstatit	hedenbergite	alumino-buffo	buffonite	essenite	jadeite
	1.48	2.86	14.73	73.3	3.62	1.96	2.04
feldspar	mass	=	54.31	(gm)	density	=	2.66	(gm/cc)	(analysis	in	mole	%)
	K0.01Na0.35Ca0.64Al1.64Si2.36O8
	G	=	-903273	(J)	H	=	-767065	(J)	S	=	118.12	(J/K)	V	=	20.4	(cc)	Cp	=	65.1	(J/K)
	albite	anorthite	sanidine
	35.21	63.62	1.17
water	mass	=	0.5	(gm)	density	=	0.2	(gm/cc)
	H2O
	G	=	-11641.1	(J)	H	=	-5996.21	(J)	S	=	4.9	(J/K)	V	=	2.45	(cc)	Cp	=	1.66	(J/K)
Total	solids	mass	=	100	(gm)	density	=	2.76	(gm/cc)
	G	=	-1.57593e+06	(J)	H	=	-1.32451e+06	(J)	S	=	218.03	(J/K)	V	=	36.22	(cc)	Cp	=	120.1	(J/K)
Viscosity	of	the	System	cannot	be	computed.
System	mass	=	100	(gm)	density	=	2.76	(gm/cc)
	G	=	-1.57593e+06	(J)	H	=	-1.32451e+06	(J)	S	=	218.03	(J/K)	V	=	36.22	(cc)	Cp	=	120.1	(J/K)
**********----------**********
Title:	Dummy	Title
T	=	870	(C)	P	=	1	(kbars)	log(10)	f	O2	=	-12.95	delta	HM	=	-5.57	NNO	=	-0.5	QFM	=	0.04	COH	=	1.79	IW	=	4.05
Constraint	Flags:
olivine	mass	=	13.86	(gm)	density	=	3.47	(gm/cc)	(analysis	in	mole	%)
	(Ca0.00Mg0.71Fe''0.28Mn0.01Co0.00Ni0.00)2SiO4
	G	=	-192016	(J)	H	=	-158926	(J)	S	=	28.95	(J/K)	V	=	3.99	(cc)	Cp	=	15.91	(J/K)
	tephroite	fayalite	co-olivine	ni-olivine	monticellite	forsterite
	1.22	28.18	0	0	0.34	70.27
orthopyroxene	mass	=	27.98	(gm)	density	=	3.34	(gm/cc)	(analysis	in	mole	%)
	opx	Na0.00Ca0.05Fe''0.49Mg1.40Fe'''0.01Ti0.00Al0.09Si1.95O6
	G	=	-416674	(J)	H	=	-349425	(J)	S	=	58.83	(J/K)	V	=	8.38	(cc)	Cp	=	33.58	(J/K)
	diopside	clinoenstatit	hedenbergite	alumino-buffo	buffonite	essenite	jadeite
	-50.12	95.09	49.45	4.14	-3.62	4.92	0.14
clinopyroxene	mass	=	2.18	(gm)	density	=	3.29	(gm/cc)	(analysis	in	mole	%)
	cpx	Na0.02Ca0.87Fe''0.18Mg0.77Fe'''0.04Ti0.04Al0.23Si1.83O6
	G	=	-33690.1	(J)	H	=	-28591.4	(J)	S	=	4.46	(J/K)	V	=	0.66	(cc)	Cp	=	2.49	(J/K)
	diopside	clinoenstatit	hedenbergite	alumino-buffo	buffonite	essenite	jadeite
	52.2	10.39	17.97	13.01	-4.01	8.07	2.37
clinopyroxene	mass	=	1.17	(gm)	density	=	3.5	(gm/cc)	(analysis	in	mole	%)
	cpx	Na0.02Ca0.95Fe''0.15Mg0.45Fe'''0.06Ti0.39Al0.78Si1.21O6
	G	=	-17855.7	(J)	H	=	-15191.5	(J)	S	=	2.33	(J/K)	V	=	0.34	(cc)	Cp	=	1.3	(J/K)
	diopside	clinoenstatit	hedenbergite	alumino-buffo	buffonite	essenite	jadeite
	1.21	2.73	14.66	73.82	3.6	1.95	2.03
feldspar	mass	=	54.3	(gm)	density	=	2.66	(gm/cc)	(analysis	in	mole	%)
	K0.01Na0.35Ca0.64Al1.64Si2.36O8
	G	=	-901925	(J)	H	=	-767572	(J)	S	=	117.53	(J/K)	V	=	20.4	(cc)	Cp	=	65.01	(J/K)
	albite	anorthite	sanidine
	35.21	63.61	1.17
water	mass	=	0.5	(gm)	density	=	0.21	(gm/cc)
	H2O
	G	=	-11592.3	(J)	H	=	-6012.84	(J)	S	=	4.88	(J/K)	V	=	2.42	(cc)	Cp	=	1.67	(J/K)
Total	solids	mass	=	100	(gm)	density	=	2.76	(gm/cc)
	G	=	-1.57375e+06	(J)	H	=	-1.32572e+06	(J)	S	=	216.98	(J/K)	V	=	36.18	(cc)	Cp	=	119.96	(J/K)
Viscosity	of	the	System	cannot	be	computed.
System	mass	=	100	(gm)	density	=	2.76	(gm/cc)
	G	=	-1.57375e+06	(J)	H	=	-1.32572e+06	(J)	S	=	216.98	(J/K)	V	=	36.18	(cc)	Cp	=	119.96	(J/K)
**********----------**********
Title:	Dummy	Title
T	=	860	(C)	P	=	1	(kbars)	log(10)	f	O2	=	-13.1	delta	HM	=	-5.53	NNO	=	-0.46	QFM	=	0.08	COH	=	1.82	IW	=	4.11
Constraint	Flags:
olivine	mass	=	13.76	(gm)	density	=	3.48	(gm/cc)	(analysis	in	mole	%)
	(Ca0.00Mg0.71Fe''0.28Mn0.01Co0.00Ni0.00)2SiO4
	G	=	-190460	(J)	H	=	-158033	(J)	S	=	28.62	(J/K)	V	=	3.96	(cc)	Cp	=	15.79	(J/K)
	tephroite	fayalite	co-olivine	ni-olivine	monticellite	forsterite
	1.22	28.18	0	0	0.32	70.28
orthopyroxene	mass	=	28.02	(gm)	density	=	3.34	(gm/cc)	(analysis	in	mole	%)
	opx	Na0.00Ca0.05Fe''0.50Mg1.40Fe'''0.01Ti0.00Al0.09Si1.95O6
	G	=	-416473	(J)	H	=	-350067	(J)	S	=	58.6	(J/K)	V	=	8.39	(cc)	Cp	=	33.58	(J/K)
	diopside	clinoenstatit	hedenbergite	alumino-buffo	buffonite	essenite	jadeite
	-50.42	95.22	49.63	4.14	-3.64	4.93	0.14
clinopyroxene	mass	=	2.22	(gm)	density	=	3.29	(gm/cc)	(analysis	in	mole	%)
	cpx	Na0.02Ca0.87Fe''0.18Mg0.77Fe'''0.04Ti0.04Al0.23Si1.83O6
	G	=	-34301.1	(J)	H	=	-29176.9	(J)	S	=	4.52	(J/K)	V	=	0.68	(cc)	Cp	=	2.54	(J/K)
	diopside	clinoenstatit	hedenbergite	alumino-buffo	buffonite	essenite	jadeite
	52.87	10.11	17.77	12.8	-4.08	8.13	2.4
clinopyroxene	mass	=	1.18	(gm)	density	=	3.5	(gm/cc)	(analysis	in	mole	%)
	cpx	Na0.02Ca0.95Fe''0.15Mg0.45Fe'''0.06Ti0.39Al0.78Si1.20O6
	G	=	-17933.3	(J)	H	=	-15291.8	(J)	S	=	2.33	(J/K)	V	=	0.34	(cc)	Cp	=	1.3	(J/K)
	diopside	clinoenstatit	hedenbergite	alumino-buffo	buffonite	essenite	jadeite
	0.93	2.61	14.59	74.33	3.57	1.94	2.03
biotite	mass	=	0.07	(gm)	density	=	2.72	(gm/cc)	(analysis	in	mole	%)
	K(Fe''0.01Mg0.99)3AlSi3O10(OH)2
	G	=	-1195.25	(J)	H	=	-1007.03	(J)	S	=	0.17	(J/K)	V	=	0.03	(cc)	Cp	=	0.09	(J/K)
	annite	phlogopite
	0.52	99.48
feldspar	mass	=	54.24	(gm)	density	=	2.66	(gm/cc)	(analysis	in	mole	%)
	K0.01Na0.35Ca0.64Al1.64Si2.36O8
	G	=	-899755	(J)	H	=	-767381	(J)	S	=	116.82	(J/K)	V	=	20.37	(cc)	Cp	=	64.86	(J/K)
	albite	anorthite	sanidine
	35.25	63.66	1.09
water	mass	=	0.5	(gm)	density	=	0.21	(gm/cc)
	H2O
	G	=	-11471.1	(J)	H	=	-5991.79	(J)	S	=	4.84	(J/K)	V	=	2.37	(cc)	Cp	=	1.67	(J/K)
Total	solids	mass	=	100	(gm)	density	=	2.77	(gm/cc)
	G	=	-1.57159e+06	(J)	H	=	-1.32695e+06	(J)	S	=	215.9	(J/K)	V	=	36.12	(cc)	Cp	=	119.83	(J/K)
Viscosity	of	the	System	cannot	be	computed.
System	mass	=	100	(gm)	density	=	2.77	(gm/cc)
	G	=	-1.57159e+06	(J)	H	=	-1.32695e+06	(J)	S	=	215.9	(J/K)	V	=	36.12	(cc)	Cp	=	119.83	(J/K)
**********----------**********
Title:	Dummy	Title
T	=	850	(C)	P	=	1	(kbars)	log(10)	f	O2	=	-13.25	delta	HM	=	-5.5	NNO	=	-0.41	QFM	=	0.12	COH	=	1.84	IW	=	4.17
Constraint	Flags:
olivine	mass	=	13.63	(gm)	density	=	3.48	(gm/cc)	(analysis	in	mole	%)
	(Ca0.00Mg0.71Fe''0.28Mn0.01Co0.00Ni0.00)2SiO4
	G	=	-188230	(J)	H	=	-156567	(J)	S	=	28.19	(J/K)	V	=	3.92	(cc)	Cp	=	15.6	(J/K)
	tephroite	fayalite	co-olivine	ni-olivine	monticellite	forsterite
	1.24	28.2	0	0	0.3	70.26
orthopyroxene	mass	=	28.09	(gm)	density	=	3.34	(gm/cc)	(analysis	in	mole	%)
	opx	Na0.00Ca0.05Fe''0.50Mg1.40Fe'''0.01Ti0.00Al0.09Si1.95O6
	G	=	-416801	(J)	H	=	-351150	(J)	S	=	58.45	(J/K)	V	=	8.4	(cc)	Cp	=	33.62	(J/K)
	diopside	clinoenstatit	hedenbergite	alumino-buffo	buffonite	essenite	jadeite
	-50.75	95.35	49.85	4.13	-3.66	4.94	0.14
clinopyroxene	mass	=	2.26	(gm)	density	=	3.29	(gm/cc)	(analysis	in	mole	%)
	cpx	Na0.02Ca0.88Fe''0.18Mg0.77Fe'''0.04Ti0.04Al0.23Si1.83O6
	G	=	-34901.4	(J)	H	=	-29755.4	(J)	S	=	4.58	(J/K)	V	=	0.69	(cc)	Cp	=	2.58	(J/K)
	diopside	clinoenstatit	hedenbergite	alumino-buffo	buffonite	essenite	jadeite
	53.52	9.84	17.58	12.59	-4.16	8.2	2.44
clinopyroxene	mass	=	1.19	(gm)	density	=	3.5	(gm/cc)	(analysis	in	mole	%)
	cpx	Na0.02Ca0.95Fe''0.15Mg0.45Fe'''0.05Ti0.39Al0.79Si1.20O6
	G	=	-18010.4	(J)	H	=	-15391.7	(J)	S	=	2.33	(J/K)	V	=	0.34	(cc)	Cp	=	1.31	(J/K)
	diopside	clinoenstatit	hedenbergite	alumino-buffo	buffonite	essenite	jadeite
	0.63	2.49	14.54	74.83	3.55	1.93	2.02
biotite	mass	=	0.19	(gm)	density	=	2.72	(gm/cc)	(analysis	in	mole	%)
	K(Fe''0.01Mg0.99)3AlSi3O10(OH)2
	G	=	-3058.89	(J)	H	=	-2583.19	(J)	S	=	0.42	(J/K)	V	=	0.07	(cc)	Cp	=	0.24	(J/K)
	annite	phlogopite
	0.51	99.49
feldspar	mass	=	54.15	(gm)	density	=	2.66	(gm/cc)	(analysis	in	mole	%)
	K0.01Na0.35Ca0.64Al1.64Si2.36O8
	G	=	-897124	(J)	H	=	-766793	(J)	S	=	116.04	(J/K)	V	=	20.33	(cc)	Cp	=	64.68	(J/K)
	albite	anorthite	sanidine
	35.3	63.74	0.95
water	mass	=	0.49	(gm)	density	=	0.21	(gm/cc)
	H2O
	G	=	-11310.2	(J)	H	=	-5949.32	(J)	S	=	4.77	(J/K)	V	=	2.31	(cc)	Cp	=	1.67	(J/K)
Total	solids	mass	=	100	(gm)	density	=	2.77	(gm/cc)
	G	=	-1.56944e+06	(J)	H	=	-1.32819e+06	(J)	S	=	214.79	(J/K)	V	=	36.05	(cc)	Cp	=	119.7	(J/K)
Viscosity	of	the	System	cannot	be	computed.
System	mass	=	100	(gm)	density	=	2.77	(gm/cc)
	G	=	-1.56944e+06	(J)	H	=	-1.32819e+06	(J)	S	=	214.79	(J/K)	V	=	36.05	(cc)	Cp	=	119.7	(J/K)
**********----------**********
Title:	Dummy	Title
T	=	840	(C)	P	=	1	(kbars)	log(10)	f	O2	=	-13.41	delta	HM	=	-5.46	NNO	=	-0.37	QFM	=	0.16	COH	=	1.86	IW	=	4.23
Constraint	Flags:
olivine	mass	=	13.5	(gm)	density	=	3.48	(gm/cc)	(analysis	in	mole	%)
	(Ca0.00Mg0.71Fe''0.28Mn0.01Co0.00Ni0.00)2SiO4
	G	=	-186225	(J)	H	=	-155282	(J)	S	=	27.8	(J/K)	V	=	3.88	(cc)	Cp	=	15.44	(J/K)
	tephroite	fayalite	co-olivine	ni-olivine	monticellite	forsterite
	1.25	28.22	0	0	0.28	70.25
orthopyroxene	mass	=	28.15	(gm)	density	=	3.35	(gm/cc)	(analysis	in	mole	%)
	opx	Na0.00Ca0.04Fe''0.50Mg1.40Fe'''0.01Ti0.00Al0.09Si1.95O6
	G	=	-416974	(J)	H	=	-352103	(J)	S	=	58.28	(J/K)	V	=	8.42	(cc)	Cp	=	33.65	(J/K)
	diopside	clinoenstatit	hedenbergite	alumino-buffo	buffonite	essenite	jadeite
	-51.07	95.47	50.06	4.12	-3.68	4.95	0.14
clinopyroxene	mass	=	2.31	(gm)	density	=	3.29	(gm/cc)	(analysis	in	mole	%)
	cpx	Na0.02Ca0.88Fe''0.17Mg0.77Fe'''0.04Ti0.04Al0.23Si1.84O6
	G	=	-35503	(J)	H	=	-30337.3	(J)	S	=	4.64	(J/K)	V	=	0.7	(cc)	Cp	=	2.63	(J/K)
	diopside	clinoenstatit	hedenbergite	alumino-buffo	buffonite	essenite	jadeite
	54.17	9.57	17.38	12.38	-4.23	8.26	2.47
clinopyroxene	mass	=	1.19	(gm)	density	=	3.51	(gm/cc)	(analysis	in	mole	%)
	cpx	Na0.02Ca0.96Fe''0.14Mg0.45Fe'''0.05Ti0.39Al0.79Si1.19O6
	G	=	-18085.6	(J)	H	=	-15490.3	(J)	S	=	2.33	(J/K)	V	=	0.34	(cc)	Cp	=	1.31	(J/K)
	diopside	clinoenstatit	hedenbergite	alumino-buffo	buffonite	essenite	jadeite
	0.35	2.37	14.49	75.33	3.52	1.92	2.02
biotite	mass	=	0.29	(gm)	density	=	2.72	(gm/cc)	(analysis	in	mole	%)
	K(Fe''0.00Mg1.00)3AlSi3O10(OH)2
	G	=	-4699.42	(J)	H	=	-3977.77	(J)	S	=	0.65	(J/K)	V	=	0.11	(cc)	Cp	=	0.37	(J/K)
	annite	phlogopite
	0.49	99.51
feldspar	mass	=	54.07	(gm)	density	=	2.66	(gm/cc)	(analysis	in	mole	%)
	K0.01Na0.35Ca0.64Al1.64Si2.36O8
	G	=	-894644	(J)	H	=	-766322	(J)	S	=	115.28	(J/K)	V	=	20.29	(cc)	Cp	=	64.51	(J/K)
	albite	anorthite	sanidine
	35.35	63.81	0.83
water	mass	=	0.49	(gm)	density	=	0.22	(gm/cc)
	H2O
	G	=	-11163.5	(J)	H	=	-5913.62	(J)	S	=	4.72	(J/K)	V	=	2.25	(cc)	Cp	=	1.67	(J/K)
Total	solids	mass	=	100	(gm)	density	=	2.78	(gm/cc)
	G	=	-1.56729e+06	(J)	H	=	-1.32943e+06	(J)	S	=	213.69	(J/K)	V	=	35.99	(cc)	Cp	=	119.57	(J/K)
Viscosity	of	the	System	cannot	be	computed.
System	mass	=	100	(gm)	density	=	2.78	(gm/cc)
	G	=	-1.56729e+06	(J)	H	=	-1.32943e+06	(J)	S	=	213.69	(J/K)	V	=	35.99	(cc)	Cp	=	119.57	(J/K)
**********----------**********
Title:	Dummy	Title
T	=	830	(C)	P	=	1	(kbars)	log(10)	f	O2	=	-13.56	delta	HM	=	-5.42	NNO	=	-0.32	QFM	=	0.21	COH	=	1.88	IW	=	4.29
Constraint	Flags:
olivine	mass	=	13.39	(gm)	density	=	3.48	(gm/cc)	(analysis	in	mole	%)
	(Ca0.00Mg0.71Fe''0.28Mn0.01Co0.00Ni0.00)2SiO4
	G	=	-184417	(J)	H	=	-154155	(J)	S	=	27.43	(J/K)	V	=	3.85	(cc)	Cp	=	15.29	(J/K)
	tephroite	fayalite	co-olivine	ni-olivine	monticellite	forsterite
	1.26	28.22	0	0	0.27	70.25
orthopyroxene	mass	=	28.21	(gm)	density	=	3.35	(gm/cc)	(analysis	in	mole	%)
	opx	Na0.00Ca0.04Fe''0.50Mg1.40Fe'''0.01Ti0.00Al0.09Si1.95O6
	G	=	-417011	(J)	H	=	-352943	(J)	S	=	58.08	(J/K)	V	=	8.43	(cc)	Cp	=	33.67	(J/K)
	diopside	clinoenstatit	hedenbergite	alumino-buffo	buffonite	essenite	jadeite
	-51.38	95.6	50.26	4.12	-3.7	4.97	0.14
clinopyroxene	mass	=	2.35	(gm)	density	=	3.29	(gm/cc)	(analysis	in	mole	%)
	cpx	Na0.03Ca0.88Fe''0.17Mg0.77Fe'''0.04Ti0.04Al0.23Si1.84O6
	G	=	-36104.7	(J)	H	=	-30921.5	(J)	S	=	4.7	(J/K)	V	=	0.71	(cc)	Cp	=	2.67	(J/K)
	diopside	clinoenstatit	hedenbergite	alumino-buffo	buffonite	essenite	jadeite
	54.81	9.31	17.17	12.18	-4.31	8.33	2.51
clinopyroxene	mass	=	1.2	(gm)	density	=	3.51	(gm/cc)	(analysis	in	mole	%)
	cpx	Na0.02Ca0.96Fe''0.14Mg0.44Fe'''0.05Ti0.40Al0.80Si1.19O6
	G	=	-18159.2	(J)	H	=	-15587.8	(J)	S	=	2.33	(J/K)	V	=	0.34	(cc)	Cp	=	1.32	(J/K)
	diopside	clinoenstatit	hedenbergite	alumino-buffo	buffonite	essenite	jadeite
	0.06	2.26	14.43	75.83	3.49	1.92	2.01
biotite	mass	=	0.38	(gm)	density	=	2.72	(gm/cc)	(analysis	in	mole	%)
	K(Fe''0.00Mg1.00)3AlSi3O10(OH)2
	G	=	-6142.39	(J)	H	=	-5211.14	(J)	S	=	0.84	(J/K)	V	=	0.14	(cc)	Cp	=	0.48	(J/K)
	annite	phlogopite
	0.48	99.52
feldspar	mass	=	53.99	(gm)	density	=	2.67	(gm/cc)	(analysis	in	mole	%)
	K0.01Na0.35Ca0.64Al1.64Si2.36O8
	G	=	-892298	(J)	H	=	-765954	(J)	S	=	114.53	(J/K)	V	=	20.26	(cc)	Cp	=	64.35	(J/K)
	albite	anorthite	sanidine
	35.4	63.88	0.73
water	mass	=	0.48	(gm)	density	=	0.22	(gm/cc)
	H2O
	G	=	-11029.4	(J)	H	=	-5883.96	(J)	S	=	4.66	(J/K)	V	=	2.2	(cc)	Cp	=	1.67	(J/K)
Total	solids	mass	=	100	(gm)	density	=	2.78	(gm/cc)
	G	=	-1.56516e+06	(J)	H	=	-1.33066e+06	(J)	S	=	212.58	(J/K)	V	=	35.92	(cc)	Cp	=	119.44	(J/K)
Viscosity	of	the	System	cannot	be	computed.
System	mass	=	100	(gm)	density	=	2.78	(gm/cc)
	G	=	-1.56516e+06	(J)	H	=	-1.33066e+06	(J)	S	=	212.58	(J/K)	V	=	35.92	(cc)	Cp	=	119.44	(J/K)
**********----------**********
Title:	Dummy	Title
T	=	820	(C)	P	=	1	(kbars)	log(10)	f	O2	=	-13.72	delta	HM	=	-5.38	NNO	=	-0.27	QFM	=	0.25	COH	=	1.91	IW	=	4.36
Constraint	Flags:
olivine	mass	=	13.29	(gm)	density	=	3.48	(gm/cc)	(analysis	in	mole	%)
	(Ca0.00Mg0.71Fe''0.28Mn0.01Co0.00Ni0.00)2SiO4
	G	=	-182786	(J)	H	=	-153170	(J)	S	=	27.09	(J/K)	V	=	3.82	(cc)	Cp	=	15.15	(J/K)
	tephroite	fayalite	co-olivine	ni-olivine	monticellite	forsterite
	1.27	28.22	0	0	0.25	70.27
orthopyroxene	mass	=	28.25	(gm)	density	=	3.35	(gm/cc)	(analysis	in	mole	%)
	opx	Na0.00Ca0.04Fe''0.50Mg1.40Fe'''0.01Ti0.00Al0.09Si1.95O6
	G	=	-416932	(J)	H	=	-353685	(J)	S	=	57.86	(J/K)	V	=	8.44	(cc)	Cp	=	33.67	(J/K)
	diopside	clinoenstatit	hedenbergite	alumino-buffo	buffonite	essenite	jadeite
	-51.69	95.73	50.45	4.11	-3.72	4.98	0.14
clinopyroxene	mass	=	2.39	(gm)	density	=	3.29	(gm/cc)	(analysis	in	mole	%)
	cpx	Na0.03Ca0.88Fe''0.17Mg0.77Fe'''0.04Ti0.04Al0.23Si1.84O6
	G	=	-36705.5	(J)	H	=	-31507.3	(J)	S	=	4.76	(J/K)	V	=	0.72	(cc)	Cp	=	2.71	(J/K)
	diopside	clinoenstatit	hedenbergite	alumino-buffo	buffonite	essenite	jadeite
	55.44	9.05	16.96	11.99	-4.39	8.39	2.55
clinopyroxene	mass	=	1.21	(gm)	density	=	3.51	(gm/cc)	(analysis	in	mole	%)
	cpx	Na0.02Ca0.96Fe''0.14Mg0.44Fe'''0.05Ti0.40Al0.80Si1.18O6
	G	=	-18231.3	(J)	H	=	-15684.1	(J)	S	=	2.33	(J/K)	V	=	0.34	(cc)	Cp	=	1.32	(J/K)
	diopside	clinoenstatit	hedenbergite	alumino-buffo	buffonite	essenite	jadeite
	-0.21	2.15	14.37	76.31	3.47	1.91	2
biotite	mass	=	0.45	(gm)	density	=	2.72	(gm/cc)	(analysis	in	mole	%)
	K(Fe''0.00Mg1.00)3AlSi3O10(OH)2
	G	=	-7410.27	(J)	H	=	-6301.25	(J)	S	=	1.01	(J/K)	V	=	0.17	(cc)	Cp	=	0.58	(J/K)
	annite	phlogopite
	0.46	99.54
feldspar	mass	=	53.92	(gm)	density	=	2.67	(gm/cc)	(analysis	in	mole	%)
	K0.01Na0.35Ca0.64Al1.64Si2.36O8
	G	=	-890071	(J)	H	=	-765676	(J)	S	=	113.79	(J/K)	V	=	20.22	(cc)	Cp	=	64.2	(J/K)
	albite	anorthite	sanidine
	35.44	63.93	0.63
water	mass	=	0.48	(gm)	density	=	0.22	(gm/cc)
	H2O
	G	=	-10906.5	(J)	H	=	-5859.7	(J)	S	=	4.62	(J/K)	V	=	2.15	(cc)	Cp	=	1.68	(J/K)
Total	solids	mass	=	100	(gm)	density	=	2.79	(gm/cc)
	G	=	-1.56304e+06	(J)	H	=	-1.33188e+06	(J)	S	=	211.46	(J/K)	V	=	35.86	(cc)	Cp	=	119.32	(J/K)
Viscosity	of	the	System	cannot	be	computed.
System	mass	=	100	(gm)	density	=	2.79	(gm/cc)
	G	=	-1.56304e+06	(J)	H	=	-1.33188e+06	(J)	S	=	211.46	(J/K)	V	=	35.86	(cc)	Cp	=	119.32	(J/K)
**********----------**********
Title:	Dummy	Title
T	=	810	(C)	P	=	1	(kbars)	log(10)	f	O2	=	-13.88	delta	HM	=	-5.34	NNO	=	-0.23	QFM	=	0.29	COH	=	1.94	IW	=	4.42
Constraint	Flags:
olivine	mass	=	13.21	(gm)	density	=	3.48	(gm/cc)	(analysis	in	mole	%)
	(Ca0.00Mg0.71Fe''0.28Mn0.01Co0.00Ni0.00)2SiO4
	G	=	-181310	(J)	H	=	-152311	(J)	S	=	26.77	(J/K)	V	=	3.79	(cc)	Cp	=	15.03	(J/K)
	tephroite	fayalite	co-olivine	ni-olivine	monticellite	forsterite
	1.28	28.2	0	0	0.24	70.29
orthopyroxene	mass	=	28.29	(gm)	density	=	3.35	(gm/cc)	(analysis	in	mole	%)
	opx	Na0.00Ca0.04Fe''0.51Mg1.40Fe'''0.01Ti0.00Al0.09Si1.95O6
	G	=	-416752	(J)	H	=	-354340	(J)	S	=	57.62	(J/K)	V	=	8.44	(cc)	Cp	=	33.67	(J/K)
	diopside	clinoenstatit	hedenbergite	alumino-buffo	buffonite	essenite	jadeite
	-52	95.85	50.64	4.11	-3.74	5	0.13
clinopyroxene	mass	=	2.43	(gm)	density	=	3.29	(gm/cc)	(analysis	in	mole	%)
	cpx	Na0.03Ca0.89Fe''0.17Mg0.77Fe'''0.04Ti0.04Al0.23Si1.84O6
	G	=	-37304.8	(J)	H	=	-32093.8	(J)	S	=	4.81	(J/K)	V	=	0.74	(cc)	Cp	=	2.76	(J/K)
	diopside	clinoenstatit	hedenbergite	alumino-buffo	buffonite	essenite	jadeite
	56.07	8.79	16.75	11.8	-4.46	8.46	2.59
clinopyroxene	mass	=	1.21	(gm)	density	=	3.51	(gm/cc)	(analysis	in	mole	%)
	cpx	Na0.02Ca0.96Fe''0.14Mg0.44Fe'''0.05Ti0.40Al0.81Si1.18O6
	G	=	-18301.7	(J)	H	=	-15779.3	(J)	S	=	2.33	(J/K)	V	=	0.35	(cc)	Cp	=	1.33	(J/K)
	diopside	clinoenstatit	hedenbergite	alumino-buffo	buffonite	essenite	jadeite
	-0.49	2.05	14.31	76.79	3.44	1.91	1.99
biotite	mass	=	0.52	(gm)	density	=	2.72	(gm/cc)	(analysis	in	mole	%)
	K(Fe''0.00Mg1.00)3AlSi3O10(OH)2
	G	=	-8522.85	(J)	H	=	-7263.93	(J)	S	=	1.16	(J/K)	V	=	0.19	(cc)	Cp	=	0.66	(J/K)
	annite	phlogopite
	0.44	99.56
feldspar	mass	=	53.86	(gm)	density	=	2.67	(gm/cc)	(analysis	in	mole	%)
	K0.01Na0.35Ca0.64Al1.64Si2.36O8
	G	=	-887949	(J)	H	=	-765477	(J)	S	=	113.07	(J/K)	V	=	20.2	(cc)	Cp	=	64.07	(J/K)
	albite	anorthite	sanidine

## Sheet: GPa 0.5
**********----------**********
T	=	1500	(C)	P	=	5	(kbars)	log(10)	f	O2	=	-5.18	delta	HM	=	-5.22	NNO	=	-0.48	QFM	=	0	COH	=	2.27	IW	=	3.48
Constraint	Flags:	fO2	path	=	QFM
Liquid	mass	=	100.09	(gm)	density	=	2.65	(gm/cc)	viscosity	=	1.03	(log	10	poise)	(analysis	in	wt	%)
	G	=	-1.72463e+06	(J)	H	=	-1.19228e+06	(J)	S	=	300.23	(J/K)	V	=	37.73	(cc)	Cp	=	155.43	(J/K)
	SiO2	TiO2	Al2O3	Fe2O3	Cr2O3	FeO	MnO	MgO	NiO	CoO	CaO	Na2O	K2O	P2O5	H2O	CO2	SO3	Cl2O-1	F2O-1
	49.95	0.22	17.52	1.14	0	7.41	0.15	12.6	0	0	8.21	2.19	0.11	0	0.5	0	0	0	0
Total	solids	mass	=	0	(gm)	density	=	0	(gm/cc)
	G	=	0	(J)	H	=	0	(J)	S	=	0	(J/K)	V	=	0	(cc)	Cp	=	0	(J/K)
Viscosity	of	the	System:	1.03	(log	10	poise)
System	mass	=	100.09	(gm)	density	=	2.65	(gm/cc)
	G	=	-1.72463e+06	(J)	H	=	-1.19228e+06	(J)	S	=	300.23	(J/K)	V	=	37.73	(cc)	Cp	=	155.43	(J/K)
Oxygen	delta	moles	=	-1.5439e-16	delta	grams	=	-4.94031e-15
	G	=	0	(J)	H	=	0	(J)	S	=	0	(J/K)	V	=	0	(cc)	Cp	=	0	(J/K)
**********----------**********
Title:	Dummy	Title
T	=	1490	(C)	P	=	5	(kbars)	log(10)	f	O2	=	-5.26	delta	HM	=	-5.22	NNO	=	-0.48	QFM	=	0	COH	=	2.26	IW	=	3.49
Constraint	Flags:	fO2	path	=	QFM
Liquid	mass	=	100.09	(gm)	density	=	2.66	(gm/cc)	viscosity	=	1.06	(log	10	poise)	(analysis	in	wt	%)
	G	=	-1.72163e+06	(J)	H	=	-1.19384e+06	(J)	S	=	299.35	(J/K)	V	=	37.7	(cc)	Cp	=	155.42	(J/K)
	SiO2	TiO2	Al2O3	Fe2O3	Cr2O3	FeO	MnO	MgO	NiO	CoO	CaO	Na2O	K2O	P2O5	H2O	CO2	SO3	Cl2O-1	F2O-1
	49.95	0.22	17.52	1.14	0	7.41	0.15	12.6	0	0	8.21	2.19	0.11	0	0.5	0	0	0	0
Total	solids	mass	=	0	(gm)	density	=	0	(gm/cc)
	G	=	0	(J)	H	=	0	(J)	S	=	0	(J/K)	V	=	0	(cc)	Cp	=	0	(J/K)
Viscosity	of	the	System:	1.06	(log	10	poise)
System	mass	=	100.09	(gm)	density	=	2.66	(gm/cc)
	G	=	-1.72163e+06	(J)	H	=	-1.19384e+06	(J)	S	=	299.35	(J/K)	V	=	37.7	(cc)	Cp	=	155.42	(J/K)
Oxygen	delta	moles	=	1.77887e-06	delta	grams	=	5.69217e-05
	G	=	-0.74	(J)	H	=	0.09	(J)	S	=	0	(J/K)	V	=	0.26	(cc)	Cp	=	0	(J/K)
**********----------**********
Title:	Dummy	Title
T	=	1480	(C)	P	=	5	(kbars)	log(10)	f	O2	=	-5.34	delta	HM	=	-5.22	NNO	=	-0.48	QFM	=	0	COH	=	2.26	IW	=	3.5
Constraint	Flags:	fO2	path	=	QFM
Liquid	mass	=	100.09	(gm)	density	=	2.66	(gm/cc)	viscosity	=	1.09	(log	10	poise)	(analysis	in	wt	%)
	G	=	-1.71865e+06	(J)	H	=	-1.19539e+06	(J)	S	=	298.47	(J/K)	V	=	37.67	(cc)	Cp	=	155.42	(J/K)
	SiO2	TiO2	Al2O3	Fe2O3	Cr2O3	FeO	MnO	MgO	NiO	CoO	CaO	Na2O	K2O	P2O5	H2O	CO2	SO3	Cl2O-1	F2O-1
	49.95	0.22	17.52	1.14	0	7.41	0.15	12.6	0	0	8.21	2.19	0.11	0	0.5	0	0	0	0
Total	solids	mass	=	0	(gm)	density	=	0	(gm/cc)
	G	=	0	(J)	H	=	0	(J)	S	=	0	(J/K)	V	=	0	(cc)	Cp	=	0	(J/K)
Viscosity	of	the	System:	1.09	(log	10	poise)
System	mass	=	100.09	(gm)	density	=	2.66	(gm/cc)
	G	=	-1.71865e+06	(J)	H	=	-1.19539e+06	(J)	S	=	298.47	(J/K)	V	=	37.67	(cc)	Cp	=	155.42	(J/K)
Oxygen	delta	moles	=	3.91948e-06	delta	grams	=	0.000125419
	G	=	-1.62	(J)	H	=	0.2	(J)	S	=	0	(J/K)	V	=	0.57	(cc)	Cp	=	0	(J/K)
**********----------**********
Title:	Dummy	Title
T	=	1470	(C)	P	=	5	(kbars)	log(10)	f	O2	=	-5.42	delta	HM	=	-5.22	NNO	=	-0.47	QFM	=	0	COH	=	2.25	IW	=	3.51
Constraint	Flags:	fO2	path	=	QFM
Liquid	mass	=	100.09	(gm)	density	=	2.66	(gm/cc)	viscosity	=	1.12	(log	10	poise)	(analysis	in	wt	%)
	G	=	-1.71567e+06	(J)	H	=	-1.19695e+06	(J)	S	=	297.58	(J/K)	V	=	37.64	(cc)	Cp	=	155.41	(J/K)
	SiO2	TiO2	Al2O3	Fe2O3	Cr2O3	FeO	MnO	MgO	NiO	CoO	CaO	Na2O	K2O	P2O5	H2O	CO2	SO3	Cl2O-1	F2O-1
	49.95	0.22	17.52	1.14	0	7.41	0.15	12.6	0	0	8.21	2.19	0.11	0	0.5	0	0	0	0
Total	solids	mass	=	0	(gm)	density	=	0	(gm/cc)
	G	=	0	(J)	H	=	0	(J)	S	=	0	(J/K)	V	=	0	(cc)	Cp	=	0	(J/K)
Viscosity	of	the	System:	1.12	(log	10	poise)
System	mass	=	100.09	(gm)	density	=	2.66	(gm/cc)
	G	=	-1.71567e+06	(J)	H	=	-1.19695e+06	(J)	S	=	297.58	(J/K)	V	=	37.64	(cc)	Cp	=	155.41	(J/K)
Oxygen	delta	moles	=	6.43057e-06	delta	grams	=	0.000205771
	G	=	-2.64	(J)	H	=	0.32	(J)	S	=	0	(J/K)	V	=	0.93	(cc)	Cp	=	0	(J/K)
**********----------**********
Title:	Dummy	Title
T	=	1460	(C)	P	=	5	(kbars)	log(10)	f	O2	=	-5.5	delta	HM	=	-5.22	NNO	=	-0.47	QFM	=	0	COH	=	2.24	IW	=	3.52
Constraint	Flags:	fO2	path	=	QFM
Liquid	mass	=	100.09	(gm)	density	=	2.66	(gm/cc)	viscosity	=	1.15	(log	10	poise)	(analysis	in	wt	%)
	G	=	-1.7127e+06	(J)	H	=	-1.1985e+06	(J)	S	=	296.68	(J/K)	V	=	37.61	(cc)	Cp	=	155.41	(J/K)
	SiO2	TiO2	Al2O3	Fe2O3	Cr2O3	FeO	MnO	MgO	NiO	CoO	CaO	Na2O	K2O	P2O5	H2O	CO2	SO3	Cl2O-1	F2O-1
	49.95	0.22	17.52	1.14	0	7.41	0.15	12.6	0	0	8.21	2.19	0.11	0	0.5	0	0	0	0
Total	solids	mass	=	0	(gm)	density	=	0	(gm/cc)
	G	=	0	(J)	H	=	0	(J)	S	=	0	(J/K)	V	=	0	(cc)	Cp	=	0	(J/K)
Viscosity	of	the	System:	1.15	(log	10	poise)
System	mass	=	100.09	(gm)	density	=	2.66	(gm/cc)
	G	=	-1.7127e+06	(J)	H	=	-1.1985e+06	(J)	S	=	296.68	(J/K)	V	=	37.61	(cc)	Cp	=	155.41	(J/K)
Oxygen	delta	moles	=	9.3212e-06	delta	grams	=	0.000298267
	G	=	-3.8	(J)	H	=	0.46	(J)	S	=	0	(J/K)	V	=	1.34	(cc)	Cp	=	0	(J/K)
**********----------**********
Title:	Dummy	Title
T	=	1450	(C)	P	=	5	(kbars)	log(10)	f	O2	=	-5.58	delta	HM	=	-5.22	NNO	=	-0.47	QFM	=	0	COH	=	2.23	IW	=	3.53
Constraint	Flags:	fO2	path	=	QFM
Liquid	mass	=	100.09	(gm)	density	=	2.66	(gm/cc)	viscosity	=	1.18	(log	10	poise)	(analysis	in	wt	%)
	G	=	-1.70974e+06	(J)	H	=	-1.20006e+06	(J)	S	=	295.78	(J/K)	V	=	37.58	(cc)	Cp	=	155.41	(J/K)
	SiO2	TiO2	Al2O3	Fe2O3	Cr2O3	FeO	MnO	MgO	NiO	CoO	CaO	Na2O	K2O	P2O5	H2O	CO2	SO3	Cl2O-1	F2O-1
	49.95	0.22	17.52	1.14	0	7.41	0.15	12.6	0	0	8.21	2.19	0.11	0	0.5	0	0	0	0
Total	solids	mass	=	0	(gm)	density	=	0	(gm/cc)
	G	=	0	(J)	H	=	0	(J)	S	=	0	(J/K)	V	=	0	(cc)	Cp	=	0	(J/K)
Viscosity	of	the	System:	1.18	(log	10	poise)
System	mass	=	100.09	(gm)	density	=	2.66	(gm/cc)
	G	=	-1.70974e+06	(J)	H	=	-1.20006e+06	(J)	S	=	295.78	(J/K)	V	=	37.58	(cc)	Cp	=	155.41	(J/K)
Oxygen	delta	moles	=	1.26008e-05	delta	grams	=	0.00040321
	G	=	-5.1	(J)	H	=	0.62	(J)	S	=	0	(J/K)	V	=	1.81	(cc)	Cp	=	0	(J/K)
**********----------**********
Title:	Dummy	Title
T	=	1440	(C)	P	=	5	(kbars)	log(10)	f	O2	=	-5.66	delta	HM	=	-5.22	NNO	=	-0.46	QFM	=	0	COH	=	2.22	IW	=	3.54
Constraint	Flags:	fO2	path	=	QFM
Liquid	mass	=	100.09	(gm)	density	=	2.67	(gm/cc)	viscosity	=	1.22	(log	10	poise)	(analysis	in	wt	%)
	G	=	-1.70679e+06	(J)	H	=	-1.20161e+06	(J)	S	=	294.88	(J/K)	V	=	37.55	(cc)	Cp	=	155.4	(J/K)
	SiO2	TiO2	Al2O3	Fe2O3	Cr2O3	FeO	MnO	MgO	NiO	CoO	CaO	Na2O	K2O	P2O5	H2O	CO2	SO3	Cl2O-1	F2O-1
	49.95	0.22	17.52	1.14	0	7.41	0.15	12.6	0	0	8.21	2.19	0.11	0	0.5	0	0	0	0
Total	solids	mass	=	0	(gm)	density	=	0	(gm/cc)
	G	=	0	(J)	H	=	0	(J)	S	=	0	(J/K)	V	=	0	(cc)	Cp	=	0	(J/K)
Viscosity	of	the	System:	1.22	(log	10	poise)
System	mass	=	100.09	(gm)	density	=	2.67	(gm/cc)
	G	=	-1.70679e+06	(J)	H	=	-1.20161e+06	(J)	S	=	294.88	(J/K)	V	=	37.55	(cc)	Cp	=	155.4	(J/K)
Oxygen	delta	moles	=	1.62791e-05	delta	grams	=	0.00052091
	G	=	-6.54	(J)	H	=	0.79	(J)	S	=	0	(J/K)	V	=	2.32	(cc)	Cp	=	0	(J/K)
**********----------**********
Title:	Dummy	Title
T	=	1430	(C)	P	=	5	(kbars)	log(10)	f	O2	=	-5.74	delta	HM	=	-5.22	NNO	=	-0.46	QFM	=	0	COH	=	2.22	IW	=	3.55
Constraint	Flags:	fO2	path	=	QFM
Liquid	mass	=	100.09	(gm)	density	=	2.67	(gm/cc)	viscosity	=	1.25	(log	10	poise)	(analysis	in	wt	%)
	G	=	-1.70384e+06	(J)	H	=	-1.20317e+06	(J)	S	=	293.97	(J/K)	V	=	37.52	(cc)	Cp	=	155.4	(J/K)
	SiO2	TiO2	Al2O3	Fe2O3	Cr2O3	FeO	MnO	MgO	NiO	CoO	CaO	Na2O	K2O	P2O5	H2O	CO2	SO3	Cl2O-1	F2O-1
	49.95	0.22	17.52	1.14	0	7.4	0.15	12.6	0	0	8.21	2.19	0.11	0	0.5	0	0	0	0
Total	solids	mass	=	0	(gm)	density	=	0	(gm/cc)
	G	=	0	(J)	H	=	0	(J)	S	=	0	(J/K)	V	=	0	(cc)	Cp	=	0	(J/K)
Viscosity	of	the	System:	1.25	(log	10	poise)
System	mass	=	100.09	(gm)	density	=	2.67	(gm/cc)
	G	=	-1.70384e+06	(J)	H	=	-1.20317e+06	(J)	S	=	293.97	(J/K)	V	=	37.52	(cc)	Cp	=	155.4	(J/K)
Oxygen	delta	moles	=	2.03662e-05	delta	grams	=	0.000651694
	G	=	-8.13	(J)	H	=	0.98	(J)	S	=	0.01	(J/K)	V	=	2.88	(cc)	Cp	=	0	(J/K)
**********----------**********
Title:	Dummy	Title
T	=	1420	(C)	P	=	5	(kbars)	log(10)	f	O2	=	-5.82	delta	HM	=	-5.22	NNO	=	-0.46	QFM	=	0	COH	=	2.21	IW	=	3.56
Constraint	Flags:	fO2	path	=	QFM
Liquid	mass	=	100.09	(gm)	density	=	2.67	(gm/cc)	viscosity	=	1.28	(log	10	poise)	(analysis	in	wt	%)
	G	=	-1.70091e+06	(J)	H	=	-1.20473e+06	(J)	S	=	293.06	(J/K)	V	=	37.49	(cc)	Cp	=	155.4	(J/K)
	SiO2	TiO2	Al2O3	Fe2O3	Cr2O3	FeO	MnO	MgO	NiO	CoO	CaO	Na2O	K2O	P2O5	H2O	CO2	SO3	Cl2O-1	F2O-1
	49.95	0.22	17.52	1.14	0	7.4	0.15	12.6	0	0	8.21	2.19	0.11	0	0.5	0	0	0	0
Total	solids	mass	=	0	(gm)	density	=	0	(gm/cc)
	G	=	0	(J)	H	=	0	(J)	S	=	0	(J/K)	V	=	0	(cc)	Cp	=	0	(J/K)
Viscosity	of	the	System:	1.28	(log	10	poise)
System	mass	=	100.09	(gm)	density	=	2.67	(gm/cc)
	G	=	-1.70091e+06	(J)	H	=	-1.20473e+06	(J)	S	=	293.06	(J/K)	V	=	37.49	(cc)	Cp	=	155.4	(J/K)
Oxygen	delta	moles	=	2.48727e-05	delta	grams	=	0.000795897
	G	=	-9.87	(J)	H	=	1.19	(J)	S	=	0.01	(J/K)	V	=	3.5	(cc)	Cp	=	0	(J/K)
**********----------**********
Title:	Dummy	Title
T	=	1410	(C)	P	=	5	(kbars)	log(10)	f	O2	=	-5.9	delta	HM	=	-5.22	NNO	=	-0.45	QFM	=	0	COH	=	2.2	IW	=	3.57
Constraint	Flags:	fO2	path	=	QFM
Liquid	mass	=	100.09	(gm)	density	=	2.67	(gm/cc)	viscosity	=	1.31	(log	10	poise)	(analysis	in	wt	%)
	G	=	-1.69799e+06	(J)	H	=	-1.20628e+06	(J)	S	=	292.14	(J/K)	V	=	37.46	(cc)	Cp	=	155.39	(J/K)
	SiO2	TiO2	Al2O3	Fe2O3	Cr2O3	FeO	MnO	MgO	NiO	CoO	CaO	Na2O	K2O	P2O5	H2O	CO2	SO3	Cl2O-1	F2O-1
	49.95	0.22	17.52	1.15	0	7.4	0.15	12.6	0	0	8.21	2.19	0.11	0	0.5	0	0	0	0
Total	solids	mass	=	0	(gm)	density	=	0	(gm/cc)
	G	=	0	(J)	H	=	0	(J)	S	=	0	(J/K)	V	=	0	(cc)	Cp	=	0	(J/K)
Viscosity	of	the	System:	1.31	(log	10	poise)
System	mass	=	100.09	(gm)	density	=	2.67	(gm/cc)
	G	=	-1.69799e+06	(J)	H	=	-1.20628e+06	(J)	S	=	292.14	(J/K)	V	=	37.46	(cc)	Cp	=	155.39	(J/K)
Oxygen	delta	moles	=	2.98096e-05	delta	grams	=	0.000953871
	G	=	-11.75	(J)	H	=	1.41	(J)	S	=	0.01	(J/K)	V	=	4.17	(cc)	Cp	=	0	(J/K)
**********----------**********
Title:	Dummy	Title
T	=	1400	(C)	P	=	5	(kbars)	log(10)	f	O2	=	-5.99	delta	HM	=	-5.22	NNO	=	-0.45	QFM	=	0	COH	=	2.19	IW	=	3.58
Constraint	Flags:	fO2	path	=	QFM
Liquid	mass	=	100.09	(gm)	density	=	2.67	(gm/cc)	viscosity	=	1.34	(log	10	poise)	(analysis	in	wt	%)
	G	=	-1.69508e+06	(J)	H	=	-1.20784e+06	(J)	S	=	291.21	(J/K)	V	=	37.43	(cc)	Cp	=	155.39	(J/K)
	SiO2	TiO2	Al2O3	Fe2O3	Cr2O3	FeO	MnO	MgO	NiO	CoO	CaO	Na2O	K2O	P2O5	H2O	CO2	SO3	Cl2O-1	F2O-1
	49.95	0.22	17.52	1.15	0	7.4	0.15	12.6	0	0	8.21	2.19	0.11	0	0.5	0	0	0	0
Total	solids	mass	=	0	(gm)	density	=	0	(gm/cc)
	G	=	0	(J)	H	=	0	(J)	S	=	0	(J/K)	V	=	0	(cc)	Cp	=	0	(J/K)
Viscosity	of	the	System:	1.34	(log	10	poise)
System	mass	=	100.09	(gm)	density	=	2.67	(gm/cc)
	G	=	-1.69508e+06	(J)	H	=	-1.20784e+06	(J)	S	=	291.21	(J/K)	V	=	37.43	(cc)	Cp	=	155.39	(J/K)
Oxygen	delta	moles	=	3.51882e-05	delta	grams	=	0.00112598
	G	=	-13.78	(J)	H	=	1.65	(J)	S	=	0.01	(J/K)	V	=	4.9	(cc)	Cp	=	0	(J/K)
**********----------**********
Title:	Dummy	Title
T	=	1390	(C)	P	=	5	(kbars)	log(10)	f	O2	=	-6.08	delta	HM	=	-5.22	NNO	=	-0.45	QFM	=	0	COH	=	2.18	IW	=	3.59
Constraint	Flags:	fO2	path	=	QFM
Liquid	mass	=	100.1	(gm)	density	=	2.68	(gm/cc)	viscosity	=	1.38	(log	10	poise)	(analysis	in	wt	%)
	G	=	-1.69217e+06	(J)	H	=	-1.20939e+06	(J)	S	=	290.28	(J/K)	V	=	37.4	(cc)	Cp	=	155.39	(J/K)
	SiO2	TiO2	Al2O3	Fe2O3	Cr2O3	FeO	MnO	MgO	NiO	CoO	CaO	Na2O	K2O	P2O5	H2O	CO2	SO3	Cl2O-1	F2O-1
	49.95	0.22	17.52	1.15	0	7.4	0.15	12.6	0	0	8.21	2.19	0.11	0	0.5	0	0	0	0
Total	solids	mass	=	0	(gm)	density	=	0	(gm/cc)
	G	=	0	(J)	H	=	0	(J)	S	=	0	(J/K)	V	=	0	(cc)	Cp	=	0	(J/K)
Viscosity	of	the	System:	1.38	(log	10	poise)
System	mass	=	100.1	(gm)	density	=	2.68	(gm/cc)
	G	=	-1.69217e+06	(J)	H	=	-1.20939e+06	(J)	S	=	290.28	(J/K)	V	=	37.4	(cc)	Cp	=	155.39	(J/K)
Oxygen	delta	moles	=	4.10203e-05	delta	grams	=	0.0013126
	G	=	-15.95	(J)	H	=	1.91	(J)	S	=	0.01	(J/K)	V	=	5.67	(cc)	Cp	=	0	(J/K)
**********----------**********
Title:	Dummy	Title
T	=	1380	(C)	P	=	5	(kbars)	log(10)	f	O2	=	-6.16	delta	HM	=	-5.22	NNO	=	-0.44	QFM	=	0	COH	=	2.17	IW	=	3.6
Constraint	Flags:	fO2	path	=	QFM
Liquid	mass	=	100.1	(gm)	density	=	2.68	(gm/cc)	viscosity	=	1.41	(log	10	poise)	(analysis	in	wt	%)
	G	=	-1.68928e+06	(J)	H	=	-1.21095e+06	(J)	S	=	289.34	(J/K)	V	=	37.37	(cc)	Cp	=	155.39	(J/K)
	SiO2	TiO2	Al2O3	Fe2O3	Cr2O3	FeO	MnO	MgO	NiO	CoO	CaO	Na2O	K2O	P2O5	H2O	CO2	SO3	Cl2O-1	F2O-1
	49.95	0.22	17.52	1.15	0	7.4	0.15	12.6	0	0	8.21	2.19	0.11	0	0.5	0	0	0	0
Total	solids	mass	=	0	(gm)	density	=	0	(gm/cc)
	G	=	0	(J)	H	=	0	(J)	S	=	0	(J/K)	V	=	0	(cc)	Cp	=	0	(J/K)
Viscosity	of	the	System:	1.41	(log	10	poise)
System	mass	=	100.1	(gm)	density	=	2.68	(gm/cc)
	G	=	-1.68928e+06	(J)	H	=	-1.21095e+06	(J)	S	=	289.34	(J/K)	V	=	37.37	(cc)	Cp	=	155.39	(J/K)
Oxygen	delta	moles	=	4.73183e-05	delta	grams	=	0.00151413
	G	=	-18.28	(J)	H	=	2.19	(J)	S	=	0.01	(J/K)	V	=	6.5	(cc)	Cp	=	0	(J/K)
**********----------**********
Title:	Dummy	Title
T	=	1370	(C)	P	=	5	(kbars)	log(10)	f	O2	=	-6.25	delta	HM	=	-5.22	NNO	=	-0.44	QFM	=	0	COH	=	2.16	IW	=	3.61
Constraint	Flags:	fO2	path	=	QFM
Liquid	mass	=	100.1	(gm)	density	=	2.68	(gm/cc)	viscosity	=	1.44	(log	10	poise)	(analysis	in	wt	%)
	G	=	-1.68639e+06	(J)	H	=	-1.21251e+06	(J)	S	=	288.4	(J/K)	V	=	37.34	(cc)	Cp	=	155.38	(J/K)
	SiO2	TiO2	Al2O3	Fe2O3	Cr2O3	FeO	MnO	MgO	NiO	CoO	CaO	Na2O	K2O	P2O5	H2O	CO2	SO3	Cl2O-1	F2O-1
	49.95	0.22	17.52	1.15	0	7.39	0.15	12.6	0	0	8.21	2.19	0.11	0	0.5	0	0	0	0
Total	solids	mass	=	0	(gm)	density	=	0	(gm/cc)
	G	=	0	(J)	H	=	0	(J)	S	=	0	(J/K)	V	=	0	(cc)	Cp	=	0	(J/K)
Viscosity	of	the	System:	1.44	(log	10	poise)
System	mass	=	100.1	(gm)	density	=	2.68	(gm/cc)
	G	=	-1.68639e+06	(J)	H	=	-1.21251e+06	(J)	S	=	288.4	(J/K)	V	=	37.34	(cc)	Cp	=	155.38	(J/K)
Oxygen	delta	moles	=	5.4095e-05	delta	grams	=	0.00173097
	G	=	-20.75	(J)	H	=	2.48	(J)	S	=	0.01	(J/K)	V	=	7.39	(cc)	Cp	=	0	(J/K)
**********----------**********
Title:	Dummy	Title
T	=	1360	(C)	P	=	5	(kbars)	log(10)	f	O2	=	-6.34	delta	HM	=	-5.22	NNO	=	-0.43	QFM	=	0	COH	=	2.15	IW	=	3.62
Constraint	Flags:	fO2	path	=	QFM
Liquid	mass	=	99.93	(gm)	density	=	2.68	(gm/cc)	viscosity	=	1.48	(log	10	poise)	(analysis	in	wt	%)
	G	=	-1.68062e+06	(J)	H	=	-1.21195e+06	(J)	S	=	286.97	(J/K)	V	=	37.25	(cc)	Cp	=	155.09	(J/K)
	SiO2	TiO2	Al2O3	Fe2O3	Cr2O3	FeO	MnO	MgO	NiO	CoO	CaO	Na2O	K2O	P2O5	H2O	CO2	SO3	Cl2O-1	F2O-1
	49.94	0.22	17.55	1.16	0	7.39	0.15	12.56	0	0	8.22	2.19	0.11	0	0.5	0	0	0	0
orthopyroxene	mass	=	0.17	(gm)	density	=	3.17	(gm/cc)	(analysis	in	mole	%)
	opx	Na0.00Ca0.03Fe''0.18Mg1.72Fe'''0.02Ti0.00Al0.14Si1.92O6
	G	=	-2897.86	(J)	H	=	-2182.72	(J)	S	=	0.44	(J/K)	V	=	0.05	(cc)	Cp	=	0.22	(J/K)
	diopside	clinoenstatit	hedenbergite	alumino-buffo	buffonite	essenite	jadeite
	-22.65	97.04	17.68	5.87	-5.73	7.67	0.11
Total	solids	mass	=	0.17	(gm)	density	=	3.17	(gm/cc)
	G	=	-2897.86	(J)	H	=	-2182.72	(J)	S	=	0.44	(J/K)	V	=	0.05	(cc)	Cp	=	0.22	(J/K)
Viscosity	of	the	System:	1.48	(log	10	poise)
System	mass	=	100.1	(gm)	density	=	2.68	(gm/cc)
	G	=	-1.68352e+06	(J)	H	=	-1.21414e+06	(J)	S	=	287.41	(J/K)	V	=	37.31	(cc)	Cp	=	155.32	(J/K)
Oxygen	delta	moles	=	6.13496e-05	delta	grams	=	0.00196311
	G	=	-23.38	(J)	H	=	2.79	(J)	S	=	0.02	(J/K)	V	=	8.33	(cc)	Cp	=	0	(J/K)
**********----------**********
Title:	Dummy	Title
T	=	1350	(C)	P	=	5	(kbars)	log(10)	f	O2	=	-6.43	delta	HM	=	-5.22	NNO	=	-0.43	QFM	=	0	COH	=	2.14	IW	=	3.63
Constraint	Flags:	fO2	path	=	QFM
Liquid	mass	=	97.86	(gm)	density	=	2.68	(gm/cc)	viscosity	=	1.53	(log	10	poise)	(analysis	in	wt	%)
	G	=	-1.64243e+06	(J)	H	=	-1187716	(J)	S	=	280.14	(J/K)	V	=	36.47	(cc)	Cp	=	151.61	(J/K)
	SiO2	TiO2	Al2O3	Fe2O3	Cr2O3	FeO	MnO	MgO	NiO	CoO	CaO	Na2O	K2O	P2O5	H2O	CO2	SO3	Cl2O-1	F2O-1
	49.82	0.22	17.85	1.17	0	7.42	0.15	12.13	0	0	8.38	2.24	0.11	0	0.51	0	0	0	0
orthopyroxene	mass	=	2.24	(gm)	density	=	3.17	(gm/cc)	(analysis	in	mole	%)
	opx	Na0.00Ca0.03Fe''0.18Mg1.71Fe'''0.02Ti0.00Al0.14Si1.92O6
	G	=	-38223.6	(J)	H	=	-28853.2	(J)	S	=	5.77	(J/K)	V	=	0.71	(cc)	Cp	=	2.93	(J/K)
	diopside	clinoenstatit	hedenbergite	alumino-buffo	buffonite	essenite	jadeite
	-23.28	96.87	18.22	6.08	-5.93	7.93	0.12
Total	solids	mass	=	2.24	(gm)	density	=	3.17	(gm/cc)
	G	=	-38223.6	(J)	H	=	-28853.2	(J)	S	=	5.77	(J/K)	V	=	0.71	(cc)	Cp	=	2.93	(J/K)
Viscosity	of	the	System:	1.56	(log	10	poise)
System	mass	=	100.1	(gm)	density	=	2.69	(gm/cc)
	G	=	-1.68065e+06	(J)	H	=	-1.21657e+06	(J)	S	=	285.92	(J/K)	V	=	37.18	(cc)	Cp	=	154.53	(J/K)
Oxygen	delta	moles	=	6.88133e-05	delta	grams	=	0.00220194
	G	=	-26.04	(J)	H	=	3.1	(J)	S	=	0.02	(J/K)	V	=	9.29	(cc)	Cp	=	0	(J/K)
**********----------**********
Title:	Dummy	Title
T	=	1340	(C)	P	=	5	(kbars)	log(10)	f	O2	=	-6.52	delta	HM	=	-5.22	NNO	=	-0.43	QFM	=	0	COH	=	2.13	IW	=	3.64
Constraint	Flags:	fO2	path	=	QFM
Liquid	mass	=	95.87	(gm)	density	=	2.68	(gm/cc)	viscosity	=	1.58	(log	10	poise)	(analysis	in	wt	%)
	G	=	-1.60587e+06	(J)	H	=	-1.16453e+06	(J)	S	=	273.59	(J/K)	V	=	35.72	(cc)	Cp	=	148.27	(J/K)
	SiO2	TiO2	Al2O3	Fe2O3	Cr2O3	FeO	MnO	MgO	NiO	CoO	CaO	Na2O	K2O	P2O5	H2O	CO2	SO3	Cl2O-1	F2O-1
	49.71	0.23	18.14	1.18	0	7.43	0.16	11.7	0	0	8.54	2.28	0.11	0	0.52	0	0	0	0
orthopyroxene	mass	=	4.23	(gm)	density	=	3.17	(gm/cc)	(analysis	in	mole	%)
	opx	Na0.00Ca0.03Fe''0.19Mg1.70Fe'''0.02Ti0.00Al0.15Si1.92O6
	G	=	-71934.4	(J)	H	=	-54417.4	(J)	S	=	10.86	(J/K)	V	=	1.33	(cc)	Cp	=	5.52	(J/K)
	diopside	clinoenstatit	hedenbergite	alumino-buffo	buffonite	essenite	jadeite
	-23.92	96.69	18.76	6.28	-6.12	8.18	0.12
Total	solids	mass	=	4.23	(gm)	density	=	3.17	(gm/cc)
	G	=	-71934.4	(J)	H	=	-54417.4	(J)	S	=	10.86	(J/K)	V	=	1.33	(cc)	Cp	=	5.52	(J/K)
Viscosity	of	the	System:	1.64	(log	10	poise)
System	mass	=	100.1	(gm)	density	=	2.7	(gm/cc)
	G	=	-1.67781e+06	(J)	H	=	-1.21895e+06	(J)	S	=	284.45	(J/K)	V	=	37.06	(cc)	Cp	=	153.78	(J/K)
Oxygen	delta	moles	=	7.63973e-05	delta	grams	=	0.00244462
	G	=	-28.71	(J)	H	=	3.42	(J)	S	=	0.02	(J/K)	V	=	10.25	(cc)	Cp	=	0	(J/K)
**********----------**********
Title:	Dummy	Title
T	=	1330	(C)	P	=	5	(kbars)	log(10)	f	O2	=	-6.61	delta	HM	=	-5.22	NNO	=	-0.42	QFM	=	0	COH	=	2.12	IW	=	3.65
Constraint	Flags:	fO2	path	=	QFM
Liquid	mass	=	93.96	(gm)	density	=	2.68	(gm/cc)	viscosity	=	1.63	(log	10	poise)	(analysis	in	wt	%)
	G	=	-1.57082e+06	(J)	H	=	-1.14231e+06	(J)	S	=	267.29	(J/K)	V	=	35.01	(cc)	Cp	=	145.06	(J/K)
	SiO2	TiO2	Al2O3	Fe2O3	Cr2O3	FeO	MnO	MgO	NiO	CoO	CaO	Na2O	K2O	P2O5	H2O	CO2	SO3	Cl2O-1	F2O-1
	49.61	0.23	18.43	1.19	0	7.43	0.16	11.29	0	0	8.69	2.33	0.12	0	0.53	0	0	0	0
orthopyroxene	mass	=	6.14	(gm)	density	=	3.18	(gm/cc)	(analysis	in	mole	%)
	opx	Na0.00Ca0.03Fe''0.19Mg1.69Fe'''0.02Ti0.00Al0.15Si1.91O6
	G	=	-104157	(J)	H	=	-78963.7	(J)	S	=	15.72	(J/K)	V	=	1.93	(cc)	Cp	=	8	(J/K)
	diopside	clinoenstatit	hedenbergite	alumino-buffo	buffonite	essenite	jadeite
	-24.56	96.5	19.32	6.49	-6.32	8.44	0.13
Total	solids	mass	=	6.14	(gm)	density	=	3.18	(gm/cc)
	G	=	-104157	(J)	H	=	-78963.7	(J)	S	=	15.72	(J/K)	V	=	1.93	(cc)	Cp	=	8	(J/K)
Viscosity	of	the	System:	1.73	(log	10	poise)
System	mass	=	100.1	(gm)	density	=	2.71	(gm/cc)
	G	=	-1.67497e+06	(J)	H	=	-1.22128e+06	(J)	S	=	283	(J/K)	V	=	36.94	(cc)	Cp	=	153.06	(J/K)
Oxygen	delta	moles	=	8.38886e-05	delta	grams	=	0.00268434
	G	=	-31.31	(J)	H	=	3.72	(J)	S	=	0.02	(J/K)	V	=	11.18	(cc)	Cp	=	0	(J/K)
**********----------**********
Title:	Dummy	Title
T	=	1320	(C)	P	=	5	(kbars)	log(10)	f	O2	=	-6.71	delta	HM	=	-5.22	NNO	=	-0.42	QFM	=	0	COH	=	2.11	IW	=	3.67
Constraint	Flags:	fO2	path	=	QFM
Liquid	mass	=	92.11	(gm)	density	=	2.68	(gm/cc)	viscosity	=	1.68	(log	10	poise)	(analysis	in	wt	%)
	G	=	-1.53715e+06	(J)	H	=	-1.12099e+06	(J)	S	=	261.22	(J/K)	V	=	34.31	(cc)	Cp	=	141.99	(J/K)
	SiO2	TiO2	Al2O3	Fe2O3	Cr2O3	FeO	MnO	MgO	NiO	CoO	CaO	Na2O	K2O	P2O5	H2O	CO2	SO3	Cl2O-1	F2O-1
	49.5	0.24	18.71	1.19	0	7.43	0.16	10.88	0	0	8.84	2.38	0.12	0	0.54	0	0	0	0
orthopyroxene	mass	=	7.98	(gm)	density	=	3.18	(gm/cc)	(analysis	in	mole	%)
	opx	Na0.00Ca0.04Fe''0.20Mg1.67Fe'''0.02Ti0.00Al0.16Si1.91O6
	G	=	-135009	(J)	H	=	-102573	(J)	S	=	20.36	(J/K)	V	=	2.51	(cc)	Cp	=	10.38	(J/K)
	diopside	clinoenstatit	hedenbergite	alumino-buffo	buffonite	essenite	jadeite
	-25.2	96.3	19.9	6.69	-6.52	8.69	0.14
Total	solids	mass	=	7.98	(gm)	density	=	3.18	(gm/cc)
	G	=	-135009	(J)	H	=	-102573	(J)	S	=	20.36	(J/K)	V	=	2.51	(cc)	Cp	=	10.38	(J/K)
Viscosity	of	the	System:	1.81	(log	10	poise)
System	mass	=	100.1	(gm)	density	=	2.72	(gm/cc)
	G	=	-1.67216e+06	(J)	H	=	-1.22356e+06	(J)	S	=	281.58	(J/K)	V	=	36.82	(cc)	Cp	=	152.36	(J/K)
Oxygen	delta	moles	=	9.10572e-05	delta	grams	=	0.00291372
	G	=	-33.75	(J)	H	=	4.01	(J)	S	=	0.02	(J/K)	V	=	12.06	(cc)	Cp	=	0	(J/K)
**********----------**********
Title:	Dummy	Title
T	=	1310	(C)	P	=	5	(kbars)	log(10)	f	O2	=	-6.8	delta	HM	=	-5.22	NNO	=	-0.41	QFM	=	0	COH	=	2.1	IW	=	3.68
Constraint	Flags:	fO2	path	=	QFM
Liquid	mass	=	90.33	(gm)	density	=	2.68	(gm/cc)	viscosity	=	1.74	(log	10	poise)	(analysis	in	wt	%)
	G	=	-1.50475e+06	(J)	H	=	-1.10048e+06	(J)	S	=	255.36	(J/K)	V	=	33.65	(cc)	Cp	=	139.02	(J/K)
	SiO2	TiO2	Al2O3	Fe2O3	Cr2O3	FeO	MnO	MgO	NiO	CoO	CaO	Na2O	K2O	P2O5	H2O	CO2	SO3	Cl2O-1	F2O-1
	49.41	0.24	18.99	1.2	0	7.42	0.17	10.48	0	0	8.99	2.42	0.12	0	0.55	0	0	0	0
orthopyroxene	mass	=	9.76	(gm)	density	=	3.19	(gm/cc)	(analysis	in	mole	%)
	opx	Na0.00Ca0.04Fe''0.20Mg1.66Fe'''0.02Ti0.00Al0.16Si1.91O6
	G	=	-164597	(J)	H	=	-125321	(J)	S	=	24.81	(J/K)	V	=	3.06	(cc)	Cp	=	12.67	(J/K)
	diopside	clinoenstatit	hedenbergite	alumino-buffo	buffonite	essenite	jadeite
	-25.85	96.09	20.48	6.9	-6.72	8.95	0.14
Total	solids	mass	=	9.76	(gm)	density	=	3.19	(gm/cc)
	G	=	-164597	(J)	H	=	-125321	(J)	S	=	24.81	(J/K)	V	=	3.06	(cc)	Cp	=	12.67	(J/K)
Viscosity	of	the	System:	1.89	(log	10	poise)
System	mass	=	100.1	(gm)	density	=	2.73	(gm/cc)
	G	=	-1.66935e+06	(J)	H	=	-1.2258e+06	(J)	S	=	280.17	(J/K)	V	=	36.71	(cc)	Cp	=	151.69	(J/K)
Oxygen	delta	moles	=	9.76532e-05	delta	grams	=	0.00312479
	G	=	-35.94	(J)	H	=	4.26	(J)	S	=	0.03	(J/K)	V	=	12.85	(cc)	Cp	=	0	(J/K)
**********----------**********
Title:	Dummy	Title
T	=	1300	(C)	P	=	5	(kbars)	log(10)	f	O2	=	-6.9	delta	HM	=	-5.22	NNO	=	-0.41	QFM	=	0	COH	=	2.09	IW	=	3.69
Constraint	Flags:	fO2	path	=	QFM
Liquid	mass	=	88.61	(gm)	density	=	2.68	(gm/cc)	viscosity	=	1.79	(log	10	poise)	(analysis	in	wt	%)
	G	=	-1.47354e+06	(J)	H	=	-1.08073e+06	(J)	S	=	249.69	(J/K)	V	=	33	(cc)	Cp	=	136.17	(J/K)
	SiO2	TiO2	Al2O3	Fe2O3	Cr2O3	FeO	MnO	MgO	NiO	CoO	CaO	Na2O	K2O	P2O5	H2O	CO2	SO3	Cl2O-1	F2O-1
	49.32	0.24	19.27	1.21	0	7.4	0.17	10.1	0	0	9.14	2.47	0.12	0	0.56	0	0	0	0
orthopyroxene	mass	=	11.48	(gm)	density	=	3.19	(gm/cc)	(analysis	in	mole	%)
	opx	Na0.00Ca0.04Fe''0.21Mg1.65Fe'''0.02Ti0.00Al0.16Si1.91O6
	G	=	-193021	(J)	H	=	-147277	(J)	S	=	29.08	(J/K)	V	=	3.6	(cc)	Cp	=	14.87	(J/K)
	diopside	clinoenstatit	hedenbergite	alumino-buffo	buffonite	essenite	jadeite
	-26.49	95.86	21.09	7.11	-6.91	9.2	0.15
Total	solids	mass	=	11.48	(gm)	density	=	3.19	(gm/cc)
	G	=	-193021	(J)	H	=	-147277	(J)	S	=	29.08	(J/K)	V	=	3.6	(cc)	Cp	=	14.87	(J/K)
Viscosity	of	the	System:	1.98	(log	10	poise)
System	mass	=	100.1	(gm)	density	=	2.73	(gm/cc)
	G	=	-1.66656e+06	(J)	H	=	-1.22801e+06	(J)	S	=	278.77	(J/K)	V	=	36.6	(cc)	Cp	=	151.04	(J/K)
Oxygen	delta	moles	=	0.000103406	delta	grams	=	0.00330886
	G	=	-37.79	(J)	H	=	4.47	(J)	S	=	0.03	(J/K)	V	=	13.53	(cc)	Cp	=	0	(J/K)
**********----------**********
Title:	Dummy	Title
T	=	1290	(C)	P	=	5	(kbars)	log(10)	f	O2	=	-6.99	delta	HM	=	-5.22	NNO	=	-0.41	QFM	=	0	COH	=	2.08	IW	=	3.7
Constraint	Flags:	fO2	path	=	QFM
Liquid	mass	=	86.95	(gm)	density	=	2.68	(gm/cc)	viscosity	=	1.84	(log	10	poise)	(analysis	in	wt	%)
	G	=	-1.4434e+06	(J)	H	=	-1.06167e+06	(J)	S	=	244.21	(J/K)	V	=	32.38	(cc)	Cp	=	133.41	(J/K)
	SiO2	TiO2	Al2O3	Fe2O3	Cr2O3	FeO	MnO	MgO	NiO	CoO	CaO	Na2O	K2O	P2O5	H2O	CO2	SO3	Cl2O-1	F2O-1
	49.24	0.25	19.55	1.21	0	7.37	0.17	9.72	0	0	9.28	2.52	0.13	0	0.58	0	0	0	0
orthopyroxene	mass	=	13.15	(gm)	density	=	3.2	(gm/cc)	(analysis	in	mole	%)
	opx	Na0.00Ca0.04Fe''0.22Mg1.64Fe'''0.02Ti0.00Al0.17Si1.90O6
	G	=	-220376	(J)	H	=	-168508	(J)	S	=	33.18	(J/K)	V	=	4.11	(cc)	Cp	=	16.99	(J/K)
	diopside	clinoenstatit	hedenbergite	alumino-buffo	buffonite	essenite	jadeite
	-27.12	95.61	21.7	7.31	-7.11	9.45	0.16
Total	solids	mass	=	13.15	(gm)	density	=	3.2	(gm/cc)
	G	=	-220376	(J)	H	=	-168508	(J)	S	=	33.18	(J/K)	V	=	4.11	(cc)	Cp	=	16.99	(J/K)
Viscosity	of	the	System:	2.06	(log	10	poise)
System	mass	=	100.1	(gm)	density	=	2.74	(gm/cc)
	G	=	-1.66378e+06	(J)	H	=	-1.23017e+06	(J)	S	=	277.39	(J/K)	V	=	36.5	(cc)	Cp	=	150.4	(J/K)
Oxygen	delta	moles	=	0.00010802	delta	grams	=	0.0034565
	G	=	-39.19	(J)	H	=	4.63	(J)	S	=	0.03	(J/K)	V	=	14.04	(cc)	Cp	=	0	(J/K)
**********----------**********
Title:	Dummy	Title
T	=	1280	(C)	P	=	5	(kbars)	log(10)	f	O2	=	-7.09	delta	HM	=	-5.22	NNO	=	-0.4	QFM	=	0	COH	=	2.07	IW	=	3.71
Constraint	Flags:	fO2	path	=	QFM
Liquid	mass	=	85.33	(gm)	density	=	2.68	(gm/cc)	viscosity	=	1.9	(log	10	poise)	(analysis	in	wt	%)
	G	=	-1.41426e+06	(J)	H	=	-1.04323e+06	(J)	S	=	238.89	(J/K)	V	=	31.78	(cc)	Cp	=	130.74	(J/K)
	SiO2	TiO2	Al2O3	Fe2O3	Cr2O3	FeO	MnO	MgO	NiO	CoO	CaO	Na2O	K2O	P2O5	H2O	CO2	SO3	Cl2O-1	F2O-1
	49.16	0.25	19.82	1.22	0	7.33	0.18	9.35	0	0	9.43	2.56	0.13	0	0.59	0	0	0	0
orthopyroxene	mass	=	14.77	(gm)	density	=	3.2	(gm/cc)	(analysis	in	mole	%)
	opx	Na0.00Ca0.04Fe''0.22Mg1.63Fe'''0.02Ti0.00Al0.17Si1.90O6
	G	=	-246750	(J)	H	=	-189076	(J)	S	=	37.13	(J/K)	V	=	4.61	(cc)	Cp	=	19.05	(J/K)
	diopside	clinoenstatit	hedenbergite	alumino-buffo	buffonite	essenite	jadeite
	-27.75	95.34	22.34	7.52	-7.31	9.7	0.17
Total	solids	mass	=	14.77	(gm)	density	=	3.2	(gm/cc)
	G	=	-246750	(J)	H	=	-189076	(J)	S	=	37.13	(J/K)	V	=	4.61	(cc)	Cp	=	19.05	(J/K)
Viscosity	of	the	System:	2.15	(log	10	poise)
System	mass	=	100.1	(gm)	density	=	2.75	(gm/cc)
	G	=	-1.66101e+06	(J)	H	=	-1.23231e+06	(J)	S	=	276.02	(J/K)	V	=	36.39	(cc)	Cp	=	149.79	(J/K)
Oxygen	delta	moles	=	0.000111175	delta	grams	=	0.00355747
	G	=	-40.05	(J)	H	=	4.73	(J)	S	=	0.03	(J/K)	V	=	14.36	(cc)	Cp	=	0	(J/K)
**********----------**********
Title:	Dummy	Title
T	=	1270	(C)	P	=	5	(kbars)	log(10)	f	O2	=	-7.19	delta	HM	=	-5.22	NNO	=	-0.4	QFM	=	0	COH	=	2.06	IW	=	3.73
Constraint	Flags:	fO2	path	=	QFM
Liquid	mass	=	83.75	(gm)	density	=	2.68	(gm/cc)	viscosity	=	1.95	(log	10	poise)	(analysis	in	wt	%)
	G	=	-1.38603e+06	(J)	H	=	-1.02537e+06	(J)	S	=	233.72	(J/K)	V	=	31.19	(cc)	Cp	=	128.15	(J/K)
	SiO2	TiO2	Al2O3	Fe2O3	Cr2O3	FeO	MnO	MgO	NiO	CoO	CaO	Na2O	K2O	P2O5	H2O	CO2	SO3	Cl2O-1	F2O-1
	49.08	0.25	20.1	1.22	0	7.28	0.18	8.98	0	0	9.57	2.61	0.13	0	0.6	0	0	0	0
orthopyroxene	mass	=	16.35	(gm)	density	=	3.21	(gm/cc)	(analysis	in	mole	%)
	opx	Na0.00Ca0.05Fe''0.23Mg1.62Fe'''0.02Ti0.00Al0.18Si1.90O6
	G	=	-272228	(J)	H	=	-209041	(J)	S	=	40.95	(J/K)	V	=	5.1	(cc)	Cp	=	21.04	(J/K)
	diopside	clinoenstatit	hedenbergite	alumino-buffo	buffonite	essenite	jadeite
	-28.38	95.05	22.99	7.72	-7.5	9.95	0.17
Total	solids	mass	=	16.35	(gm)	density	=	3.21	(gm/cc)
	G	=	-272228	(J)	H	=	-209041	(J)	S	=	40.95	(J/K)	V	=	5.1	(cc)	Cp	=	21.04	(J/K)
Viscosity	of	the	System:	2.24	(log	10	poise)
System	mass	=	100.1	(gm)	density	=	2.76	(gm/cc)
	G	=	-1.65826e+06	(J)	H	=	-1.23441e+06	(J)	S	=	274.67	(J/K)	V	=	36.29	(cc)	Cp	=	149.19	(J/K)
Oxygen	delta	moles	=	0.000112523	delta	grams	=	0.00360061
	G	=	-40.24	(J)	H	=	4.74	(J)	S	=	0.03	(J/K)	V	=	14.44	(cc)	Cp	=	0	(J/K)
**********----------**********
Title:	Dummy	Title
T	=	1260	(C)	P	=	5	(kbars)	log(10)	f	O2	=	-7.29	delta	HM	=	-5.22	NNO	=	-0.39	QFM	=	0	COH	=	2.05	IW	=	3.74
Constraint	Flags:	fO2	path	=	QFM
Liquid	mass	=	82.21	(gm)	density	=	2.68	(gm/cc)	viscosity	=	2.01	(log	10	poise)	(analysis	in	wt	%)
	G	=	-1.35863e+06	(J)	H	=	-1.00802e+06	(J)	S	=	228.69	(J/K)	V	=	30.63	(cc)	Cp	=	125.64	(J/K)
	SiO2	TiO2	Al2O3	Fe2O3	Cr2O3	FeO	MnO	MgO	NiO	CoO	CaO	Na2O	K2O	P2O5	H2O	CO2	SO3	Cl2O-1	F2O-1
	49.01	0.26	20.37	1.22	0	7.22	0.18	8.63	0	0	9.7	2.66	0.13	0	0.61	0	0	0	0
orthopyroxene	mass	=	17.89	(gm)	density	=	3.21	(gm/cc)	(analysis	in	mole	%)
	opx	Na0.00Ca0.05Fe''0.24Mg1.61Fe'''0.02Ti0.00Al0.18Si1.90O6
	G	=	-296889	(J)	H	=	-228461	(J)	S	=	44.63	(J/K)	V	=	5.57	(cc)	Cp	=	22.97	(J/K)
	diopside	clinoenstatit	hedenbergite	alumino-buffo	buffonite	essenite	jadeite
	-28.99	94.74	23.65	7.93	-7.7	10.19	0.18
Total	solids	mass	=	17.89	(gm)	density	=	3.21	(gm/cc)
	G	=	-296889	(J)	H	=	-228461	(J)	S	=	44.63	(J/K)	V	=	5.57	(cc)	Cp	=	22.97	(J/K)
Viscosity	of	the	System:	2.33	(log	10	poise)
System	mass	=	100.1	(gm)	density	=	2.77	(gm/cc)
	G	=	-1.65552e+06	(J)	H	=	-1.23648e+06	(J)	S	=	273.32	(J/K)	V	=	36.2	(cc)	Cp	=	148.61	(J/K)
Oxygen	delta	moles	=	0.000111686	delta	grams	=	0.00357382
	G	=	-39.65	(J)	H	=	4.67	(J)	S	=	0.03	(J/K)	V	=	14.24	(cc)	Cp	=	0	(J/K)
**********----------**********
Title:	Dummy	Title
T	=	1250	(C)	P	=	5	(kbars)	log(10)	f	O2	=	-7.4	delta	HM	=	-5.22	NNO	=	-0.39	QFM	=	0	COH	=	2.04	IW	=	3.75
Constraint	Flags:	fO2	path	=	QFM
Liquid	mass	=	80.71	(gm)	density	=	2.68	(gm/cc)	viscosity	=	2.07	(log	10	poise)	(analysis	in	wt	%)
	G	=	-1.33198e+06	(J)	H	=	-991134	(J)	S	=	223.78	(J/K)	V	=	30.07	(cc)	Cp	=	123.19	(J/K)
	SiO2	TiO2	Al2O3	Fe2O3	Cr2O3	FeO	MnO	MgO	NiO	CoO	CaO	Na2O	K2O	P2O5	H2O	CO2	SO3	Cl2O-1	F2O-1
	48.95	0.26	20.64	1.22	0	7.15	0.19	8.28	0	0	9.84	2.71	0.14	0	0.62	0	0	0	0
orthopyroxene	mass	=	19.39	(gm)	density	=	3.22	(gm/cc)	(analysis	in	mole	%)
	opx	Na0.00Ca0.05Fe''0.24Mg1.59Fe'''0.03Ti0.00Al0.19Si1.89O6
	G	=	-320814	(J)	H	=	-247393	(J)	S	=	48.2	(J/K)	V	=	6.03	(cc)	Cp	=	24.84	(J/K)
	diopside	clinoenstatit	hedenbergite	alumino-buffo	buffonite	essenite	jadeite
	-29.58	94.4	24.33	8.13	-7.9	10.43	0.19
Total	solids	mass	=	19.39	(gm)	density	=	3.22	(gm/cc)
	G	=	-320814	(J)	H	=	-247393	(J)	S	=	48.2	(J/K)	V	=	6.03	(cc)	Cp	=	24.84	(J/K)
Viscosity	of	the	System:	2.42	(log	10	poise)
System	mass	=	100.1	(gm)	density	=	2.77	(gm/cc)
	G	=	-1.65279e+06	(J)	H	=	-1.23853e+06	(J)	S	=	271.98	(J/K)	V	=	36.1	(cc)	Cp	=	148.03	(J/K)
Oxygen	delta	moles	=	0.000108254	delta	grams	=	0.00346401
	G	=	-38.16	(J)	H	=	4.49	(J)	S	=	0.03	(J/K)	V	=	13.71	(cc)	Cp	=	0	(J/K)
**********----------**********
Title:	Dummy	Title
T	=	1240	(C)	P	=	5	(kbars)	log(10)	f	O2	=	-7.5	delta	HM	=	-5.22	NNO	=	-0.38	QFM	=	0	COH	=	2.03	IW	=	3.76
Constraint	Flags:	fO2	path	=	QFM
Liquid	mass	=	79.23	(gm)	density	=	2.68	(gm/cc)	viscosity	=	2.12	(log	10	poise)	(analysis	in	wt	%)
	G	=	-1.306e+06	(J)	H	=	-974655	(J)	S	=	218.97	(J/K)	V	=	29.53	(cc)	Cp	=	120.8	(J/K)
	SiO2	TiO2	Al2O3	Fe2O3	Cr2O3	FeO	MnO	MgO	NiO	CoO	CaO	Na2O	K2O	P2O5	H2O	CO2	SO3	Cl2O-1	F2O-1
	48.89	0.27	20.91	1.22	0	7.08	0.19	7.95	0	0	9.97	2.76	0.14	0	0.63	0	0	0	0
orthopyroxene	mass	=	20.87	(gm)	density	=	3.22	(gm/cc)	(analysis	in	mole	%)
	opx	Na0.00Ca0.06Fe''0.25Mg1.58Fe'''0.03Ti0.00Al0.19Si1.89O6
	G	=	-344079	(J)	H	=	-265892	(J)	S	=	51.67	(J/K)	V	=	6.48	(cc)	Cp	=	26.67	(J/K)
	diopside	clinoenstatit	hedenbergite	alumino-buffo	buffonite	essenite	jadeite
	-30.16	94.03	25.02	8.33	-8.09	10.66	0.2
Total	solids	mass	=	20.87	(gm)	density	=	3.22	(gm/cc)
	G	=	-344079	(J)	H	=	-265892	(J)	S	=	51.67	(J/K)	V	=	6.48	(cc)	Cp	=	26.67	(J/K)
Viscosity	of	the	System:	2.51	(log	10	poise)
System	mass	=	100.1	(gm)	density	=	2.78	(gm/cc)
	G	=	-1.65008e+06	(J)	H	=	-1.24055e+06	(J)	S	=	270.65	(J/K)	V	=	36.01	(cc)	Cp	=	147.47	(J/K)
Oxygen	delta	moles	=	0.000101787	delta	grams	=	0.00325705
	G	=	-35.61	(J)	H	=	4.18	(J)	S	=	0.03	(J/K)	V	=	12.81	(cc)	Cp	=	0	(J/K)
**********----------**********
Title:	Dummy	Title
T	=	1230	(C)	P	=	5	(kbars)	log(10)	f	O2	=	-7.6	delta	HM	=	-5.22	NNO	=	-0.38	QFM	=	0	COH	=	2.02	IW	=	3.78
Constraint	Flags:	fO2	path	=	QFM
Liquid	mass	=	72.9	(gm)	density	=	2.68	(gm/cc)	viscosity	=	2.15	(log	10	poise)	(analysis	in	wt	%)
	G	=	-1.19768e+06	(J)	H	=	-895338	(J)	S	=	201.14	(J/K)	V	=	27.17	(cc)	Cp	=	110.93	(J/K)
	SiO2	TiO2	Al2O3	Fe2O3	Cr2O3	FeO	MnO	MgO	NiO	CoO	CaO	Na2O	K2O	P2O5	H2O	CO2	SO3	Cl2O-1	F2O-1
	48.8	0.29	20.91	1.26	0	7.27	0.21	7.6	0	0	9.94	2.89	0.15	0	0.69	0	0	0	0
orthopyroxene	mass	=	23.62	(gm)	density	=	3.23	(gm/cc)	(analysis	in	mole	%)
	opx	Na0.00Ca0.06Fe''0.26Mg1.57Fe'''0.03Ti0.00Al0.19Si1.89O6
	G	=	-387885	(J)	H	=	-300311	(J)	S	=	58.26	(J/K)	V	=	7.32	(cc)	Cp	=	30.11	(J/K)
	diopside	clinoenstatit	hedenbergite	alumino-buffo	buffonite	essenite	jadeite
	-30.9	93.66	26.09	8.32	-8.07	10.68	0.21
feldspar	mass	=	3.57	(gm)	density	=	2.69	(gm/cc)	(analysis	in	mole	%)
	K0.00Na0.19Ca0.81Al1.81Si2.19O8
	G	=	-61790.5	(J)	H	=	-48574.8	(J)	S	=	8.79	(J/K)	V	=	1.33	(cc)	Cp	=	4.41	(J/K)
	albite	anorthite	sanidine
	18.67	81.26	0.07
Total	solids	mass	=	27.19	(gm)	density	=	3.14	(gm/cc)
	G	=	-449675	(J)	H	=	-348886	(J)	S	=	67.05	(J/K)	V	=	8.65	(cc)	Cp	=	34.52	(J/K)
Viscosity	of	the	System:	2.73	(log	10	poise)
System	mass	=	100.1	(gm)	density	=	2.79	(gm/cc)
	G	=	-1.64735e+06	(J)	H	=	-1.24422e+06	(J)	S	=	268.19	(J/K)	V	=	35.82	(cc)	Cp	=	145.45	(J/K)
Oxygen	delta	moles	=	5.76455e-05	delta	grams	=	0.00184459
	G	=	-20.02	(J)	H	=	2.35	(J)	S	=	0.01	(J/K)	V	=	7.2	(cc)	Cp	=	0	(J/K)
**********----------**********
Title:	Dummy	Title
T	=	1220	(C)	P	=	5	(kbars)	log(10)	f	O2	=	-7.71	delta	HM	=	-5.22	NNO	=	-0.37	QFM	=	0	COH	=	2.01	IW	=	3.79
Constraint	Flags:	fO2	path	=	QFM
Liquid	mass	=	62.92	(gm)	density	=	2.68	(gm/cc)	viscosity	=	2.15	(log	10	poise)	(analysis	in	wt	%)
	G	=	-1.02796e+06	(J)	H	=	-768703	(J)	S	=	173.63	(J/K)	V	=	23.46	(cc)	Cp	=	95.48	(J/K)
	SiO2	TiO2	Al2O3	Fe2O3	Cr2O3	FeO	MnO	MgO	NiO	CoO	CaO	Na2O	K2O	P2O5	H2O	CO2	SO3	Cl2O-1	F2O-1
	48.63	0.33	20.61	1.36	0	7.76	0.24	7.27	0	0	9.72	3.12	0.17	0	0.79	0	0	0	0
orthopyroxene	mass	=	27.2	(gm)	density	=	3.23	(gm/cc)	(analysis	in	mole	%)
	opx	Na0.00Ca0.06Fe''0.27Mg1.55Fe'''0.03Ti0.00Al0.19Si1.89O6
	G	=	-444381	(J)	H	=	-344642	(J)	S	=	66.8	(J/K)	V	=	8.41	(cc)	Cp	=	34.57	(J/K)
	diopside	clinoenstatit	hedenbergite	alumino-buffo	buffonite	essenite	jadeite
	-31.8	93.3	27.49	8.11	-7.81	10.49	0.22
feldspar	mass	=	9.97	(gm)	density	=	2.69	(gm/cc)	(analysis	in	mole	%)
	K0.00Na0.19Ca0.81Al1.81Si2.19O8
	G	=	-172303	(J)	H	=	-135749	(J)	S	=	24.48	(J/K)	V	=	3.71	(cc)	Cp	=	12.3	(J/K)
	albite	anorthite	sanidine
	19.31	80.61	0.08
Total	solids	mass	=	37.17	(gm)	density	=	3.07	(gm/cc)
	G	=	-616684	(J)	H	=	-480391	(J)	S	=	91.28	(J/K)	V	=	12.12	(cc)	Cp	=	46.86	(J/K)
Viscosity	of	the	System:	3.14	(log	10	poise)
System	mass	=	100.09	(gm)	density	=	2.81	(gm/cc)
	G	=	-1.64464e+06	(J)	H	=	-1.24909e+06	(J)	S	=	264.91	(J/K)	V	=	35.58	(cc)	Cp	=	142.34	(J/K)
Oxygen	delta	moles	=	-2.43692e-05	delta	grams	=	-0.000779785
	G	=	8.4	(J)	H	=	-0.98	(J)	S	=	-0.01	(J/K)	V	=	-3.03	(cc)	Cp	=	0	(J/K)
**********----------**********
Title:	Dummy	Title
T	=	1210	(C)	P	=	5	(kbars)	log(10)	f	O2	=	-7.82	delta	HM	=	-5.22	NNO	=	-0.37	QFM	=	0	COH	=	2	IW	=	3.8
Constraint	Flags:	fO2	path	=	QFM
Liquid	mass	=	54.2	(gm)	density	=	2.67	(gm/cc)	viscosity	=	2.16	(log	10	poise)	(analysis	in	wt	%)
	G	=	-882746	(J)	H	=	-660637	(J)	S	=	149.75	(J/K)	V	=	20.26	(cc)	Cp	=	82.07	(J/K)
	SiO2	TiO2	Al2O3	Fe2O3	Cr2O3	FeO	MnO	MgO	NiO	CoO	CaO	Na2O	K2O	P2O5	H2O	CO2	SO3	Cl2O-1	F2O-1
	48.52	0.37	20.71	1.4	0	8.01	0.28	6.88	0	0	9.29	3.41	0.2	0	0.92	0	0	0	0
orthopyroxene	mass	=	25.3	(gm)	density	=	3.24	(gm/cc)	(analysis	in	mole	%)
	opx	Na0.00Ca0.06Fe''0.29Mg1.54Fe'''0.03Ti0.00Al0.19Si1.89O6
	G	=	-411690	(J)	H	=	-319900	(J)	S	=	61.89	(J/K)	V	=	7.81	(cc)	Cp	=	32.08	(J/K)
	diopside	clinoenstatit	hedenbergite	alumino-buffo	buffonite	essenite	jadeite
	-33.11	93.36	28.53	8.21	-7.86	10.63	0.23
clinopyroxene	mass	=	6.19	(gm)	density	=	3.25	(gm/cc)	(analysis	in	mole	%)
	cpx	Na0.01Ca0.26Fe''0.32Mg1.28Fe'''0.04Ti0.00Al0.24Si1.86O6
	G	=	-99187.6	(J)	H	=	-76839.6	(J)	S	=	15.07	(J/K)	V	=	1.91	(cc)	Cp	=	7.65	(J/K)
	diopside	clinoenstatit	hedenbergite	alumino-buffo	buffonite	essenite	jadeite
	-19.64	73.55	31.61	10	-9.55	13.13	0.9
feldspar	mass	=	14.4	(gm)	density	=	2.69	(gm/cc)	(analysis	in	mole	%)
	K0.00Na0.20Ca0.80Al1.80Si2.20O8
	G	=	-248347	(J)	H	=	-196086	(J)	S	=	35.24	(J/K)	V	=	5.36	(cc)	Cp	=	17.73	(J/K)
	albite	anorthite	sanidine
	20.01	79.89	0.09
Total	solids	mass	=	45.89	(gm)	density	=	3.04	(gm/cc)
	G	=	-759225	(J)	H	=	-592826	(J)	S	=	112.19	(J/K)	V	=	15.07	(cc)	Cp	=	57.46	(J/K)
Viscosity	of	the	System:	3.83	(log	10	poise)
System	mass	=	100.09	(gm)	density	=	2.83	(gm/cc)
	G	=	-1.64197e+06	(J)	H	=	-1.25346e+06	(J)	S	=	261.95	(J/K)	V	=	35.34	(cc)	Cp	=	139.54	(J/K)
Oxygen	delta	moles	=	-9.11065e-05	delta	grams	=	-0.0029153
	G	=	31.17	(J)	H	=	-3.64	(J)	S	=	-0.02	(J/K)	V	=	-11.23	(cc)	Cp	=	0	(J/K)
**********----------**********
Title:	Dummy	Title
T	=	1200	(C)	P	=	5	(kbars)	log(10)	f	O2	=	-7.93	delta	HM	=	-5.22	NNO	=	-0.37	QFM	=	0	COH	=	1.99	IW	=	3.82
Constraint	Flags:	fO2	path	=	QFM
Liquid	mass	=	47.28	(gm)	density	=	2.67	(gm/cc)	viscosity	=	2.17	(log	10	poise)	(analysis	in	wt	%)
	G	=	-768219	(J)	H	=	-575470	(J)	S	=	130.84	(J/K)	V	=	17.73	(cc)	Cp	=	69.8	(J/K)
	SiO2	TiO2	Al2O3	Fe2O3	Cr2O3	FeO	MnO	MgO	NiO	CoO	CaO	Na2O	K2O	P2O5	H2O	CO2	SO3	Cl2O-1	F2O-1
	48.43	0.4	20.87	1.44	0	8.18	0.32	6.51	0	0	8.86	3.71	0.23	0	1.06	0	0	0	0
orthopyroxene	mass	=	23.47	(gm)	density	=	3.25	(gm/cc)	(analysis	in	mole	%)
	opx	Na0.00Ca0.06Fe''0.29Mg1.53Fe'''0.03Ti0.00Al0.19Si1.89O6
	G	=	-380405	(J)	H	=	-296179	(J)	S	=	57.17	(J/K)	V	=	7.23	(cc)	Cp	=	29.69	(J/K)
	diopside	clinoenstatit	hedenbergite	alumino-buffo	buffonite	essenite	jadeite
	-34.38	93.46	29.44	8.36	-7.94	10.81	0.24
clinopyroxene	mass	=	11.56	(gm)	density	=	3.25	(gm/cc)	(analysis	in	mole	%)
	cpx	Na0.01Ca0.26Fe''0.33Mg1.26Fe'''0.04Ti0.00Al0.24Si1.86O6
	G	=	-184478	(J)	H	=	-143195	(J)	S	=	28.02	(J/K)	V	=	3.55	(cc)	Cp	=	14.25	(J/K)
	diopside	clinoenstatit	hedenbergite	alumino-buffo	buffonite	essenite	jadeite
	-20.83	73.46	32.53	10.19	-9.65	13.36	0.94
feldspar	mass	=	17.78	(gm)	density	=	2.69	(gm/cc)	(analysis	in	mole	%)
	K0.00Na0.21Ca0.79Al1.79Si2.21O8
	G	=	-306234	(J)	H	=	-242321	(J)	S	=	43.38	(J/K)	V	=	6.61	(cc)	Cp	=	21.88	(J/K)
	albite	anorthite	sanidine
	20.65	79.24	0.11
Total	solids	mass	=	52.81	(gm)	density	=	3.03	(gm/cc)
	G	=	-871117	(J)	H	=	-681695	(J)	S	=	128.58	(J/K)	V	=	17.4	(cc)	Cp	=	65.82	(J/K)
Viscosity	of	the	System:	6.22	(log	10	poise)
System	mass	=	100.09	(gm)	density	=	2.85	(gm/cc)
	G	=	-1.63934e+06	(J)	H	=	-1.25716e+06	(J)	S	=	259.43	(J/K)	V	=	35.13	(cc)	Cp	=	135.62	(J/K)
Oxygen	delta	moles	=	-0.000139916	delta	grams	=	-0.00447713
	G	=	47.51	(J)	H	=	-5.54	(J)	S	=	-0.04	(J/K)	V	=	-17.14	(cc)	Cp	=	-0.01	(J/K)
**********----------**********
Title:	Dummy	Title
T	=	1190	(C)	P	=	5	(kbars)	log(10)	f	O2	=	-8.04	delta	HM	=	-5.22	NNO	=	-0.36	QFM	=	0	COH	=	1.98	IW	=	3.83
Constraint	Flags:	fO2	path	=	QFM
Liquid	mass	=	41.64	(gm)	density	=	2.65	(gm/cc)	viscosity	=	2.21	(log	10	poise)	(analysis	in	wt	%)
	G	=	-675675	(J)	H	=	-506778	(J)	S	=	115.43	(J/K)	V	=	15.69	(cc)	Cp	=	61.33	(J/K)
	SiO2	TiO2	Al2O3	Fe2O3	Cr2O3	FeO	MnO	MgO	NiO	CoO	CaO	Na2O	K2O	P2O5	H2O	CO2	SO3	Cl2O-1	F2O-1
	48.54	0.43	21	1.45	0	8.2	0.36	6.1	0	0	8.45	4.01	0.25	0	1.2	0	0	0	0
orthopyroxene	mass	=	21.54	(gm)	density	=	3.25	(gm/cc)	(analysis	in	mole	%)
	opx	Na0.00Ca0.06Fe''0.30Mg1.52Fe'''0.03Ti0.00Al0.20Si1.89O6
	G	=	-347781	(J)	H	=	-271326	(J)	S	=	52.25	(J/K)	V	=	6.62	(cc)	Cp	=	27.18	(J/K)
	diopside	clinoenstatit	hedenbergite	alumino-buffo	buffonite	essenite	jadeite
	-35.46	93.52	30.33	8.43	-7.94	10.86	0.25
clinopyroxene	mass	=	16.45	(gm)	density	=	3.26	(gm/cc)	(analysis	in	mole	%)
	cpx	Na0.01Ca0.26Fe''0.33Mg1.25Fe'''0.04Ti0.00Al0.25Si1.86O6
	G	=	-261516	(J)	H	=	-203411	(J)	S	=	39.71	(J/K)	V	=	5.05	(cc)	Cp	=	20.23	(J/K)
	diopside	clinoenstatit	hedenbergite	alumino-buffo	buffonite	essenite	jadeite
	-21.55	73.11	33.33	10.29	-9.66	13.47	1
feldspar	mass	=	20.27	(gm)	density	=	2.69	(gm/cc)	(analysis	in	mole	%)
	K0.00Na0.21Ca0.78Al1.78Si2.22O8
	G	=	-348672	(J)	H	=	-276498	(J)	S	=	49.33	(J/K)	V	=	7.54	(cc)	Cp	=	24.92	(J/K)
	albite	anorthite	sanidine
	21.45	78.43	0.12
spinel	mass	=	0.19	(gm)	density	=	3.72	(gm/cc)	(analysis	in	mole	%)
	Fe''0.23Mg0.78Fe'''0.16Al1.83Cr0.00Ti0.00O4
	G	=	-3103.62	(J)	H	=	-2430.58	(J)	S	=	0.46	(J/K)	V	=	0.05	(cc)	Cp	=	0.24	(J/K)
	chromite	hercynite	magnetite	spinel	ulvospinel
	0	13.74	8.17	77.62	0.47
Total	solids	mass	=	58.45	(gm)	density	=	3.03	(gm/cc)
	G	=	-961073	(J)	H	=	-753665	(J)	S	=	141.75	(J/K)	V	=	19.27	(cc)	Cp	=	72.58	(J/K)
Viscosity	of	the	System	cannot	be	computed.
System	mass	=	100.09	(gm)	density	=	2.86	(gm/cc)
	G	=	-1.63675e+06	(J)	H	=	-1.26044e+06	(J)	S	=	257.19	(J/K)	V	=	34.96	(cc)	Cp	=	133.91	(J/K)
Oxygen	delta	moles	=	-0.000150232	delta	grams	=	-0.00480725
	G	=	50.63	(J)	H	=	-5.89	(J)	S	=	-0.04	(J/K)	V	=	-18.28	(cc)	Cp	=	-0.01	(J/K)
**********----------**********
Title:	Dummy	Title
T	=	1180	(C)	P	=	5	(kbars)	log(10)	f	O2	=	-8.15	delta	HM	=	-5.22	NNO	=	-0.36	QFM	=	0	COH	=	1.96	IW	=	3.84
Constraint	Flags:	fO2	path	=	QFM
Liquid	mass	=	36.96	(gm)	density	=	2.64	(gm/cc)	viscosity	=	2.26	(log	10	poise)	(analysis	in	wt	%)
	G	=	-599603	(J)	H	=	-450410	(J)	S	=	102.67	(J/K)	V	=	14	(cc)	Cp	=	54.32	(J/K)
	SiO2	TiO2	Al2O3	Fe2O3	Cr2O3	FeO	MnO	MgO	NiO	CoO	CaO	Na2O	K2O	P2O5	H2O	CO2	SO3	Cl2O-1	F2O-1
	48.82	0.46	21.09	1.45	0	8.08	0.41	5.69	0	0	8.07	4.31	0.28	0	1.35	0	0	0	0
orthopyroxene	mass	=	19.81	(gm)	density	=	3.26	(gm/cc)	(analysis	in	mole	%)
	opx	Na0.00Ca0.06Fe''0.31Mg1.51Fe'''0.03Ti0.00Al0.19Si1.89O6
	G	=	-318752	(J)	H	=	-249186	(J)	S	=	47.87	(J/K)	V	=	6.08	(cc)	Cp	=	24.95	(J/K)
	diopside	clinoenstatit	hedenbergite	alumino-buffo	buffonite	essenite	jadeite
	-36.37	93.54	31.22	8.41	-7.85	10.79	0.26
clinopyroxene	mass	=	20.63	(gm)	density	=	3.26	(gm/cc)	(analysis	in	mole	%)
	cpx	Na0.01Ca0.26Fe''0.34Mg1.24Fe'''0.04Ti0.00Al0.25Si1.86O6
	G	=	-326759	(J)	H	=	-254704	(J)	S	=	49.59	(J/K)	V	=	6.32	(cc)	Cp	=	25.3	(J/K)
	diopside	clinoenstatit	hedenbergite	alumino-buffo	buffonite	essenite	jadeite
	-21.8	72.52	34.04	10.32	-9.59	13.46	1.05
feldspar	mass	=	22.16	(gm)	density	=	2.69	(gm/cc)	(analysis	in	mole	%)
	K0.00Na0.22Ca0.77Al1.77Si2.23O8
	G	=	-380667	(J)	H	=	-302512	(J)	S	=	53.78	(J/K)	V	=	8.25	(cc)	Cp	=	27.23	(J/K)
	albite	anorthite	sanidine
	22.4	77.47	0.13
spinel	mass	=	0.53	(gm)	density	=	3.73	(gm/cc)	(analysis	in	mole	%)
	Fe''0.24Mg0.77Fe'''0.17Al1.82Cr0.00Ti0.01O4
	G	=	-8412.96	(J)	H	=	-6598.16	(J)	S	=	1.25	(J/K)	V	=	0.14	(cc)	Cp	=	0.66	(J/K)
	chromite	hercynite	magnetite	spinel	ulvospinel
	0	14.1	8.42	76.94	0.54
Total	solids	mass	=	63.13	(gm)	density	=	3.04	(gm/cc)
	G	=	-1.03459e+06	(J)	H	=	-813000	(J)	S	=	152.49	(J/K)	V	=	20.8	(cc)	Cp	=	78.14	(J/K)
Viscosity	of	the	System	cannot	be	computed.
System	mass	=	100.09	(gm)	density	=	2.88	(gm/cc)
	G	=	-1.63419e+06	(J)	H	=	-1.26341e+06	(J)	S	=	255.16	(J/K)	V	=	34.8	(cc)	Cp	=	132.46	(J/K)
Oxygen	delta	moles	=	-0.000136167	delta	grams	=	-0.00435718
	G	=	45.54	(J)	H	=	-5.29	(J)	S	=	-0.03	(J/K)	V	=	-16.45	(cc)	Cp	=	0	(J/K)
**********----------**********
Title:	Dummy	Title
T	=	1170	(C)	P	=	5	(kbars)	log(10)	f	O2	=	-8.27	delta	HM	=	-5.22	NNO	=	-0.35	QFM	=	0	COH	=	1.95	IW	=	3.86
Constraint	Flags:	fO2	path	=	QFM
Liquid	mass	=	33.27	(gm)	density	=	2.63	(gm/cc)	viscosity	=	2.31	(log	10	poise)	(analysis	in	wt	%)
	G	=	-539184	(J)	H	=	-405596	(J)	S	=	92.57	(J/K)	V	=	12.66	(cc)	Cp	=	48.77	(J/K)
	SiO2	TiO2	Al2O3	Fe2O3	Cr2O3	FeO	MnO	MgO	NiO	CoO	CaO	Na2O	K2O	P2O5	H2O	CO2	SO3	Cl2O-1	F2O-1
	49.07	0.48	21.14	1.46	0	8.06	0.45	5.28	0	0	7.68	4.57	0.31	0	1.5	0	0	0	0
orthopyroxene	mass	=	21.8	(gm)	density	=	3.26	(gm/cc)	(analysis	in	mole	%)
	opx	Na0.00Ca0.06Fe''0.32Mg1.50Fe'''0.03Ti0.00Al0.19Si1.89O6
	G	=	-349210	(J)	H	=	-273510	(J)	S	=	52.45	(J/K)	V	=	6.68	(cc)	Cp	=	27.39	(J/K)
	diopside	clinoenstatit	hedenbergite	alumino-buffo	buffonite	essenite	jadeite
	-37.63	93.56	32.44	8.39	-7.78	10.76	0.27
clinopyroxene	mass	=	18.39	(gm)	density	=	3.27	(gm/cc)	(analysis	in	mole	%)
	cpx	Na0.01Ca0.26Fe''0.35Mg1.22Fe'''0.04Ti0.00Al0.25Si1.86O6
	G	=	-290073	(J)	H	=	-226534	(J)	S	=	44.03	(J/K)	V	=	5.62	(cc)	Cp	=	22.5	(J/K)
	diopside	clinoenstatit	hedenbergite	alumino-buffo	buffonite	essenite	jadeite
	-23.17	72.6	35.18	10.34	-9.53	13.48	1.09
clinopyroxene	mass	=	2.06	(gm)	density	=	3.26	(gm/cc)	(analysis	in	mole	%)
	cpx	Na0.02Ca0.67Fe''0.21Mg0.90Fe'''0.05Ti0.01Al0.31Si1.82O6
	G	=	-33003.2	(J)	H	=	-26010.4	(J)	S	=	4.85	(J/K)	V	=	0.63	(cc)	Cp	=	2.46	(J/K)
	diopside	clinoenstatit	hedenbergite	alumino-buffo	buffonite	essenite	jadeite
	28.08	30.6	21.34	12.41	-10.79	16.02	2.35
feldspar	mass	=	23.73	(gm)	density	=	2.68	(gm/cc)	(analysis	in	mole	%)
	K0.00Na0.23Ca0.76Al1.76Si2.24O8
	G	=	-407185	(J)	H	=	-324273	(J)	S	=	57.45	(J/K)	V	=	8.84	(cc)	Cp	=	29.14	(J/K)
	albite	anorthite	sanidine
	23.36	76.49	0.15
spinel	mass	=	0.83	(gm)	density	=	3.74	(gm/cc)	(analysis	in	mole	%)
	Fe''0.25Mg0.76Fe'''0.17Al1.81Cr0.00Ti0.01O4
	G	=	-13022.5	(J)	H	=	-10224.6	(J)	S	=	1.94	(J/K)	V	=	0.22	(cc)	Cp	=	1.02	(J/K)
	chromite	hercynite	magnetite	spinel	ulvospinel
	0	14.65	8.75	75.98	0.62
Total	solids	mass	=	66.82	(gm)	density	=	3.04	(gm/cc)
	G	=	-1.09249e+06	(J)	H	=	-860553	(J)	S	=	160.72	(J/K)	V	=	22	(cc)	Cp	=	82.52	(J/K)
Viscosity	of	the	System	cannot	be	computed.
System	mass	=	100.09	(gm)	density	=	2.89	(gm/cc)
	G	=	-1.63168e+06	(J)	H	=	-1.26615e+06	(J)	S	=	253.29	(J/K)	V	=	34.67	(cc)	Cp	=	131.29	(J/K)
Oxygen	delta	moles	=	-8.99989e-05	delta	grams	=	-0.00287986
	G	=	29.87	(J)	H	=	-3.47	(J)	S	=	-0.02	(J/K)	V	=	-10.8	(cc)	Cp	=	0	(J/K)
**********----------**********
Title:	Dummy	Title
T	=	1160	(C)	P	=	5	(kbars)	log(10)	f	O2	=	-8.38	delta	HM	=	-5.22	NNO	=	-0.35	QFM	=	0	COH	=	1.94	IW	=	3.87
Constraint	Flags:	fO2	path	=	QFM
Liquid	mass	=	30.22	(gm)	density	=	2.62	(gm/cc)	viscosity	=	2.35	(log	10	poise)	(analysis	in	wt	%)
	G	=	-489107	(J)	H	=	-368440	(J)	S	=	84.2	(J/K)	V	=	11.55	(cc)	Cp	=	44.19	(J/K)
	SiO2	TiO2	Al2O3	Fe2O3	Cr2O3	FeO	MnO	MgO	NiO	CoO	CaO	Na2O	K2O	P2O5	H2O	CO2	SO3	Cl2O-1	F2O-1
	49.3	0.49	21.16	1.47	0	8.08	0.5	4.89	0	0	7.31	4.81	0.34	0	1.65	0	0	0	0
orthopyroxene	mass	=	25.37	(gm)	density	=	3.27	(gm/cc)	(analysis	in	mole	%)
	opx	Na0.00Ca0.06Fe''0.34Mg1.48Fe'''0.03Ti0.00Al0.19Si1.89O6
	G	=	-404542	(J)	H	=	-317422	(J)	S	=	60.79	(J/K)	V	=	7.76	(cc)	Cp	=	31.79	(J/K)
	diopside	clinoenstatit	hedenbergite	alumino-buffo	buffonite	essenite	jadeite
	-39.05	93.58	33.8	8.38	-7.73	10.74	0.27
clinopyroxene	mass	=	13.51	(gm)	density	=	3.28	(gm/cc)	(analysis	in	mole	%)
	cpx	Na0.01Ca0.26Fe''0.37Mg1.21Fe'''0.04Ti0.00Al0.25Si1.86O6
	G	=	-212026	(J)	H	=	-165879	(J)	S	=	32.2	(J/K)	V	=	4.12	(cc)	Cp	=	16.48	(J/K)
	diopside	clinoenstatit	hedenbergite	alumino-buffo	buffonite	essenite	jadeite
	-24.97	72.94	36.52	10.35	-9.48	13.51	1.12
clinopyroxene	mass	=	4.79	(gm)	density	=	3.26	(gm/cc)	(analysis	in	mole	%)
	cpx	Na0.02Ca0.68Fe''0.22Mg0.89Fe'''0.05Ti0.01Al0.31Si1.82O6
	G	=	-76350.7	(J)	H	=	-60301.5	(J)	S	=	11.2	(J/K)	V	=	1.47	(cc)	Cp	=	5.7	(J/K)
	diopside	clinoenstatit	hedenbergite	alumino-buffo	buffonite	essenite	jadeite
	27.84	29.97	21.82	12.52	-10.7	16.09	2.46
feldspar	mass	=	25.1	(gm)	density	=	2.68	(gm/cc)	(analysis	in	mole	%)
	K0.00Na0.24Ca0.76Al1.76Si2.24O8
	G	=	-430022	(J)	H	=	-343188	(J)	S	=	60.59	(J/K)	V	=	9.36	(cc)	Cp	=	30.8	(J/K)
	albite	anorthite	sanidine
	24.31	75.53	0.16
spinel	mass	=	1.1	(gm)	density	=	3.76	(gm/cc)	(analysis	in	mole	%)
	Fe''0.26Mg0.75Fe'''0.18Al1.80Cr0.00Ti0.01O4
	G	=	-17137.7	(J)	H	=	-13468	(J)	S	=	2.56	(J/K)	V	=	0.29	(cc)	Cp	=	1.35	(J/K)
	chromite	hercynite	magnetite	spinel	ulvospinel
	0	15.32	9.13	74.86	0.69
Total	solids	mass	=	69.87	(gm)	density	=	3.04	(gm/cc)
	G	=	-1.14008e+06	(J)	H	=	-900259	(J)	S	=	167.34	(J/K)	V	=	23	(cc)	Cp	=	86.12	(J/K)
Viscosity	of	the	System	cannot	be	computed.
System	mass	=	100.09	(gm)	density	=	2.9	(gm/cc)
	G	=	-1.62919e+06	(J)	H	=	-1.2687e+06	(J)	S	=	251.54	(J/K)	V	=	34.56	(cc)	Cp	=	130.32	(J/K)
Oxygen	delta	moles	=	-3.18714e-05	delta	grams	=	-0.00101985
	G	=	10.49	(J)	H	=	-1.22	(J)	S	=	-0.01	(J/K)	V	=	-3.8	(cc)	Cp	=	0	(J/K)
**********----------**********
Title:	Dummy	Title
T	=	1150	(C)	P	=	5	(kbars)	log(10)	f	O2	=	-8.5	delta	HM	=	-5.22	NNO	=	-0.34	QFM	=	0	COH	=	1.93	IW	=	3.89
Constraint	Flags:	fO2	path	=	QFM
Liquid	mass	=	27.62	(gm)	density	=	2.6	(gm/cc)	viscosity	=	2.39	(log	10	poise)	(analysis	in	wt	%)
	G	=	-446433	(J)	H	=	-336776	(J)	S	=	77.05	(J/K)	V	=	10.61	(cc)	Cp	=	40.3	(J/K)
	SiO2	TiO2	Al2O3	Fe2O3	Cr2O3	FeO	MnO	MgO	NiO	CoO	CaO	Na2O	K2O	P2O5	H2O	CO2	SO3	Cl2O-1	F2O-1
	49.52	0.49	21.17	1.48	0	8.09	0.54	4.53	0	0	6.96	5.02	0.37	0	1.81	0	0	0	0
orthopyroxene	mass	=	29.55	(gm)	density	=	3.28	(gm/cc)	(analysis	in	mole	%)
	opx	Na0.00Ca0.06Fe''0.35Mg1.47Fe'''0.03Ti0.00Al0.19Si1.89O6
	G	=	-468764	(J)	H	=	-368474	(J)	S	=	70.47	(J/K)	V	=	9.02	(cc)	Cp	=	36.92	(J/K)
	diopside	clinoenstatit	hedenbergite	alumino-buffo	buffonite	essenite	jadeite
	-40.5	93.6	35.21	8.35	-7.67	10.72	0.28
clinopyroxene	mass	=	7.76	(gm)	density	=	3.28	(gm/cc)	(analysis	in	mole	%)
	cpx	Na0.01Ca0.26Fe''0.38Mg1.20Fe'''0.04Ti0.00Al0.25Si1.86O6
	G	=	-121176	(J)	H	=	-94970.6	(J)	S	=	18.41	(J/K)	V	=	2.36	(cc)	Cp	=	9.44	(J/K)
	diopside	clinoenstatit	hedenbergite	alumino-buffo	buffonite	essenite	jadeite
	-26.81	73.28	37.9	10.36	-9.43	13.55	1.15
clinopyroxene	mass	=	7.51	(gm)	density	=	3.27	(gm/cc)	(analysis	in	mole	%)
	cpx	Na0.03Ca0.68Fe''0.22Mg0.87Fe'''0.06Ti0.01Al0.31Si1.82O6
	G	=	-119256	(J)	H	=	-94388.5	(J)	S	=	17.47	(J/K)	V	=	2.3	(cc)	Cp	=	8.91	(J/K)
	diopside	clinoenstatit	hedenbergite	alumino-buffo	buffonite	essenite	jadeite
	27.6	29.33	22.3	12.62	-10.6	16.16	2.58
feldspar	mass	=	26.32	(gm)	density	=	2.68	(gm/cc)	(analysis	in	mole	%)
	K0.00Na0.25Ca0.75Al1.75Si2.25O8
	G	=	-450203	(J)	H	=	-360059	(J)	S	=	63.34	(J/K)	V	=	9.81	(cc)	Cp	=	32.26	(J/K)
	albite	anorthite	sanidine
	25.24	74.59	0.17
spinel	mass	=	1.35	(gm)	density	=	3.77	(gm/cc)	(analysis	in	mole	%)
	Fe''0.27Mg0.74Fe'''0.19Al1.79Cr0.00Ti0.01O4
	G	=	-20880.6	(J)	H	=	-16423.4	(J)	S	=	3.13	(J/K)	V	=	0.36	(cc)	Cp	=	1.65	(J/K)
	chromite	hercynite	magnetite	spinel	ulvospinel
	0	16.02	9.54	73.67	0.77
Total	solids	mass	=	72.48	(gm)	density	=	3.04	(gm/cc)
	G	=	-1.18028e+06	(J)	H	=	-934315	(J)	S	=	172.83	(J/K)	V	=	23.85	(cc)	Cp	=	89.18	(J/K)
Viscosity	of	the	System	cannot	be	computed.
System	mass	=	100.09	(gm)	density	=	2.91	(gm/cc)
	G	=	-1.62671e+06	(J)	H	=	-1.27109e+06	(J)	S	=	249.88	(J/K)	V	=	34.45	(cc)	Cp	=	129.48	(J/K)
Oxygen	delta	moles	=	2.75213e-05	delta	grams	=	0.00088065
	G	=	-8.99	(J)	H	=	1.04	(J)	S	=	0.01	(J/K)	V	=	3.26	(cc)	Cp	=	0	(J/K)
**********----------**********
Title:	Dummy	Title
T	=	1140	(C)	P	=	5	(kbars)	log(10)	f	O2	=	-8.62	delta	HM	=	-5.22	NNO	=	-0.34	QFM	=	0	COH	=	1.92	IW	=	3.9
Constraint	Flags:	fO2	path	=	QFM
Liquid	mass	=	25.37	(gm)	density	=	2.59	(gm/cc)	viscosity	=	2.42	(log	10	poise)	(analysis	in	wt	%)
	G	=	-409613	(J)	H	=	-309453	(J)	S	=	70.88	(J/K)	V	=	9.78	(cc)	Cp	=	36.95	(J/K)
	SiO2	TiO2	Al2O3	Fe2O3	Cr2O3	FeO	MnO	MgO	NiO	CoO	CaO	Na2O	K2O	P2O5	H2O	CO2	SO3	Cl2O-1	F2O-1
	49.72	0.49	21.17	1.5	0	8.1	0.59	4.2	0	0	6.64	5.22	0.4	0	1.97	0	0	0	0
orthopyroxene	mass	=	34.25	(gm)	density	=	3.28	(gm/cc)	(analysis	in	mole	%)
	opx	Na0.00Ca0.06Fe''0.37Mg1.46Fe'''0.03Ti0.00Al0.19Si1.89O6
	G	=	-540692	(J)	H	=	-425768	(J)	S	=	81.32	(J/K)	V	=	10.43	(cc)	Cp	=	42.68	(J/K)
	diopside	clinoenstatit	hedenbergite	alumino-buffo	buffonite	essenite	jadeite
	-42	93.62	36.69	8.33	-7.62	10.71	0.29
clinopyroxene	mass	=	1.28	(gm)	density	=	3.29	(gm/cc)	(analysis	in	mole	%)
	cpx	Na0.01Ca0.25Fe''0.39Mg1.19Fe'''0.04Ti0.00Al0.25Si1.85O6
	G	=	-19891	(J)	H	=	-15617	(J)	S	=	3.02	(J/K)	V	=	0.39	(cc)	Cp	=	1.55	(J/K)
	diopside	clinoenstatit	hedenbergite	alumino-buffo	buffonite	essenite	jadeite
	-28.68	73.62	39.31	10.37	-9.39	13.59	1.18
clinopyroxene	mass	=	10.2	(gm)	density	=	3.27	(gm/cc)	(analysis	in	mole	%)
	cpx	Na0.03Ca0.69Fe''0.23Mg0.86Fe'''0.06Ti0.01Al0.32Si1.82O6
	G	=	-161415	(J)	H	=	-128028	(J)	S	=	23.63	(J/K)	V	=	3.11	(cc)	Cp	=	12.07	(J/K)
	diopside	clinoenstatit	hedenbergite	alumino-buffo	buffonite	essenite	jadeite
	27.35	28.71	22.8	12.72	-10.5	16.24	2.69
feldspar	mass	=	27.41	(gm)	density	=	2.68	(gm/cc)	(analysis	in	mole	%)
	K0.00Na0.26Ca0.74Al1.74Si2.26O8
	G	=	-468290	(J)	H	=	-375323	(J)	S	=	65.79	(J/K)	V	=	10.23	(cc)	Cp	=	33.57	(J/K)
	albite	anorthite	sanidine
	26.13	73.68	0.19
spinel	mass	=	1.59	(gm)	density	=	3.79	(gm/cc)	(analysis	in	mole	%)
	Fe''0.28Mg0.72Fe'''0.20Al1.78Cr0.00Ti0.01O4
	G	=	-24354	(J)	H	=	-19170	(J)	S	=	3.67	(J/K)	V	=	0.42	(cc)	Cp	=	1.93	(J/K)
	chromite	hercynite	magnetite	spinel	ulvospinel
	0	16.78	9.97	72.41	0.84
Total	solids	mass	=	74.72	(gm)	density	=	3.04	(gm/cc)
	G	=	-1.21464e+06	(J)	H	=	-963905	(J)	S	=	177.43	(J/K)	V	=	24.58	(cc)	Cp	=	91.81	(J/K)
Viscosity	of	the	System	cannot	be	computed.
System	mass	=	100.1	(gm)	density	=	2.91	(gm/cc)
	G	=	-1.62426e+06	(J)	H	=	-1.27336e+06	(J)	S	=	248.31	(J/K)	V	=	34.37	(cc)	Cp	=	128.76	(J/K)
Oxygen	delta	moles	=	8.7967e-05	delta	grams	=	0.00281484
	G	=	-28.52	(J)	H	=	3.29	(J)	S	=	0.02	(J/K)	V	=	10.34	(cc)	Cp	=	0	(J/K)
**********----------**********
Title:	Dummy	Title
T	=	1130	(C)	P	=	5	(kbars)	log(10)	f	O2	=	-8.74	delta	HM	=	-5.22	NNO	=	-0.33	QFM	=	0	COH	=	1.9	IW	=	3.92
Constraint	Flags:	fO2	path	=	QFM
Liquid	mass	=	23.25	(gm)	density	=	2.58	(gm/cc)	viscosity	=	2.46	(log	10	poise)	(analysis	in	wt	%)
	G	=	-375493	(J)	H	=	-284181	(J)	S	=	65.08	(J/K)	V	=	9.02	(cc)	Cp	=	33.81	(J/K)
	SiO2	TiO2	Al2O3	Fe2O3	Cr2O3	FeO	MnO	MgO	NiO	CoO	CaO	Na2O	K2O	P2O5	H2O	CO2	SO3	Cl2O-1	F2O-1
	49.99	0.49	21.25	1.48	0	7.89	0.65	3.9	0	0	6.33	5.44	0.43	0	2.15	0	0	0	0
orthopyroxene	mass	=	35.56	(gm)	density	=	3.29	(gm/cc)	(analysis	in	mole	%)
	opx	Na0.00Ca0.06Fe''0.38Mg1.45Fe'''0.03Ti0.00Al0.19Si1.89O6
	G	=	-559196	(J)	H	=	-441236	(J)	S	=	84.07	(J/K)	V	=	10.81	(cc)	Cp	=	44.21	(J/K)
	diopside	clinoenstatit	hedenbergite	alumino-buffo	buffonite	essenite	jadeite
	-43.03	93.67	37.68	8.31	-7.57	10.66	0.29
clinopyroxene	mass	=	11.14	(gm)	density	=	3.28	(gm/cc)	(analysis	in	mole	%)
	cpx	Na0.03Ca0.70Fe''0.23Mg0.85Fe'''0.06Ti0.01Al0.32Si1.81O6
	G	=	-176016	(J)	H	=	-139945	(J)	S	=	25.71	(J/K)	V	=	3.4	(cc)	Cp	=	13.16	(J/K)
	diopside	clinoenstatit	hedenbergite	alumino-buffo	buffonite	essenite	jadeite
	28.01	27.65	22.83	12.86	-10.41	16.25	2.81
feldspar	mass	=	28.34	(gm)	density	=	2.68	(gm/cc)	(analysis	in	mole	%)
	K0.00Na0.27Ca0.73Al1.73Si2.27O8
	G	=	-483505	(J)	H	=	-388344	(J)	S	=	67.82	(J/K)	V	=	10.58	(cc)	Cp	=	34.68	(J/K)
	albite	anorthite	sanidine
	27.01	72.78	0.2
spinel	mass	=	1.81	(gm)	density	=	3.8	(gm/cc)	(analysis	in	mole	%)
	Fe''0.29Mg0.72Fe'''0.20Al1.78Cr0.00Ti0.01O4
	G	=	-27583.8	(J)	H	=	-21743.9	(J)	S	=	4.16	(J/K)	V	=	0.48	(cc)	Cp	=	2.2	(J/K)
	chromite	hercynite	magnetite	spinel	ulvospinel
	0	17.26	10.21	71.62	0.9
Total	solids	mass	=	76.85	(gm)	density	=	3.04	(gm/cc)
	G	=	-1.2463e+06	(J)	H	=	-991270	(J)	S	=	181.76	(J/K)	V	=	25.27	(cc)	Cp	=	94.25	(J/K)
Viscosity	of	the	System	cannot	be	computed.
System	mass	=	100.1	(gm)	density	=	2.92	(gm/cc)
	G	=	-1.62179e+06	(J)	H	=	-1.27545e+06	(J)	S	=	246.83	(J/K)	V	=	34.28	(cc)	Cp	=	128.07	(J/K)
Oxygen	delta	moles	=	0.000113048	delta	grams	=	0.00361741
	G	=	-36.36	(J)	H	=	4.19	(J)	S	=	0.03	(J/K)	V	=	13.19	(cc)	Cp	=	0	(J/K)
**********----------**********
Title:	Dummy	Title
T	=	1120	(C)	P	=	5	(kbars)	log(10)	f	O2	=	-8.86	delta	HM	=	-5.22	NNO	=	-0.32	QFM	=	0	COH	=	1.89	IW	=	3.93
Constraint	Flags:	fO2	path	=	QFM
Liquid	mass	=	21.35	(gm)	density	=	2.56	(gm/cc)	viscosity	=	2.5	(log	10	poise)	(analysis	in	wt	%)
	G	=	-345139	(J)	H	=	-261700	(J)	S	=	59.89	(J/K)	V	=	8.33	(cc)	Cp	=	31.02	(J/K)
	SiO2	TiO2	Al2O3	Fe2O3	Cr2O3	FeO	MnO	MgO	NiO	CoO	CaO	Na2O	K2O	P2O5	H2O	CO2	SO3	Cl2O-1	F2O-1
	50.28	0.48	21.34	1.45	0	7.62	0.7	3.63	0	0	6.04	5.66	0.46	0	2.34	0	0	0	0
orthopyroxene	mass	=	35.97	(gm)	density	=	3.29	(gm/cc)	(analysis	in	mole	%)
	opx	Na0.00Ca0.06Fe''0.38Mg1.44Fe'''0.03Ti0.00Al0.19Si1.89O6
	G	=	-563881	(J)	H	=	-445885	(J)	S	=	84.7	(J/K)	V	=	10.93	(cc)	Cp	=	44.64	(J/K)
	diopside	clinoenstatit	hedenbergite	alumino-buffo	buffonite	essenite	jadeite
	-43.87	93.73	38.48	8.3	-7.53	10.59	0.3
clinopyroxene	mass	=	11.6	(gm)	density	=	3.28	(gm/cc)	(analysis	in	mole	%)
	cpx	Na0.03Ca0.71Fe''0.23Mg0.83Fe'''0.06Ti0.01Al0.32Si1.81O6
	G	=	-182943	(J)	H	=	-145816	(J)	S	=	26.65	(J/K)	V	=	3.54	(cc)	Cp	=	13.68	(J/K)
	diopside	clinoenstatit	hedenbergite	alumino-buffo	buffonite	essenite	jadeite
	28.89	26.53	22.72	13.01	-10.32	16.23	2.93
feldspar	mass	=	29.17	(gm)	density	=	2.68	(gm/cc)	(analysis	in	mole	%)
	K0.00Na0.28Ca0.72Al1.72Si2.28O8
	G	=	-496875	(J)	H	=	-399936	(J)	S	=	69.58	(J/K)	V	=	10.89	(cc)	Cp	=	35.66	(J/K)
	albite	anorthite	sanidine
	27.86	71.92	0.22
spinel	mass	=	2.01	(gm)	density	=	3.8	(gm/cc)	(analysis	in	mole	%)
	Fe''0.30Mg0.71Fe'''0.21Al1.77Cr0.00Ti0.01O4
	G	=	-30500.3	(J)	H	=	-24085.1	(J)	S	=	4.6	(J/K)	V	=	0.53	(cc)	Cp	=	2.44	(J/K)
	chromite	hercynite	magnetite	spinel	ulvospinel
	0	17.65	10.37	71.02	0.96
Total	solids	mass	=	78.75	(gm)	density	=	3.04	(gm/cc)
	G	=	-1.2742e+06	(J)	H	=	-1.01572e+06	(J)	S	=	185.53	(J/K)	V	=	25.88	(cc)	Cp	=	96.42	(J/K)
Viscosity	of	the	System	cannot	be	computed.
System	mass	=	100.1	(gm)	density	=	2.93	(gm/cc)
	G	=	-1.61934e+06	(J)	H	=	-1.27742e+06	(J)	S	=	245.43	(J/K)	V	=	34.21	(cc)	Cp	=	127.44	(J/K)
Oxygen	delta	moles	=	0.000122862	delta	grams	=	0.00393145
	G	=	-39.2	(J)	H	=	4.51	(J)	S	=	0.03	(J/K)	V	=	14.23	(cc)	Cp	=	0	(J/K)
**********----------**********
Title:	Dummy	Title
T	=	1110	(C)	P	=	5	(kbars)	log(10)	f	O2	=	-8.98	delta	HM	=	-5.22	NNO	=	-0.32	QFM	=	0	COH	=	1.88	IW	=	3.95
Constraint	Flags:	fO2	path	=	QFM
Liquid	mass	=	19.67	(gm)	density	=	2.55	(gm/cc)	viscosity	=	2.53	(log	10	poise)	(analysis	in	wt	%)
	G	=	-318369	(J)	H	=	-241859	(J)	S	=	55.32	(J/K)	V	=	7.72	(cc)	Cp	=	28.57	(J/K)
	SiO2	TiO2	Al2O3	Fe2O3	Cr2O3	FeO	MnO	MgO	NiO	CoO	CaO	Na2O	K2O	P2O5	H2O	CO2	SO3	Cl2O-1	F2O-1
	50.54	0.47	21.43	1.41	0	7.33	0.76	3.39	0	0	5.77	5.86	0.5	0	2.54	0	0	0	0
orthopyroxene	mass	=	36.35	(gm)	density	=	3.3	(gm/cc)	(analysis	in	mole	%)
	opx	Na0.00Ca0.06Fe''0.39Mg1.43Fe'''0.03Ti0.00Al0.19Si1.89O6
	G	=	-567911	(J)	H	=	-450050	(J)	S	=	85.21	(J/K)	V	=	11.02	(cc)	Cp	=	45.02	(J/K)
	diopside	clinoenstatit	hedenbergite	alumino-buffo	buffonite	essenite	jadeite
	-44.64	93.8	39.21	8.28	-7.49	10.53	0.3
clinopyroxene	mass	=	11.98	(gm)	density	=	3.28	(gm/cc)	(analysis	in	mole	%)
	cpx	Na0.03Ca0.71Fe''0.23Mg0.82Fe'''0.06Ti0.01Al0.32Si1.81O6
	G	=	-188580	(J)	H	=	-150686	(J)	S	=	27.4	(J/K)	V	=	3.65	(cc)	Cp	=	14.1	(J/K)
	diopside	clinoenstatit	hedenbergite	alumino-buffo	buffonite	essenite	jadeite
	29.78	25.46	22.58	13.16	-10.23	16.19	3.05
feldspar	mass	=	29.91	(gm)	density	=	2.68	(gm/cc)	(analysis	in	mole	%)
	K0.00Na0.29Ca0.71Al1.71Si2.29O8
	G	=	-508891	(J)	H	=	-410486	(J)	S	=	71.15	(J/K)	V	=	11.17	(cc)	Cp	=	36.54	(J/K)
	albite	anorthite	sanidine
	28.67	71.09	0.24
spinel	mass	=	2.19	(gm)	density	=	3.81	(gm/cc)	(analysis	in	mole	%)
	Fe''0.30Mg0.71Fe'''0.21Al1.77Cr0.00Ti0.01O4
	G	=	-33140.5	(J)	H	=	-26219.7	(J)	S	=	5	(J/K)	V	=	0.58	(cc)	Cp	=	2.65	(J/K)
	chromite	hercynite	magnetite	spinel	ulvospinel
	0	18	10.5	70.5	1
Total	solids	mass	=	80.43	(gm)	density	=	3.04	(gm/cc)
	G	=	-1.29852e+06	(J)	H	=	-1.03744e+06	(J)	S	=	188.76	(J/K)	V	=	26.42	(cc)	Cp	=	98.31	(J/K)
Viscosity	of	the	System	cannot	be	computed.
System	mass	=	100.1	(gm)	density	=	2.93	(gm/cc)
	G	=	-1.61689e+06	(J)	H	=	-1.2793e+06	(J)	S	=	244.07	(J/K)	V	=	34.14	(cc)	Cp	=	126.88	(J/K)
Oxygen	delta	moles	=	0.000125017	delta	grams	=	0.00400041
	G	=	-39.57	(J)	H	=	4.54	(J)	S	=	0.03	(J/K)	V	=	14.38	(cc)	Cp	=	0	(J/K)
**********----------**********
Title:	Dummy	Title
T	=	1100	(C)	P	=	5	(kbars)	log(10)	f	O2	=	-9.11	delta	HM	=	-5.22	NNO	=	-0.31	QFM	=	0	COH	=	1.87	IW	=	3.96
Constraint	Flags:	fO2	path	=	QFM
Liquid	mass	=	18.18	(gm)	density	=	2.53	(gm/cc)	viscosity	=	2.56	(log	10	poise)	(analysis	in	wt	%)
	G	=	-294631	(J)	H	=	-224252	(J)	S	=	51.25	(J/K)	V	=	7.18	(cc)	Cp	=	26.4	(J/K)
	SiO2	TiO2	Al2O3	Fe2O3	Cr2O3	FeO	MnO	MgO	NiO	CoO	CaO	Na2O	K2O	P2O5	H2O	CO2	SO3	Cl2O-1	F2O-1
	50.79	0.45	21.52	1.37	0	7.03	0.83	3.16	0	0	5.52	6.04	0.53	0	2.75	0	0	0	0
orthopyroxene	mass	=	36.67	(gm)	density	=	3.3	(gm/cc)	(analysis	in	mole	%)
	opx	Na0.00Ca0.06Fe''0.40Mg1.43Fe'''0.03Ti0.00Al0.19Si1.89O6
	G	=	-571328	(J)	H	=	-453758	(J)	S	=	85.62	(J/K)	V	=	11.11	(cc)	Cp	=	45.35	(J/K)
	diopside	clinoenstatit	hedenbergite	alumino-buffo	buffonite	essenite	jadeite
	-45.34	93.88	39.89	8.27	-7.46	10.46	0.31
clinopyroxene	mass	=	12.29	(gm)	density	=	3.29	(gm/cc)	(analysis	in	mole	%)
	cpx	Na0.03Ca0.72Fe''0.22Mg0.81Fe'''0.06Ti0.02Al0.33Si1.81O6
	G	=	-193215	(J)	H	=	-154779	(J)	S	=	27.99	(J/K)	V	=	3.74	(cc)	Cp	=	14.44	(J/K)
	diopside	clinoenstatit	hedenbergite	alumino-buffo	buffonite	essenite	jadeite
	30.67	24.45	22.42	13.31	-10.14	16.14	3.16
feldspar	mass	=	30.59	(gm)	density	=	2.68	(gm/cc)	(analysis	in	mole	%)
	K0.00Na0.29Ca0.70Al1.70Si2.30O8
	G	=	-519739	(J)	H	=	-420136	(J)	S	=	72.54	(J/K)	V	=	11.43	(cc)	Cp	=	37.34	(J/K)
	albite	anorthite	sanidine
	29.46	70.29	0.25
spinel	mass	=	2.36	(gm)	density	=	3.82	(gm/cc)	(analysis	in	mole	%)
	Fe''0.31Mg0.70Fe'''0.21Al1.77Cr0.00Ti0.01O4
	G	=	-35540.8	(J)	H	=	-28175.6	(J)	S	=	5.36	(J/K)	V	=	0.62	(cc)	Cp	=	2.85	(J/K)
	chromite	hercynite	magnetite	spinel	ulvospinel
	0	18.33	10.58	70.06	1.03
Total	solids	mass	=	81.92	(gm)	density	=	3.05	(gm/cc)
	G	=	-1.31982e+06	(J)	H	=	-1.05685e+06	(J)	S	=	191.51	(J/K)	V	=	26.9	(cc)	Cp	=	99.98	(J/K)
Viscosity	of	the	System	cannot	be	computed.
System	mass	=	100.1	(gm)	density	=	2.94	(gm/cc)
	G	=	-1.61445e+06	(J)	H	=	-1.2811e+06	(J)	S	=	242.77	(J/K)	V	=	34.08	(cc)	Cp	=	126.38	(J/K)
Oxygen	delta	moles	=	0.000119763	delta	grams	=	0.00383229
	G	=	-37.6	(J)	H	=	4.31	(J)	S	=	0.03	(J/K)	V	=	13.67	(cc)	Cp	=	0	(J/K)
**********----------**********
Title:	Dummy	Title
T	=	1090	(C)	P	=	5	(kbars)	log(10)	f	O2	=	-9.24	delta	HM	=	-5.22	NNO	=	-0.31	QFM	=	0	COH	=	1.85	IW	=	3.98
Constraint	Flags:	fO2	path	=	QFM
Liquid	mass	=	16.85	(gm)	density	=	2.52	(gm/cc)	viscosity	=	2.58	(log	10	poise)	(analysis	in	wt	%)
	G	=	-273477	(J)	H	=	-208545	(J)	S	=	47.63	(J/K)	V	=	6.69	(cc)	Cp	=	24.47	(J/K)
	SiO2	TiO2	Al2O3	Fe2O3	Cr2O3	FeO	MnO	MgO	NiO	CoO	CaO	Na2O	K2O	P2O5	H2O	CO2	SO3	Cl2O-1	F2O-1
	51.02	0.44	21.61	1.33	0	6.73	0.89	2.95	0	0	5.28	6.22	0.57	0	2.97	0	0	0	0
orthopyroxene	mass	=	36.96	(gm)	density	=	3.3	(gm/cc)	(analysis	in	mole	%)
	opx	Na0.00Ca0.06Fe''0.41Mg1.42Fe'''0.03Ti0.00Al0.19Si1.89O6
	G	=	-574183	(J)	H	=	-457046	(J)	S	=	85.93	(J/K)	V	=	11.19	(cc)	Cp	=	45.63	(J/K)
	diopside	clinoenstatit	hedenbergite	alumino-buffo	buffonite	essenite	jadeite
	-45.98	93.95	40.51	8.25	-7.43	10.39	0.31
clinopyroxene	mass	=	12.56	(gm)	density	=	3.29	(gm/cc)	(analysis	in	mole	%)
	cpx	Na0.03Ca0.73Fe''0.22Mg0.80Fe'''0.06Ti0.02Al0.33Si1.81O6
	G	=	-197069	(J)	H	=	-158264	(J)	S	=	28.47	(J/K)	V	=	3.82	(cc)	Cp	=	14.72	(J/K)
	diopside	clinoenstatit	hedenbergite	alumino-buffo	buffonite	essenite	jadeite
	31.54	23.49	22.24	13.45	-10.06	16.07	3.27
feldspar	mass	=	31.21	(gm)	density	=	2.68	(gm/cc)	(analysis	in	mole	%)
	K0.00Na0.30Ca0.70Al1.70Si2.30O8
	G	=	-529566	(J)	H	=	-429000	(J)	S	=	73.77	(J/K)	V	=	11.67	(cc)	Cp	=	38.07	(J/K)
	albite	anorthite	sanidine
	30.2	69.53	0.27
spinel	mass	=	2.51	(gm)	density	=	3.82	(gm/cc)	(analysis	in	mole	%)
	Fe''0.31Mg0.70Fe'''0.21Al1.77Cr0.00Ti0.01O4
	G	=	-37732.3	(J)	H	=	-29977.4	(J)	S	=	5.69	(J/K)	V	=	0.66	(cc)	Cp	=	3.03	(J/K)
	chromite	hercynite	magnetite	spinel	ulvospinel
	0	18.64	10.63	69.68	1.05
Total	solids	mass	=	83.25	(gm)	density	=	3.05	(gm/cc)
	G	=	-1.33855e+06	(J)	H	=	-1.07429e+06	(J)	S	=	193.86	(J/K)	V	=	27.33	(cc)	Cp	=	101.45	(J/K)
Viscosity	of	the	System	cannot	be	computed.
System	mass	=	100.1	(gm)	density	=	2.94	(gm/cc)
	G	=	-1.61203e+06	(J)	H	=	-1.28283e+06	(J)	S	=	241.49	(J/K)	V	=	34.02	(cc)	Cp	=	125.92	(J/K)
Oxygen	delta	moles	=	0.000107459	delta	grams	=	0.00343855
	G	=	-33.46	(J)	H	=	3.83	(J)	S	=	0.03	(J/K)	V	=	12.18	(cc)	Cp	=	0	(J/K)
**********----------**********
Title:	Dummy	Title
T	=	1080	(C)	P	=	5	(kbars)	log(10)	f	O2	=	-9.37	delta	HM	=	-5.22	NNO	=	-0.3	QFM	=	0	COH	=	1.84	IW	=	3.99
Constraint	Flags:	fO2	path	=	QFM
Liquid	mass	=	15.66	(gm)	density	=	2.5	(gm/cc)	viscosity	=	2.6	(log	10	poise)	(analysis	in	wt	%)
	G	=	-254533	(J)	H	=	-194463	(J)	S	=	44.39	(J/K)	V	=	6.26	(cc)	Cp	=	22.74	(J/K)
	SiO2	TiO2	Al2O3	Fe2O3	Cr2O3	FeO	MnO	MgO	NiO	CoO	CaO	Na2O	K2O	P2O5	H2O	CO2	SO3	Cl2O-1	F2O-1
	51.22	0.42	21.69	1.29	0	6.42	0.96	2.76	0	0	5.06	6.38	0.6	0	3.19	0	0	0	0
orthopyroxene	mass	=	37.22	(gm)	density	=	3.31	(gm/cc)	(analysis	in	mole	%)
	opx	Na0.00Ca0.06Fe''0.41Mg1.42Fe'''0.03Ti0.00Al0.19Si1.89O6
	G	=	-576528	(J)	H	=	-459952	(J)	S	=	86.15	(J/K)	V	=	11.25	(cc)	Cp	=	45.87	(J/K)
	diopside	clinoenstatit	hedenbergite	alumino-buffo	buffonite	essenite	jadeite
	-46.57	94.03	41.09	8.23	-7.4	10.31	0.31
clinopyroxene	mass	=	12.78	(gm)	density	=	3.29	(gm/cc)	(analysis	in	mole	%)
	cpx	Na0.03Ca0.74Fe''0.22Mg0.79Fe'''0.06Ti0.02Al0.33Si1.80O6
	G	=	-200310	(J)	H	=	-161274	(J)	S	=	28.85	(J/K)	V	=	3.89	(cc)	Cp	=	14.96	(J/K)
	diopside	clinoenstatit	hedenbergite	alumino-buffo	buffonite	essenite	jadeite
	32.4	22.58	22.05	13.58	-9.98	15.99	3.37
feldspar	mass	=	31.79	(gm)	density	=	2.67	(gm/cc)	(analysis	in	mole	%)
	K0.00Na0.31Ca0.69Al1.69Si2.31O8
	G	=	-538493	(J)	H	=	-437171	(J)	S	=	74.88	(J/K)	V	=	11.88	(cc)	Cp	=	38.73	(J/K)
	albite	anorthite	sanidine
	30.91	68.8	0.29
spinel	mass	=	2.66	(gm)	density	=	3.82	(gm/cc)	(analysis	in	mole	%)
	Fe''0.32Mg0.69Fe'''0.21Al1.77Cr0.00Ti0.01O4
	G	=	-39742.1	(J)	H	=	-31645.8	(J)	S	=	5.98	(J/K)	V	=	0.69	(cc)	Cp	=	3.19	(J/K)
	chromite	hercynite	magnetite	spinel	ulvospinel
	0	18.93	10.64	69.37	1.06
Total	solids	mass	=	84.44	(gm)	density	=	3.05	(gm/cc)
	G	=	-1.35507e+06	(J)	H	=	-1.09004e+06	(J)	S	=	195.86	(J/K)	V	=	27.71	(cc)	Cp	=	102.76	(J/K)
Viscosity	of	the	System	cannot	be	computed.
System	mass	=	100.1	(gm)	density	=	2.95	(gm/cc)
	G	=	-1.60961e+06	(J)	H	=	-1.28451e+06	(J)	S	=	240.25	(J/K)	V	=	33.97	(cc)	Cp	=	125.5	(J/K)
Oxygen	delta	moles	=	8.85316e-05	delta	grams	=	0.0028329
	G	=	-27.34	(J)	H	=	3.12	(J)	S	=	0.02	(J/K)	V	=	9.96	(cc)	Cp	=	0	(J/K)
**********----------**********
Title:	Dummy	Title
T	=	1070	(C)	P	=	5	(kbars)	log(10)	f	O2	=	-9.5	delta	HM	=	-5.22	NNO	=	-0.3	QFM	=	0	COH	=	1.83	IW	=	4.01
Constraint	Flags:	fO2	path	=	QFM
Liquid	mass	=	14.59	(gm)	density	=	2.49	(gm/cc)	viscosity	=	2.61	(log	10	poise)	(analysis	in	wt	%)
	G	=	-237491	(J)	H	=	-181780	(J)	S	=	41.48	(J/K)	V	=	5.87	(cc)	Cp	=	21.2	(J/K)
	SiO2	TiO2	Al2O3	Fe2O3	Cr2O3	FeO	MnO	MgO	NiO	CoO	CaO	Na2O	K2O	P2O5	H2O	CO2	SO3	Cl2O-1	F2O-1
	51.4	0.4	21.78	1.25	0	6.12	1.03	2.59	0	0	4.85	6.52	0.64	0	3.43	0	0	0	0
orthopyroxene	mass	=	37.43	(gm)	density	=	3.31	(gm/cc)	(analysis	in	mole	%)
	opx	Na0.00Ca0.06Fe''0.42Mg1.42Fe'''0.03Ti0.00Al0.19Si1.89O6
	G	=	-578419	(J)	H	=	-462515	(J)	S	=	86.29	(J/K)	V	=	11.31	(cc)	Cp	=	46.08	(J/K)
	diopside	clinoenstatit	hedenbergite	alumino-buffo	buffonite	essenite	jadeite
	-47.11	94.11	41.62	8.21	-7.37	10.23	0.32
clinopyroxene	mass	=	12.97	(gm)	density	=	3.29	(gm/cc)	(analysis	in	mole	%)
	cpx	Na0.03Ca0.75Fe''0.22Mg0.79Fe'''0.06Ti0.02Al0.33Si1.80O6
	G	=	-203071	(J)	H	=	-163910	(J)	S	=	29.16	(J/K)	V	=	3.94	(cc)	Cp	=	15.16	(J/K)
	diopside	clinoenstatit	hedenbergite	alumino-buffo	buffonite	essenite	jadeite
	33.24	21.72	21.84	13.71	-9.9	15.91	3.47
feldspar	mass	=	32.31	(gm)	density	=	2.67	(gm/cc)	(analysis	in	mole	%)
	K0.00Na0.32Ca0.68Al1.68Si2.32O8
	G	=	-546622	(J)	H	=	-444727	(J)	S	=	75.86	(J/K)	V	=	12.08	(cc)	Cp	=	39.33	(J/K)
	albite	anorthite	sanidine
	31.59	68.1	0.3
spinel	mass	=	2.79	(gm)	density	=	3.83	(gm/cc)	(analysis	in	mole	%)
	Fe''0.32Mg0.69Fe'''0.21Al1.77Cr0.00Ti0.01O4
	G	=	-41593.4	(J)	H	=	-33198.6	(J)	S	=	6.25	(J/K)	V	=	0.73	(cc)	Cp	=	3.35	(J/K)
	chromite	hercynite	magnetite	spinel	ulvospinel
	0	19.19	10.62	69.12	1.06
Total	solids	mass	=	85.5	(gm)	density	=	3.05	(gm/cc)
	G	=	-1.36971e+06	(J)	H	=	-1.10435e+06	(J)	S	=	197.56	(J/K)	V	=	28.06	(cc)	Cp	=	103.92	(J/K)
Viscosity	of	the	System	cannot	be	computed.
System	mass	=	100.1	(gm)	density	=	2.95	(gm/cc)
	G	=	-1.6072e+06	(J)	H	=	-1.28613e+06	(J)	S	=	239.04	(J/K)	V	=	33.93	(cc)	Cp	=	125.12	(J/K)
Oxygen	delta	moles	=	6.3446e-05	delta	grams	=	0.0020302
	G	=	-19.43	(J)	H	=	2.21	(J)	S	=	0.02	(J/K)	V	=	7.09	(cc)	Cp	=	0	(J/K)
**********----------**********
Title:	Dummy	Title
T	=	1060	(C)	P	=	5	(kbars)	log(10)	f	O2	=	-9.63	delta	HM	=	-5.22	NNO	=	-0.29	QFM	=	0	COH	=	1.81	IW	=	4.03
Constraint	Flags:	fO2	path	=	QFM
Liquid	mass	=	13.63	(gm)	density	=	2.47	(gm/cc)	viscosity	=	2.61	(log	10	poise)	(analysis	in	wt	%)
	G	=	-222091	(J)	H	=	-170303	(J)	S	=	38.85	(J/K)	V	=	5.51	(cc)	Cp	=	19.81	(J/K)
	SiO2	TiO2	Al2O3	Fe2O3	Cr2O3	FeO	MnO	MgO	NiO	CoO	CaO	Na2O	K2O	P2O5	H2O	CO2	SO3	Cl2O-1	F2O-1
	51.55	0.38	21.86	1.21	0	5.82	1.1	2.42	0	0	4.65	6.66	0.67	0	3.67	0	0	0	0
orthopyroxene	mass	=	37.63	(gm)	density	=	3.31	(gm/cc)	(analysis	in	mole	%)
	opx	Na0.00Ca0.05Fe''0.42Mg1.41Fe'''0.03Ti0.00Al0.19Si1.89O6
	G	=	-579908	(J)	H	=	-464773	(J)	S	=	86.36	(J/K)	V	=	11.35	(cc)	Cp	=	46.24	(J/K)
	diopside	clinoenstatit	hedenbergite	alumino-buffo	buffonite	essenite	jadeite
	-47.62	94.19	42.12	8.18	-7.35	10.15	0.32
clinopyroxene	mass	=	13.14	(gm)	density	=	3.29	(gm/cc)	(analysis	in	mole	%)
	cpx	Na0.04Ca0.76Fe''0.22Mg0.78Fe'''0.06Ti0.02Al0.33Si1.80O6
	G	=	-205452	(J)	H	=	-166250	(J)	S	=	29.41	(J/K)	V	=	3.99	(cc)	Cp	=	15.34	(J/K)
	diopside	clinoenstatit	hedenbergite	alumino-buffo	buffonite	essenite	jadeite
	34.06	20.91	21.63	13.84	-9.83	15.82	3.57
feldspar	mass	=	32.79	(gm)	density	=	2.67	(gm/cc)	(analysis	in	mole	%)
	K0.00Na0.32Ca0.67Al1.67Si2.33O8
	G	=	-554039	(J)	H	=	-451735	(J)	S	=	76.74	(J/K)	V	=	12.27	(cc)	Cp	=	39.88	(J/K)
	albite	anorthite	sanidine
	32.24	67.44	0.32
spinel	mass	=	2.9	(gm)	density	=	3.83	(gm/cc)	(analysis	in	mole	%)
	Fe''0.32Mg0.69Fe'''0.21Al1.77Cr0.00Ti0.01O4
	G	=	-43305.9	(J)	H	=	-34650.7	(J)	S	=	6.49	(J/K)	V	=	0.76	(cc)	Cp	=	3.49	(J/K)
	chromite	hercynite	magnetite	spinel	ulvospinel
	0	19.45	10.58	68.92	1.06
Total	solids	mass	=	86.47	(gm)	density	=	3.05	(gm/cc)
	G	=	-1.3827e+06	(J)	H	=	-1.11741e+06	(J)	S	=	199	(J/K)	V	=	28.37	(cc)	Cp	=	104.95	(J/K)
Viscosity	of	the	System	cannot	be	computed.
System	mass	=	100.09	(gm)	density	=	2.95	(gm/cc)
	G	=	-1.6048e+06	(J)	H	=	-1.28771e+06	(J)	S	=	237.85	(J/K)	V	=	33.88	(cc)	Cp	=	124.76	(J/K)
Oxygen	delta	moles	=	3.26766e-05	delta	grams	=	0.00104561
	G	=	-9.93	(J)	H	=	1.13	(J)	S	=	0.01	(J/K)	V	=	3.62	(cc)	Cp	=	0	(J/K)
**********----------**********
Title:	Dummy	Title
T	=	1050	(C)	P	=	5	(kbars)	log(10)	f	O2	=	-9.77	delta	HM	=	-5.22	NNO	=	-0.29	QFM	=	0	COH	=	1.8	IW	=	4.04
Constraint	Flags:	fO2	path	=	QFM
Liquid	mass	=	12.75	(gm)	density	=	2.46	(gm/cc)	viscosity	=	2.61	(log	10	poise)	(analysis	in	wt	%)
	G	=	-208114	(J)	H	=	-159871	(J)	S	=	36.46	(J/K)	V	=	5.19	(cc)	Cp	=	18.55	(J/K)
	SiO2	TiO2	Al2O3	Fe2O3	Cr2O3	FeO	MnO	MgO	NiO	CoO	CaO	Na2O	K2O	P2O5	H2O	CO2	SO3	Cl2O-1	F2O-1
	51.68	0.36	21.94	1.16	0	5.54	1.18	2.28	0	0	4.47	6.78	0.71	0	3.92	0	0	0	0
orthopyroxene	mass	=	37.79	(gm)	density	=	3.32	(gm/cc)	(analysis	in	mole	%)
	opx	Na0.00Ca0.05Fe''0.43Mg1.41Fe'''0.03Ti0.00Al0.19Si1.89O6
	G	=	-581044	(J)	H	=	-466761	(J)	S	=	86.37	(J/K)	V	=	11.39	(cc)	Cp	=	46.38	(J/K)
	diopside	clinoenstatit	hedenbergite	alumino-buffo	buffonite	essenite	jadeite
	-48.09	94.27	42.59	8.16	-7.32	10.07	0.32
clinopyroxene	mass	=	13.29	(gm)	density	=	3.29	(gm/cc)	(analysis	in	mole	%)
	cpx	Na0.04Ca0.76Fe''0.21Mg0.77Fe'''0.06Ti0.02Al0.33Si1.80O6
	G	=	-207530	(J)	H	=	-168355	(J)	S	=	29.61	(J/K)	V	=	4.04	(cc)	Cp	=	15.49	(J/K)
	diopside	clinoenstatit	hedenbergite	alumino-buffo	buffonite	essenite	jadeite
	34.87	20.14	21.42	13.96	-9.77	15.72	3.67
feldspar	mass	=	33.24	(gm)	density	=	2.67	(gm/cc)	(analysis	in	mole	%)
	K0.00Na0.33Ca0.67Al1.67Si2.33O8
	G	=	-560818	(J)	H	=	-458251	(J)	S	=	77.52	(J/K)	V	=	12.44	(cc)	Cp	=	40.39	(J/K)
	albite	anorthite	sanidine
	32.86	66.8	0.34
spinel	mass	=	3.02	(gm)	density	=	3.83	(gm/cc)	(analysis	in	mole	%)
	Fe''0.32Mg0.69Fe'''0.21Al1.77Cr0.00Ti0.01O4
	G	=	-44896.4	(J)	H	=	-36014.8	(J)	S	=	6.71	(J/K)	V	=	0.79	(cc)	Cp	=	3.62	(J/K)
	chromite	hercynite	magnetite	spinel	ulvospinel
	0	19.68	10.5	68.78	1.04
Total	solids	mass	=	87.34	(gm)	density	=	3.05	(gm/cc)
	G	=	-1.39429e+06	(J)	H	=	-1.12938e+06	(J)	S	=	200.21	(J/K)	V	=	28.65	(cc)	Cp	=	105.87	(J/K)
Viscosity	of	the	System	cannot	be	computed.
System	mass	=	100.09	(gm)	density	=	2.96	(gm/cc)
	G	=	-1.6024e+06	(J)	H	=	-1.28925e+06	(J)	S	=	236.67	(J/K)	V	=	33.84	(cc)	Cp	=	124.42	(J/K)
Oxygen	delta	moles	=	-3.31061e-06	delta	grams	=	-0.000105936
	G	=	1	(J)	H	=	-0.11	(J)	S	=	0	(J/K)	V	=	-0.36	(cc)	Cp	=	0	(J/K)
**********----------**********
Title:	Dummy	Title
T	=	1040	(C)	P	=	5	(kbars)	log(10)	f	O2	=	-9.9	delta	HM	=	-5.22	NNO	=	-0.28	QFM	=	0	COH	=	1.78	IW	=	4.06
Constraint	Flags:	fO2	path	=	QFM
Liquid	mass	=	11.96	(gm)	density	=	2.45	(gm/cc)	viscosity	=	2.61	(log	10	poise)	(analysis	in	wt	%)
	G	=	-195376	(J)	H	=	-150350	(J)	S	=	34.29	(J/K)	V	=	4.89	(cc)	Cp	=	17.41	(J/K)
	SiO2	TiO2	Al2O3	Fe2O3	Cr2O3	FeO	MnO	MgO	NiO	CoO	CaO	Na2O	K2O	P2O5	H2O	CO2	SO3	Cl2O-1	F2O-1
	51.77	0.34	22.02	1.12	0	5.26	1.25	2.14	0	0	4.29	6.89	0.75	0	4.18	0	0	0	0
orthopyroxene	mass	=	37.93	(gm)	density	=	3.32	(gm/cc)	(analysis	in	mole	%)
	opx	Na0.00Ca0.05Fe''0.43Mg1.41Fe'''0.03Ti0.00Al0.18Si1.89O6
	G	=	-581872	(J)	H	=	-468513	(J)	S	=	86.33	(J/K)	V	=	11.43	(cc)	Cp	=	46.49	(J/K)
	diopside	clinoenstatit	hedenbergite	alumino-buffo	buffonite	essenite	jadeite
	-48.53	94.36	43.03	8.14	-7.3	9.99	0.32
clinopyroxene	mass	=	13.42	(gm)	density	=	3.3	(gm/cc)	(analysis	in	mole	%)
	cpx	Na0.04Ca0.77Fe''0.21Mg0.77Fe'''0.06Ti0.02Al0.33Si1.80O6
	G	=	-209364	(J)	H	=	-170271	(J)	S	=	29.77	(J/K)	V	=	4.07	(cc)	Cp	=	15.62	(J/K)
	diopside	clinoenstatit	hedenbergite	alumino-buffo	buffonite	essenite	jadeite
	35.66	19.41	21.2	14.07	-9.71	15.62	3.76
feldspar	mass	=	33.66	(gm)	density	=	2.67	(gm/cc)	(analysis	in	mole	%)
	K0.00Na0.33Ca0.66Al1.66Si2.34O8
	G	=	-567028	(J)	H	=	-464326	(J)	S	=	78.21	(J/K)	V	=	12.59	(cc)	Cp	=	40.85	(J/K)
	albite	anorthite	sanidine
	33.44	66.2	0.36
spinel	mass	=	3.12	(gm)	density	=	3.83	(gm/cc)	(analysis	in	mole	%)
	Fe''0.32Mg0.69Fe'''0.21Al1.77Cr0.00Ti0.01O4
	G	=	-46379	(J)	H	=	-37301.4	(J)	S	=	6.91	(J/K)	V	=	0.81	(cc)	Cp	=	3.74	(J/K)
	chromite	hercynite	magnetite	spinel	ulvospinel
	0	19.9	10.4	68.68	1.02
Total	solids	mass	=	88.13	(gm)	density	=	3.05	(gm/cc)
	G	=	-1.40464e+06	(J)	H	=	-1.14041e+06	(J)	S	=	201.22	(J/K)	V	=	28.91	(cc)	Cp	=	106.7	(J/K)
Viscosity	of	the	System	cannot	be	computed.
System	mass	=	100.09	(gm)	density	=	2.96	(gm/cc)
	G	=	-1.60002e+06	(J)	H	=	-1.29076e+06	(J)	S	=	235.51	(J/K)	V	=	33.8	(cc)	Cp	=	124.11	(J/K)
Oxygen	delta	moles	=	-4.40693e-05	delta	grams	=	-0.00141016
	G	=	13.16	(J)	H	=	-1.49	(J)	S	=	-0.01	(J/K)	V	=	-4.81	(cc)	Cp	=	0	(J/K)
**********----------**********
Title:	Dummy	Title
T	=	1030	(C)	P	=	5	(kbars)	log(10)	f	O2	=	-10.04	delta	HM	=	-5.22	NNO	=	-0.27	QFM	=	0	COH	=	1.77	IW	=	4.08
Constraint	Flags:	fO2	path	=	QFM
Liquid	mass	=	11.23	(gm)	density	=	2.43	(gm/cc)	viscosity	=	2.6	(log	10	poise)	(analysis	in	wt	%)
	G	=	-183721	(J)	H	=	-141624	(J)	S	=	32.3	(J/K)	V	=	4.62	(cc)	Cp	=	16.36	(J/K)
	SiO2	TiO2	Al2O3	Fe2O3	Cr2O3	FeO	MnO	MgO	NiO	CoO	CaO	Na2O	K2O	P2O5	H2O	CO2	SO3	Cl2O-1	F2O-1
	51.84	0.32	22.09	1.08	0	4.99	1.34	2.01	0	0	4.12	6.98	0.78	0	4.45	0	0	0	0
orthopyroxene	mass	=	38.06	(gm)	density	=	3.32	(gm/cc)	(analysis	in	mole	%)
	opx	Na0.00Ca0.05Fe''0.43Mg1.40Fe'''0.03Ti0.00Al0.18Si1.89O6
	G	=	-582433	(J)	H	=	-470059	(J)	S	=	86.23	(J/K)	V	=	11.46	(cc)	Cp	=	46.58	(J/K)
	diopside	clinoenstatit	hedenbergite	alumino-buffo	buffonite	essenite	jadeite
	-48.95	94.44	43.45	8.11	-7.28	9.91	0.32
clinopyroxene	mass	=	13.54	(gm)	density	=	3.3	(gm/cc)	(analysis	in	mole	%)
	cpx	Na0.04Ca0.77Fe''0.21Mg0.76Fe'''0.06Ti0.02Al0.34Si1.80O6
	G	=	-211000	(J)	H	=	-172032	(J)	S	=	29.9	(J/K)	V	=	4.11	(cc)	Cp	=	15.74	(J/K)
	diopside	clinoenstatit	hedenbergite	alumino-buffo	buffonite	essenite	jadeite
	36.43	18.71	20.98	14.18	-9.66	15.51	3.85
feldspar	mass	=	34.04	(gm)	density	=	2.67	(gm/cc)	(analysis	in	mole	%)
	K0.00Na0.34Ca0.66Al1.66Si2.34O8
	G	=	-572725	(J)	H	=	-470007	(J)	S	=	78.82	(J/K)	V	=	12.74	(cc)	Cp	=	41.45	(J/K)
	albite	anorthite	sanidine
	34	65.62	0.38
spinel	mass	=	3.21	(gm)	density	=	3.83	(gm/cc)	(analysis	in	mole	%)
	Fe''0.32Mg0.69Fe'''0.21Al1.77Cr0.00Ti0.01O4
	G	=	-47765.8	(J)	H	=	-38519.5	(J)	S	=	7.1	(J/K)	V	=	0.84	(cc)	Cp	=	3.85	(J/K)
	chromite	hercynite	magnetite	spinel	ulvospinel
	0	20.1	10.28	68.62	1
Total	solids	mass	=	88.86	(gm)	density	=	3.05	(gm/cc)
	G	=	-1.41392e+06	(J)	H	=	-1.15062e+06	(J)	S	=	202.05	(J/K)	V	=	29.14	(cc)	Cp	=	107.62	(J/K)
Viscosity	of	the	System	cannot	be	computed.
System	mass	=	100.09	(gm)	density	=	2.96	(gm/cc)
	G	=	-1.59765e+06	(J)	H	=	-1.29224e+06	(J)	S	=	234.36	(J/K)	V	=	33.76	(cc)	Cp	=	123.99	(J/K)
Oxygen	delta	moles	=	-8.91775e-05	delta	grams	=	-0.00285357
	G	=	26.41	(J)	H	=	-2.98	(J)	S	=	-0.02	(J/K)	V	=	-9.66	(cc)	Cp	=	0	(J/K)
**********----------**********
Title:	Dummy	Title
T	=	1020	(C)	P	=	5	(kbars)	log(10)	f	O2	=	-10.19	delta	HM	=	-5.22	NNO	=	-0.27	QFM	=	0	COH	=	1.75	IW	=	4.09
Constraint	Flags:	fO2	path	=	QFM
Liquid	mass	=	10.57	(gm)	density	=	2.42	(gm/cc)	viscosity	=	2.58	(log	10	poise)	(analysis	in	wt	%)
	G	=	-173013	(J)	H	=	-133592	(J)	S	=	30.48	(J/K)	V	=	4.37	(cc)	Cp	=	15.41	(J/K)
	SiO2	TiO2	Al2O3	Fe2O3	Cr2O3	FeO	MnO	MgO	NiO	CoO	CaO	Na2O	K2O	P2O5	H2O	CO2	SO3	Cl2O-1	F2O-1
	51.88	0.3	22.16	1.04	0	4.73	1.42	1.89	0	0	3.96	7.07	0.82	0	4.73	0	0	0	0
orthopyroxene	mass	=	38.17	(gm)	density	=	3.32	(gm/cc)	(analysis	in	mole	%)
	opx	Na0.00Ca0.05Fe''0.44Mg1.40Fe'''0.03Ti0.00Al0.18Si1.89O6
	G	=	-582762	(J)	H	=	-471425	(J)	S	=	86.1	(J/K)	V	=	11.48	(cc)	Cp	=	46.65	(J/K)
	diopside	clinoenstatit	hedenbergite	alumino-buffo	buffonite	essenite	jadeite
	-49.35	94.53	43.85	8.08	-7.27	9.83	0.32
clinopyroxene	mass	=	13.65	(gm)	density	=	3.3	(gm/cc)	(analysis	in	mole	%)
	cpx	Na0.04Ca0.78Fe''0.21Mg0.76Fe'''0.06Ti0.02Al0.34Si1.80O6
	G	=	-212474	(J)	H	=	-173667	(J)	S	=	30.01	(J/K)	V	=	4.14	(cc)	Cp	=	15.85	(J/K)
	diopside	clinoenstatit	hedenbergite	alumino-buffo	buffonite	essenite	jadeite
	37.18	18.05	20.76	14.29	-9.61	15.39	3.93
feldspar	mass	=	34.4	(gm)	density	=	2.67	(gm/cc)	(analysis	in	mole	%)
	K0.00Na0.35Ca0.65Al1.65Si2.35O8
	G	=	-577965	(J)	H	=	-475335	(J)	S	=	79.36	(J/K)	V	=	12.88	(cc)	Cp	=	41.85	(J/K)
	albite	anorthite	sanidine
	34.54	65.07	0.39
spinel	mass	=	3.3	(gm)	density	=	3.83	(gm/cc)	(analysis	in	mole	%)
	Fe''0.32Mg0.69Fe'''0.20Al1.78Cr0.00Ti0.01O4
	G	=	-49067.4	(J)	H	=	-39677	(J)	S	=	7.26	(J/K)	V	=	0.86	(cc)	Cp	=	3.95	(J/K)
	chromite	hercynite	magnetite	spinel	ulvospinel
	0	20.29	10.15	68.6	0.96
Total	solids	mass	=	89.52	(gm)	density	=	3.05	(gm/cc)
	G	=	-1.42227e+06	(J)	H	=	-1.1601e+06	(J)	S	=	202.73	(J/K)	V	=	29.36	(cc)	Cp	=	108.3	(J/K)
Viscosity	of	the	System	cannot	be	computed.
System	mass	=	100.09	(gm)	density	=	2.97	(gm/cc)
	G	=	-1595281	(J)	H	=	-1.2937e+06	(J)	S	=	233.22	(J/K)	V	=	33.72	(cc)	Cp	=	123.71	(J/K)
Oxygen	delta	moles	=	-0.000138233	delta	grams	=	-0.0044233
	G	=	40.59	(J)	H	=	-4.57	(J)	S	=	-0.03	(J/K)	V	=	-14.86	(cc)	Cp	=	0	(J/K)
**********----------**********
Title:	Dummy	Title
T	=	1010	(C)	P	=	5	(kbars)	log(10)	f	O2	=	-10.33	delta	HM	=	-5.22	NNO	=	-0.26	QFM	=	0	COH	=	1.74	IW	=	4.11
Constraint	Flags:	fO2	path	=	QFM
Liquid	mass	=	9.95	(gm)	density	=	2.41	(gm/cc)	viscosity	=	2.56	(log	10	poise)	(analysis	in	wt	%)
	G	=	-163137	(J)	H	=	-126172	(J)	S	=	28.81	(J/K)	V	=	4.13	(cc)	Cp	=	14.53	(J/K)
	SiO2	TiO2	Al2O3	Fe2O3	Cr2O3	FeO	MnO	MgO	NiO	CoO	CaO	Na2O	K2O	P2O5	H2O	CO2	SO3	Cl2O-1	F2O-1
	51.89	0.28	22.23	1	0	4.48	1.51	1.78	0	0	3.81	7.15	0.86	0	5.02	0	0	0	0
orthopyroxene	mass	=	38.26	(gm)	density	=	3.33	(gm/cc)	(analysis	in	mole	%)
	opx	Na0.00Ca0.05Fe''0.44Mg1.40Fe'''0.02Ti0.00Al0.18Si1.89O6
	G	=	-582892	(J)	H	=	-472636	(J)	S	=	85.93	(J/K)	V	=	11.5	(cc)	Cp	=	46.7	(J/K)
	diopside	clinoenstatit	hedenbergite	alumino-buffo	buffonite	essenite	jadeite
	-49.73	94.62	44.23	8.06	-7.25	9.75	0.32
clinopyroxene	mass	=	13.75	(gm)	density	=	3.3	(gm/cc)	(analysis	in	mole	%)
	cpx	Na0.04Ca0.79Fe''0.21Mg0.75Fe'''0.06Ti0.02Al0.34Si1.80O6
	G	=	-213811	(J)	H	=	-175196	(J)	S	=	30.09	(J/K)	V	=	4.17	(cc)	Cp	=	15.94	(J/K)
	diopside	clinoenstatit	hedenbergite	alumino-buffo	buffonite	essenite	jadeite
	37.92	17.42	20.53	14.39	-9.56	15.28	4.02
feldspar	mass	=	34.74	(gm)	density	=	2.67	(gm/cc)	(analysis	in	mole	%)
	K0.00Na0.35Ca0.65Al1.65Si2.35O8
	G	=	-582794	(J)	H	=	-480345	(J)	S	=	79.84	(J/K)	V	=	13	(cc)	Cp	=	42.22	(J/K)
	albite	anorthite	sanidine
	35.05	64.54	0.41
spinel	mass	=	3.39	(gm)	density	=	3.83	(gm/cc)	(analysis	in	mole	%)
	Fe''0.32Mg0.69Fe'''0.20Al1.78Cr0.00Ti0.01O4
	G	=	-50292.3	(J)	H	=	-40779.9	(J)	S	=	7.41	(J/K)	V	=	0.88	(cc)	Cp	=	4.05	(J/K)
	chromite	hercynite	magnetite	spinel	ulvospinel
	0	20.47	9.99	68.61	0.93
Total	solids	mass	=	90.14	(gm)	density	=	3.05	(gm/cc)
	G	=	-1.42979e+06	(J)	H	=	-1.16896e+06	(J)	S	=	203.27	(J/K)	V	=	29.56	(cc)	Cp	=	108.92	(J/K)
Viscosity	of	the	System	cannot	be	computed.
System	mass	=	100.09	(gm)	density	=	2.97	(gm/cc)
	G	=	-1.59293e+06	(J)	H	=	-1.29513e+06	(J)	S	=	232.08	(J/K)	V	=	33.69	(cc)	Cp	=	123.45	(J/K)
Oxygen	delta	moles	=	-0.000190875	delta	grams	=	-0.00610778
	G	=	55.57	(J)	H	=	-6.25	(J)	S	=	-0.05	(J/K)	V	=	-20.36	(cc)	Cp	=	-0.01	(J/K)
**********----------**********
Title:	Dummy	Title
T	=	1000	(C)	P	=	5	(kbars)	log(10)	f	O2	=	-10.48	delta	HM	=	-5.22	NNO	=	-0.25	QFM	=	0	COH	=	1.72	IW	=	4.13
Constraint	Flags:	fO2	path	=	QFM
Liquid	mass	=	9.39	(gm)	density	=	2.4	(gm/cc)	viscosity	=	2.54	(log	10	poise)	(analysis	in	wt	%)
	G	=	-153998	(J)	H	=	-119292	(J)	S	=	27.26	(J/K)	V	=	3.92	(cc)	Cp	=	13.72	(J/K)
	SiO2	TiO2	Al2O3	Fe2O3	Cr2O3	FeO	MnO	MgO	NiO	CoO	CaO	Na2O	K2O	P2O5	H2O	CO2	SO3	Cl2O-1	F2O-1
	51.87	0.26	22.3	0.96	0	4.24	1.6	1.68	0	0	3.67	7.21	0.89	0	5.33	0	0	0	0
orthopyroxene	mass	=	38.34	(gm)	density	=	3.33	(gm/cc)	(analysis	in	mole	%)
	opx	Na0.00Ca0.05Fe''0.45Mg1.40Fe'''0.02Ti0.00Al0.18Si1.90O6
	G	=	-582850	(J)	H	=	-473712	(J)	S	=	85.72	(J/K)	V	=	11.51	(cc)	Cp	=	46.74	(J/K)
	diopside	clinoenstatit	hedenbergite	alumino-buffo	buffonite	essenite	jadeite
	-50.1	94.71	44.6	8.03	-7.23	9.67	0.33
clinopyroxene	mass	=	13.84	(gm)	density	=	3.3	(gm/cc)	(analysis	in	mole	%)
	cpx	Na0.04Ca0.79Fe''0.20Mg0.75Fe'''0.06Ti0.02Al0.34Si1.80O6
	G	=	-215032	(J)	H	=	-176635	(J)	S	=	30.16	(J/K)	V	=	4.2	(cc)	Cp	=	16.03	(J/K)
	diopside	clinoenstatit	hedenbergite	alumino-buffo	buffonite	essenite	jadeite
	38.64	16.82	20.31	14.49	-9.52	15.16	4.1
feldspar	mass	=	35.05	(gm)	density	=	2.67	(gm/cc)	(analysis	in	mole	%)
	K0.00Na0.36Ca0.64Al1.64Si2.36O8
	G	=	-587253	(J)	H	=	-485070	(J)	S	=	80.26	(J/K)	V	=	13.12	(cc)	Cp	=	42.56	(J/K)
	albite	anorthite	sanidine
	35.53	64.03	0.43
spinel	mass	=	3.46	(gm)	density	=	3.83	(gm/cc)	(analysis	in	mole	%)
	Fe''0.32Mg0.69Fe'''0.20Al1.79Cr0.00Ti0.01O4
	G	=	-51447.8	(J)	H	=	-41833.6	(J)	S	=	7.55	(J/K)	V	=	0.9	(cc)	Cp	=	4.14	(J/K)
	chromite	hercynite	magnetite	spinel	ulvospinel
	0	20.63	9.82	68.65	0.89
Total	solids	mass	=	90.7	(gm)	density	=	3.05	(gm/cc)
	G	=	-1.43658e+06	(J)	H	=	-1.17725e+06	(J)	S	=	203.69	(J/K)	V	=	29.74	(cc)	Cp	=	109.47	(J/K)
Viscosity	of	the	System	cannot	be	computed.
System	mass	=	100.09	(gm)	density	=	2.97	(gm/cc)
	G	=	-1.59058e+06	(J)	H	=	-1.29654e+06	(J)	S	=	230.95	(J/K)	V	=	33.66	(cc)	Cp	=	123.19	(J/K)
Oxygen	delta	moles	=	-0.000246773	delta	grams	=	-0.00789644
	G	=	71.22	(J)	H	=	-7.99	(J)	S	=	-0.06	(J/K)	V	=	-26.12	(cc)	Cp	=	-0.01	(J/K)
**********----------**********
Title:	Dummy	Title
T	=	990	(C)	P	=	5	(kbars)	log(10)	f	O2	=	-10.62	delta	HM	=	-5.23	NNO	=	-0.25	QFM	=	0	COH	=	1.71	IW	=	4.15
Constraint	Flags:	fO2	path	=	QFM
Liquid	mass	=	8.86	(gm)	density	=	2.38	(gm/cc)	viscosity	=	2.5	(log	10	poise)	(analysis	in	wt	%)
	G	=	-145511	(J)	H	=	-112889	(J)	S	=	25.83	(J/K)	V	=	3.72	(cc)	Cp	=	12.97	(J/K)
	SiO2	TiO2	Al2O3	Fe2O3	Cr2O3	FeO	MnO	MgO	NiO	CoO	CaO	Na2O	K2O	P2O5	H2O	CO2	SO3	Cl2O-1	F2O-1
	51.82	0.24	22.37	0.92	0	4.01	1.69	1.58	0	0	3.53	7.27	0.93	0	5.64	0	0	0	0
orthopyroxene	mass	=	38.41	(gm)	density	=	3.33	(gm/cc)	(analysis	in	mole	%)
	opx	Na0.00Ca0.05Fe''0.45Mg1.40Fe'''0.02Ti0.00Al0.18Si1.90O6
	G	=	-582662	(J)	H	=	-474671	(J)	S	=	85.49	(J/K)	V	=	11.53	(cc)	Cp	=	46.76	(J/K)
	diopside	clinoenstatit	hedenbergite	alumino-buffo	buffonite	essenite	jadeite
	-50.46	94.8	44.97	8	-7.22	9.59	0.33
clinopyroxene	mass	=	13.93	(gm)	density	=	3.3	(gm/cc)	(analysis	in	mole	%)
	cpx	Na0.04Ca0.80Fe''0.20Mg0.74Fe'''0.06Ti0.03Al0.34Si1.80O6
	G	=	-216151	(J)	H	=	-177995	(J)	S	=	30.21	(J/K)	V	=	4.22	(cc)	Cp	=	16.11	(J/K)
	diopside	clinoenstatit	hedenbergite	alumino-buffo	buffonite	essenite	jadeite
	39.35	16.24	20.09	14.58	-9.48	15.04	4.18
feldspar	mass	=	35.35	(gm)	density	=	2.67	(gm/cc)	(analysis	in	mole	%)
	K0.00Na0.36Ca0.64Al1.64Si2.36O8
	G	=	-591381	(J)	H	=	-489538	(J)	S	=	80.63	(J/K)	V	=	13.23	(cc)	Cp	=	42.88	(J/K)
	albite	anorthite	sanidine
	36	63.55	0.45
spinel	mass	=	3.54	(gm)	density	=	3.83	(gm/cc)	(analysis	in	mole	%)
	Fe''0.32Mg0.69Fe'''0.19Al1.79Cr0.00Ti0.01O4
	G	=	-52540	(J)	H	=	-42842.3	(J)	S	=	7.68	(J/K)	V	=	0.92	(cc)	Cp	=	4.23	(J/K)
	chromite	hercynite	magnetite	spinel	ulvospinel
	0	20.78	9.64	68.73	0.86
Total	solids	mass	=	91.22	(gm)	density	=	3.05	(gm/cc)
	G	=	-1.44273e+06	(J)	H	=	-1.18505e+06	(J)	S	=	204	(J/K)	V	=	29.91	(cc)	Cp	=	109.98	(J/K)
Viscosity	of	the	System	cannot	be	computed.
System	mass	=	100.08	(gm)	density	=	2.98	(gm/cc)
	G	=	-1.58824e+06	(J)	H	=	-1.29794e+06	(J)	S	=	229.83	(J/K)	V	=	33.62	(cc)	Cp	=	122.95	(J/K)
Oxygen	delta	moles	=	-0.000305623	delta	grams	=	-0.00977957
	G	=	87.43	(J)	H	=	-9.78	(J)	S	=	-0.08	(J/K)	V	=	-32.1	(cc)	Cp	=	-0.01	(J/K)
**********----------**********
Title:	Dummy	Title
T	=	980	(C)	P	=	5	(kbars)	log(10)	f	O2	=	-10.78	delta	HM	=	-5.23	NNO	=	-0.24	QFM	=	0	COH	=	1.69	IW	=	4.17
Constraint	Flags:	fO2	path	=	QFM
Liquid	mass	=	8.37	(gm)	density	=	2.37	(gm/cc)	viscosity	=	2.47	(log	10	poise)	(analysis	in	wt	%)
	G	=	-137603	(J)	H	=	-106911	(J)	S	=	24.49	(J/K)	V	=	3.53	(cc)	Cp	=	12.27	(J/K)
	SiO2	TiO2	Al2O3	Fe2O3	Cr2O3	FeO	MnO	MgO	NiO	CoO	CaO	Na2O	K2O	P2O5	H2O	CO2	SO3	Cl2O-1	F2O-1
	51.73	0.23	22.44	0.88	0	3.8	1.79	1.49	0	0	3.4	7.31	0.96	0	5.97	0	0	0	0
orthopyroxene	mass	=	38.47	(gm)	density	=	3.33	(gm/cc)	(analysis	in	mole	%)
	opx	Na0.00Ca0.05Fe''0.45Mg1.39Fe'''0.02Ti0.00Al0.18Si1.90O6
	G	=	-582349	(J)	H	=	-475532	(J)	S	=	85.24	(J/K)	V	=	11.54	(cc)	Cp	=	46.77	(J/K)
	diopside	clinoenstatit	hedenbergite	alumino-buffo	buffonite	essenite	jadeite
	-50.81	94.89	45.32	7.98	-7.21	9.51	0.32
clinopyroxene	mass	=	14.01	(gm)	density	=	3.3	(gm/cc)	(analysis	in	mole	%)
	cpx	Na0.04Ca0.80Fe''0.20Mg0.74Fe'''0.05Ti0.03Al0.34Si1.80O6
	G	=	-217181	(J)	H	=	-179286	(J)	S	=	30.24	(J/K)	V	=	4.24	(cc)	Cp	=	16.19	(J/K)
	diopside	clinoenstatit	hedenbergite	alumino-buffo	buffonite	essenite	jadeite
	40.05	15.68	19.87	14.67	-9.44	14.92	4.25
feldspar	mass	=	35.62	(gm)	density	=	2.67	(gm/cc)	(analysis	in	mole	%)
	K0.00Na0.36Ca0.63Al1.63Si2.37O8
	G	=	-595211	(J)	H	=	-493776	(J)	S	=	80.94	(J/K)	V	=	13.34	(cc)	Cp	=	43.18	(J/K)
	albite	anorthite	sanidine
	36.44	63.09	0.47
spinel	mass	=	3.61	(gm)	density	=	3.83	(gm/cc)	(analysis	in	mole	%)
	Fe''0.32Mg0.69Fe'''0.19Al1.79Cr0.00Ti0.01O4
	G	=	-53574	(J)	H	=	-43809.6	(J)	S	=	7.79	(J/K)	V	=	0.94	(cc)	Cp	=	4.31	(J/K)
	chromite	hercynite	magnetite	spinel	ulvospinel
	0	20.92	9.44	68.82	0.82
Total	solids	mass	=	91.71	(gm)	density	=	3.05	(gm/cc)
	G	=	-1.44832e+06	(J)	H	=	-1.1924e+06	(J)	S	=	204.22	(J/K)	V	=	30.06	(cc)	Cp	=	110.44	(J/K)
Viscosity	of	the	System	cannot	be	computed.
System	mass	=	100.08	(gm)	density	=	2.98	(gm/cc)
	G	=	-1.58592e+06	(J)	H	=	-1.29931e+06	(J)	S	=	228.71	(J/K)	V	=	33.59	(cc)	Cp	=	122.72	(J/K)
Oxygen	delta	moles	=	-0.000367146	delta	grams	=	-0.0117482
	G	=	104.11	(J)	H	=	-11.62	(J)	S	=	-0.09	(J/K)	V	=	-38.25	(cc)	Cp	=	-0.01	(J/K)
**********----------**********
Title:	Dummy	Title
T	=	970	(C)	P	=	5	(kbars)	log(10)	f	O2	=	-10.93	delta	HM	=	-5.23	NNO	=	-0.24	QFM	=	0	COH	=	1.68	IW	=	4.19
Constraint	Flags:	fO2	path	=	QFM
Liquid	mass	=	7.92	(gm)	density	=	2.36	(gm/cc)	viscosity	=	2.42	(log	10	poise)	(analysis	in	wt	%)
	G	=	-130211	(J)	H	=	-101311	(J)	S	=	23.25	(J/K)	V	=	3.35	(cc)	Cp	=	11.62	(J/K)
	SiO2	TiO2	Al2O3	Fe2O3	Cr2O3	FeO	MnO	MgO	NiO	CoO	CaO	Na2O	K2O	P2O5	H2O	CO2	SO3	Cl2O-1	F2O-1
	51.62	0.21	22.5	0.84	0	3.59	1.89	1.4	0	0	3.28	7.35	1	0	6.32	0	0	0	0
orthopyroxene	mass	=	38.52	(gm)	density	=	3.34	(gm/cc)	(analysis	in	mole	%)
	opx	Na0.00Ca0.05Fe''0.46Mg1.39Fe'''0.02Ti0.00Al0.18Si1.90O6
	G	=	-581931	(J)	H	=	-476307	(J)	S	=	84.97	(J/K)	V	=	11.55	(cc)	Cp	=	46.78	(J/K)
	diopside	clinoenstatit	hedenbergite	alumino-buffo	buffonite	essenite	jadeite
	-51.14	94.98	45.66	7.95	-7.19	9.42	0.32
clinopyroxene	mass	=	14.08	(gm)	density	=	3.3	(gm/cc)	(analysis	in	mole	%)
	cpx	Na0.04Ca0.81Fe''0.20Mg0.74Fe'''0.05Ti0.03Al0.34Si1.80O6
	G	=	-218131	(J)	H	=	-180513	(J)	S	=	30.26	(J/K)	V	=	4.26	(cc)	Cp	=	16.25	(J/K)
	diopside	clinoenstatit	hedenbergite	alumino-buffo	buffonite	essenite	jadeite
	40.73	15.15	19.65	14.76	-9.41	14.79	4.33
feldspar	mass	=	35.89	(gm)	density	=	2.67	(gm/cc)	(analysis	in	mole	%)
	K0.00Na0.37Ca0.63Al1.63Si2.37O8
	G	=	-598775	(J)	H	=	-497807	(J)	S	=	81.22	(J/K)	V	=	13.44	(cc)	Cp	=	43.45	(J/K)
	albite	anorthite	sanidine
	36.86	62.64	0.5
spinel	mass	=	3.67	(gm)	density	=	3.83	(gm/cc)	(analysis	in	mole	%)
	Fe''0.32Mg0.69Fe'''0.18Al1.80Cr0.00Ti0.01O4
	G	=	-54554.2	(J)	H	=	-44738.5	(J)	S	=	7.9	(J/K)	V	=	0.96	(cc)	Cp	=	4.39	(J/K)
	chromite	hercynite	magnetite	spinel	ulvospinel
	0	21.04	9.24	68.94	0.78
Total	solids	mass	=	92.16	(gm)	density	=	3.05	(gm/cc)
	G	=	-1.45339e+06	(J)	H	=	-1.19937e+06	(J)	S	=	204.34	(J/K)	V	=	30.21	(cc)	Cp	=	110.87	(J/K)
Viscosity	of	the	System	cannot	be	computed.
System	mass	=	100.08	(gm)	density	=	2.98	(gm/cc)
	G	=	-1.5836e+06	(J)	H	=	-1.30068e+06	(J)	S	=	227.59	(J/K)	V	=	33.56	(cc)	Cp	=	122.49	(J/K)
Oxygen	delta	moles	=	-0.000431083	delta	grams	=	-0.0137941
	G	=	121.16	(J)	H	=	-13.49	(J)	S	=	-0.11	(J/K)	V	=	-44.56	(cc)	Cp	=	-0.02	(J/K)
**********----------**********
Title:	Dummy	Title
T	=	960	(C)	P	=	5	(kbars)	log(10)	f	O2	=	-11.08	delta	HM	=	-5.23	NNO	=	-0.23	QFM	=	0	COH	=	1.66	IW	=	4.21
Constraint	Flags:	fO2	path	=	QFM
Liquid	mass	=	7.49	(gm)	density	=	2.35	(gm/cc)	viscosity	=	2.37	(log	10	poise)	(analysis	in	wt	%)
	G	=	-123282	(J)	H	=	-96049.2	(J)	S	=	22.08	(J/K)	V	=	3.19	(cc)	Cp	=	11.02	(J/K)
	SiO2	TiO2	Al2O3	Fe2O3	Cr2O3	FeO	MnO	MgO	NiO	CoO	CaO	Na2O	K2O	P2O5	H2O	CO2	SO3	Cl2O-1	F2O-1
	51.47	0.19	22.57	0.8	0	3.39	2	1.32	0	0	3.16	7.38	1.04	0	6.67	0	0	0	0
orthopyroxene	mass	=	38.57	(gm)	density	=	3.34	(gm/cc)	(analysis	in	mole	%)
	opx	Na0.00Ca0.05Fe''0.46Mg1.39Fe'''0.02Ti0.00Al0.18Si1.90O6
	G	=	-581425	(J)	H	=	-477010	(J)	S	=	84.67	(J/K)	V	=	11.55	(cc)	Cp	=	46.77	(J/K)
	diopside	clinoenstatit	hedenbergite	alumino-buffo	buffonite	essenite	jadeite
	-51.48	95.07	46	7.92	-7.18	9.34	0.32
clinopyroxene	mass	=	14.15	(gm)	density	=	3.3	(gm/cc)	(analysis	in	mole	%)
	cpx	Na0.04Ca0.81Fe''0.19Mg0.73Fe'''0.05Ti0.03Al0.34Si1.80O6
	G	=	-219005	(J)	H	=	-181682	(J)	S	=	30.27	(J/K)	V	=	4.28	(cc)	Cp	=	16.31	(J/K)
	diopside	clinoenstatit	hedenbergite	alumino-buffo	buffonite	essenite	jadeite
	41.4	14.64	19.43	14.84	-9.38	14.66	4.4
feldspar	mass	=	36.13	(gm)	density	=	2.67	(gm/cc)	(analysis	in	mole	%)
	K0.01Na0.37Ca0.62Al1.62Si2.38O8
	G	=	-602100	(J)	H	=	-501655	(J)	S	=	81.45	(J/K)	V	=	13.53	(cc)	Cp	=	43.71	(J/K)
	albite	anorthite	sanidine
	37.26	62.22	0.52
spinel	mass	=	3.73	(gm)	density	=	3.82	(gm/cc)	(analysis	in	mole	%)
	Fe''0.32Mg0.69Fe'''0.18Al1.80Cr0.00Ti0.01O4
	G	=	-55484.5	(J)	H	=	-45631.7	(J)	S	=	7.99	(J/K)	V	=	0.98	(cc)	Cp	=	4.46	(J/K)
	chromite	hercynite	magnetite	spinel	ulvospinel
	0	21.15	9.03	69.08	0.74
Total	solids	mass	=	92.59	(gm)	density	=	3.05	(gm/cc)
	G	=	-1.45801e+06	(J)	H	=	-1.20598e+06	(J)	S	=	204.38	(J/K)	V	=	30.35	(cc)	Cp	=	111.25	(J/K)
Viscosity	of	the	System	cannot	be	computed.
System	mass	=	100.08	(gm)	density	=	2.98	(gm/cc)
	G	=	-1.5813e+06	(J)	H	=	-1.30203e+06	(J)	S	=	226.47	(J/K)	V	=	33.53	(cc)	Cp	=	122.27	(J/K)
Oxygen	delta	moles	=	-0.000497196	delta	grams	=	-0.0159097
	G	=	138.49	(J)	H	=	-15.38	(J)	S	=	-0.12	(J/K)	V	=	-50.98	(cc)	Cp	=	-0.02	(J/K)
**********----------**********
Title:	Dummy	Title
T	=	950	(C)	P	=	5	(kbars)	log(10)	f	O2	=	-11.24	delta	HM	=	-5.23	NNO	=	-0.22	QFM	=	0	COH	=	1.64	IW	=	4.22
Constraint	Flags:	fO2	path	=	QFM
Liquid	mass	=	7.09	(gm)	density	=	2.34	(gm/cc)	viscosity	=	2.32	(log	10	poise)	(analysis	in	wt	%)
	G	=	-116766	(J)	H	=	-91089.3	(J)	S	=	20.99	(J/K)	V	=	3.03	(cc)	Cp	=	10.45	(J/K)
	SiO2	TiO2	Al2O3	Fe2O3	Cr2O3	FeO	MnO	MgO	NiO	CoO	CaO	Na2O	K2O	P2O5	H2O	CO2	SO3	Cl2O-1	F2O-1
	51.29	0.18	22.63	0.77	0	3.2	2.12	1.25	0	0	3.04	7.4	1.07	0	7.05	0	0	0	0
orthopyroxene	mass	=	38.61	(gm)	density	=	3.34	(gm/cc)	(analysis	in	mole	%)
	opx	Na0.00Ca0.05Fe''0.46Mg1.39Fe'''0.02Ti0.00Al0.17Si1.90O6
	G	=	-580845	(J)	H	=	-477652	(J)	S	=	84.37	(J/K)	V	=	11.56	(cc)	Cp	=	46.76	(J/K)
	diopside	clinoenstatit	hedenbergite	alumino-buffo	buffonite	essenite	jadeite
	-51.8	95.16	46.33	7.89	-7.17	9.26	0.32
clinopyroxene	mass	=	14.22	(gm)	density	=	3.3	(gm/cc)	(analysis	in	mole	%)
	cpx	Na0.04Ca0.81Fe''0.19Mg0.73Fe'''0.05Ti0.03Al0.34Si1.80O6
	G	=	-219811	(J)	H	=	-182796	(J)	S	=	30.26	(J/K)	V	=	4.3	(cc)	Cp	=	16.37	(J/K)
	diopside	clinoenstatit	hedenbergite	alumino-buffo	buffonite	essenite	jadeite
	42.06	14.15	19.21	14.92	-9.35	14.53	4.47
feldspar	mass	=	36.37	(gm)	density	=	2.67	(gm/cc)	(analysis	in	mole	%)
	K0.01Na0.38Ca0.62Al1.62Si2.38O8
	G	=	-605211	(J)	H	=	-505337	(J)	S	=	81.65	(J/K)	V	=	13.62	(cc)	Cp	=	43.95	(J/K)
	albite	anorthite	sanidine
	37.65	61.81	0.54
spinel	mass	=	3.79	(gm)	density	=	3.82	(gm/cc)	(analysis	in	mole	%)
	Fe''0.31Mg0.69Fe'''0.18Al1.81Cr0.00Ti0.01O4
	G	=	-56367.9	(J)	H	=	-46491.3	(J)	S	=	8.07	(J/K)	V	=	0.99	(cc)	Cp	=	4.52	(J/K)
	chromite	hercynite	magnetite	spinel	ulvospinel
	0	21.25	8.81	69.23	0.7
Total	solids	mass	=	92.99	(gm)	density	=	3.05	(gm/cc)
	G	=	-1.46223e+06	(J)	H	=	-1.21228e+06	(J)	S	=	204.36	(J/K)	V	=	30.47	(cc)	Cp	=	111.6	(J/K)
Viscosity	of	the	System	cannot	be	computed.
System	mass	=	100.08	(gm)	density	=	2.99	(gm/cc)
	G	=	-1.579e+06	(J)	H	=	-1.30337e+06	(J)	S	=	225.35	(J/K)	V	=	33.51	(cc)	Cp	=	122.05	(J/K)
Oxygen	delta	moles	=	-0.000565261	delta	grams	=	-0.0180877
	G	=	156.03	(J)	H	=	-17.28	(J)	S	=	-0.14	(J/K)	V	=	-57.48	(cc)	Cp	=	-0.02	(J/K)
**********----------**********
Title:	Dummy	Title
T	=	940	(C)	P	=	5	(kbars)	log(10)	f	O2	=	-11.4	delta	HM	=	-5.23	NNO	=	-0.21	QFM	=	0	COH	=	1.63	IW	=	4.24
Constraint	Flags:	fO2	path	=	QFM
Liquid	mass	=	6.71	(gm)	density	=	2.33	(gm/cc)	viscosity	=	2.26	(log	10	poise)	(analysis	in	wt	%)
	G	=	-110622	(J)	H	=	-86400.8	(J)	S	=	19.97	(J/K)	V	=	2.89	(cc)	Cp	=	9.91	(J/K)
	SiO2	TiO2	Al2O3	Fe2O3	Cr2O3	FeO	MnO	MgO	NiO	CoO	CaO	Na2O	K2O	P2O5	H2O	CO2	SO3	Cl2O-1	F2O-1
	51.06	0.16	22.7	0.74	0	3.03	2.23	1.18	0	0	2.93	7.41	1.11	0	7.45	0	0	0	0
orthopyroxene	mass	=	38.65	(gm)	density	=	3.34	(gm/cc)	(analysis	in	mole	%)
	opx	Na0.00Ca0.04Fe''0.47Mg1.39Fe'''0.02Ti0.00Al0.17Si1.90O6
	G	=	-580203	(J)	H	=	-478243	(J)	S	=	84.05	(J/K)	V	=	11.56	(cc)	Cp	=	46.74	(J/K)
	diopside	clinoenstatit	hedenbergite	alumino-buffo	buffonite	essenite	jadeite
	-52.12	95.25	46.66	7.86	-7.16	9.18	0.32
clinopyroxene	mass	=	14.28	(gm)	density	=	3.3	(gm/cc)	(analysis	in	mole	%)
	cpx	Na0.05Ca0.82Fe''0.19Mg0.73Fe'''0.05Ti0.03Al0.34Si1.80O6
	G	=	-220550	(J)	H	=	-183858	(J)	S	=	30.24	(J/K)	V	=	4.32	(cc)	Cp	=	16.42	(J/K)
	diopside	clinoenstatit	hedenbergite	alumino-buffo	buffonite	essenite	jadeite
	42.71	13.68	18.99	15	-9.32	14.4	4.54
feldspar	mass	=	36.6	(gm)	density	=	2.67	(gm/cc)	(analysis	in	mole	%)
	K0.01Na0.38Ca0.61Al1.61Si2.39O8
	G	=	-608133	(J)	H	=	-508873	(J)	S	=	81.82	(J/K)	V	=	13.71	(cc)	Cp	=	44.18	(J/K)
	albite	anorthite	sanidine
	38.01	61.42	0.56
spinel	mass	=	3.84	(gm)	density	=	3.82	(gm/cc)	(analysis	in	mole	%)
	Fe''0.31Mg0.69Fe'''0.17Al1.81Cr0.00Ti0.01O4
	G	=	-57207.5	(J)	H	=	-47319.2	(J)	S	=	8.15	(J/K)	V	=	1.01	(cc)	Cp	=	4.59	(J/K)
	chromite	hercynite	magnetite	spinel	ulvospinel
	0	21.34	8.59	69.41	0.66
Total	solids	mass	=	93.36	(gm)	density	=	3.05	(gm/cc)
	G	=	-1.46609e+06	(J)	H	=	-1.21829e+06	(J)	S	=	204.26	(J/K)	V	=	30.59	(cc)	Cp	=	111.93	(J/K)
Viscosity	of	the	System	cannot	be	computed.
System	mass	=	100.07	(gm)	density	=	2.99	(gm/cc)
	G	=	-1.57671e+06	(J)	H	=	-1.30469e+06	(J)	S	=	224.23	(J/K)	V	=	33.48	(cc)	Cp	=	121.84	(J/K)
Oxygen	delta	moles	=	-0.000635069	delta	grams	=	-0.0203214
	G	=	173.71	(J)	H	=	-19.19	(J)	S	=	-0.16	(J/K)	V	=	-64.06	(cc)	Cp	=	-0.02	(J/K)
**********----------**********
Title:	Dummy	Title
T	=	930	(C)	P	=	5	(kbars)	log(10)	f	O2	=	-11.57	delta	HM	=	-5.23	NNO	=	-0.21	QFM	=	0	COH	=	1.61	IW	=	4.26
Constraint	Flags:	fO2	path	=	QFM
Liquid	mass	=	6.36	(gm)	density	=	2.32	(gm/cc)	viscosity	=	2.19	(log	10	poise)	(analysis	in	wt	%)
	G	=	-104813	(J)	H	=	-81956.3	(J)	S	=	19	(J/K)	V	=	2.75	(cc)	Cp	=	9.41	(J/K)
	SiO2	TiO2	Al2O3	Fe2O3	Cr2O3	FeO	MnO	MgO	NiO	CoO	CaO	Na2O	K2O	P2O5	H2O	CO2	SO3	Cl2O-1	F2O-1
	50.8	0.15	22.77	0.7	0	2.86	2.36	1.11	0	0	2.82	7.42	1.14	0	7.86	0	0	0	0
orthopyroxene	mass	=	38.68	(gm)	density	=	3.35	(gm/cc)	(analysis	in	mole	%)
	opx	Na0.00Ca0.04Fe''0.47Mg1.39Fe'''0.02Ti0.00Al0.17Si1.90O6
	G	=	-579511	(J)	H	=	-478792	(J)	S	=	83.71	(J/K)	V	=	11.56	(cc)	Cp	=	46.72	(J/K)
	diopside	clinoenstatit	hedenbergite	alumino-buffo	buffonite	essenite	jadeite
	-52.44	95.34	46.99	7.83	-7.15	9.1	0.32
clinopyroxene	mass	=	14.33	(gm)	density	=	3.31	(gm/cc)	(analysis	in	mole	%)
	cpx	Na0.05Ca0.82Fe''0.19Mg0.73Fe'''0.05Ti0.03Al0.34Si1.80O6
	G	=	-221225	(J)	H	=	-184869	(J)	S	=	30.22	(J/K)	V	=	4.34	(cc)	Cp	=	16.47	(J/K)
	diopside	clinoenstatit	hedenbergite	alumino-buffo	buffonite	essenite	jadeite
	43.34	13.22	18.78	15.08	-9.29	14.27	4.6
feldspar	mass	=	36.81	(gm)	density	=	2.67	(gm/cc)	(analysis	in	mole	%)
	K0.01Na0.38Ca0.61Al1.61Si2.39O8
	G	=	-610885	(J)	H	=	-512279	(J)	S	=	81.96	(J/K)	V	=	13.79	(cc)	Cp	=	44.39	(J/K)
	albite	anorthite	sanidine
	38.36	61.05	0.59
spinel	mass	=	3.89	(gm)	density	=	3.82	(gm/cc)	(analysis	in	mole	%)
	Fe''0.31Mg0.70Fe'''0.17Al1.82Cr0.00Ti0.01O4
	G	=	-58005.5	(J)	H	=	-48116.9	(J)	S	=	8.22	(J/K)	V	=	1.02	(cc)	Cp	=	4.65	(J/K)
	chromite	hercynite	magnetite	spinel	ulvospinel
	0	21.42	8.37	69.6	0.62
Total	solids	mass	=	93.71	(gm)	density	=	3.05	(gm/cc)
	G	=	-1.46963e+06	(J)	H	=	-1.22406e+06	(J)	S	=	204.11	(J/K)	V	=	30.71	(cc)	Cp	=	112.23	(J/K)
Viscosity	of	the	System	cannot	be	computed.
System	mass	=	100.07	(gm)	density	=	2.99	(gm/cc)
	G	=	-1.57444e+06	(J)	H	=	-1.30601e+06	(J)	S	=	223.1	(J/K)	V	=	33.45	(cc)	Cp	=	121.63	(J/K)
Oxygen	delta	moles	=	-0.000706421	delta	grams	=	-0.0226046
	G	=	191.46	(J)	H	=	-21.09	(J)	S	=	-0.18	(J/K)	V	=	-70.67	(cc)	Cp	=	-0.03	(J/K)
**********----------**********
Title:	Dummy	Title
T	=	920	(C)	P	=	5	(kbars)	log(10)	f	O2	=	-11.73	delta	HM	=	-5.23	NNO	=	-0.2	QFM	=	0	COH	=	1.59	IW	=	4.29
Constraint	Flags:	fO2	path	=	QFM
Liquid	mass	=	6.02	(gm)	density	=	2.3	(gm/cc)	viscosity	=	2.12	(log	10	poise)	(analysis	in	wt	%)
	G	=	-99306.1	(J)	H	=	-77732.1	(J)	S	=	18.08	(J/K)	V	=	2.61	(cc)	Cp	=	8.93	(J/K)
	SiO2	TiO2	Al2O3	Fe2O3	Cr2O3	FeO	MnO	MgO	NiO	CoO	CaO	Na2O	K2O	P2O5	H2O	CO2	SO3	Cl2O-1	F2O-1
	50.5	0.14	22.83	0.67	0	2.69	2.49	1.04	0	0	2.72	7.42	1.17	0	8.31	0	0	0	0
orthopyroxene	mass	=	38.71	(gm)	density	=	3.35	(gm/cc)	(analysis	in	mole	%)
	opx	Na0.00Ca0.04Fe''0.47Mg1.38Fe'''0.02Ti0.00Al0.17Si1.90O6
	G	=	-578779	(J)	H	=	-479304	(J)	S	=	83.37	(J/K)	V	=	11.56	(cc)	Cp	=	46.69	(J/K)
	diopside	clinoenstatit	hedenbergite	alumino-buffo	buffonite	essenite	jadeite
	-52.76	95.44	47.31	7.8	-7.13	9.03	0.32
clinopyroxene	mass	=	14.38	(gm)	density	=	3.31	(gm/cc)	(analysis	in	mole	%)
	cpx	Na0.05Ca0.83Fe''0.19Mg0.72Fe'''0.05Ti0.03Al0.34Si1.80O6
	G	=	-221838	(J)	H	=	-185830	(J)	S	=	30.18	(J/K)	V	=	4.35	(cc)	Cp	=	16.51	(J/K)
	diopside	clinoenstatit	hedenbergite	alumino-buffo	buffonite	essenite	jadeite
	43.97	12.78	18.56	15.15	-9.27	14.14	4.67
feldspar	mass	=	37.02	(gm)	density	=	2.67	(gm/cc)	(analysis	in	mole	%)
	K0.01Na0.39Ca0.61Al1.61Si2.39O8
	G	=	-613487	(J)	H	=	-515569	(J)	S	=	82.07	(J/K)	V	=	13.87	(cc)	Cp	=	44.6	(J/K)
	albite	anorthite	sanidine
	38.69	60.69	0.61
spinel	mass	=	3.94	(gm)	density	=	3.81	(gm/cc)	(analysis	in	mole	%)
	Fe''0.31Mg0.70Fe'''0.16Al1.83Cr0.00Ti0.01O4
	G	=	-58764.4	(J)	H	=	-48885.9	(J)	S	=	8.28	(J/K)	V	=	1.03	(cc)	Cp	=	4.7	(J/K)
	chromite	hercynite	magnetite	spinel	ulvospinel
	0	21.48	8.14	69.8	0.58
Total	solids	mass	=	94.05	(gm)	density	=	3.05	(gm/cc)
	G	=	-1.47287e+06	(J)	H	=	-1.22959e+06	(J)	S	=	203.9	(J/K)	V	=	30.81	(cc)	Cp	=	112.5	(J/K)
Viscosity	of	the	System	cannot	be	computed.
System	mass	=	100.07	(gm)	density	=	2.99	(gm/cc)
	G	=	-1.57218e+06	(J)	H	=	-1.30732e+06	(J)	S	=	221.98	(J/K)	V	=	33.42	(cc)	Cp	=	121.43	(J/K)
Oxygen	delta	moles	=	-0.000779129	delta	grams	=	-0.0249312
	G	=	209.21	(J)	H	=	-22.99	(J)	S	=	-0.19	(J/K)	V	=	-77.29	(cc)	Cp	=	-0.03	(J/K)
**********----------**********
Title:	Dummy	Title
T	=	910	(C)	P	=	5	(kbars)	log(10)	f	O2	=	-11.9	delta	HM	=	-5.23	NNO	=	-0.19	QFM	=	0	COH	=	1.58	IW	=	4.31
Constraint	Flags:	fO2	path	=	QFM
Liquid	mass	=	5.41	(gm)	density	=	2.3	(gm/cc)	viscosity	=	2.04	(log	10	poise)	(analysis	in	wt	%)
	G	=	-89222.1	(J)	H	=	-69923.5	(J)	S	=	16.31	(J/K)	V	=	2.36	(cc)	Cp	=	8.04	(J/K)
	SiO2	TiO2	Al2O3	Fe2O3	Cr2O3	FeO	MnO	MgO	NiO	CoO	CaO	Na2O	K2O	P2O5	H2O	CO2	SO3	Cl2O-1	F2O-1
	50.12	0.14	22.95	0.64	0	2.55	2.77	0.99	0	0	2.65	7.24	1.25	0	8.71	0	0	0	0
orthopyroxene	mass	=	38.89	(gm)	density	=	3.35	(gm/cc)	(analysis	in	mole	%)
	opx	Na0.00Ca0.04Fe''0.48Mg1.38Fe'''0.02Ti0.00Al0.17Si1.90O6
	G	=	-579802	(J)	H	=	-481212	(J)	S	=	83.33	(J/K)	V	=	11.6	(cc)	Cp	=	46.82	(J/K)
	diopside	clinoenstatit	hedenbergite	alumino-buffo	buffonite	essenite	jadeite
	-53.45	95.53	47.94	7.83	-7.15	8.99	0.31
clinopyroxene	mass	=	13.35	(gm)	density	=	3.31	(gm/cc)	(analysis	in	mole	%)
	cpx	Na0.05Ca0.83Fe''0.18Mg0.72Fe'''0.05Ti0.03Al0.34Si1.80O6
	G	=	-205591	(J)	H	=	-172627	(J)	S	=	27.86	(J/K)	V	=	4.03	(cc)	Cp	=	15.29	(J/K)
	diopside	clinoenstatit	hedenbergite	alumino-buffo	buffonite	essenite	jadeite
	44.26	12.27	18.41	15.57	-9.18	13.98	4.69
hornblende	mass	=	1.35	(gm)	density	=	3.06	(gm/cc)	(analysis	in	mole	%)
	NaCa2Mg3.25Fe2+0.75Al1.00Fe3+0.00Al2Si6O22(OH)2
	G	=	-21583.2	(J)	H	=	-17933.9	(J)	S	=	3.08	(J/K)	V	=	0.44	(cc)	Cp	=	1.67	(J/K)
	pargasite	ferropargasit	magnesiohasti
	81.06	18.78	0.17
feldspar	mass	=	37.41	(gm)	density	=	2.67	(gm/cc)	(analysis	in	mole	%)
	K0.01Na0.39Ca0.61Al1.61Si2.39O8
	G	=	-619073	(J)	H	=	-521410	(J)	S	=	82.54	(J/K)	V	=	14.01	(cc)	Cp	=	45.01	(J/K)
	albite	anorthite	sanidine
	38.6	60.75	0.65
spinel	mass	=	3.66	(gm)	density	=	3.81	(gm/cc)	(analysis	in	mole	%)
	Fe''0.31Mg0.70Fe'''0.16Al1.83Cr0.00Ti0.01O4
	G	=	-54583.5	(J)	H	=	-45526.6	(J)	S	=	7.65	(J/K)	V	=	0.96	(cc)	Cp	=	4.37	(J/K)
	chromite	hercynite	magnetite	spinel	ulvospinel
	0	21.71	7.95	69.76	0.57
Total	solids	mass	=	94.65	(gm)	density	=	3.05	(gm/cc)
	G	=	-1.48063e+06	(J)	H	=	-1.23871e+06	(J)	S	=	204.47	(J/K)	V	=	31.05	(cc)	Cp	=	113.16	(J/K)
Viscosity	of	the	System	cannot	be	computed.
System	mass	=	100.06	(gm)	density	=	3	(gm/cc)
	G	=	-1.56985e+06	(J)	H	=	-1.30863e+06	(J)	S	=	220.78	(J/K)	V	=	33.4	(cc)	Cp	=	121.2	(J/K)
Oxygen	delta	moles	=	-0.000978729	delta	grams	=	-0.0313182
	G	=	260.37	(J)	H	=	-28.53	(J)	S	=	-0.24	(J/K)	V	=	-96.28	(cc)	Cp	=	-0.03	(J/K)
**********----------**********
Title:	Dummy	Title
T	=	900	(C)	P	=	5	(kbars)	log(10)	f	O2	=	-12.08	delta	HM	=	-5.23	NNO	=	-0.19	QFM	=	0	COH	=	1.56	IW	=	4.33
Constraint	Flags:	fO2	path	=	QFM
Liquid	mass	=	3.66	(gm)	density	=	2.31	(gm/cc)	viscosity	=	1.97	(log	10	poise)	(analysis	in	wt	%)
	G	=	-60008.1	(J)	H	=	-47133.5	(J)	S	=	10.97	(J/K)	V	=	1.58	(cc)	Cp	=	5.43	(J/K)
	SiO2	TiO2	Al2O3	Fe2O3	Cr2O3	FeO	MnO	MgO	NiO	CoO	CaO	Na2O	K2O	P2O5	H2O	CO2	SO3	Cl2O-1	F2O-1
	49.35	0.17	23.19	0.53	0	2.13	4.1	0.98	0	0	2.55	6.66	1.57	0	8.76	0	0	0	0
garnet	mass	=	11.58	(gm)	density	=	3.78	(gm/cc)	(analysis	in	mole	%)
	(Ca0.16Fe''0.38Mg0.46)3Al2Si3O12
	G	=	-170323	(J)	H	=	-142424	(J)	S	=	23.78	(J/K)	V	=	3.07	(cc)	Cp	=	13.13	(J/K)
	almandine	grossular	pyrope
	38.03	16.25	45.72
orthopyroxene	mass	=	33.38	(gm)	density	=	3.34	(gm/cc)	(analysis	in	mole	%)
	opx	Na0.00Ca0.04Fe''0.45Mg1.41Fe'''0.02Ti0.00Al0.17Si1.90O6
	G	=	-500803	(J)	H	=	-417153	(J)	S	=	71.3	(J/K)	V	=	9.99	(cc)	Cp	=	40.3	(J/K)
	diopside	clinoenstatit	hedenbergite	alumino-buffo	buffonite	essenite	jadeite
	-50.71	95.84	44.91	7.97	-7.06	8.75	0.31
clinopyroxene	mass	=	7.51	(gm)	density	=	3.31	(gm/cc)	(analysis	in	mole	%)
	cpx	Na0.05Ca0.84Fe''0.17Mg0.72Fe'''0.05Ti0.05Al0.35Si1.78O6
	G	=	-115890	(J)	H	=	-97601.6	(J)	S	=	15.59	(J/K)	V	=	2.27	(cc)	Cp	=	8.6	(J/K)
	diopside	clinoenstatit	hedenbergite	alumino-buffo	buffonite	essenite	jadeite
	45.5	11	16.71	17.54	-8.51	13.03	4.73
clinopyroxene	mass	=	0.26	(gm)	density	=	3.5	(gm/cc)	(analysis	in	mole	%)
	cpx	Na0.03Ca0.94Fe''0.13Mg0.46Fe'''0.05Ti0.38Al0.80Si1.21O6
	G	=	-4019.31	(J)	H	=	-3395.96	(J)	S	=	0.53	(J/K)	V	=	0.08	(cc)	Cp	=	0.29	(J/K)
	diopside	clinoenstatit	hedenbergite	alumino-buffo	buffonite	essenite	jadeite
	1.06	3.27	13.32	74.58	2.27	2.61	2.88
hornblende	mass	=	8.54	(gm)	density	=	3.06	(gm/cc)	(analysis	in	mole	%)
	NaCa2Mg3.30Fe2+0.70Al1.00Fe3+0.00Al2Si6O22(OH)2
	G	=	-136298	(J)	H	=	-113570	(J)	S	=	19.37	(J/K)	V	=	2.79	(cc)	Cp	=	10.51	(J/K)
	pargasite	ferropargasit	magnesiohasti
	82.29	17.56	0.15
feldspar	mass	=	34.99	(gm)	density	=	2.67	(gm/cc)	(analysis	in	mole	%)
	K0.01Na0.39Ca0.60Al1.60Si2.40O8
	G	=	-578196	(J)	H	=	-487971	(J)	S	=	76.91	(J/K)	V	=	13.11	(cc)	Cp	=	42.06	(J/K)
	albite	anorthite	sanidine
	39.43	59.71	0.86
spinel	mass	=	0.09	(gm)	density	=	3.78	(gm/cc)	(analysis	in	mole	%)
	Fe''0.28Mg0.73Fe'''0.14Al1.85Cr0.00Ti0.01O4
	G	=	-1346.45	(J)	H	=	-1128.92	(J)	S	=	0.19	(J/K)	V	=	0.02	(cc)	Cp	=	0.11	(J/K)
	chromite	hercynite	magnetite	spinel	ulvospinel
	0	19.85	6.97	72.58	0.59
Total	solids	mass	=	96.36	(gm)	density	=	3.08	(gm/cc)
	G	=	-1.50688e+06	(J)	H	=	-1.26324e+06	(J)	S	=	207.67	(J/K)	V	=	31.33	(cc)	Cp	=	115	(J/K)
Viscosity	of	the	System	cannot	be	computed.
System	mass	=	100.02	(gm)	density	=	3.04	(gm/cc)
	G	=	-1.56688e+06	(J)	H	=	-1.31038e+06	(J)	S	=	218.65	(J/K)	V	=	32.91	(cc)	Cp	=	120.43	(J/K)
Oxygen	delta	moles	=	-0.00242631	delta	grams	=	-0.0776389
	G	=	639.41	(J)	H	=	-69.86	(J)	S	=	-0.6	(J/K)	V	=	-236.66	(cc)	Cp	=	-0.09	(J/K)
**********----------**********
Title:	Dummy	Title
T	=	890	(C)	P	=	5	(kbars)	log(10)	f	O2	=	-12.25	delta	HM	=	-5.23	NNO	=	-0.18	QFM	=	0	COH	=	1.54	IW	=	4.35
Constraint	Flags:	fO2	path	=	QFM
Liquid	mass	=	3.44	(gm)	density	=	2.3	(gm/cc)	viscosity	=	1.88	(log	10	poise)	(analysis	in	wt	%)
	G	=	-56409.6	(J)	H	=	-44343.5	(J)	S	=	10.37	(J/K)	V	=	1.5	(cc)	Cp	=	5.11	(J/K)
	SiO2	TiO2	Al2O3	Fe2O3	Cr2O3	FeO	MnO	MgO	NiO	CoO	CaO	Na2O	K2O	P2O5	H2O	CO2	SO3	Cl2O-1	F2O-1
	49.2	0.16	23.05	0.49	0	1.94	4.36	0.93	0	0	2.48	6.59	1.52	0	9.28	0	0	0	0
garnet	mass	=	12.85	(gm)	density	=	3.78	(gm/cc)	(analysis	in	mole	%)
	(Ca0.16Fe''0.38Mg0.46)3Al2Si3O12
	G	=	-188685	(J)	H	=	-158139	(J)	S	=	26.26	(J/K)	V	=	3.4	(cc)	Cp	=	14.55	(J/K)
	almandine	grossular	pyrope
	38.1	16.24	45.66
orthopyroxene	mass	=	32.55	(gm)	density	=	3.34	(gm/cc)	(analysis	in	mole	%)
	opx	Na0.00Ca0.04Fe''0.44Mg1.42Fe'''0.02Ti0.00Al0.16Si1.91O6
	G	=	-488299	(J)	H	=	-407799	(J)	S	=	69.21	(J/K)	V	=	9.75	(cc)	Cp	=	39.29	(J/K)
	diopside	clinoenstatit	hedenbergite	alumino-buffo	buffonite	essenite	jadeite
	-50.01	95.91	44.5	7.74	-6.87	8.43	0.31
clinopyroxene	mass	=	7.51	(gm)	density	=	3.31	(gm/cc)	(analysis	in	mole	%)
	cpx	Na0.05Ca0.85Fe''0.16Mg0.73Fe'''0.04Ti0.04Al0.34Si1.79O6
	G	=	-115869	(J)	H	=	-97832	(J)	S	=	15.51	(J/K)	V	=	2.27	(cc)	Cp	=	8.59	(J/K)
	diopside	clinoenstatit	hedenbergite	alumino-buffo	buffonite	essenite	jadeite
	46.96	10.67	16.3	17.12	-8.38	12.6	4.73
clinopyroxene	mass	=	0.33	(gm)	density	=	3.5	(gm/cc)	(analysis	in	mole	%)
	cpx	Na0.03Ca0.94Fe''0.13Mg0.46Fe'''0.05Ti0.39Al0.80Si1.20O6
	G	=	-4978.74	(J)	H	=	-4216.87	(J)	S	=	0.66	(J/K)	V	=	0.09	(cc)	Cp	=	0.36	(J/K)
	diopside	clinoenstatit	hedenbergite	alumino-buffo	buffonite	essenite	jadeite
	1.04	3.11	13.11	75.27	2.3	2.29	2.89
hornblende	mass	=	8.5	(gm)	density	=	3.06	(gm/cc)	(analysis	in	mole	%)
	NaCa2Mg3.31Fe2+0.69Al1.00Fe3+0.00Al2Si6O22(OH)2
	G	=	-135474	(J)	H	=	-113159	(J)	S	=	19.18	(J/K)	V	=	2.78	(cc)	Cp	=	10.44	(J/K)
	pargasite	ferropargasit	magnesiohasti
	82.54	17.32	0.14
biotite	mass	=	0.05	(gm)	density	=	2.73	(gm/cc)	(analysis	in	mole	%)
	K(Fe''0.00Mg1.00)3AlSi3O10(OH)2
	G	=	-834.21	(J)	H	=	-697.07	(J)	S	=	0.12	(J/K)	V	=	0.02	(cc)	Cp	=	0.07	(J/K)
	annite	phlogopite
	0.44	99.56
feldspar	mass	=	34.79	(gm)	density	=	2.67	(gm/cc)	(analysis	in	mole	%)
	K0.01Na0.40Ca0.59Al1.59Si2.41O8
	G	=	-574092	(J)	H	=	-485524	(J)	S	=	76.14	(J/K)	V	=	13.03	(cc)	Cp	=	41.79	(J/K)
	albite	anorthite	sanidine
	40.11	59.02	0.86
Total	solids	mass	=	96.57	(gm)	density	=	3.08	(gm/cc)
	G	=	-1.50823e+06	(J)	H	=	-1.26737e+06	(J)	S	=	207.08	(J/K)	V	=	31.35	(cc)	Cp	=	115.09	(J/K)
Viscosity	of	the	System	cannot	be	computed.
System	mass	=	100.01	(gm)	density	=	3.04	(gm/cc)
	G	=	-1.56464e+06	(J)	H	=	-1.31171e+06	(J)	S	=	217.45	(J/K)	V	=	32.85	(cc)	Cp	=	120.2	(J/K)
Oxygen	delta	moles	=	-0.00254225	delta	grams	=	-0.081349
	G	=	663.64	(J)	H	=	-72.3	(J)	S	=	-0.63	(J/K)	V	=	-245.86	(cc)	Cp	=	-0.09	(J/K)
**********----------**********
Title:	Dummy	Title
T	=	880	(C)	P	=	5	(kbars)	log(10)	f	O2	=	-12.43	delta	HM	=	-5.23	NNO	=	-0.17	QFM	=	0	COH	=	1.52	IW	=	4.37
Constraint	Flags:	fO2	path	=	QFM
Liquid	mass	=	3.24	(gm)	density	=	2.28	(gm/cc)	viscosity	=	1.76	(log	10	poise)	(analysis	in	wt	%)
	G	=	-53182.3	(J)	H	=	-41811.9	(J)	S	=	9.86	(J/K)	V	=	1.42	(cc)	Cp	=	4.83	(J/K)
	SiO2	TiO2	Al2O3	Fe2O3	Cr2O3	FeO	MnO	MgO	NiO	CoO	CaO	Na2O	K2O	P2O5	H2O	CO2	SO3	Cl2O-1	F2O-1
	48.89	0.14	22.87	0.46	0	1.78	4.63	0.88	0	0	2.42	6.62	1.36	0	9.95	0	0	0	0
garnet	mass	=	13.87	(gm)	density	=	3.78	(gm/cc)	(analysis	in	mole	%)
	(Ca0.16Fe''0.38Mg0.46)3Al2Si3O12
	G	=	-203310	(J)	H	=	-170782	(J)	S	=	28.21	(J/K)	V	=	3.67	(cc)	Cp	=	15.68	(J/K)
	almandine	grossular	pyrope
	38.19	16.24	45.57
orthopyroxene	mass	=	31.84	(gm)	density	=	3.34	(gm/cc)	(analysis	in	mole	%)
	opx	Na0.00Ca0.04Fe''0.44Mg1.43Fe'''0.01Ti0.00Al0.16Si1.91O6
	G	=	-477437	(J)	H	=	-399753	(J)	S	=	67.37	(J/K)	V	=	9.54	(cc)	Cp	=	38.41	(J/K)
	diopside	clinoenstatit	hedenbergite	alumino-buffo	buffonite	essenite	jadeite
	-49.38	95.98	44.15	7.51	-6.68	8.12	0.3
clinopyroxene	mass	=	7.74	(gm)	density	=	3.3	(gm/cc)	(analysis	in	mole	%)
	cpx	Na0.05Ca0.85Fe''0.16Mg0.73Fe'''0.04Ti0.04Al0.34Si1.79O6
	G	=	-119478	(J)	H	=	-101132	(J)	S	=	15.91	(J/K)	V	=	2.34	(cc)	Cp	=	8.86	(J/K)
	diopside	clinoenstatit	hedenbergite	alumino-buffo	buffonite	essenite	jadeite
	48.36	10.35	15.92	16.7	-8.24	12.17	4.74
clinopyroxene	mass	=	0.36	(gm)	density	=	3.5	(gm/cc)	(analysis	in	mole	%)
	cpx	Na0.03Ca0.94Fe''0.13Mg0.46Fe'''0.04Ti0.39Al0.81Si1.20O6
	G	=	-5439.42	(J)	H	=	-4618.18	(J)	S	=	0.71	(J/K)	V	=	0.1	(cc)	Cp	=	0.4	(J/K)
	diopside	clinoenstatit	hedenbergite	alumino-buffo	buffonite	essenite	jadeite
	1	2.96	12.91	75.92	2.34	1.97	2.9
hornblende	mass	=	8.12	(gm)	density	=	3.06	(gm/cc)	(analysis	in	mole	%)
	NaCa2Mg3.32Fe2+0.68Al1.00Fe3+0.00Al2Si6O22(OH)2
	G	=	-129316	(J)	H	=	-108277	(J)	S	=	18.24	(J/K)	V	=	2.66	(cc)	Cp	=	9.97	(J/K)
	pargasite	ferropargasit	magnesiohasti
	82.77	17.1	0.13
biotite	mass	=	0.16	(gm)	density	=	2.73	(gm/cc)	(analysis	in	mole	%)
	K(Fe''0.00Mg1.00)3AlSi3O10(OH)2
	G	=	-2625.29	(J)	H	=	-2198.9	(J)	S	=	0.37	(J/K)	V	=	0.06	(cc)	Cp	=	0.21	(J/K)
	annite	phlogopite
	0.41	99.59
feldspar	mass	=	34.68	(gm)	density	=	2.67	(gm/cc)	(analysis	in	mole	%)
	K0.01Na0.41Ca0.58Al1.58Si2.42O8
	G	=	-571645	(J)	H	=	-484472	(J)	S	=	75.6	(J/K)	V	=	13	(cc)	Cp	=	41.63	(J/K)
	albite	anorthite	sanidine
	40.84	58.37	0.8
Total	solids	mass	=	96.77	(gm)	density	=	3.09	(gm/cc)
	G	=	-1.50925e+06	(J)	H	=	-1.27123e+06	(J)	S	=	206.41	(J/K)	V	=	31.37	(cc)	Cp	=	115.15	(J/K)
Viscosity	of	the	System	cannot	be	computed.
System	mass	=	100.01	(gm)	density	=	3.05	(gm/cc)
	G	=	-1.56243e+06	(J)	H	=	-1.31305e+06	(J)	S	=	216.27	(J/K)	V	=	32.79	(cc)	Cp	=	119.98	(J/K)
Oxygen	delta	moles	=	-0.00261859	delta	grams	=	-0.0837917
	G	=	677.05	(J)	H	=	-73.54	(J)	S	=	-0.65	(J/K)	V	=	-251.06	(cc)	Cp	=	-0.09	(J/K)
**********----------**********
Title:	Dummy	Title
T	=	870	(C)	P	=	5	(kbars)	log(10)	f	O2	=	-12.61	delta	HM	=	-5.23	NNO	=	-0.16	QFM	=	0	COH	=	1.5	IW	=	4.39
Constraint	Flags:	fO2	path	=	QFM
Liquid	mass	=	3.07	(gm)	density	=	2.27	(gm/cc)	viscosity	=	1.63	(log	10	poise)	(analysis	in	wt	%)
	G	=	-50412.2	(J)	H	=	-39634.3	(J)	S	=	9.43	(J/K)	V	=	1.35	(cc)	Cp	=	4.59	(J/K)
	SiO2	TiO2	Al2O3	Fe2O3	Cr2O3	FeO	MnO	MgO	NiO	CoO	CaO	Na2O	K2O	P2O5	H2O	CO2	SO3	Cl2O-1	F2O-1
	48.52	0.12	22.7	0.43	0	1.63	4.89	0.83	0	0	2.35	6.66	1.21	0	10.67	0	0	0	0
garnet	mass	=	14.93	(gm)	density	=	3.78	(gm/cc)	(analysis	in	mole	%)
	(Ca0.16Fe''0.38Mg0.46)3Al2Si3O12
	G	=	-218440	(J)	H	=	-183909	(J)	S	=	30.21	(J/K)	V	=	3.95	(cc)	Cp	=	16.86	(J/K)
	almandine	grossular	pyrope
	38.27	16.22	45.51
orthopyroxene	mass	=	31.11	(gm)	density	=	3.34	(gm/cc)	(analysis	in	mole	%)
	opx	Na0.00Ca0.04Fe''0.44Mg1.44Fe'''0.01Ti0.00Al0.15Si1.91O6
	G	=	-466425	(J)	H	=	-391542	(J)	S	=	65.51	(J/K)	V	=	9.33	(cc)	Cp	=	37.51	(J/K)
	diopside	clinoenstatit	hedenbergite	alumino-buffo	buffonite	essenite	jadeite
	-48.71	96.06	43.72	7.3	-6.5	7.83	0.3
clinopyroxene	mass	=	8.03	(gm)	density	=	3.3	(gm/cc)	(analysis	in	mole	%)
	cpx	Na0.05Ca0.85Fe''0.16Mg0.74Fe'''0.04Ti0.04Al0.33Si1.80O6
	G	=	-123939	(J)	H	=	-105170	(J)	S	=	16.42	(J/K)	V	=	2.43	(cc)	Cp	=	9.18	(J/K)
	diopside	clinoenstatit	hedenbergite	alumino-buffo	buffonite	essenite	jadeite
	49.74	10.03	15.53	16.29	-8.11	11.77	4.75
clinopyroxene	mass	=	0.38	(gm)	density	=	3.51	(gm/cc)	(analysis	in	mole	%)
	cpx	Na0.03Ca0.94Fe''0.13Mg0.46Fe'''0.04Ti0.39Al0.81Si1.19O6
	G	=	-5760.5	(J)	H	=	-4902.53	(J)	S	=	0.75	(J/K)	V	=	0.11	(cc)	Cp	=	0.42	(J/K)
	diopside	clinoenstatit	hedenbergite	alumino-buffo	buffonite	essenite	jadeite
	0.96	2.82	12.69	76.57	2.37	1.67	2.91
hornblende	mass	=	7.7	(gm)	density	=	3.06	(gm/cc)	(analysis	in	mole	%)
	NaCa2Mg3.33Fe2+0.67Al1.00Fe3+0.00Al2Si6O22(OH)2
	G	=	-122462	(J)	H	=	-102787	(J)	S	=	17.21	(J/K)	V	=	2.52	(cc)	Cp	=	9.44	(J/K)
	pargasite	ferropargasit	magnesiohasti
	83.03	16.85	0.13
biotite	mass	=	0.26	(gm)	density	=	2.73	(gm/cc)	(analysis	in	mole	%)
	K(Fe''0.00Mg1.00)3AlSi3O10(OH)2
	G	=	-4177.68	(J)	H	=	-3507.42	(J)	S	=	0.59	(J/K)	V	=	0.09	(cc)	Cp	=	0.33	(J/K)
	annite	phlogopite
	0.38	99.62
feldspar	mass	=	34.54	(gm)	density	=	2.67	(gm/cc)	(analysis	in	mole	%)
	K0.01Na0.42Ca0.58Al1.58Si2.42O8
	G	=	-568621	(J)	H	=	-482920	(J)	S	=	74.97	(J/K)	V	=	12.95	(cc)	Cp	=	41.43	(J/K)
	albite	anorthite	sanidine
	41.58	57.68	0.74
Total	solids	mass	=	96.94	(gm)	density	=	3.09	(gm/cc)
	G	=	-1.50983e+06	(J)	H	=	-1.27474e+06	(J)	S	=	205.65	(J/K)	V	=	31.37	(cc)	Cp	=	115.17	(J/K)
Viscosity	of	the	System	cannot	be	computed.
System	mass	=	100.01	(gm)	density	=	3.06	(gm/cc)
	G	=	-1.56024e+06	(J)	H	=	-1.31437e+06	(J)	S	=	215.08	(J/K)	V	=	32.73	(cc)	Cp	=	119.77	(J/K)
Oxygen	delta	moles	=	-0.00268734	delta	grams	=	-0.0859918
	G	=	688.15	(J)	H	=	-74.52	(J)	S	=	-0.67	(J/K)	V	=	-255.42	(cc)	Cp	=	-0.1	(J/K)
**********----------**********
Title:	Dummy	Title
T	=	860	(C)	P	=	5	(kbars)	log(10)	f	O2	=	-12.79	delta	HM	=	-5.23	NNO	=	-0.15	QFM	=	0	COH	=	1.48	IW	=	4.42
Constraint	Flags:	fO2	path	=	QFM
Liquid	mass	=	2.92	(gm)	density	=	2.25	(gm/cc)	viscosity	=	1.5	(log	10	poise)	(analysis	in	wt	%)
	G	=	-47985.9	(J)	H	=	-37721.7	(J)	S	=	9.06	(J/K)	V	=	1.3	(cc)	Cp	=	4.39	(J/K)
	SiO2	TiO2	Al2O3	Fe2O3	Cr2O3	FeO	MnO	MgO	NiO	CoO	CaO	Na2O	K2O	P2O5	H2O	CO2	SO3	Cl2O-1	F2O-1
	48.07	0.11	22.54	0.4	0	1.5	5.14	0.78	0	0	2.28	6.7	1.07	0	11.42	0	0	0	0
garnet	mass	=	16.01	(gm)	density	=	3.78	(gm/cc)	(analysis	in	mole	%)
	(Ca0.16Fe''0.38Mg0.45)3Al2Si3O12
	G	=	-233951	(J)	H	=	-197416	(J)	S	=	32.24	(J/K)	V	=	4.23	(cc)	Cp	=	18.06	(J/K)
	almandine	grossular	pyrope
	38.32	16.19	45.49
orthopyroxene	mass	=	30.37	(gm)	density	=	3.33	(gm/cc)	(analysis	in	mole	%)
	opx	Na0.00Ca0.04Fe''0.43Mg1.45Fe'''0.01Ti0.00Al0.15Si1.92O6
	G	=	-455321	(J)	H	=	-383213	(J)	S	=	63.64	(J/K)	V	=	9.11	(cc)	Cp	=	36.61	(J/K)
	diopside	clinoenstatit	hedenbergite	alumino-buffo	buffonite	essenite	jadeite
	-48	96.15	43.23	7.09	-6.33	7.56	0.3
clinopyroxene	mass	=	8.36	(gm)	density	=	3.3	(gm/cc)	(analysis	in	mole	%)
	cpx	Na0.05Ca0.86Fe''0.15Mg0.74Fe'''0.03Ti0.04Al0.32Si1.81O6
	G	=	-129078	(J)	H	=	-109802	(J)	S	=	17.01	(J/K)	V	=	2.53	(cc)	Cp	=	9.56	(J/K)
	diopside	clinoenstatit	hedenbergite	alumino-buffo	buffonite	essenite	jadeite
	51.09	9.72	15.12	15.89	-7.98	11.39	4.77
clinopyroxene	mass	=	0.39	(gm)	density	=	3.51	(gm/cc)	(analysis	in	mole	%)
	cpx	Na0.03Ca0.94Fe''0.12Mg0.46Fe'''0.04Ti0.40Al0.82Si1.19O6
	G	=	-5980.16	(J)	H	=	-5101.63	(J)	S	=	0.78	(J/K)	V	=	0.11	(cc)	Cp	=	0.44	(J/K)
	diopside	clinoenstatit	hedenbergite	alumino-buffo	buffonite	essenite	jadeite
	0.94	2.69	12.47	77.19	2.4	1.39	2.93
hornblende	mass	=	7.23	(gm)	density	=	3.06	(gm/cc)	(analysis	in	mole	%)
	NaCa2Mg3.34Fe2+0.66Al1.00Fe3+0.00Al2Si6O22(OH)2
	G	=	-115044	(J)	H	=	-96794	(J)	S	=	16.11	(J/K)	V	=	2.37	(cc)	Cp	=	8.87	(J/K)
	pargasite	ferropargasit	magnesiohasti
	83.3	16.58	0.12
biotite	mass	=	0.34	(gm)	density	=	2.73	(gm/cc)	(analysis	in	mole	%)
	K(Fe''0.00Mg1.00)3AlSi3O10(OH)2
	G	=	-5533.46	(J)	H	=	-4656.61	(J)	S	=	0.77	(J/K)	V	=	0.12	(cc)	Cp	=	0.43	(J/K)
	annite	phlogopite
	0.35	99.65
feldspar	mass	=	34.38	(gm)	density	=	2.67	(gm/cc)	(analysis	in	mole	%)
	K0.01Na0.42Ca0.57Al1.57Si2.43O8
	G	=	-565167	(J)	H	=	-480989	(J)	S	=	74.29	(J/K)	V	=	12.89	(cc)	Cp	=	41.2	(J/K)
	albite	anorthite	sanidine
	42.36	56.96	0.68
Total	solids	mass	=	97.09	(gm)	density	=	3.1	(gm/cc)
	G	=	-1.51007e+06	(J)	H	=	-1.27797e+06	(J)	S	=	204.83	(J/K)	V	=	31.37	(cc)	Cp	=	115.17	(J/K)
Viscosity	of	the	System	cannot	be	computed.
System	mass	=	100.01	(gm)	density	=	3.06	(gm/cc)
	G	=	-1.55806e+06	(J)	H	=	-1.31569e+06	(J)	S	=	213.89	(J/K)	V	=	32.67	(cc)	Cp	=	119.56	(J/K)
Oxygen	delta	moles	=	-0.00274965	delta	grams	=	-0.0879855
	G	=	697.28	(J)	H	=	-75.27	(J)	S	=	-0.68	(J/K)	V	=	-259.05	(cc)	Cp	=	-0.1	(J/K)
**********----------**********
Title:	Dummy	Title
T	=	850	(C)	P	=	5	(kbars)	log(10)	f	O2	=	-12.98	delta	HM	=	-5.23	NNO	=	-0.15	QFM	=	0	COH	=	1.46	IW	=	4.44
Constraint	Flags:	fO2	path	=	QFM
Liquid	mass	=	2.78	(gm)	density	=	2.23	(gm/cc)	viscosity	=	1.36	(log	10	poise)	(analysis	in	wt	%)
	G	=	-45821.8	(J)	H	=	-36010.3	(J)	S	=	8.74	(J/K)	V	=	1.25	(cc)	Cp	=	4.21	(J/K)
	SiO2	TiO2	Al2O3	Fe2O3	Cr2O3	FeO	MnO	MgO	NiO	CoO	CaO	Na2O	K2O	P2O5	H2O	CO2	SO3	Cl2O-1	F2O-1
	47.56	0.09	22.38	0.37	0	1.36	5.39	0.73	0	0	2.2	6.75	0.94	0	12.23	0	0	0	0
garnet	mass	=	17.12	(gm)	density	=	3.78	(gm/cc)	(analysis	in	mole	%)
	(Ca0.16Fe''0.38Mg0.45)3Al2Si3O12
	G	=	-249735	(J)	H	=	-211215	(J)	S	=	34.3	(J/K)	V	=	4.52	(cc)	Cp	=	19.28	(J/K)
	almandine	grossular	pyrope
	38.35	16.16	45.49
orthopyroxene	mass	=	29.62	(gm)	density	=	3.33	(gm/cc)	(analysis	in	mole	%)
	opx	Na0.00Ca0.03Fe''0.43Mg1.46Fe'''0.01Ti0.00Al0.14Si1.92O6
	G	=	-444176	(J)	H	=	-374804	(J)	S	=	61.77	(J/K)	V	=	8.89	(cc)	Cp	=	35.7	(J/K)
	diopside	clinoenstatit	hedenbergite	alumino-buffo	buffonite	essenite	jadeite
	-47.26	96.25	42.69	6.9	-6.17	7.3	0.29
clinopyroxene	mass	=	8.73	(gm)	density	=	3.3	(gm/cc)	(analysis	in	mole	%)
	cpx	Na0.05Ca0.86Fe''0.15Mg0.75Fe'''0.03Ti0.04Al0.31Si1.81O6
	G	=	-134755	(J)	H	=	-114914	(J)	S	=	17.67	(J/K)	V	=	2.65	(cc)	Cp	=	9.97	(J/K)
	diopside	clinoenstatit	hedenbergite	alumino-buffo	buffonite	essenite	jadeite
	52.42	9.41	14.69	15.51	-7.86	11.03	4.8
clinopyroxene	mass	=	0.4	(gm)	density	=	3.51	(gm/cc)	(analysis	in	mole	%)
	cpx	Na0.03Ca0.94Fe''0.12Mg0.46Fe'''0.04Ti0.40Al0.82Si1.19O6
	G	=	-6126.77	(J)	H	=	-5239.11	(J)	S	=	0.79	(J/K)	V	=	0.12	(cc)	Cp	=	0.45	(J/K)
	diopside	clinoenstatit	hedenbergite	alumino-buffo	buffonite	essenite	jadeite
	0.91	2.56	12.23	77.8	2.43	1.12	2.95
hornblende	mass	=	6.74	(gm)	density	=	3.06	(gm/cc)	(analysis	in	mole	%)
	NaCa2Mg3.35Fe2+0.65Al1.00Fe3+0.00Al2Si6O22(OH)2
	G	=	-107168	(J)	H	=	-90385.4	(J)	S	=	14.94	(J/K)	V	=	2.21	(cc)	Cp	=	8.26	(J/K)
	pargasite	ferropargasit	magnesiohasti
	83.6	16.29	0.11
biotite	mass	=	0.41	(gm)	density	=	2.73	(gm/cc)	(analysis	in	mole	%)
	K(Fe''0.00Mg1.00)3AlSi3O10(OH)2
	G	=	-6723.59	(J)	H	=	-5671.41	(J)	S	=	0.94	(J/K)	V	=	0.15	(cc)	Cp	=	0.53	(J/K)
	annite	phlogopite
	0.33	99.67
feldspar	mass	=	34.19	(gm)	density	=	2.67	(gm/cc)	(analysis	in	mole	%)
	K0.01Na0.43Ca0.56Al1.56Si2.44O8
	G	=	-561392	(J)	H	=	-478770	(J)	S	=	73.56	(J/K)	V	=	12.83	(cc)	Cp	=	40.95	(J/K)
	albite	anorthite	sanidine
	43.15	56.22	0.63
Total	solids	mass	=	97.22	(gm)	density	=	3.1	(gm/cc)
	G	=	-1.51008e+06	(J)	H	=	-1.281e+06	(J)	S	=	203.96	(J/K)	V	=	31.36	(cc)	Cp	=	115.14	(J/K)
Viscosity	of	the	System	cannot	be	computed.
System	mass	=	100	(gm)	density	=	3.07	(gm/cc)
	G	=	-1.5559e+06	(J)	H	=	-1.31701e+06	(J)	S	=	212.69	(J/K)	V	=	32.6	(cc)	Cp	=	119.35	(J/K)
Oxygen	delta	moles	=	-0.0028064	delta	grams	=	-0.0898015
	G	=	704.72	(J)	H	=	-75.83	(J)	S	=	-0.69	(J/K)	V	=	-262.07	(cc)	Cp	=	-0.1	(J/K)
**********----------**********
Title:	Dummy	Title
T	=	840	(C)	P	=	5	(kbars)	log(10)	f	O2	=	-13.17	delta	HM	=	-5.23	NNO	=	-0.14	QFM	=	0	COH	=	1.44	IW	=	4.46
Constraint	Flags:	fO2	path	=	QFM
Liquid	mass	=	2.66	(gm)	density	=	2.22	(gm/cc)	viscosity	=	1.21	(log	10	poise)	(analysis	in	wt	%)
	G	=	-43862.3	(J)	H	=	-34455.5	(J)	S	=	8.45	(J/K)	V	=	1.2	(cc)	Cp	=	4.04	(J/K)
	SiO2	TiO2	Al2O3	Fe2O3	Cr2O3	FeO	MnO	MgO	NiO	CoO	CaO	Na2O	K2O	P2O5	H2O	CO2	SO3	Cl2O-1	F2O-1
	46.96	0.08	22.22	0.34	0	1.24	5.64	0.69	0	0	2.11	6.81	0.83	0	13.09	0	0	0	0
garnet	mass	=	18.24	(gm)	density	=	3.78	(gm/cc)	(analysis	in	mole	%)
	(Ca0.16Fe''0.38Mg0.46)3Al2Si3O12
	G	=	-265703	(J)	H	=	-225232	(J)	S	=	36.36	(J/K)	V	=	4.82	(cc)	Cp	=	20.52	(J/K)
	almandine	grossular	pyrope
	38.36	16.12	45.52
orthopyroxene	mass	=	28.87	(gm)	density	=	3.33	(gm/cc)	(analysis	in	mole	%)
	opx	Na0.00Ca0.03Fe''0.42Mg1.47Fe'''0.01Ti0.00Al0.14Si1.92O6
	G	=	-433029	(J)	H	=	-366348	(J)	S	=	59.9	(J/K)	V	=	8.67	(cc)	Cp	=	34.78	(J/K)
	diopside	clinoenstatit	hedenbergite	alumino-buffo	buffonite	essenite	jadeite
	-46.48	96.35	42.08	6.72	-6.01	7.06	0.29
clinopyroxene	mass	=	9.12	(gm)	density	=	3.3	(gm/cc)	(analysis	in	mole	%)
	cpx	Na0.05Ca0.86Fe''0.14Mg0.76Fe'''0.03Ti0.04Al0.31Si1.82O6
	G	=	-140860	(J)	H	=	-120415	(J)	S	=	18.37	(J/K)	V	=	2.77	(cc)	Cp	=	10.42	(J/K)
	diopside	clinoenstatit	hedenbergite	alumino-buffo	buffonite	essenite	jadeite
	53.72	9.1	14.26	15.13	-7.73	10.69	4.83
clinopyroxene	mass	=	0.41	(gm)	density	=	3.51	(gm/cc)	(analysis	in	mole	%)
	cpx	Na0.03Ca0.95Fe''0.12Mg0.46Fe'''0.03Ti0.40Al0.82Si1.18O6
	G	=	-6221.7	(J)	H	=	-5332.83	(J)	S	=	0.8	(J/K)	V	=	0.12	(cc)	Cp	=	0.45	(J/K)
	diopside	clinoenstatit	hedenbergite	alumino-buffo	buffonite	essenite	jadeite
	0.9	2.44	11.99	78.39	2.45	0.86	2.97
hornblende	mass	=	6.23	(gm)	density	=	3.06	(gm/cc)	(analysis	in	mole	%)
	NaCa2Mg3.36Fe2+0.64Al1.00Fe3+0.00Al2Si6O22(OH)2
	G	=	-98926.8	(J)	H	=	-83636.6	(J)	S	=	13.74	(J/K)	V	=	2.04	(cc)	Cp	=	7.62	(J/K)
	pargasite	ferropargasit	magnesiohasti
	83.91	15.99	0.11
biotite	mass	=	0.48	(gm)	density	=	2.73	(gm/cc)	(analysis	in	mole	%)
	K(Fe''0.00Mg1.00)3AlSi3O10(OH)2
	G	=	-7771.4	(J)	H	=	-6570.57	(J)	S	=	1.08	(J/K)	V	=	0.17	(cc)	Cp	=	0.61	(J/K)
	annite	phlogopite
	0.3	99.7
feldspar	mass	=	33.99	(gm)	density	=	2.67	(gm/cc)	(analysis	in	mole	%)
	K0.01Na0.44Ca0.55Al1.55Si2.45O8
	G	=	-557375	(J)	H	=	-476330	(J)	S	=	72.81	(J/K)	V	=	12.75	(cc)	Cp	=	40.69	(J/K)
	albite	anorthite	sanidine
	43.96	55.46	0.58
Total	solids	mass	=	97.34	(gm)	density	=	3.11	(gm/cc)
	G	=	-1.50989e+06	(J)	H	=	-1.28387e+06	(J)	S	=	203.05	(J/K)	V	=	31.34	(cc)	Cp	=	115.1	(J/K)
Viscosity	of	the	System	cannot	be	computed.
System	mass	=	100	(gm)	density	=	3.07	(gm/cc)
	G	=	-1.55375e+06	(J)	H	=	-1.31832e+06	(J)	S	=	211.5	(J/K)	V	=	32.54	(cc)	Cp	=	119.14	(J/K)
Oxygen	delta	moles	=	-0.00285833	delta	grams	=	-0.091463
	G	=	710.69	(J)	H	=	-76.23	(J)	S	=	-0.71	(J/K)	V	=	-264.54	(cc)	Cp	=	-0.1	(J/K)
**********----------**********
Title:	Dummy	Title
T	=	830	(C)	P	=	5	(kbars)	log(10)	f	O2	=	-13.37	delta	HM	=	-5.23	NNO	=	-0.13	QFM	=	0	COH	=	1.42	IW	=	4.49
Constraint	Flags:	fO2	path	=	QFM
Liquid	mass	=	2.55	(gm)	density	=	2.2	(gm/cc)	viscosity	=	1.06	(log	10	poise)	(analysis	in	wt	%)
	G	=	-42068.6	(J)	H	=	-33027.2	(J)	S	=	8.2	(J/K)	V	=	1.16	(cc)	Cp	=	3.89	(J/K)
	SiO2	TiO2	Al2O3	Fe2O3	Cr2O3	FeO	MnO	MgO	NiO	CoO	CaO	Na2O	K2O	P2O5	H2O	CO2	SO3	Cl2O-1	F2O-1
	46.29	0.07	22.05	0.31	0	1.13	5.88	0.64	0	0	2.03	6.87	0.72	0	14	0	0	0	0
garnet	mass	=	19.37	(gm)	density	=	3.79	(gm/cc)	(analysis	in	mole	%)
	(Ca0.16Fe''0.38Mg0.46)3Al2Si3O12
	G	=	-281781	(J)	H	=	-239405	(J)	S	=	38.41	(J/K)	V	=	5.12	(cc)	Cp	=	21.77	(J/K)
	almandine	grossular	pyrope
	38.36	16.07	45.58
orthopyroxene	mass	=	28.12	(gm)	density	=	3.33	(gm/cc)	(analysis	in	mole	%)
	opx	Na0.00Ca0.03Fe''0.41Mg1.48Fe'''0.01Ti0.00Al0.14Si1.92O6
	G	=	-421908	(J)	H	=	-357869	(J)	S	=	58.05	(J/K)	V	=	8.45	(cc)	Cp	=	33.86	(J/K)
	diopside	clinoenstatit	hedenbergite	alumino-buffo	buffonite	essenite	jadeite
	-45.68	96.45	41.43	6.55	-5.86	6.83	0.29
clinopyroxene	mass	=	9.54	(gm)	density	=	3.29	(gm/cc)	(analysis	in	mole	%)
	cpx	Na0.05Ca0.86Fe''0.14Mg0.76Fe'''0.03Ti0.04Al0.30Si1.82O6
	G	=	-147305	(J)	H	=	-126231	(J)	S	=	19.1	(J/K)	V	=	2.9	(cc)	Cp	=	10.89	(J/K)
	diopside	clinoenstatit	hedenbergite	alumino-buffo	buffonite	essenite	jadeite
	55	8.8	13.82	14.77	-7.61	10.36	4.86
clinopyroxene	mass	=	0.41	(gm)	density	=	3.51	(gm/cc)	(analysis	in	mole	%)
	cpx	Na0.03Ca0.95Fe''0.12Mg0.46Fe'''0.03Ti0.41Al0.83Si1.18O6
	G	=	-6281.14	(J)	H	=	-5396.4	(J)	S	=	0.8	(J/K)	V	=	0.12	(cc)	Cp	=	0.46	(J/K)
	diopside	clinoenstatit	hedenbergite	alumino-buffo	buffonite	essenite	jadeite
	0.89	2.32	11.74	78.96	2.48	0.61	3
hornblende	mass	=	5.7	(gm)	density	=	3.06	(gm/cc)	(analysis	in	mole	%)
	NaCa2Mg3.37Fe2+0.63Al1.00Fe3+0.00Al2Si6O22(OH)2
	G	=	-90403.1	(J)	H	=	-76614.5	(J)	S	=	12.5	(J/K)	V	=	1.86	(cc)	Cp	=	6.97	(J/K)
[truncated: 152 more rows]
